# Supplementary material
Source: PubMed Central journal article supplement (PMC10529296)
Supplement: NIHMS1913239-supplement-Appendix.pdf [file NIHMS1913239-supplement-Appendix.pdf]

## Contents of Supplementary appendix

|                   |                                                                                                                         |             |
|-------------------|-------------------------------------------------------------------------------------------------------------------------|-------------|
| <b>Method</b>     | GATHER checklist, with description of compliance and location of information                                            | <b>P5-6</b> |
| <b>Figure S1</b>  | Age-standardized incidence rate and all-ages number of asthma at the global level, 1990 to 2019.                        | <b>P7</b>   |
| <b>Figure S2</b>  | Age-standardized incidence rates of asthma at the socio-demographic index region level, 1990 to 2019.                   | <b>P8</b>   |
| <b>Figure S3</b>  | World map of age-standardized prevalence from asthma at the country level, 2019                                         | <b>P9</b>   |
| <b>Figure S4</b>  | All-ages number and age-standardized prevalence rates of asthma at the global level, 1990 to 2019.                      | <b>P10</b>  |
| <b>Figure S5</b>  | Age-standardized prevalence rates of asthma at the socio-demographic index region level, 1990 to 2019.                  | <b>P11</b>  |
| <b>Figure S6</b>  | World map of age-standardized disability-adjusted-life-years from asthma at the country level, 2019                     | <b>P12</b>  |
| <b>Figure S7</b>  | All-ages number and age-standardized disability-adjusted-life-years rates of asthma at the global level, 2019.          | <b>P13</b>  |
| <b>Figure S8</b>  | All-ages number and age-standardized disability-adjusted-life-years rates of asthma at the global level, 1990 to 2019.  | <b>P14</b>  |
| <b>Figure S9</b>  | Age-standardized years lived with disability rates of asthma at the socio-demographic index region level, 1990 to 2019. | <b>P15</b>  |
| <b>Figure S10</b> | Age-standardized mortality rates of asthma at the socio-demographic index regional level, 1990 to 2019.                 | <b>P16</b>  |

|                   |                                                                                                                                                                                                |            |
|-------------------|------------------------------------------------------------------------------------------------------------------------------------------------------------------------------------------------|------------|
| <b>Figure S11</b> | Age-standardized incidence rate and all-ages number of atopic dermatitis at the global level, 1990 to 2019.                                                                                    | <b>P17</b> |
| <b>Figure S12</b> | Age-standardized incidence rates of atopic dermatitis at the socio-demographic index regional level, 1990 to 2019.                                                                             | <b>P18</b> |
| <b>Figure S13</b> | World map of age-standardized prevalence from atopic dermatitis at the country level, 2019                                                                                                     | <b>P19</b> |
| <b>Figure S14</b> | All-ages number and age-standardized prevalence rates of atopic dermatitis at the global level, 1990 to 2019.                                                                                  | <b>P20</b> |
| <b>Figure S15</b> | Age-standardized prevalence rates of atopic dermatitis at the socio-demographic index regional level, 1990 to 2019.                                                                            | <b>P21</b> |
| <b>Figure S16</b> | World map of age-standardized disability-adjusted-life-years from atopic dermatitis at the country level, 2019                                                                                 | <b>P22</b> |
| <b>Figure S17</b> | All-ages number and age-standardized disability-adjusted-life-years rates of atopic dermatitis at the global level, 2019.                                                                      | <b>P23</b> |
| <b>Figure S18</b> | All-ages number and age-standardized disability-adjusted-life-years rates of atopic dermatitis at the global level, 1990 to 2019.                                                              | <b>P24</b> |
| <b>Figure S19</b> | Age-standardized disability-adjusted-life-years rates due asthma attributable to risk factors (high-body mass index, occupational asthmagens, and smoking) for 21 GBD regions, both sex, 2019. | <b>P25</b> |
| <b>Figure S20</b> | Age-standardized disability-adjusted-life-years rates due asthma attributable to risk factors (high-body mass index, occupational asthmagens, and smoking) for 21 GBD regions, by sex, 2019.   | <b>P26</b> |
| <b>Figure S21</b> | Percentage of age-standardized deaths due to asthma attributable to risk factors for                                                                                                           | <b>P27</b> |

|                   |                                                                                                                                                                                           |               |
|-------------------|-------------------------------------------------------------------------------------------------------------------------------------------------------------------------------------------|---------------|
|                   | 21 GBD regions, both sex, 2019.                                                                                                                                                           |               |
| <b>Figure S22</b> | Age-standardized mortality rate due asthma attributable to risk factors (high-body mass index, occupational asthmagens, and smoking) for 21 GBD regions, both sex, 2019.                  | <b>P28</b>    |
| <b>Figure S23</b> | Percentage of age-standardized deaths due to asthma attributable to risk factors for 21 GBD regions, by sex, 2019.                                                                        | <b>P29</b>    |
| <b>Figure S24</b> | Age-standardized mortality rate due asthma attributable to risk factors (high-body mass index, occupational asthmagens, and smoking) for 21 GBD regions, by sex, 2019.                    | <b>P30</b>    |
| <b>Figure S25</b> | All-ages number of disability-adjusted-life-years due to asthma attributable to high-body mass index (A), occupational asthmagens (B) and smoking (C) for 21 GBD regions, both sex, 2019. | <b>P31</b>    |
| <b>Figure S26</b> | All-ages number of disability-adjusted-life-years due to asthma attributable to high-body mass index (A), occupational asthmagens (B) and smoking (C) for 21 GBD regions, both sex, 2019. | <b>P32</b>    |
| <b>Figure S27</b> | All-ages number of deaths due to asthma attributable to high-body mass index (A), occupational asthmagens (B) and smoking (C) for 21 GBD regions, both sex, 2019.                         | <b>P33</b>    |
| <b>Figure S28</b> | All-ages number of deaths due to asthma attributable to high-body mass index (A), occupational asthmagens (B) and smoking (C) for 21 GBD regions, by sex, 2019.                           | <b>P34</b>    |
| <b>Table S1</b>   | Incidence rates of asthma in 1990 and 2019 for both sexes and percentage change in age-standardized rates by location.                                                                    | <b>P35-48</b> |
| <b>Table S2</b>   | Asthma prevalence in 1990 and 2019 for both sexes and percentage change in age-standardized rates by location.                                                                            | <b>P49-63</b> |

|                  |                                                                                                                                                     |                 |
|------------------|-----------------------------------------------------------------------------------------------------------------------------------------------------|-----------------|
| <b>Table S3</b>  | Disability-adjusted-life-years due to asthma in 1990 and 2019 for both sexes and percentage change in age-standardized rates by location.           | <b>P64-78</b>   |
| <b>Table S4</b>  | Years lived with disabilities due to asthma in 1990 and 2019 for both sexes and percentage change in age-standardized rates by location.            | <b>P79-92</b>   |
| <b>Table S5</b>  | Incidence rates of atopic dermatitis in 1990 and 2019 for both sexes and percentage change in age-standardized rates by location.                   | <b>P93-106</b>  |
| <b>Table S6</b>  | Atopic dermatitis prevalence in 1990 and 2019 for both sexes and percentage change in age-standardized rates by location.                           | <b>P107-121</b> |
| <b>Table S7</b>  | Disability-adjusted-life-years due to atopic dermatitis in 1990 and 2019 for both sexes and percentage change in age-standardized rates by location | <b>P122-135</b> |
| <b>Table S8</b>  | Years lived with disabilities due to atopic dermatitis in 1990 and 2019 for both sexes and percentage change in age-standardized rates by location. | <b>P136-149</b> |
| <b>Table S9</b>  | Disability-adjusted-life-years of asthma in accordance with socio-demographic index                                                                 | <b>P150</b>     |
| <b>Table S10</b> | Disability-adjusted-life-years of atopic dermatitis in accordance with socio-demographic index                                                      | <b>P151</b>     |

**Checklist of information that should be included in new reports of global health estimates for  
GBD 2019**

| <b>Item #</b>                                                                                         | <b>Checklist item</b>                                                                                                                                                                                                                                                                                                                                                                     | <b>Reported on page #</b>                                                                                                                                |
|-------------------------------------------------------------------------------------------------------|-------------------------------------------------------------------------------------------------------------------------------------------------------------------------------------------------------------------------------------------------------------------------------------------------------------------------------------------------------------------------------------------|----------------------------------------------------------------------------------------------------------------------------------------------------------|
| <b>Objectives and funding</b>                                                                         |                                                                                                                                                                                                                                                                                                                                                                                           |                                                                                                                                                          |
| <b>1</b>                                                                                              | Define the indicator(s), populations (including age, sex, and geographic entities), and time period(s) for which estimates were made.                                                                                                                                                                                                                                                     | Main text (Methods)                                                                                                                                      |
| <b>2</b>                                                                                              | List the funding sources for the work.                                                                                                                                                                                                                                                                                                                                                    | Funding                                                                                                                                                  |
| <b>Data Inputs</b>                                                                                    |                                                                                                                                                                                                                                                                                                                                                                                           |                                                                                                                                                          |
| <i>For all data inputs from multiple sources that are synthesized as part of the study:</i>           |                                                                                                                                                                                                                                                                                                                                                                                           |                                                                                                                                                          |
| <b>3</b>                                                                                              | Describe how the data were identified and how the data were accessed.                                                                                                                                                                                                                                                                                                                     | Main text (Methods) and appendix                                                                                                                         |
| <b>4</b>                                                                                              | Specify the inclusion and exclusion criteria. Identify all ad-hoc exclusions.                                                                                                                                                                                                                                                                                                             | Main text (Methods) and appendix                                                                                                                         |
| <b>5</b>                                                                                              | Provide information on all included data sources and their main characteristics. For each data source used, report reference information or contact name/institution, population represented, data collection method, year(s) of data collection, sex and age range, diagnostic criteria or measurement method, and sample size, as relevant.                                             | Data Input Sources<br>Tool:<br><a href="http://ghdx.healthdata.org/gbd2019/data-input-sources">http://ghdx.healthdata.org/gbd2019/data-input-sources</a> |
| <b>6</b>                                                                                              | Identify and describe any categories of input data that have potentially important biases (e.g., based on characteristics listed in item 5).                                                                                                                                                                                                                                              | Main text (Methods) and appendix                                                                                                                         |
| <i>For data inputs that contribute to the analysis but were not synthesized as part of the study:</i> |                                                                                                                                                                                                                                                                                                                                                                                           |                                                                                                                                                          |
| <b>7</b>                                                                                              | Describe and give sources for any other data inputs.                                                                                                                                                                                                                                                                                                                                      | Data Input Sources<br>Tool:<br><a href="http://ghdx.healthdata.org/gbd2019/data-input-sources">http://ghdx.healthdata.org/gbd2019/data-input-sources</a> |
| <i>For all data inputs:</i>                                                                           |                                                                                                                                                                                                                                                                                                                                                                                           |                                                                                                                                                          |
| <b>8</b>                                                                                              | Provide all data inputs in a file format from which data can be efficiently extracted (e.g., a spreadsheet rather than a PDF), including all relevant meta-data listed in item 5. For any data inputs that cannot be shared because of ethical or legal reasons, such as third-party ownership, provide a contact name or the name of the institution that retains the right to the data. | Main text (Methods) and appendix                                                                                                                         |
| <b>Data analysis</b>                                                                                  |                                                                                                                                                                                                                                                                                                                                                                                           |                                                                                                                                                          |
| <b>9</b>                                                                                              | Provide a conceptual overview of the data analysis method. A diagram may be helpful.                                                                                                                                                                                                                                                                                                      | Main text (Methods) and appendix                                                                                                                         |
| <b>10</b>                                                                                             | Provide a detailed description of all steps of the analysis, including mathematical formulae. This description should cover, as relevant, data cleaning, data pre-processing,                                                                                                                                                                                                             | Main text (Methods)                                                                                                                                      |

|                               |                                                                                                                                                                  |                                                                                                                                                          |
|-------------------------------|------------------------------------------------------------------------------------------------------------------------------------------------------------------|----------------------------------------------------------------------------------------------------------------------------------------------------------|
|                               | data adjustments and weighting of data sources, and mathematical or statistical model(s).                                                                        | and appendix                                                                                                                                             |
| 11                            | Describe how candidate models were evaluated and how the final model(s) were selected.                                                                           | Previously published in capstone paper                                                                                                                   |
| 12                            | Provide the results of an evaluation of model performance, if done, as well as the results of any relevant sensitivity analysis.                                 | Previously published in capstone paper                                                                                                                   |
| 13                            | Describe methods for calculating uncertainty of the estimates. State which sources of uncertainty were, and were not, accounted for in the uncertainty analysis. | Main text (Methods) and appendix                                                                                                                         |
| 14                            | State how analytic or statistical source code used to generate estimates can be accessed.                                                                        | Data Input Sources<br>Tool:<br><a href="http://ghdx.healthdata.org/gbd2019/data-input-sources">http://ghdx.healthdata.org/gbd2019/data-input-sources</a> |
| <b>Results and Discussion</b> |                                                                                                                                                                  |                                                                                                                                                          |
| 15                            | Provide published estimates in a file format from which data can be efficiently extracted.                                                                       | Main text (Methods) and appendix                                                                                                                         |
| 16                            | Report a quantitative measure of the uncertainty of the estimates (e.g. uncertainty intervals).                                                                  | Main text (Methods) and appendix                                                                                                                         |
| 17                            | Interpret results in light of existing evidence. If updating a previous set of estimates, describe the reasons for changes in estimates.                         | Main text (Methods) and appendix                                                                                                                         |
| 18                            | Discuss limitations of the estimates. Include a discussion of any modelling assumptions or data limitations that affect interpretation of the estimates.         | Main text (Methods) and appendix                                                                                                                         |

**Figure S1.** Age-standardized incidence rate and all-ages number of asthma at the global level, 1990 to 2019.

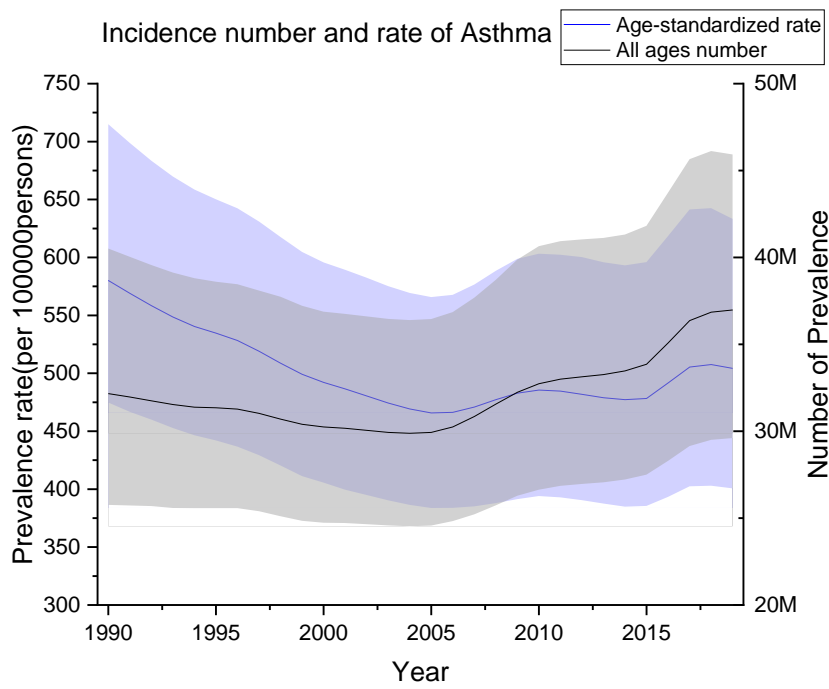

**Figure S2.** Age-standardized incidence rates of asthma at the socio-demographic index region level, 1990 to 2019. SDI=sociodemographic index.

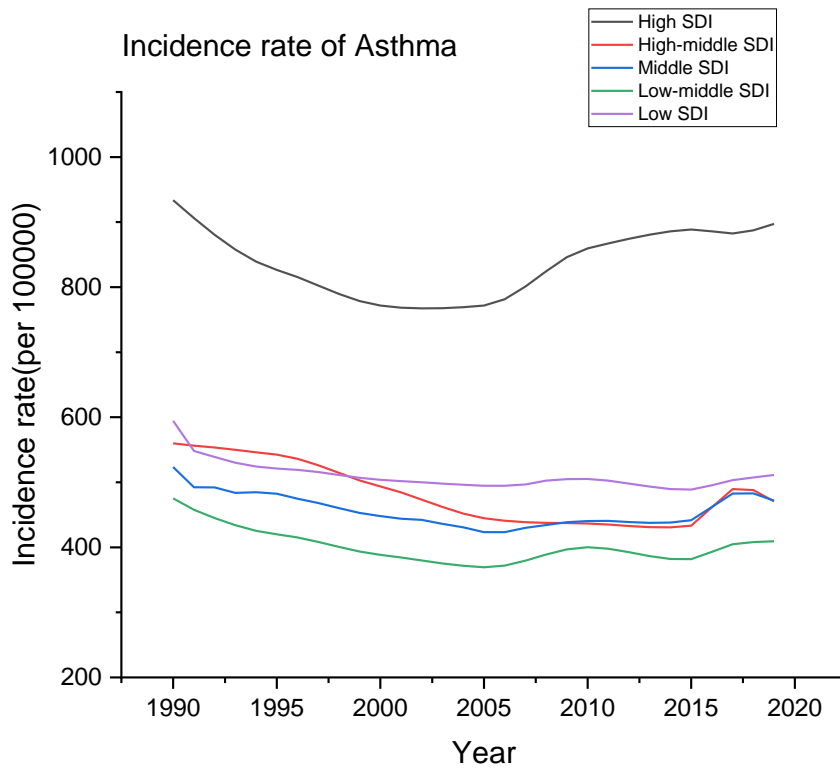



**Figure S3.** World map of age-standardized prevalence from asthma at the country level, 2019

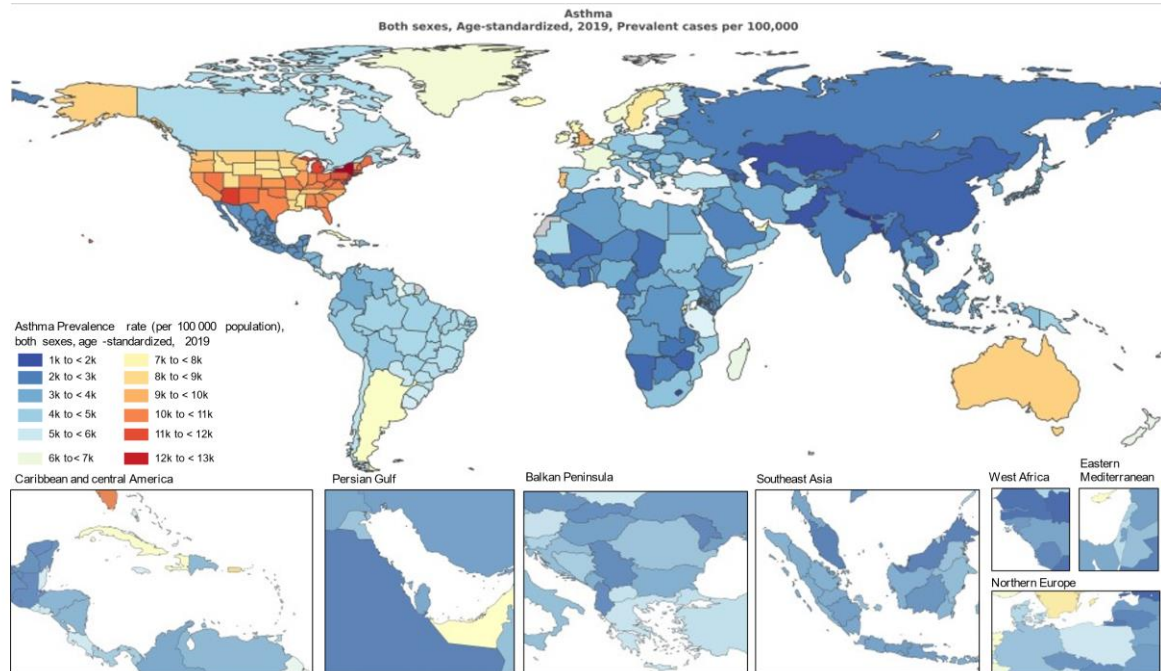

**Figure S4.** All-ages number and age-standardized prevalence rates of asthma at the global level, 1990 to 2019.

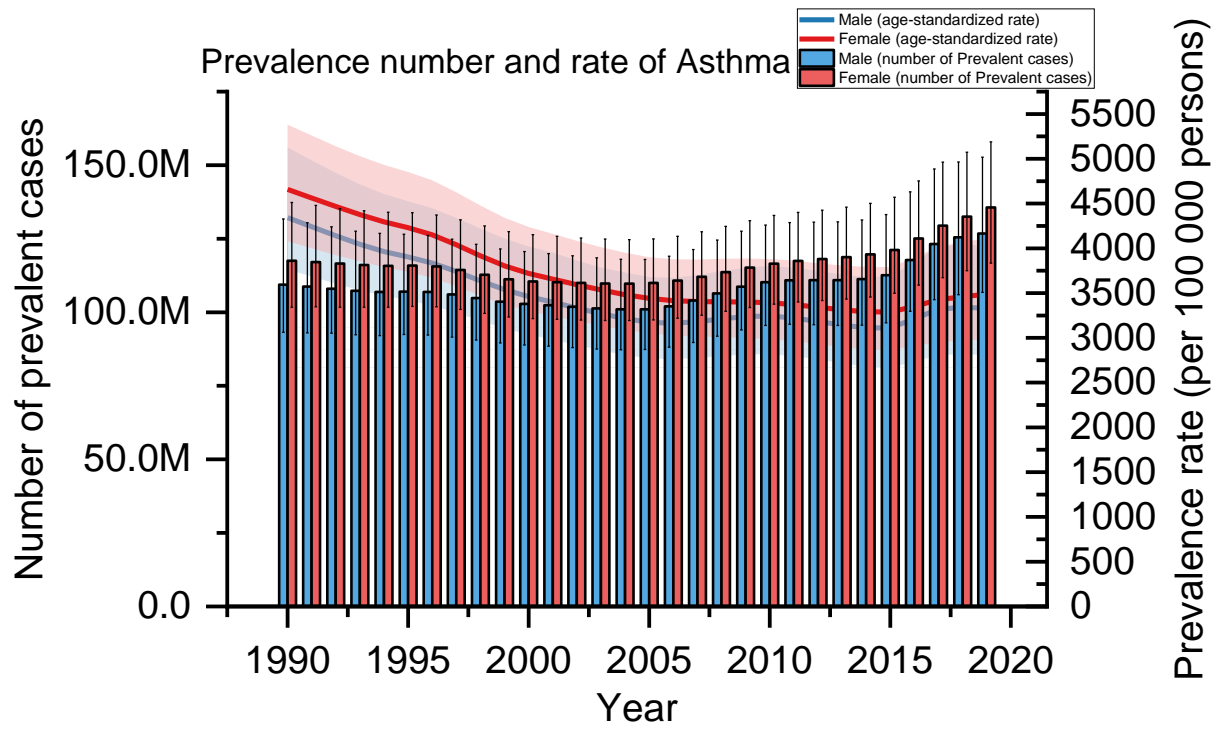

**Figure S5.** Age-standardized prevalence rates of asthma at the socio-demographic index region level, 1990 to 2019. SDI=sociodemographic index.

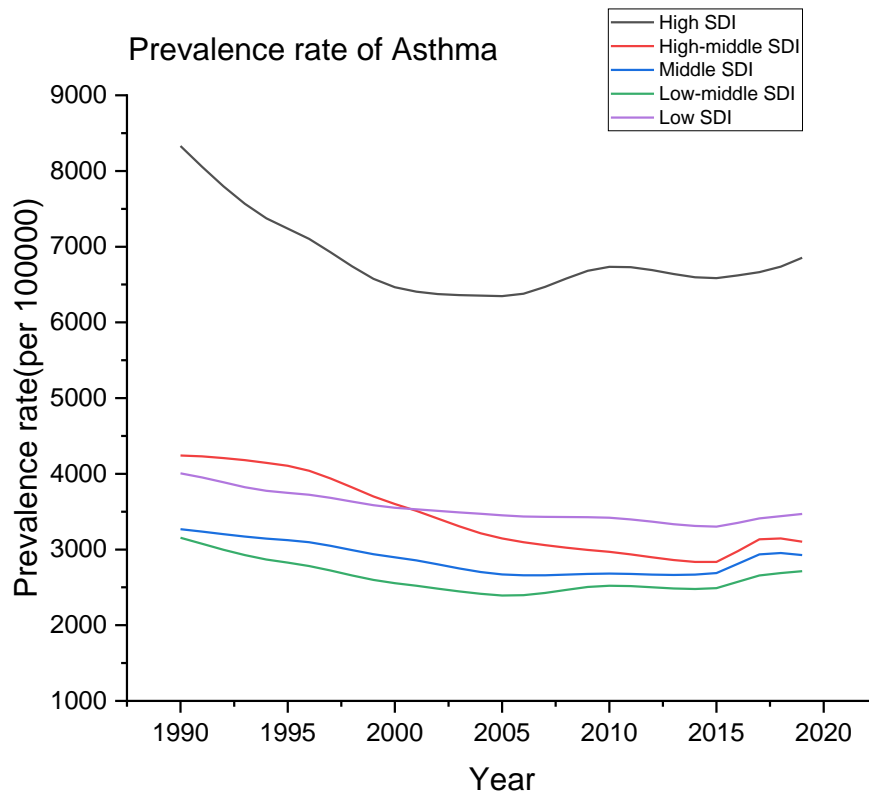

**Figure S6.** World map of age-standardized DALY rates from asthma at the country level, 2019

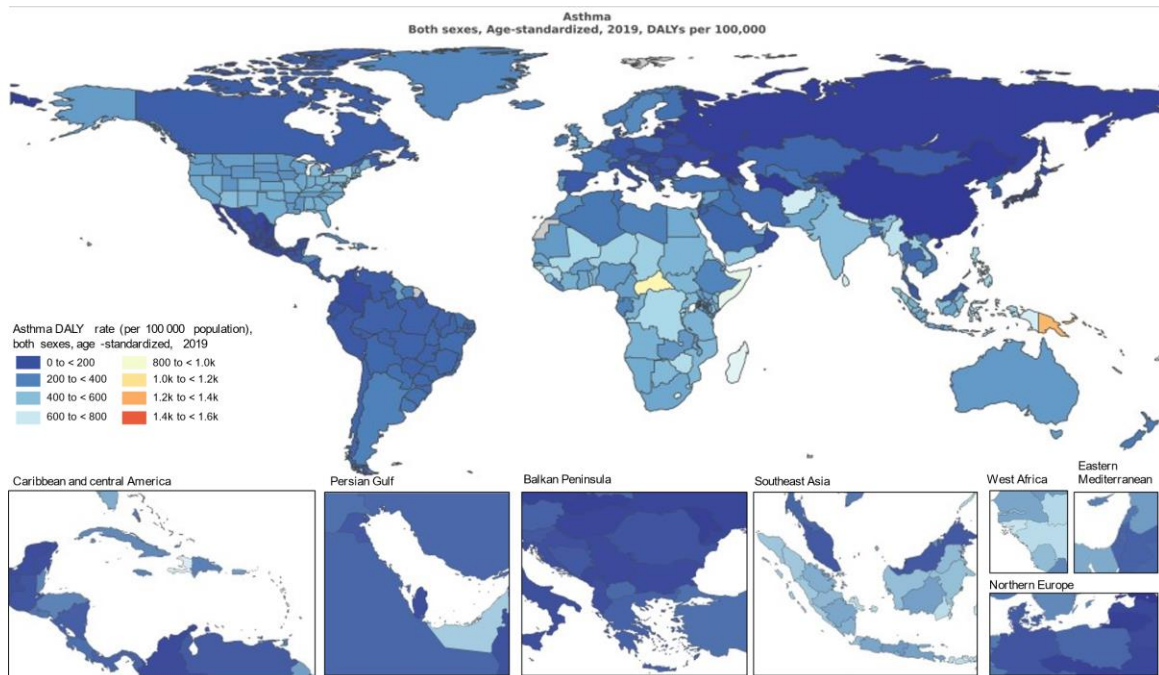

**Figure S7.** All-ages number and age-standardized DALY rates of asthma at the global level, 2019.

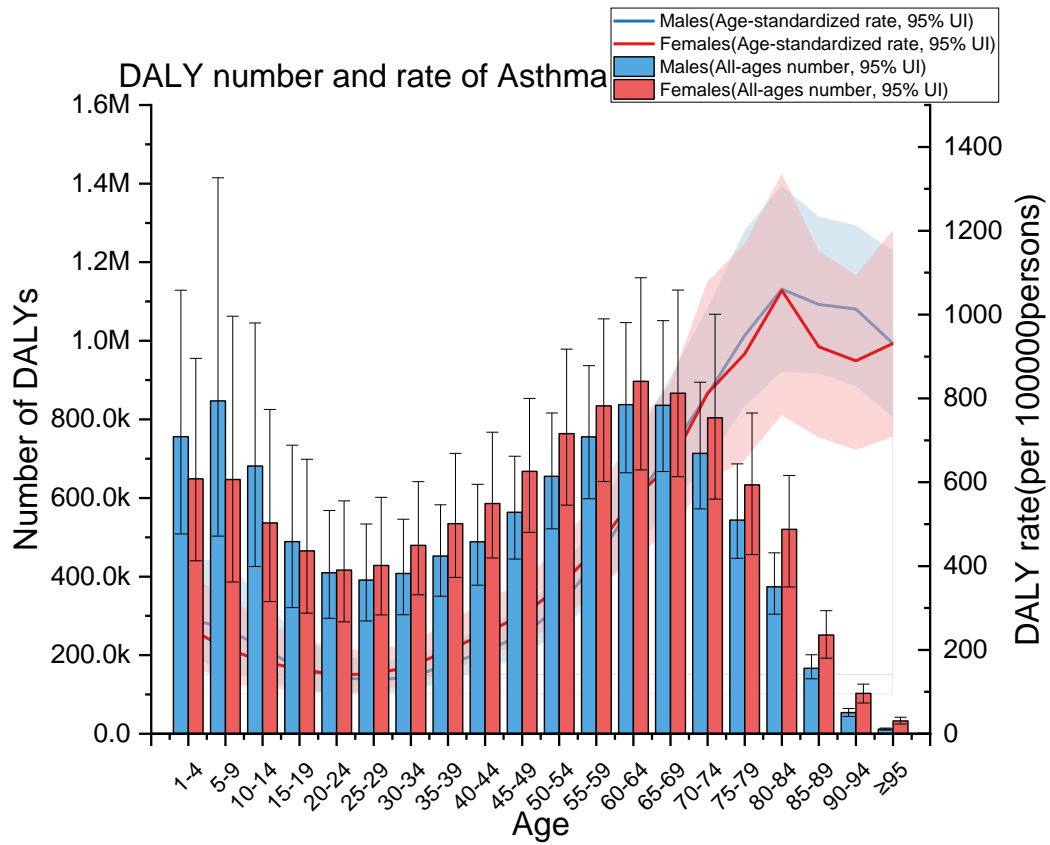

**Figure S8.** All-ages number and age-standardized disability-adjusted-life-years rates of asthma at the global level, 1990 to 2019.

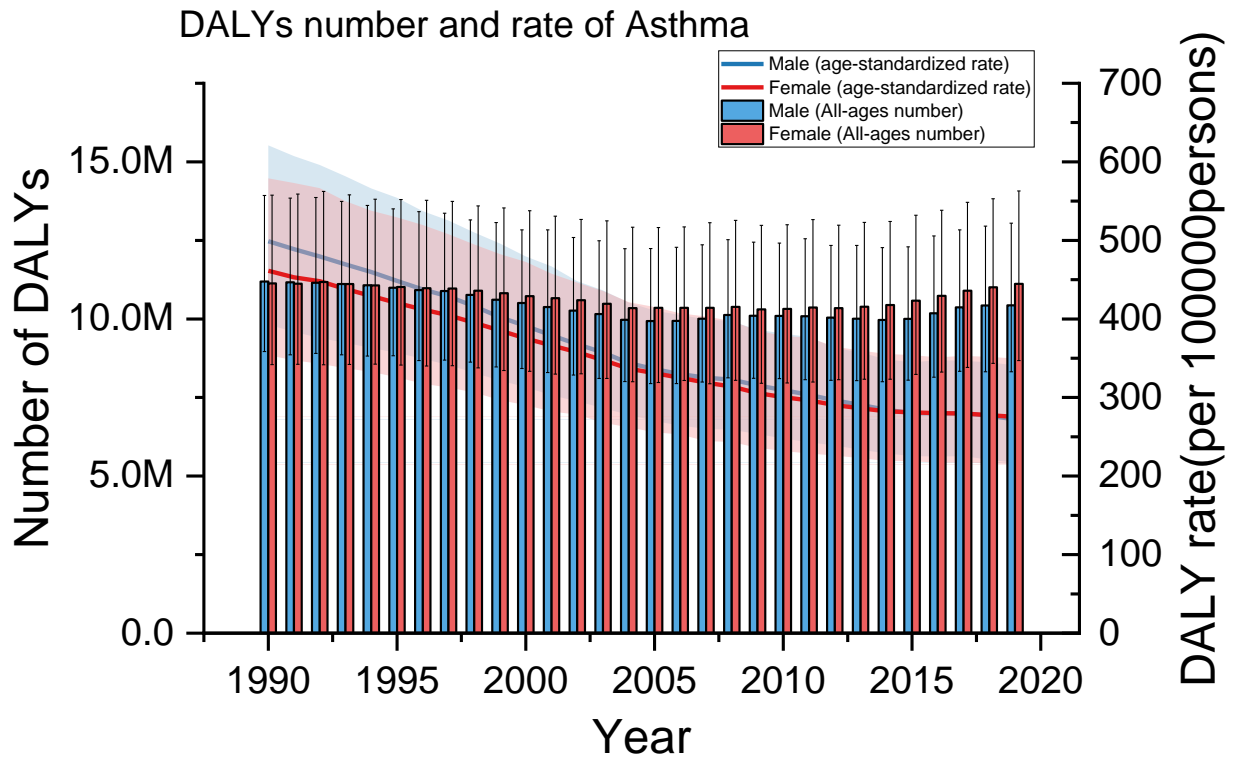

**Figure S9.** Age-standardized years lived with disabilities rates of asthma at the socio-demographic index region level, 1990 to 2019. SDI=sociodemographic index; YLDs=years lived with disabilities

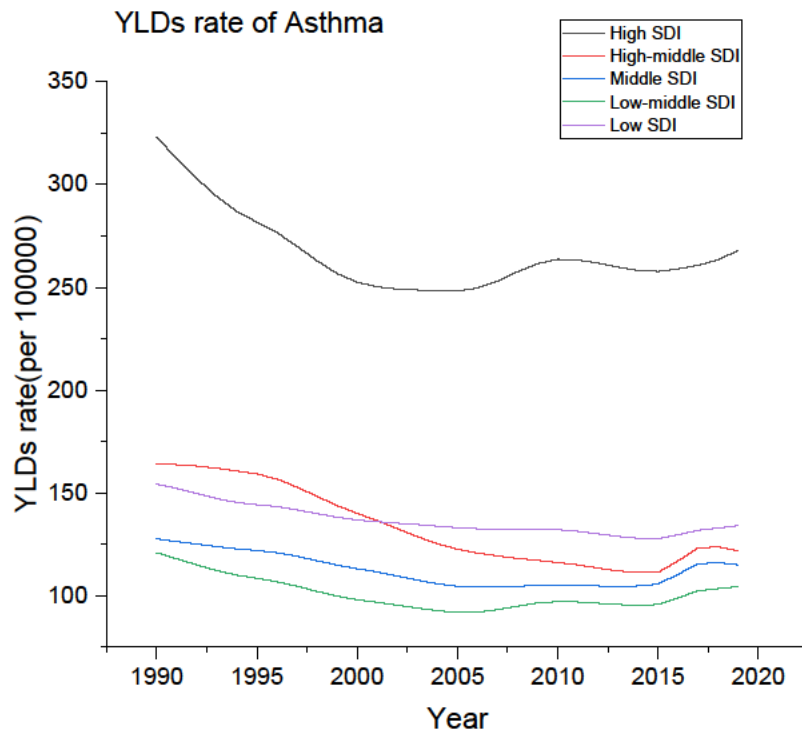

**Figure S10.** Age-standardized mortality rates of asthma at the socio-demographic index region level, 1990 to 2019. SDI=sociodemographic index.

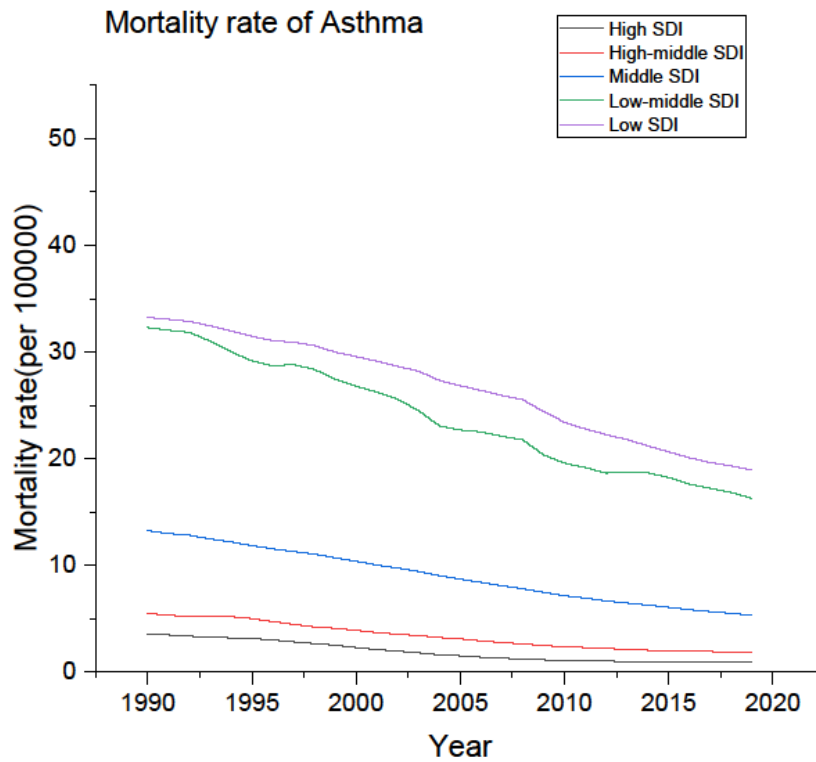



**Figure S11.** Age-standardized incidence rate and all-ages number of atopic dermatitis at the global level, 1990 to 2019.

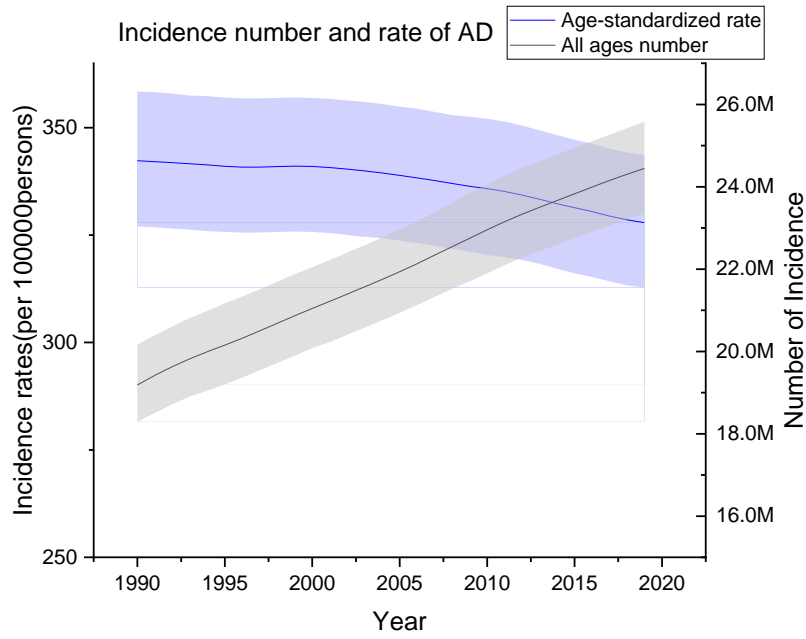

**Figure S12.** Age-standardized incidence rates of atopic dermatitis at the socio-demographic index region level, 1990 to 2019. SDI=socio-demographic index.

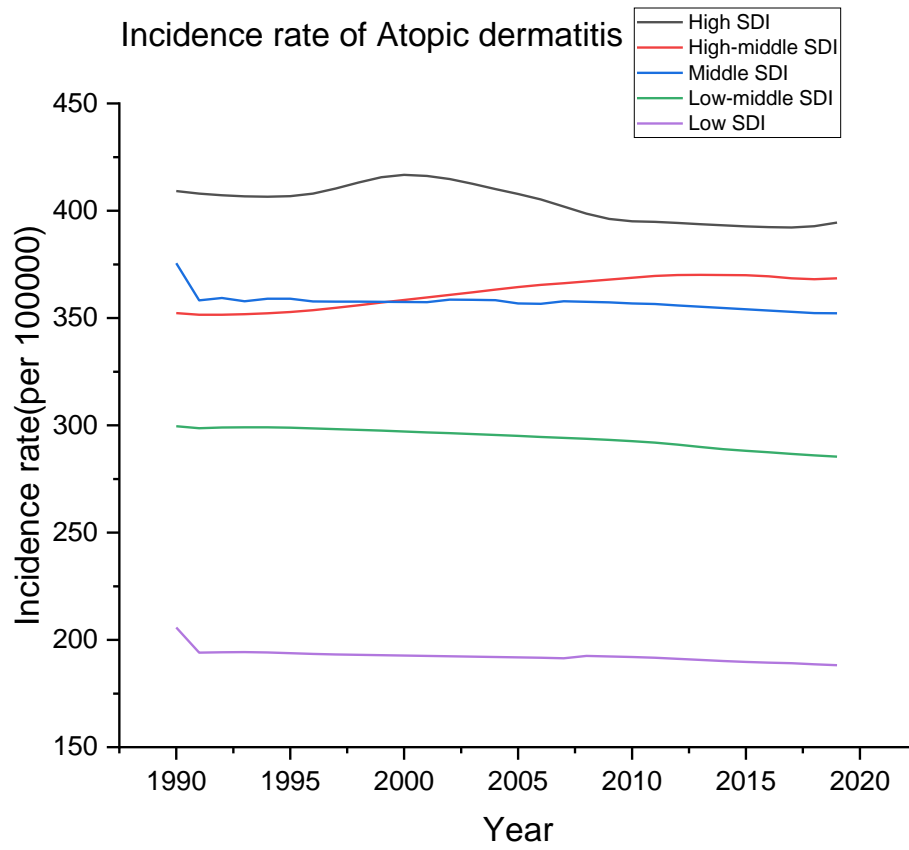

**Figure S13.** World map of age-standardized prevalence from atopic dermatitis at the country level, 2019

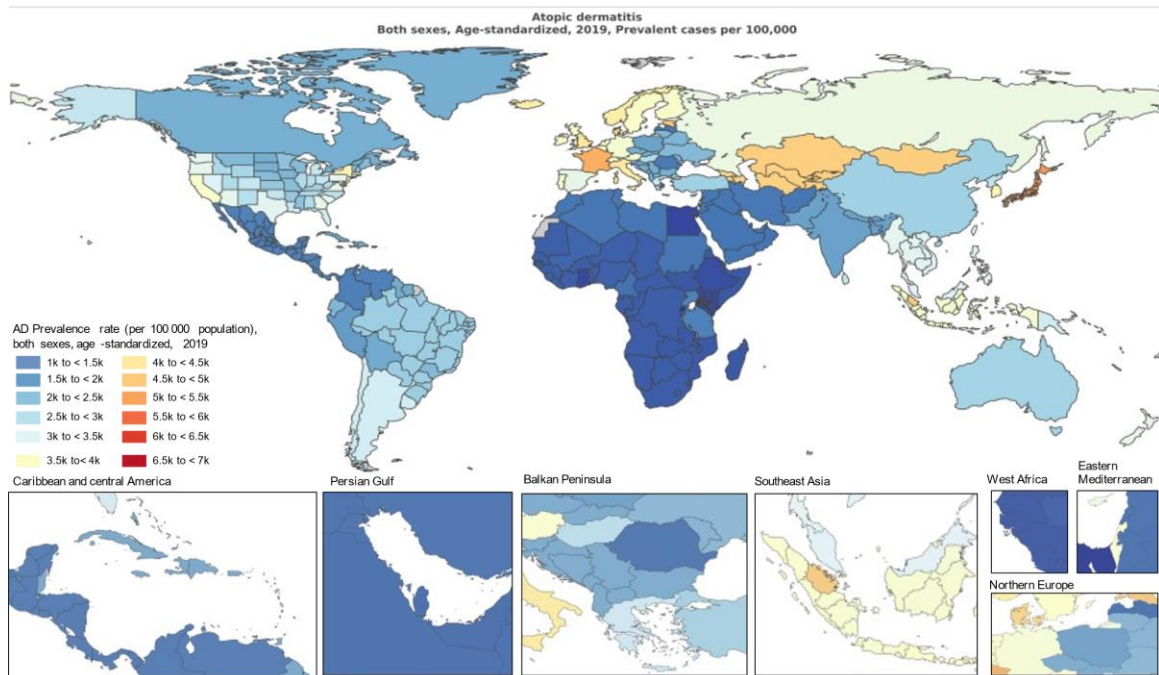

**Figure S14.** All-ages number and age-standardized prevalence rates of atopic dermatitis at the global level, 1990 to 2019.

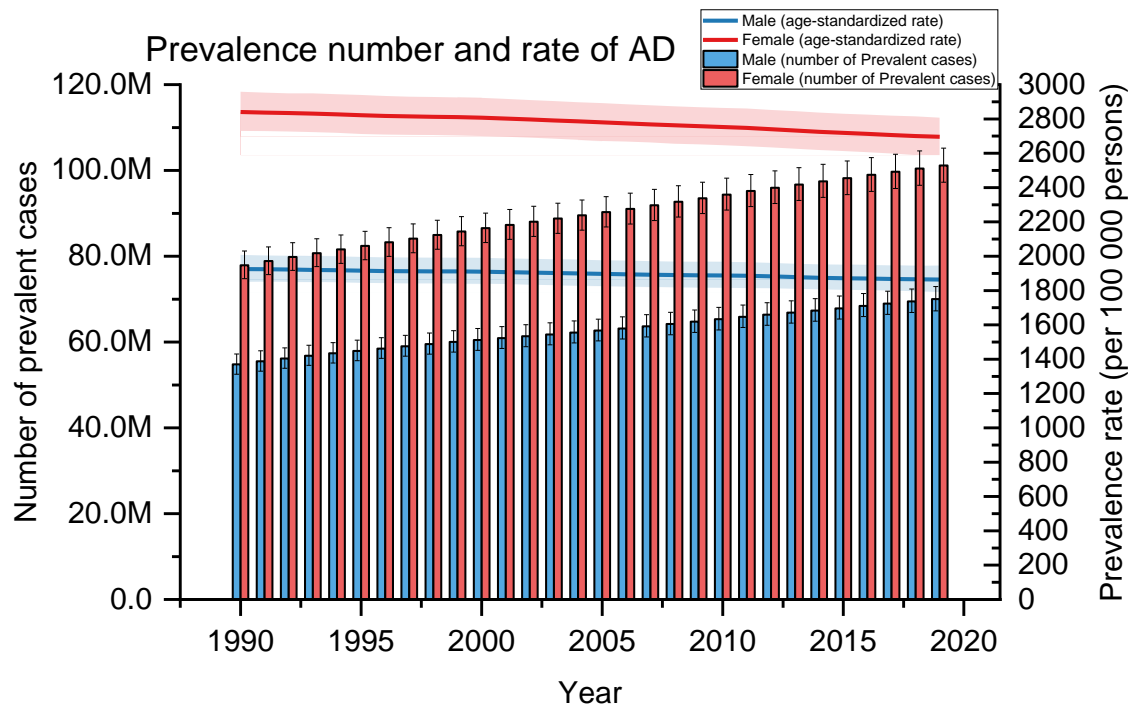

**Figure S15.** Age-standardized prevalence rates of atopic dermatitis at the socio-demographic index region level, 1990 to 2019. SDI=sociodemographic index.

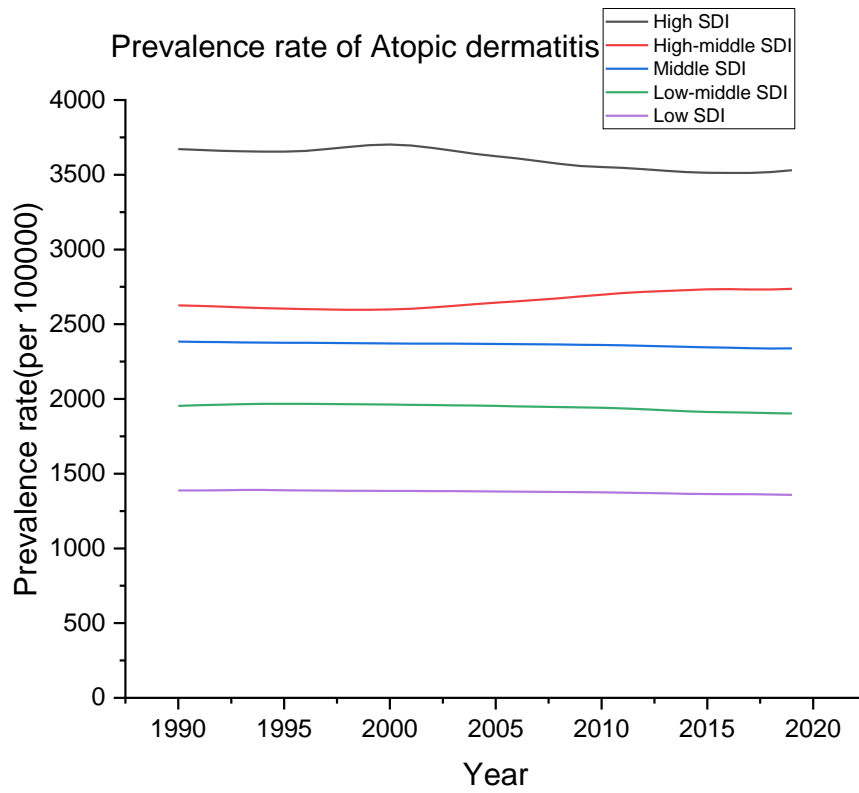

**Figure S16.** World map of age-standardized disability-adjusted-life-years rates from atopic dermatitis at the country level, 2019

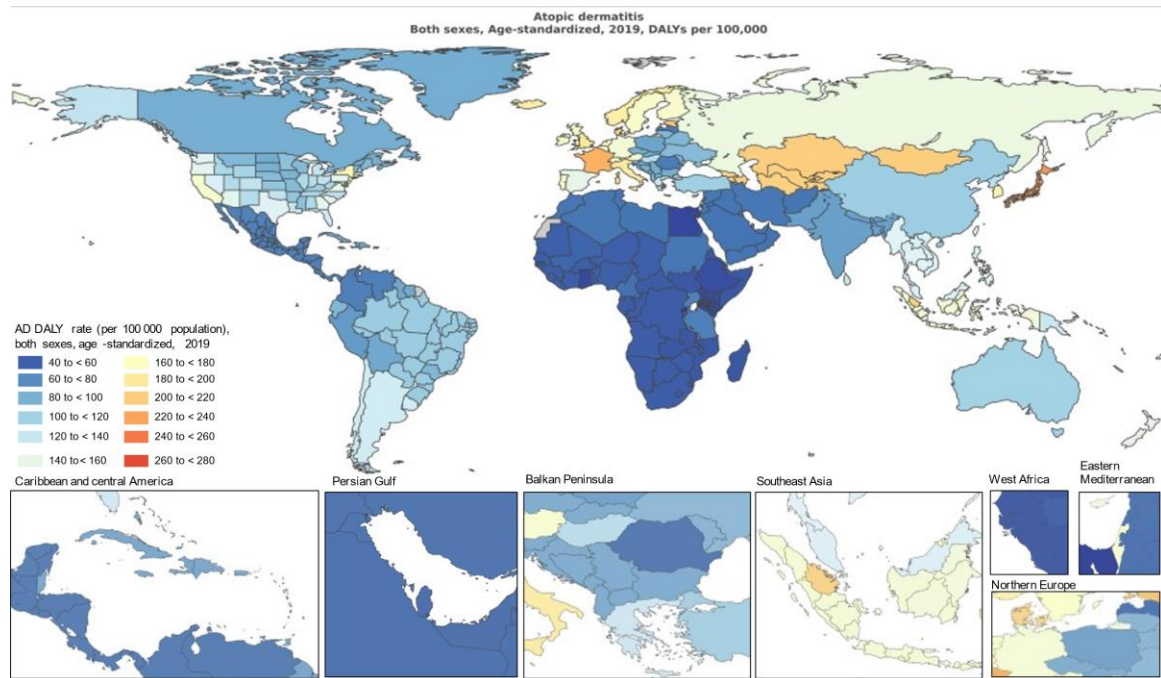

**Figure S17.** All-ages number and age-standardized disability-adjusted-life-years rates of atopic dermatitis at the global level, 2019. DALYs=disability-adjusted-life-years.

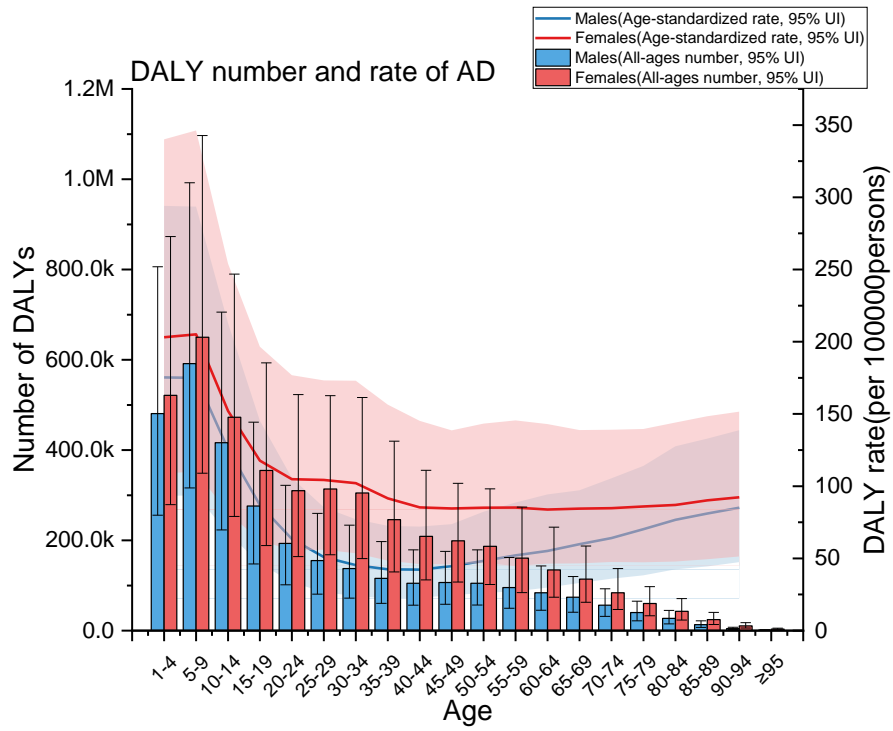

**Figure S18.** All-ages number and age-standardized disability-adjusted-life-years rates of atopic dermatitis at the global level, 1990 to 2019.

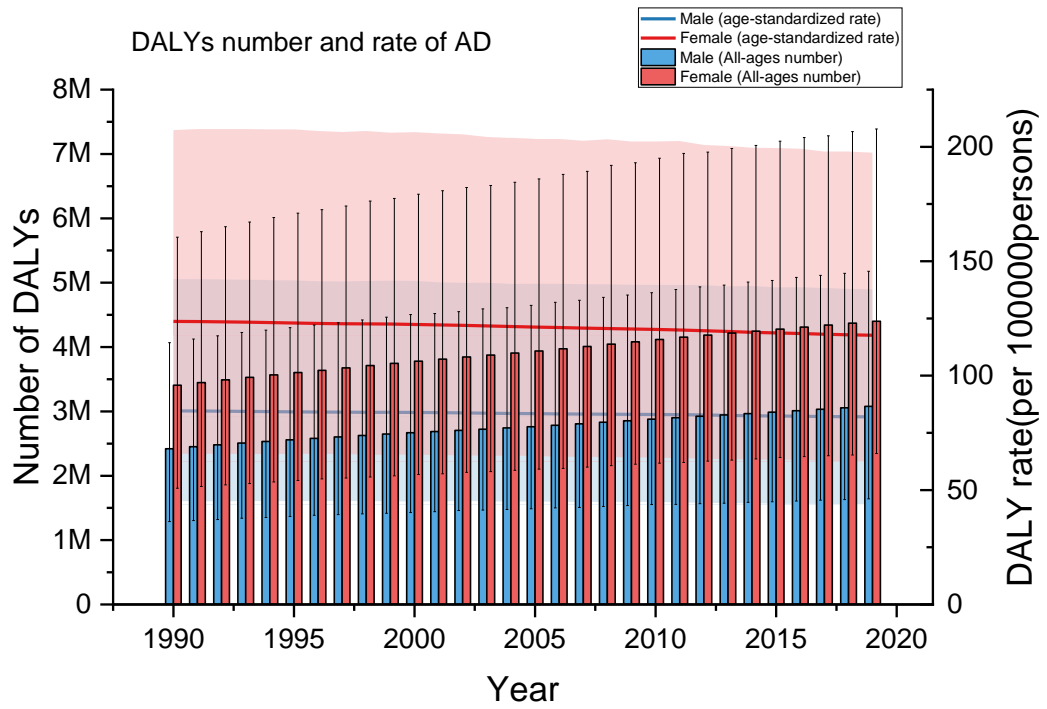



**Figure S19.** Age-standardized disability-adjusted-life-years rate due asthma attributable to risk factors (high-body mass index, occupational asthmagens, and smoking) for 21 GBD regions, both sex, 2019. DALY, disability-adjusted life year.

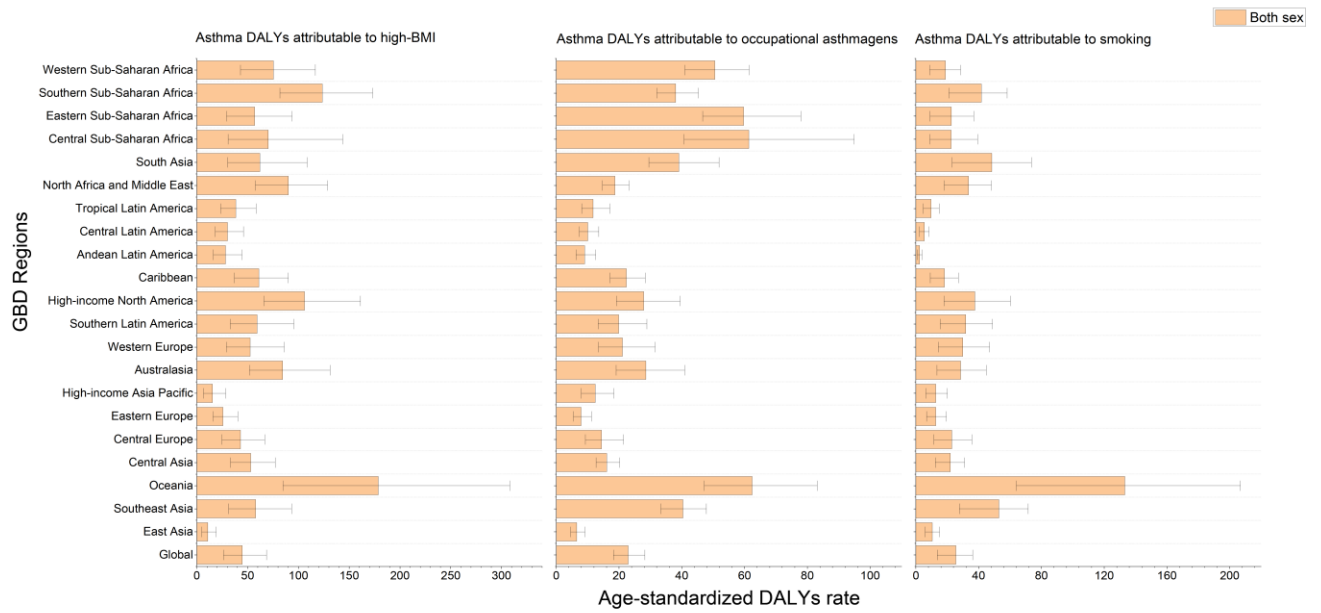

**Figure S20.** Age-standardized disability-adjusted-life-years rate due asthma attributable to risk factors (high-body mass index, occupational asthmagens, and smoking) for 21 GBD regions, by sex, 2019. DALY, disability-adjusted life year.

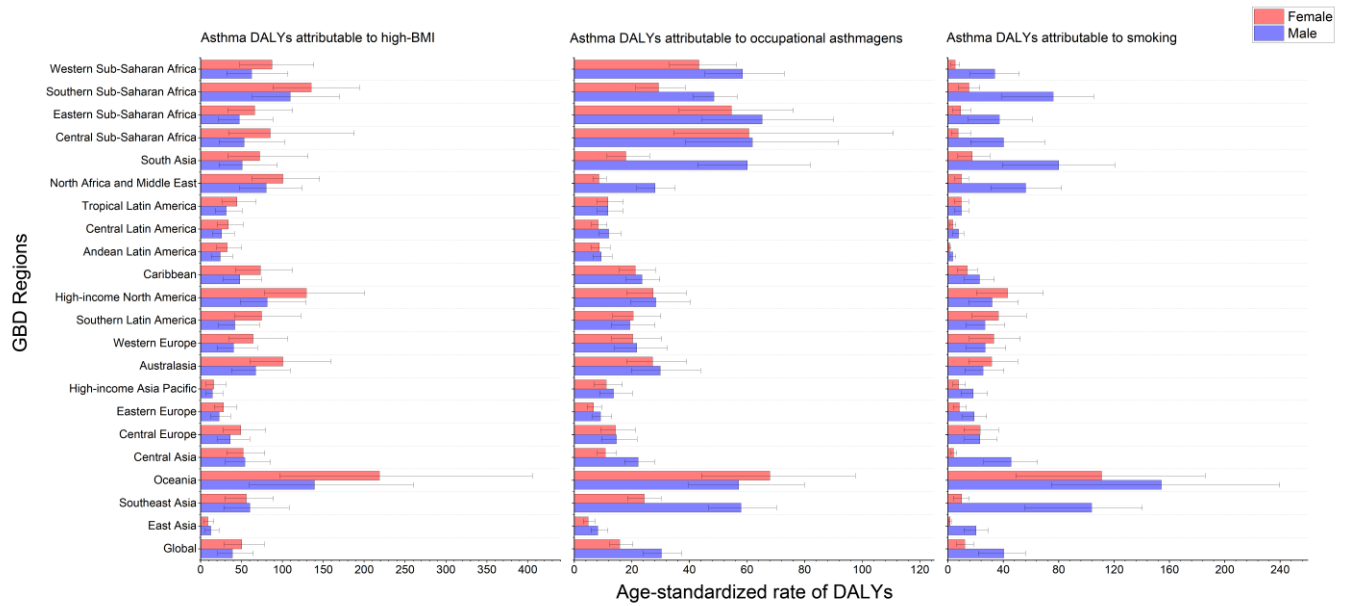

**Figure S21.** Percentage of age-standardized deaths due to asthma attributable to risk factors for 21 GBD regions, both sex, 2019. DALY, disability-adjusted life year.

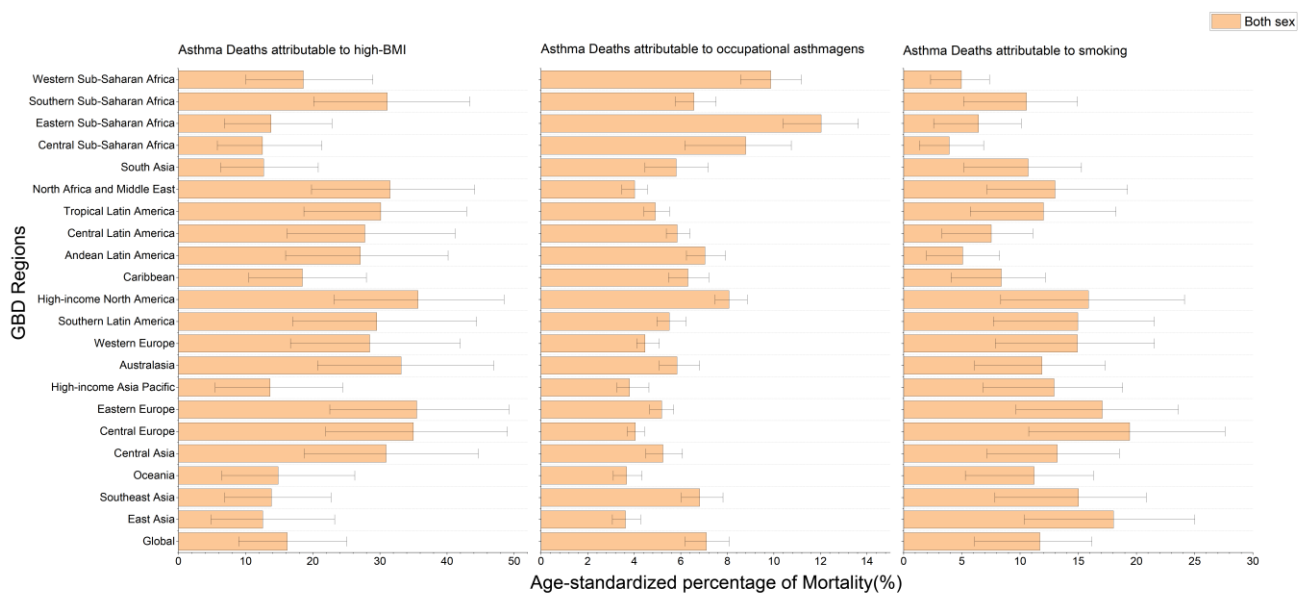

**Figure S22.** Age-standardized mortality rate due asthma attributable to risk factors (high-body mass index, occupational asthmagens, and smoking) for 21 GBD regions, both sex, 2019. DALY, disability-adjusted life year.

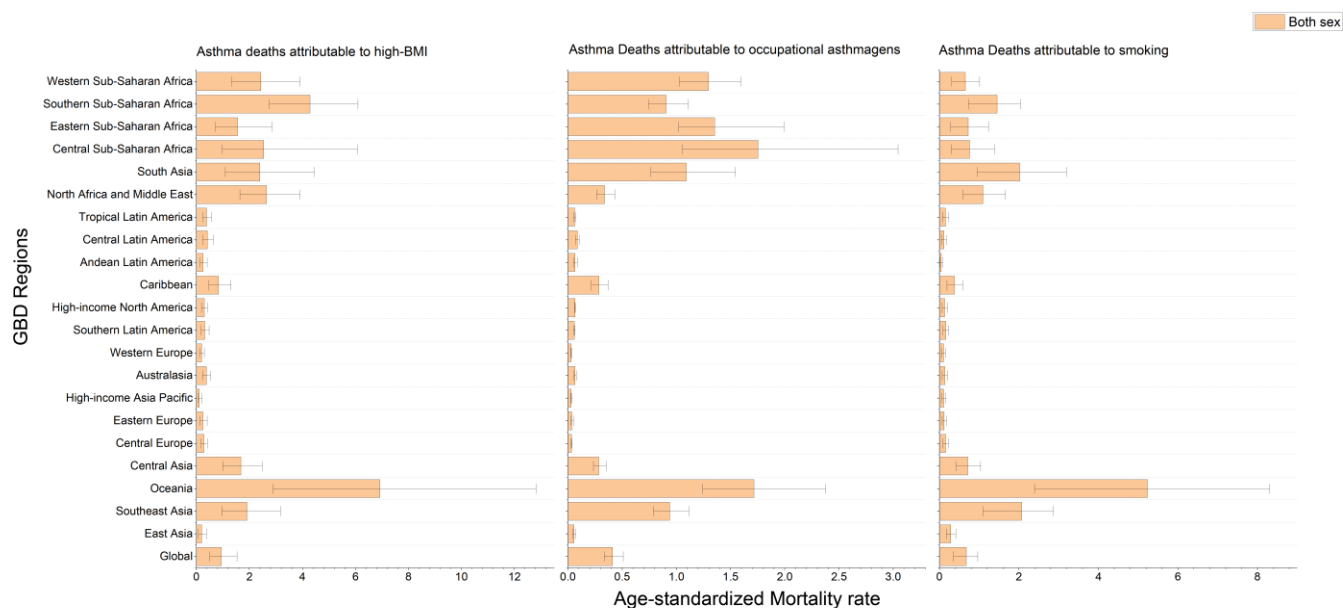

**Figure S23.** Percentage of age-standardized deaths due to asthma attributable to risk factors for 21 GBD regions, by sex, 2019. DALY, disability-adjusted life year.

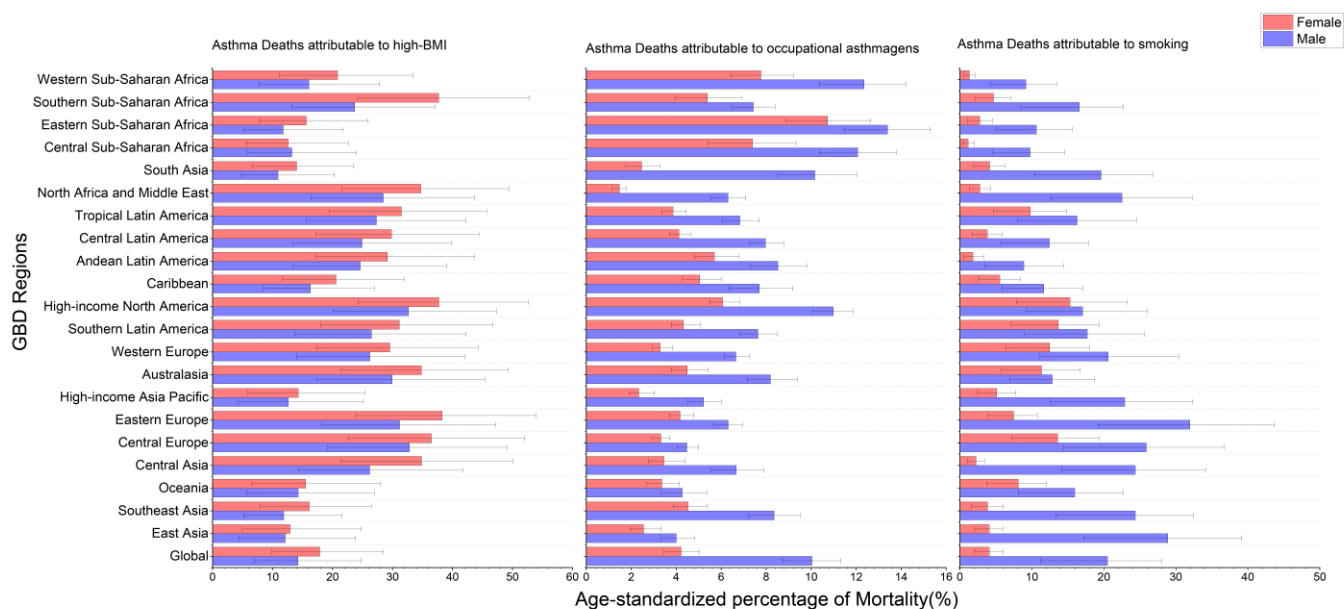

**Figure S24.** Age-standardized mortality rate due asthma attributable to risk factors (high-body mass index, occupational asthmagens, and smoking) for 21 GBD regions, by sex, 2019. DALY, disability-adjusted life year.

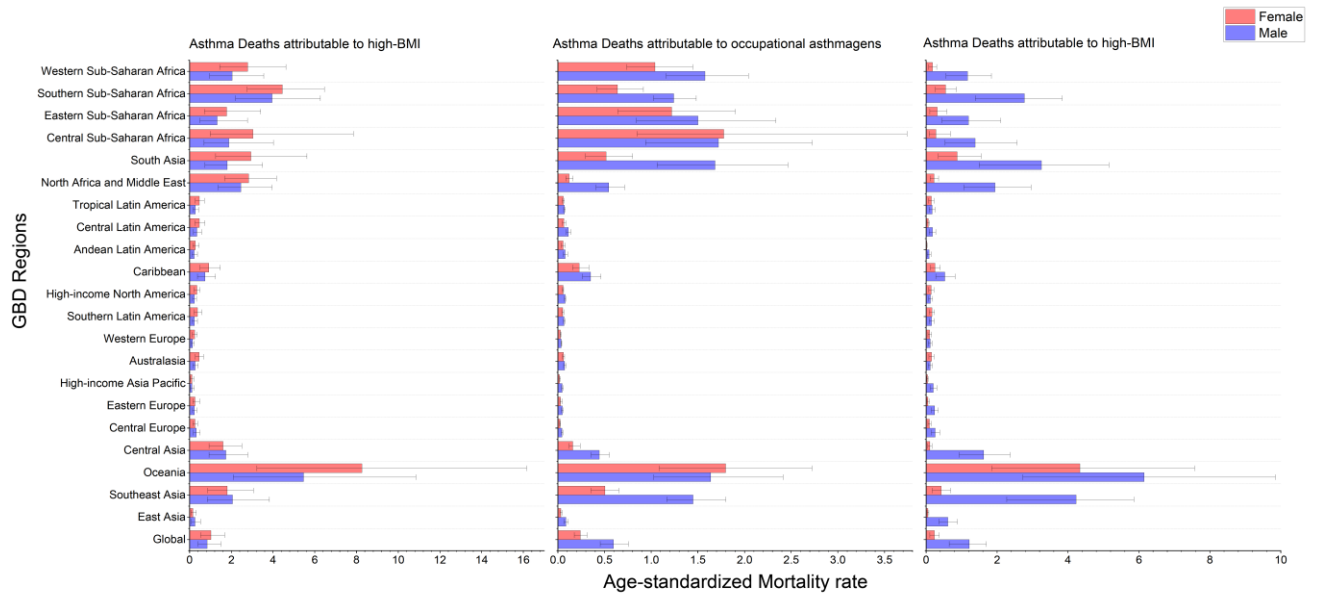

**Figure S25.** All-ages number of disability-adjusted-life-years due to Asthma attributable to high-body mass index (A), occupational asthmagens (B) and smoking (C) for 21 GBD regions, both sex, 2019. DALY, disability-adjusted life year.

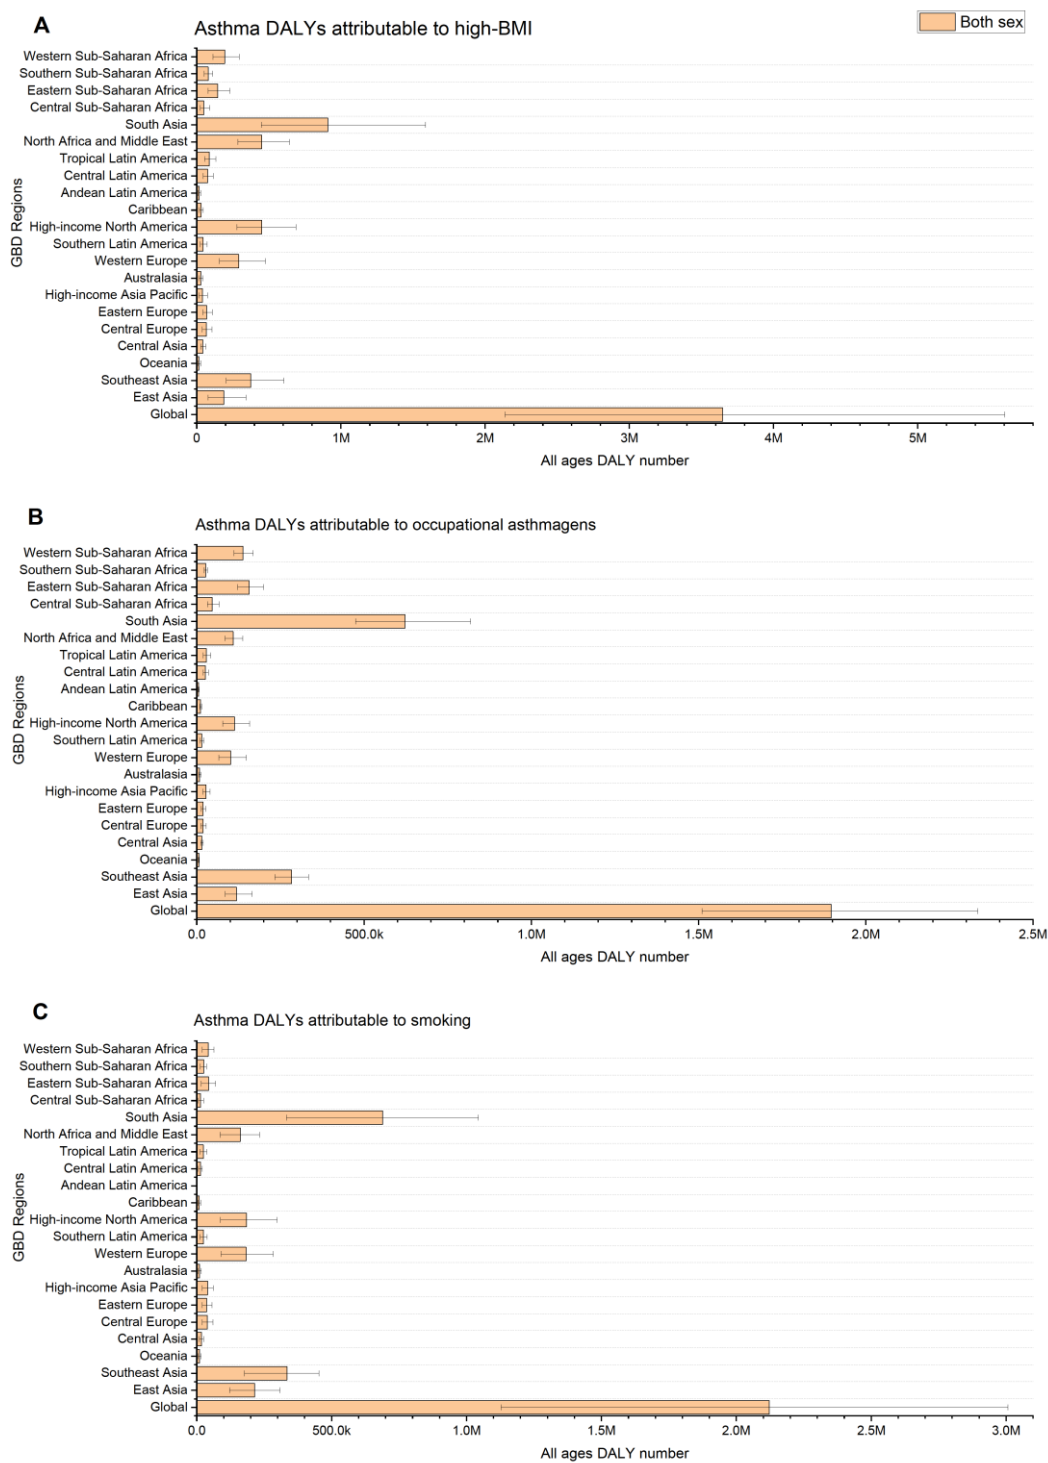

**Figure S26.** All-ages number of disability-adjusted-life-years due to asthma attributable to high-body mass index (A), occupational asthmagens (B) and smoking (C) for 21 GBD regions, both sex, 2019. DALY, disability-adjusted life year.

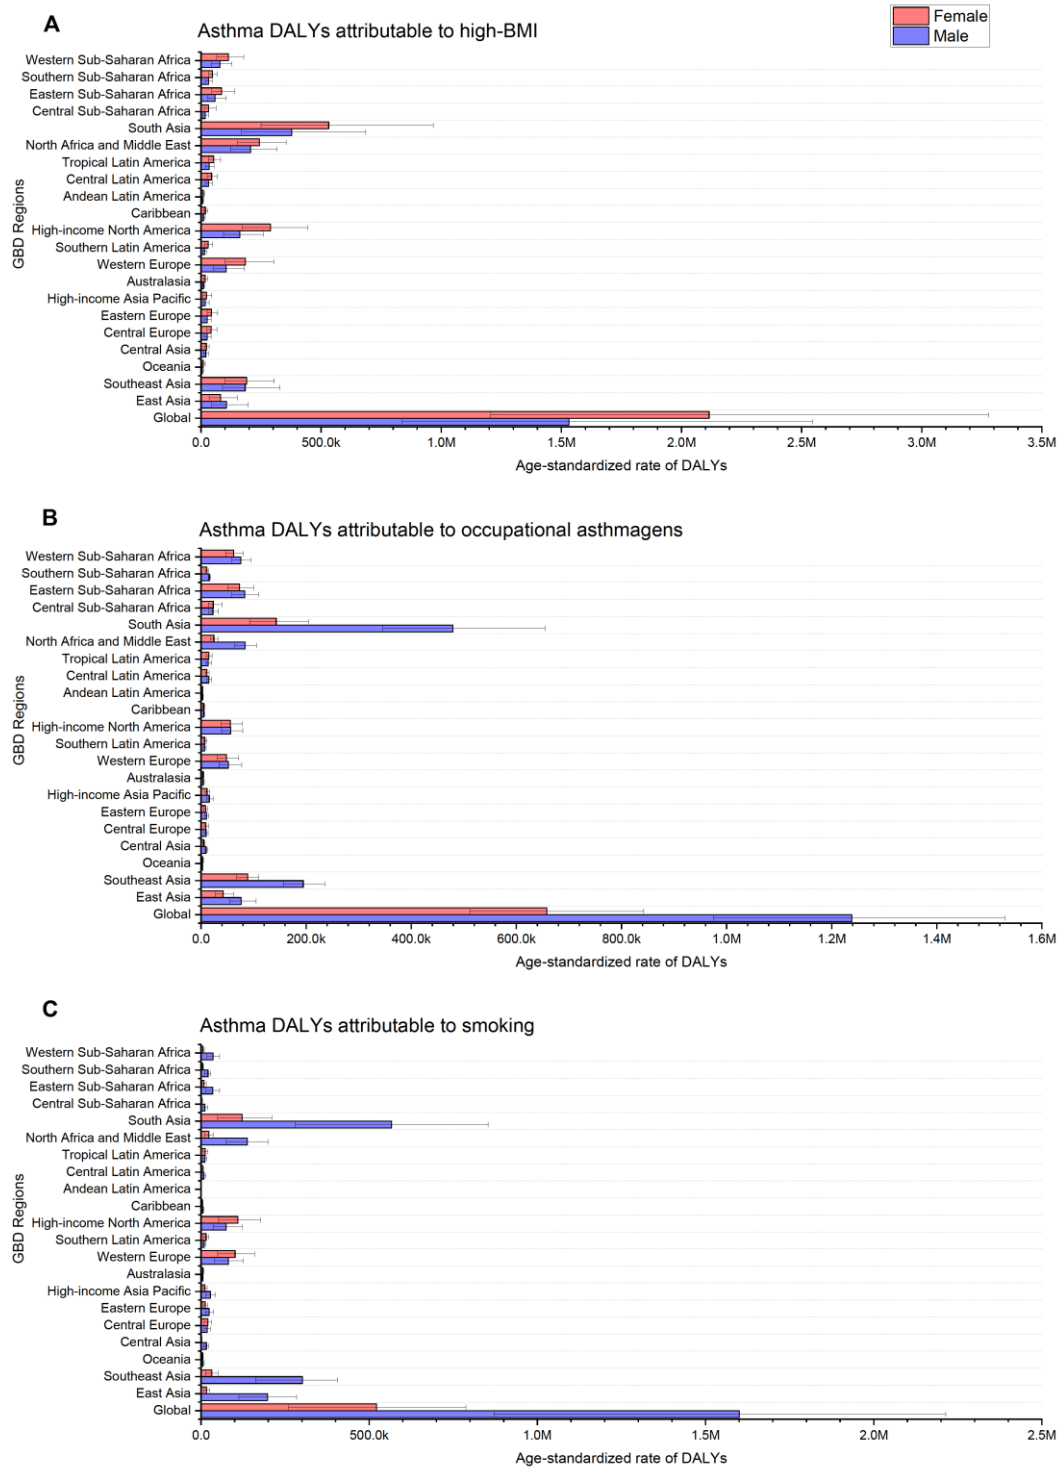



**Figure S27.** All-ages number of deaths due to asthma attributable to high-body mass index (A), occupational asthmagens (B) and smoking (C) for 21 GBD regions, both sex, 2019. DALY, disability-adjusted life year.

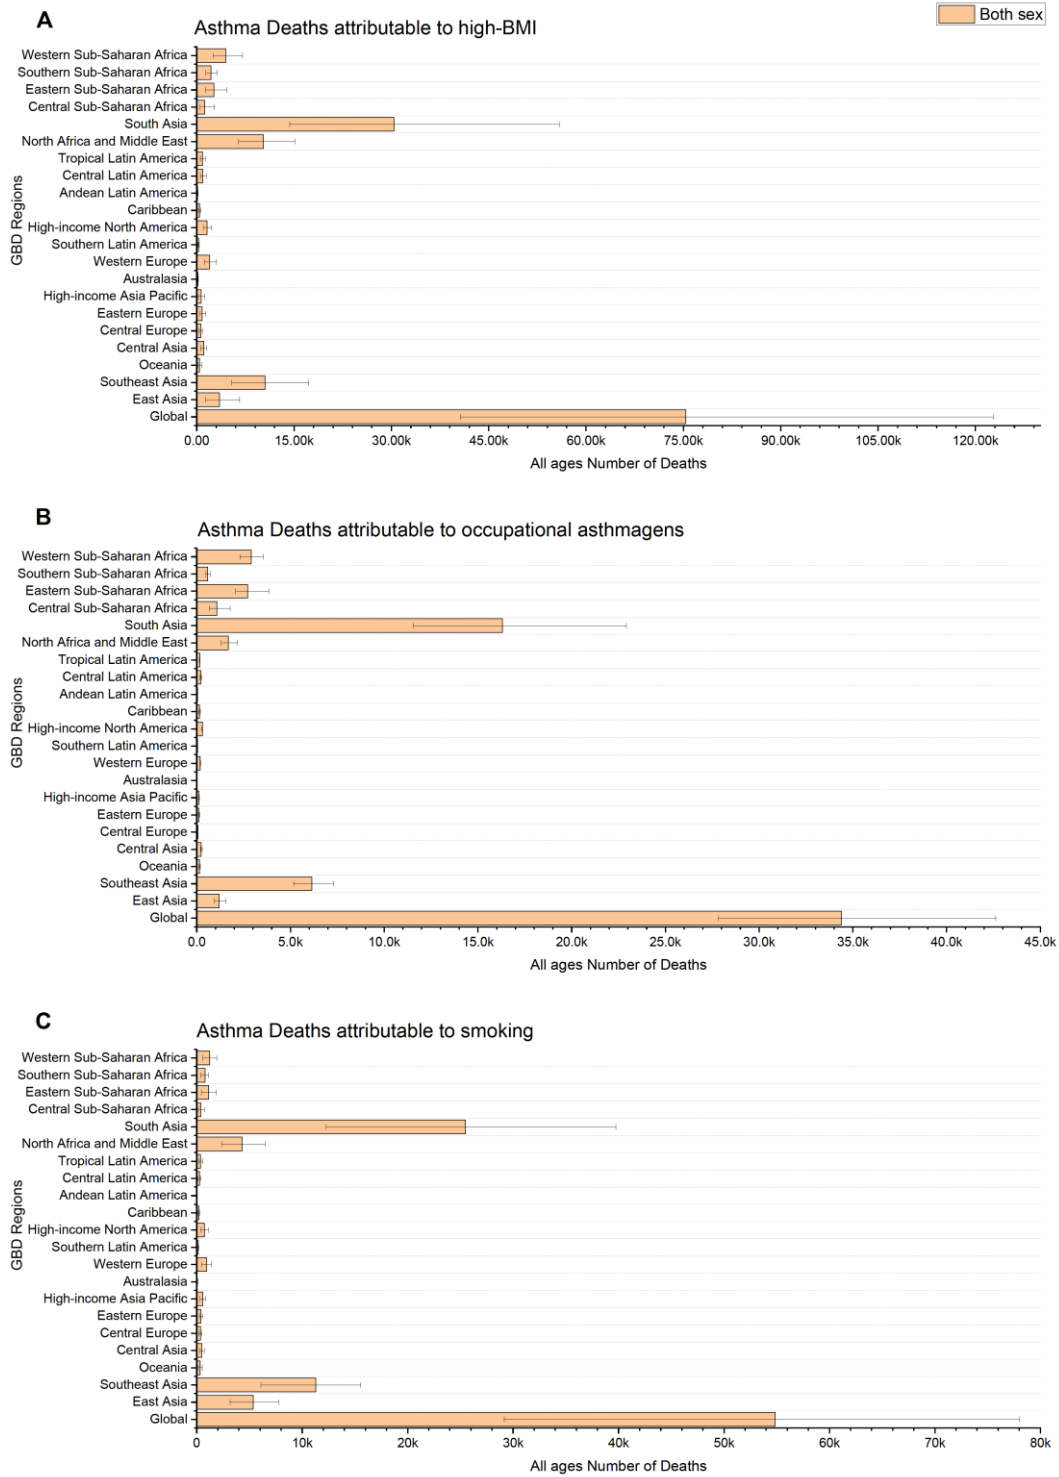

**Figure S28.** All-ages number of deaths due to asthma attributable to high-body mass index (A), occupational asthmagens (B) and smoking (C) for 21 GBD regions, by sex, 2019. DALY, disability-adjusted life year.

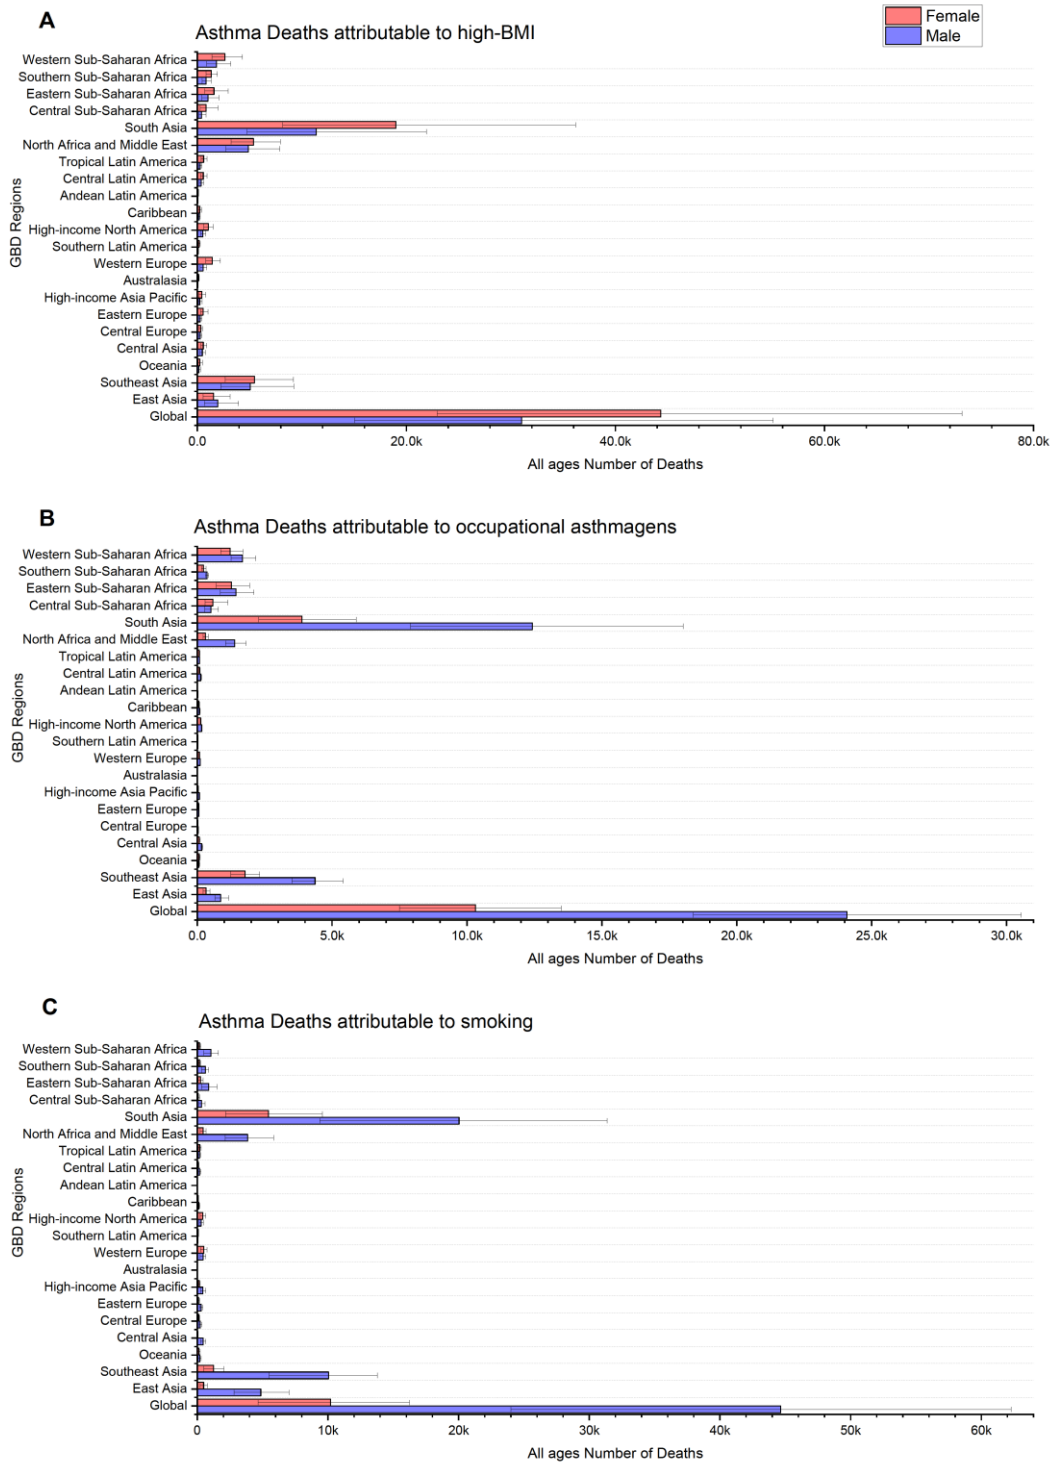

**Table S1.** Incidence rates of asthma in 1990 and 2019 for both sexes and percentage change in age-standardized rates by location.

| Incidence of asthma                   | 1990                            |                         | 2019                            |                         | Percentage change in age-standardized rates between 1990 and 2019 |
|---------------------------------------|---------------------------------|-------------------------|---------------------------------|-------------------------|-------------------------------------------------------------------|
|                                       | Counts (95% UI)                 | Rate (95% UI)           | Counts (95% UI)                 | Rate (95% UI)           |                                                                   |
| Global                                | 32163213<br>(25752792,40513127) | 580.1<br>(474.7,715)    | 36979267<br>(29601976,45928112) | 504.3<br>(400.6,633.3)  | -13.1<br>(-16.3,-10.2)                                            |
| High SDI                              | 6920037<br>(5729678,8410662)    | 933.7<br>(749.5,1169.9) | 7056076<br>(5900059,8406846)    | 897.4<br>(711.3,1111.7) | -3.9<br>(-8,0.6)                                                  |
| High-middle SDI                       | 6242717<br>(5020769,7876345)    | 559.8<br>(446.6,704.4)  | 5373563<br>(4321878,6679208)    | 470.7<br>(356.3,610)    | -15.9<br>(-21.5,-11.3)                                            |
| Low SDI                               | 3763030<br>(2966775,4825345)    | 594.5<br>(491.4,718.6)  | 6557703<br>(5067413,8485553)    | 511.2<br>(415.1,624.6)  | -14<br>(-17,-11)                                                  |
| Low-middle SDI                        | 5682545<br>(4523305,7225234)    | 475.4<br>(395.3,574)    | 6976294<br>(5630627,8633562)    | 409.3<br>(335.6,505.7)  | -13.9<br>(-17.1,-10.8)                                            |
| Middle SDI                            | 9529902<br>(7357881,12466457)   | 523.3<br>(417,662.6)    | 10109155<br>(7964350,12758484)  | 471.8<br>(366.2,607.7)  | -9.9<br>(-12.9,-7)                                                |
| East Asia                             | 4718775<br>(3544699,6361232)    | 400.5<br>(301.2,534)    | 3979880<br>(3082882,5179775)    | 361.2<br>(264.8,499.8)  | -9.8<br>(-14,-6)                                                  |
| China                                 | 4490559<br>(3363512,6071201)    | 394.6<br>(295.4,529.4)  | 3761277<br>(2901080,4917886)    | 355.3<br>(259.7,492.6)  | -9.9<br>(-14.1,-6.3)                                              |
| Democratic People's Republic of Korea | 118674<br>(91746,154172)        | 542.6<br>(426.5,688.8)  | 125030<br>(104366,149850)       | 534.7<br>(427.3,669.8)  | -1.5<br>(-12.3,5.4)                                               |
| Taiwan (Province of China)            | 109542<br>(89621,138262)        | 581.1<br>(467.2,733.1)  | 93573<br>(77453,114413)         | 543.6<br>(414.2,731.2)  | -6.5<br>(-18.8,9.3)                                               |
| Southeast Asia                        | 2894847<br>(2306202,3676835)    | 576.9<br>(474.5,709.4)  | 3450998<br>(2810277,4271027)    | 553.4<br>(445.7,698.1)  | -4.1<br>(-7.3,-0.8)                                               |
| Cambodia                              | 48263<br>(36532,62561)          | 375<br>(302.6,460.9)    | 69235<br>(54268,89011)          | 414.9<br>(329.4,526)    | 10.6<br>(3.2,20.2)                                                |
| Indonesia                             | 1144668<br>(911938,1458820)     | 583.4<br>(477.7,717.1)  | 1309435<br>(1067022,1619267)    | 544.9<br>(437,681.9)    | -6.6<br>(-11.3,-1.8)                                              |
| Lao People's                          | 21011                           | 417.3                   | 26664                           | 368.9                   | -11.6                                                             |

|                                        |                           |                         |                            |                        |                        |
|----------------------------------------|---------------------------|-------------------------|----------------------------|------------------------|------------------------|
| Democratic Republic                    | (16474,26343)             | (345.4,504.4)           | (21626,33304)              | (303.6,453.8)          | (-18.1,-4.8)           |
| Malaysia                               | 89348<br>(72675,110475)   | 480.7<br>(403,575.6)    | 125336<br>(100251,162124)  | 433.5<br>(339.2,569.3) | -9.8<br>(-21.6,3.6)    |
| Maldives                               | 1807<br>(1399,2359)       | 595.3<br>(485,737.9)    | 1802<br>(1385,2325)        | 421.6<br>(319.9,549.8) | -29.2<br>(-39.5,-17.3) |
| Myanmar                                | 163560<br>(135057,200507) | 384.9<br>(329.6,452.6)  | 187024<br>(158584,224646)  | 358.3<br>(303.3,431.6) | -6.9<br>(-12.6,-1)     |
| Philippines                            | 700810<br>(541729,932067) | 904.9<br>(720.3,1162.3) | 880783<br>(690740,1142589) | 742.7<br>(591,952.7)   | -17.9<br>(-20.4,-15.2) |
| Sri Lanka                              | 86653<br>(71565,105206)   | 541.3<br>(459,635.7)    | 119666<br>(102098,140634)  | 563.8<br>(474.8,681.3) | 4.2<br>(-2.5,12.3)     |
| Thailand                               | 305923<br>(251864,375467) | 561.7<br>(471,678.2)    | 294343<br>(245694,351332)  | 535.4<br>(419.9,686.4) | -4.7<br>(-14.9,6.4)    |
| Timor-Leste                            | 5259<br>(4112,6728)       | 526.9<br>(431.2,643.7)  | 7320<br>(5804,9235)        | 483.9<br>(396,593.9)   | -8.2<br>(-15.3,-0.9)   |
| Viet Nam                               | 316948<br>(242714,415096) | 422.5<br>(341.3,529)    | 419716<br>(345209,519094)  | 485.6<br>(391.9,612.7) | 14.9<br>(9.1,20.4)     |
| Mauritius                              | 6436<br>(5210,7887)       | 620<br>(510.6,749.5)    | 4778<br>(3979,5700)        | 464.7<br>(366.2,586.5) | -25.1<br>(-31.7,-17.3) |
| Seychelles                             | 312<br>(247,396)          | 407.5<br>(326.9,511.6)  | 375<br>(303,473)           | 423.4<br>(332,546.1)   | 3.9<br>(-2.2,9.7)      |
| Oceania                                | 53282<br>(43278,65083)    | 781.1<br>(662.5,910.5)  | 91492<br>(76089,110025)    | 665.4<br>(567.7,777.3) | -14.8<br>(-18.7,-10.7) |
| Fiji                                   | 5226<br>(4294,6363)       | 710.9<br>(606.5,830.2)  | 4774<br>(3952,5864)        | 540.3<br>(451.1,655.5) | -24<br>(-29.3,-18.4)   |
| Kiribati                               | 706<br>(587,846)          | 886.3<br>(756.9,1029.8) | 829<br>(700,989)           | 696.8<br>(599.5,812.2) | -21.4<br>(-26.5,-16.4) |
| Marshall Islands                       | 317<br>(249,399)          | 598.9<br>(507.6,704)    | 294<br>(230,369)           | 511.1<br>(407.5,635.3) | -14.7<br>(-24.4,-4.3)  |
| Micronesia<br>(Federated States<br>of) | 696<br>(549,860)          | 592.6<br>(493.8,699.6)  | 533<br>(410,671)           | 528<br>(411.2,662.6)   | -10.9<br>(-21.4,1.6)   |
| Papua New Guinea                       | 36551                     | 847.8                   | 71436                      | 704.2                  | -16.9                  |

|                          |                           |                        |                           |                        |                       |
|--------------------------|---------------------------|------------------------|---------------------------|------------------------|-----------------------|
|                          | (29776,44187)             | (717.8,982.7)          | (59528,85258)             | (603.9,818.1)          | (-21.6,-12.3)         |
| Samoa                    | 992<br>(781,1250)         | 555.9<br>(455.3,675.2) | 1104<br>(840,1436)        | 498.7<br>(391,635.6)   | -10.3<br>(-17.4,1.1)  |
| Solomon Islands          | 2291<br>(1763,2898)       | 593.8<br>(488.6,708.4) | 4079<br>(3155,5349)       | 567.4<br>(455.1,713.7) | -4.5<br>(-15,5.4)     |
| Tonga                    | 740<br>(571,972)          | 683.3<br>(555.5,857.7) | 665<br>(507,862)          | 599.1<br>(467.9,762.3) | -12.3<br>(-18.4,-3.7) |
| Vanuatu                  | 949<br>(744,1195)         | 549.7<br>(454.6,656.1) | 1674<br>(1182,2220)       | 524.6<br>(380.2,684.9) | -4.6<br>(-24.3,12.6)  |
| American Samoa           | 318<br>(240,420)          | 579.9<br>(458.9,737.8) | 314<br>(235,407)          | 568.9<br>(421.2,728.7) | -1.9<br>(-14.9,10.1)  |
| Cook Islands             | 131<br>(100,174)          | 639.2<br>(489.1,822.4) | 98<br>(72,125)            | 598.5<br>(449.4,767.9) | -6.4<br>(-12.3,3)     |
| Guam                     | 893<br>(675,1176)         | 641.1<br>(487.1,834.3) | 940<br>(704,1224)         | 570.2<br>(425.3,746.4) | -11.1<br>(-15.9,-6.1) |
| Nauru                    | 68<br>(52,88)             | 561.5<br>(453.5,688.4) | 63<br>(47,84)             | 548.6<br>(421.3,712.8) | -2.3<br>(-16.7,10.3)  |
| Niue                     | 15<br>(11,20)             | 586.6<br>(457.6,755.7) | 9<br>(7,12)               | 583.2<br>(438.7,746.6) | -0.6<br>(-10.4,8.6)   |
| Northern Mariana Islands | 276<br>(214,354)          | 648.4<br>(505.8,829.6) | 200<br>(151,254)          | 594.5<br>(451.5,780.4) | -8.3<br>(-15.5,1.9)   |
| Palau                    | 98<br>(77,122)            | 637.7<br>(507.4,784.6) | 82<br>(66,100)            | 557.9<br>(435.9,704.4) | -12.5<br>(-17.5,-6.6) |
| Tokelau                  | 12<br>(8,16)              | 565.3<br>(421.4,742.4) | 9<br>(7,12)               | 580.1<br>(431.6,744.2) | 2.6<br>(-11.8,22.2)   |
| Tuvalu                   | 53<br>(42,66)             | 520.1<br>(422.4,631.8) | 66<br>(49,85)             | 573.6<br>(426,734.6)   | 10.3<br>(-14.6,24.8)  |
| Central Asia             | 299599<br>(232086,389478) | 406.4<br>(328.1,503.3) | 353674<br>(272735,459839) | 379.3<br>(293.2,489.2) | -6.7<br>(-12.7,-1.1)  |
| Armenia                  | 11792<br>(8825,15398)     | 333.7<br>(253.2,432.4) | 9170<br>(6954,11748)      | 352.2<br>(257.3,462.2) | 5.6<br>(-5.1,13.3)    |
| Azerbaijan               | 27166<br>(20647,35719)    | 352<br>(275.4,451.5)   | 31120<br>(24185,39603)    | 343.4<br>(261.9,445.7) | -2.4<br>(-7.8,2.9)    |
| Georgia                  | 18200                     | 343.5                  | 10669                     | 342.5                  | -0.3                  |

|                           |                            |                          |                           |                         |                        |
|---------------------------|----------------------------|--------------------------|---------------------------|-------------------------|------------------------|
|                           | (15030,22577)              | (279.1,431.3)            | (8371,13595)              | (257.8,452.2)           | (-11.8,14.4)           |
| Kazakhstan                | 46707<br>(35961,59441)     | 279.7<br>(219.9,350.8)   | 51667<br>(39763,66586)    | 285.9<br>(219.4,366.7)  | 2.2<br>(-5.7,9.6)      |
| Kyrgyzstan                | 22756<br>(17759,29523)     | 476.7<br>(388.5,594.2)   | 27312<br>(20367,36254)    | 394.3<br>(299.1,513.7)  | -17.3<br>(-25.7,-9.6)  |
| Mongolia                  | 9204<br>(6939,12103)       | 408.3<br>(332.1,498.6)   | 12167<br>(9209,16024)     | 361.3<br>(279.7,462.2)  | -11.5<br>(-19,-4.7)    |
| Tajikistan                | 24037<br>(17713,31916)     | 407.1<br>(325.4,503.3)   | 37084<br>(27174,49748)    | 385.3<br>(297.3,491.3)  | -5.3<br>(-11.8,0.9)    |
| Turkmenistan              | 18128<br>(13972,23927)     | 432.4<br>(352.2,540.6)   | 17965<br>(13165,24197)    | 344.5<br>(254.9,456.3)  | -20.3<br>(-32.2,-11.3) |
| Uzbekistan                | 121609<br>(93738,156959)   | 560.8<br>(455,686)       | 156519<br>(121361,202861) | 469.1<br>(372.2,595.3)  | -16.3<br>(-24.1,-8.6)  |
| Central Europe            | 860511<br>(723121,1034183) | 714.1<br>(592.9,873.9)   | 586970<br>(486653,704768) | 617<br>(483.3,790)      | -13.6<br>(-20.3,-7.6)  |
| Albania                   | 13983<br>(11277,17833)     | 418.2<br>(350.5,518.1)   | 11128<br>(9289,13443)     | 453.3<br>(361.8,573.3)  | 8.4<br>(-2.5,22.2)     |
| Bosnia and<br>Herzegovina | 27549<br>(22584,33810)     | 638.8<br>(518.9,795.3)   | 18567<br>(15591,22069)    | 636.8<br>(506.8,806.6)  | -0.3<br>(-5.8,4.9)     |
| Bulgaria                  | 47566<br>(39626,56988)     | 580.5<br>(475.6,716.1)   | 29693<br>(24391,35437)    | 535.9<br>(418.3,677.4)  | -7.7<br>(-14.5,-0.5)   |
| Croatia                   | 33293<br>(27579,39628)     | 694.9<br>(562.9,854.7)   | 21661<br>(18388,25717)    | 585.7<br>(465.7,736.9)  | -15.7<br>(-22.5,-8.9)  |
| Czechia                   | 43446<br>(34824,53283)     | 471.5<br>(370.2,598.7)   | 40127<br>(32774,48307)    | 472.3<br>(368.4,605.3)  | 0.2<br>(-5.7,5.2)      |
| Hungary                   | 52953<br>(43611,63131)     | 560<br>(450.3,694.9)     | 37786<br>(31130,45481)    | 501.4<br>(392.6,635.7)  | -10.5<br>(-16.8,-3.7)  |
| North Macedonia           | 16818<br>(13381,20945)     | 848.1<br>(674.9,1056.6)  | 14379<br>(12304,16608)    | 709.2<br>(584.5,868.1)  | -16.4<br>(-26.2,-3.2)  |
| Montenegro                | 2984<br>(2334,3744)        | 495<br>(385.2,630.4)     | 2844<br>(2285,3542)       | 537.9<br>(421.2,693.1)  | 8.7<br>(1.7,16.2)      |
| Poland                    | 404892<br>(337325,483495)  | 1065.3<br>(883.6,1281.6) | 248710<br>(204209,303393) | 780.7<br>(606.6,1005.2) | -26.7<br>(-34.9,-18.3) |
| Romania                   | 137397                     | 597.2                    | 96468                     | 601.6                   | 0.7                    |

|                             |                              |                         |                           |                        |                        |
|-----------------------------|------------------------------|-------------------------|---------------------------|------------------------|------------------------|
|                             | (112170,169647)              | (481.5,757.8)           | (78601,118131)            | (468.9,768.9)          | (-9.8,14.2)            |
| Serbia                      | 42740<br>(35775,51420)       | 483.1<br>(391.9,598.8)  | 34347<br>(28904,40784)    | 451.5<br>(356.4,571.5) | -6.5<br>(-12,-0.6)     |
| Slovakia                    | 22833<br>(18404,28240)       | 455.7<br>(361.6,574.8)  | 19981<br>(16346,24301)    | 455.8<br>(355.3,579.1) | 0<br>(-5.4,5.9)        |
| Slovenia                    | 14056<br>(11860,16795)       | 748.6<br>(617.6,914)    | 11279<br>(9385,13555)     | 645.4<br>(509.4,818.2) | -13.8<br>(-21.1,-7.7)  |
| Eastern Europe              | 1433382<br>(1159698,1770626) | 655.1<br>(519.7,826.4)  | 755273<br>(586070,966281) | 461.9<br>(338.7,613.6) | -29.5<br>(-36.3,-23)   |
| Belarus                     | 70196<br>(57661,85639)       | 685<br>(551.4,845.2)    | 42427<br>(34444,52940)    | 534.8<br>(406.6,698.1) | -21.9<br>(-29.6,-14.9) |
| Estonia                     | 6300<br>(5202,7513)          | 431.5<br>(346.9,525.6)  | 3679<br>(2963,4523)       | 363.1<br>(270.1,473)   | -15.9<br>(-27.4,-4.3)  |
| Latvia                      | 15608<br>(13271,18346)       | 610.4<br>(512.4,743)    | 7692<br>(6238,9424)       | 508.6<br>(382.3,659.9) | -16.7<br>(-29.2,-2.7)  |
| Lithuania                   | 16534<br>(13646,19801)       | 469.5<br>(379.2,579.8)  | 9591<br>(7695,11731)      | 448.7<br>(333.4,581.3) | -4.4<br>(-17.8,12.4)   |
| Republic of<br>Moldova      | 23650<br>(18894,30030)       | 530.2<br>(421.2,676.8)  | 12857<br>(10117,16200)    | 453.5<br>(339.6,600.8) | -14.5<br>(-22.9,-5.5)  |
| Russian Federation          | 977005<br>(798115,1207341)   | 658<br>(527.1,833.1)    | 507709<br>(393295,649532) | 434.1<br>(319.4,576)   | -34<br>(-41.1,-27.2)   |
| Ukraine                     | 324089<br>(253447,407276)    | 682.8<br>(515.1,875.3)  | 171318<br>(130593,221689) | 552.7<br>(398.9,743.6) | -19.1<br>(-25.7,-11.3) |
| High-income Asia<br>Pacific | 1371250<br>(1152445,1646704) | 852.9<br>(707.5,1042.3) | 795949<br>(663981,951354) | 554.5<br>(421.1,724.3) | -35<br>(-41.6,-28.6)   |
| Brunei Darussalam           | 1621<br>(1266,2082)          | 669.8<br>(547.8,827.4)  | 2225<br>(1794,2741)       | 622.6<br>(504.2,773.6) | -7.1<br>(-12.3,-1.1)   |
| Japan                       | 1125260<br>(945376,1347003)  | 963.1<br>(785.4,1201.2) | 561688<br>(467115,676760) | 584.1<br>(439.7,775.3) | -39.4<br>(-45.4,-33.8) |
| Republic of Korea           | 225485<br>(186171,274992)    | 586.9<br>(486.5,715.5)  | 211096<br>(177800,250593) | 510.5<br>(400.5,652.9) | -13<br>(-24.8,0.2)     |
| Singapore                   | 18885<br>(15740,22491)       | 693.9<br>(575.2,830.6)  | 20940<br>(17119,25927)    | 500.4<br>(386.2,653.5) | -27.9<br>(-38.2,-15.6) |
| Australasia                 | 137909                       | 784.2                   | 139912                    | 615.2                  | -21.6                  |

|                |                              |                         |                              |                        |                        |
|----------------|------------------------------|-------------------------|------------------------------|------------------------|------------------------|
|                | (110796,166316)              | (622.4,957.4)           | (111577,175051)              | (473.2,790.7)          | (-33.6,-7.6)           |
| Australia      | 107870<br>(85156,130818)     | 748.6<br>(585.4,918.1)  | 115111<br>(91823,143929)     | 598.7<br>(458.2,769.6) | -20<br>(-34.5,-2.7)    |
| New Zealand    | 30039<br>(23956,37292)       | 967.2<br>(754.3,1222.8) | 24801<br>(19022,31981)       | 702.5<br>(520.3,936.8) | -27.4<br>(-34.1,-20.4) |
| Western Europe | 2251292<br>(1922884,2628385) | 627.6<br>(526.7,750.6)  | 1785531<br>(1472143,2130570) | 512.2<br>(397.3,640.6) | -18.4<br>(-25.9,-12.1) |
| Andorra        | 237<br>(193,288)             | 525.7<br>(417.3,655.6)  | 294<br>(237,357)             | 484.2<br>(375,612)     | -7.9<br>(-13.4,-2.4)   |
| Austria        | 37442<br>(31564,44051)       | 525.1<br>(439.6,633.3)  | 31023<br>(25355,37384)       | 449.8<br>(351.5,563)   | -14.3<br>(-24.7,-4)    |
| Belgium        | 51973<br>(44031,61440)       | 547.3<br>(461.7,657.8)  | 38372<br>(30877,46541)       | 417.3<br>(322.3,519.5) | -23.7<br>(-34.8,-12.5) |
| Cyprus         | 4223<br>(3409,5168)          | 568.6<br>(456.9,703.7)  | 5904<br>(4824,7170)          | 546.5<br>(432.1,683.4) | -3.9<br>(-9.7,2.5)     |
| Denmark        | 24837<br>(21105,29236)       | 549.9<br>(450.7,675.3)  | 21389<br>(17118,26111)       | 467.9<br>(359.2,597.2) | -14.9<br>(-23.4,-5.4)  |
| Finland        | 21654<br>(17981,25795)       | 487.4<br>(396.7,601.1)  | 21422<br>(17782,25614)       | 456.9<br>(361.7,567.1) | -6.3<br>(-13.6,1.4)    |
| France         | 358433<br>(306546,423696)    | 646.6<br>(544.9,786.6)  | 296162<br>(244156,357363)    | 522.4<br>(410.4,651.3) | -19.2<br>(-28.8,-8.3)  |
| Germany        | 426768<br>(350281,492725)    | 558.7<br>(465.3,660.9)  | 246835<br>(201445,300847)    | 391<br>(300.5,495.4)   | -30<br>(-41.6,-18.6)   |
| Greece         | 45512<br>(37481,54777)       | 464.1<br>(378.4,575.6)  | 36458<br>(29722,43718)       | 451.8<br>(352.3,563.8) | -2.6<br>(-12.8,11.3)   |
| Iceland        | 2045<br>(1646,2502)          | 857.9<br>(676.2,1065.5) | 2045<br>(1644,2531)          | 695.5<br>(545.9,881.7) | -18.9<br>(-30.1,-9)    |
| Ireland        | 24567<br>(20137,29875)       | 693.7<br>(571.8,838.8)  | 22572<br>(17932,27554)       | 535.5<br>(420.3,664.3) | -22.8<br>(-31.5,-14.3) |
| Israel         | 26386<br>(20991,32364)       | 519.5<br>(420.4,637.8)  | 40691<br>(31597,50555)       | 439.7<br>(339.1,549)   | -15.4<br>(-22.3,-8.7)  |
| Italy          | 305423<br>(255392,360502)    | 522.3<br>(430.4,634.4)  | 207135<br>(166868,249393)    | 447.7<br>(330.7,574.7) | -14.3<br>(-26.3,-1.1)  |
| Luxembourg     | 2126                         | 639                     | 2627                         | 526.3                  | -17.6                  |



|                           |                              |                         |                              |                           |                        |
|---------------------------|------------------------------|-------------------------|------------------------------|---------------------------|------------------------|
|                           | (1751,2793)                  | (508.8,819.8)           | (2167,3167)                  | (409.9,657.8)             | (-30.9,-11)            |
| Malta                     | 2268<br>(1908,2665)          | 630.6<br>(528.1,754)    | 1954<br>(1612,2344)          | 543.1<br>(427.6,676)      | -13.9<br>(-24.1,-2.4)  |
| Netherlands               | 49068<br>(41428,57168)       | 363.7<br>(303.2,436.5)  | 49024<br>(40777,57277)       | 332.7<br>(270.5,401.5)    | -8.5<br>(-16.7,5.6)    |
| Norway                    | 35454<br>(29475,42022)       | 901.4<br>(738,1101.3)   | 28099<br>(22567,34592)       | 650.2<br>(498.3,826.9)    | -27.9<br>(-36.3,-20.3) |
| Portugal                  | 70880<br>(58660,86166)       | 724.6<br>(601,891.2)    | 54441<br>(45601,63883)       | 636.3<br>(503.8,787.3)    | -12.2<br>(-22.1,-1)    |
| Spain                     | 164254<br>(134983,198520)    | 447.1<br>(361.7,556.6)  | 173292<br>(142545,207590)    | 463.7<br>(364.7,581.1)    | 3.7<br>(-6.6,17.6)     |
| Sweden                    | 69111<br>(57306,81250)       | 839.7<br>(688.1,1029.8) | 52430<br>(42260,64149)       | 611.4<br>(467.1,789.5)    | -27.2<br>(-35.6,-19.2) |
| Switzerland               | 37615<br>(31627,44284)       | 620.7<br>(503.8,761.1)  | 36015<br>(29402,43182)       | 525.1<br>(411.5,668.6)    | -15.4<br>(-23.7,-6.8)  |
| United Kingdom            | 488938<br>(403446,586816)    | 989.3<br>(792.5,1209.4) | 415532<br>(338537,506097)    | 757<br>(585.5,955.3)      | -23.5<br>(-27.7,-19.2) |
| Monaco                    | 111<br>(92,134)              | 497.4<br>(389.2,632.6)  | 136<br>(111,164)             | 486.7<br>(373.1,614.4)    | -2.1<br>(-7.6,3.8)     |
| San Marino                | 99<br>(80,122)               | 483<br>(379.6,607.4)    | 125<br>(100,153)             | 479.2<br>(369,607.1)      | -0.8<br>(-6.3,5.2)     |
| Southern Latin America    | 368390<br>(307660,451220)    | 729.2<br>(612.4,887.3)  | 453729<br>(370284,559750)    | 742.3<br>(592.4,935.5)    | 1.8<br>(-7.5,12.8)     |
| Argentina                 | 258500<br>(214737,317352)    | 760.9<br>(633.9,926.7)  | 326712<br>(263862,406380)    | 781.4<br>(620.9,986.4)    | 2.7<br>(-7.6,16.1)     |
| Chile                     | 86681<br>(70648,107853)      | 653.4<br>(540,801)      | 105914<br>(86981,129139)     | 645.8<br>(514.7,820.6)    | -1.2<br>(-10.1,10.1)   |
| Uruguay                   | 23194<br>(19260,28100)       | 754.1<br>(620.2,925)    | 21081<br>(17308,25812)       | 691.2<br>(549.7,873.4)    | -8.3<br>(-16.5,0.1)    |
| High-income North America | 3368771<br>(2678501,4315052) | 1351.7<br>(1039,1769.4) | 4366448<br>(3653279,5207636) | 1474.1<br>(1188.9,1810.7) | 9.1<br>(-0.9,19.2)     |
| Canada                    | 201721<br>(164225,248004)    | 845.8<br>(671.6,1070.3) | 222741<br>(183176,270681)    | 783.8<br>(611.3,994.7)    | -7.3<br>(-19.8,1.2)    |
| United States of          | 3166265                      | 1404.6                  | 4143124                      | 1547.2                    | 10.2                   |

|                                  |                           |                           |                           |                          |                        |
|----------------------------------|---------------------------|---------------------------|---------------------------|--------------------------|------------------------|
| America                          | (2518593,4064450)         | (1077.5,1842.9)           | (3475553,4948182)         | (1251.2,1899.9)          | (-0.7,21.1)            |
| Greenland                        | 707<br>(563,882)          | 1352.1<br>(1083.8,1687.1) | 513<br>(428,625)          | 1017.3<br>(827.8,1276.1) | -24.8<br>(-31.8,-15.3) |
| Caribbean                        | 396154<br>(314621,493778) | 1008.2<br>(804.9,1253.6)  | 403255<br>(321534,502347) | 938.4<br>(741.7,1179)    | -6.9<br>(-11.3,-3)     |
| Antigua and Barbuda              | 566<br>(437,743)          | 875.3<br>(676,1143.7)     | 611<br>(474,769)          | 918.5<br>(699,1177.5)    | 4.9<br>(-1,10.9)       |
| Bahamas                          | 2410<br>(1866,3139)       | 882.2<br>(685.4,1145.2)   | 2711<br>(2100,3430)       | 918.1<br>(697.4,1185.1)  | 4.1<br>(-3.3,11.5)     |
| Barbados                         | 2226<br>(1794,2781)       | 951<br>(764.2,1192.8)     | 2186<br>(1771,2699)       | 1028.3<br>(795.4,1318.2) | 8.1<br>(-2.6,22.5)     |
| Belize                           | 2423<br>(1841,3105)       | 948.6<br>(740.7,1194.6)   | 3835<br>(2948,4888)       | 906.6<br>(693.5,1157.8)  | -4.4<br>(-12.9,4)      |
| Cuba                             | 105398<br>(82977,132494)  | 1045.3<br>(814,1325)      | 80767<br>(64553,99384)    | 1047.8<br>(802.5,1344)   | 0.2<br>(-7,7.4)        |
| Dominica                         | 790<br>(621,1002)         | 964.3<br>(762.7,1213)     | 569<br>(454,708)          | 1012.5<br>(789.5,1281)   | 5<br>(-2.3,11.9)       |
| Dominican Republic               | 64526<br>(49923,81246)    | 706.1<br>(557.5,873.9)    | 74999<br>(58204,96702)    | 687.8<br>(533.1,892.1)   | -2.6<br>(-12.2,8.4)    |
| Grenada                          | 1052<br>(795,1363)        | 1023.7<br>(788.3,1307.8)  | 915<br>(728,1162)         | 1059<br>(824.1,1363.2)   | 3.5<br>(-4.1,10.5)     |
| Guyana                           | 8881<br>(6955,11276)      | 964.7<br>(769.6,1199.6)   | 7207<br>(5663,9087)       | 945.6<br>(743.8,1197.2)  | -2<br>(-9.5,4.6)       |
| Haiti                            | 102139<br>(79276,126979)  | 1182.8<br>(943,1447.9)    | 150751<br>(119070,188223) | 1061<br>(847.1,1313.4)   | -10.3<br>(-16.9,-3.6)  |
| Jamaica                          | 28627<br>(22099,36890)    | 1038.2<br>(814.5,1324.2)  | 21612<br>(16953,27391)    | 925.3<br>(713.7,1194.1)  | -10.9<br>(-19.9,-3.2)  |
| Saint Lucia                      | 1693<br>(1315,2153)       | 1015<br>(803.9,1272.2)    | 1308<br>(1048,1603)       | 999<br>(777.1,1265.2)    | -1.6<br>(-9.1,5.2)     |
| Saint Vincent and the Grenadines | 1205<br>(926,1563)        | 907.5<br>(711.7,1161.3)   | 864<br>(678,1093)         | 920.1<br>(710.2,1172.1)  | 1.4<br>(-5.4,7.8)      |
| Suriname                         | 3862<br>(2965,5061)       | 879<br>(684.5,1138.8)     | 4616<br>(3572,5908)       | 885.3<br>(678.4,1145.3)  | 0.7<br>(-6.6,8.5)      |
| Trinidad and                     | 9769                      | 723.5                     | 8338                      | 801.9                    | 10.8                   |

|                                  |                              |                           |                              |                         |                        |
|----------------------------------|------------------------------|---------------------------|------------------------------|-------------------------|------------------------|
| Tobago                           | (7559,12586)                 | (567.6,925)               | (6447,10735)                 | (604.2,1052.9)          | (-2.8,23.4)            |
| Bermuda                          | 430<br>(339,542)             | 894.7<br>(684.6,1158.2)   | 349<br>(275,430)             | 944<br>(709.7,1216.8)   | 5.5<br>(-1.2,12.9)     |
| Puerto Rico                      | 45637<br>(35711,56881)       | 1302.9<br>(1019.3,1618.4) | 26855<br>(21738,33087)       | 1207<br>(942.3,1539)    | -7.4<br>(-14.4,0.3)    |
| Saint Kitts and Nevis            | 428<br>(325,552)             | 924.4<br>(712.9,1179.1)   | 419<br>(325,538)             | 927.2<br>(704.5,1207.1) | 0.3<br>(-5.8,8.6)      |
| United States Virgin Islands     | 895<br>(693,1168)            | 824.4<br>(642.1,1074.5)   | 684<br>(537,863)             | 879.4<br>(673,1142.6)   | 6.7<br>(-0.3,13.8)     |
| Andean Latin America             | 472850<br>(350865,612633)    | 928.5<br>(698.2,1197.4)   | 484221<br>(360725,652231)    | 760.3<br>(565.3,1022.7) | -18.1<br>(-30.5,-9)    |
| Bolivia (Plurinational State of) | 85462<br>(63523,109707)      | 915<br>(693.3,1157.2)     | 106608<br>(79183,144003)     | 768.3<br>(577.3,1028.8) | -16<br>(-26,-7)        |
| Ecuador                          | 115768<br>(85198,151654)     | 877.9<br>(656.2,1142.7)   | 127879<br>(93983,172623)     | 728.1<br>(535.4,985.5)  | -17.1<br>(-29.4,-6.2)  |
| Peru                             | 271620<br>(199167,355757)    | 956.3<br>(715.7,1242.6)   | 249734<br>(185262,337734)    | 775<br>(573.5,1051.5)   | -19<br>(-33.8,-7.3)    |
| Central Latin America            | 1435630<br>(1089179,1851815) | 717.6<br>(561.7,909.6)    | 1372619<br>(1015874,1823855) | 583.3<br>(427.8,775.7)  | -18.7<br>(-26.1,-12.6) |
| Colombia                         | 283260<br>(216120,366723)    | 761.1<br>(595.3,965.9)    | 256255<br>(193451,332665)    | 613.1<br>(452.6,809.5)  | -19.5<br>(-26.9,-13.6) |
| Costa Rica                       | 35127<br>(26816,44964)       | 969.9<br>(758,1219.6)     | 34390<br>(26692,43945)       | 847.6<br>(642.1,1101.3) | -12.6<br>(-23.1,-4)    |
| El Salvador                      | 80440<br>(60576,103848)      | 1212.3<br>(933.8,1536)    | 51853<br>(40329,67188)       | 844.1<br>(652.4,1093.9) | -30.4<br>(-40.6,-19.4) |
| Guatemala                        | 100926<br>(75835,128430)     | 855.4<br>(659.6,1066)     | 105272<br>(77884,140749)     | 530.3<br>(397.1,705)    | -38<br>(-48.3,-29.2)   |
| Honduras                         | 62863<br>(46702,81126)       | 890.6<br>(683.8,1123.4)   | 73991<br>(55648,97341)       | 662.6<br>(505.5,863.3)  | -25.6<br>(-35.8,-17.6) |
| Mexico                           | 617319<br>(455781,841052)    | 606.7<br>(466.3,796)      | 606000<br>(433053,811132)    | 523.8<br>(370.2,712.4)  | -13.7<br>(-21.5,-6.7)  |
| Nicaragua                        | 52518<br>(39045,68940)       | 915.6<br>(708,1175.3)     | 44738<br>(33360,59048)       | 653.1<br>(490.4,859.2)  | -28.7<br>(-38.6,-19.6) |

|                                          |                              |                          |                              |                         |                        |
|------------------------------------------|------------------------------|--------------------------|------------------------------|-------------------------|------------------------|
| Panama                                   | 23974<br>(18619,30295)       | 860.3<br>(674.3,1078.6)  | 30412<br>(23119,39435)       | 748.5<br>(566.8,977.7)  | -13<br>(-23.6,-2.3)    |
| Venezuela<br>(Bolivarian<br>Republic of) | 179203<br>(135096,234165)    | 770.6<br>(592.1,991.3)   | 169708<br>(128442,218919)    | 668.6<br>(500.5,871.9)  | -13.2<br>(-22.3,-6.1)  |
| Tropical Latin<br>America                | 1841692<br>(1338521,2484003) | 1045.4<br>(769.8,1384.5) | 1686457<br>(1214675,2210165) | 916.1<br>(645.5,1218.1) | -12.4<br>(-18.8,-6.6)  |
| Brazil                                   | 1797924<br>(1305007,2425965) | 1053.3<br>(774.1,1398.4) | 1623152<br>(1165808,2128603) | 916.3<br>(643.5,1222)   | -13<br>(-19.6,-7)      |
| Paraguay                                 | 43769<br>(31879,59231)       | 810.6<br>(610.8,1066.7)  | 63305<br>(46892,84222)       | 924.1<br>(682.9,1226.5) | 14<br>(5.9,23.4)       |
| North Africa and<br>Middle East          | 2397788<br>(1873586,3050027) | 614<br>(502.3,748.2)     | 3488139<br>(2767724,4354302) | 589.8<br>(473.1,728.9)  | -3.9<br>(-8.9,0.3)     |
| Algeria                                  | 146771<br>(114676,189342)    | 506.6<br>(414.5,621.6)   | 218593<br>(170849,280218)    | 534.9<br>(419.1,677.1)  | 5.6<br>(-3.6,16.6)     |
| Bahrain                                  | 3234<br>(2538,4109)          | 656.3<br>(531.2,810.7)   | 6166<br>(4904,7614)          | 586.3<br>(459.8,738.7)  | -10.7<br>(-17.9,-4)    |
| Egypt                                    | 372153<br>(287409,474733)    | 584.7<br>(471.3,723.5)   | 566303<br>(441856,720245)    | 554.9<br>(444.1,692)    | -5.1<br>(-12.7,1.6)    |
| Iran (Islamic<br>Republic of)            | 433579<br>(323087,565952)    | 646<br>(516.2,800.1)     | 415328<br>(327426,524205)    | 544.1<br>(418.9,689.9)  | -15.8<br>(-20.4,-10.9) |
| Iraq                                     | 145551<br>(110802,186951)    | 696.4<br>(567,848.6)     | 248615<br>(190297,326436)    | 555.6<br>(436.7,710)    | -20.2<br>(-27.6,-11.1) |
| Jordan                                   | 28502<br>(21329,38171)       | 631.4<br>(501.2,796)     | 76042<br>(57525,98883)       | 629<br>(485.1,805.7)    | -0.4<br>(-7.3,9.3)     |
| Kuwait                                   | 11941<br>(9206,15130)        | 659<br>(521.6,822.3)     | 23469<br>(18102,29633)       | 641.2<br>(484.8,830.3)  | -2.7<br>(-12.4,9.1)    |
| Lebanon                                  | 24091<br>(18971,30902)       | 661<br>(538,821.4)       | 33802<br>(26857,42067)       | 671.7<br>(533.8,842.6)  | 1.6<br>(-5.6,9)        |
| Libya                                    | 30503<br>(22889,39126)       | 622.8<br>(501.5,758.5)   | 34125<br>(27520,41641)       | 589.8<br>(467.8,727.8)  | -5.3<br>(-11.2,0.5)    |
| Morocco                                  | 127525<br>(99425,160957)     | 451.4<br>(365.8,551.7)   | 166275<br>(133121,205765)    | 487.8<br>(390.1,613.4)  | 8.1<br>(-0.3,16.2)     |
| Palestine                                | 14335                        | 558.9                    | 30541                        | 547.8                   | -2                     |

|                      |                              |                         |                              |                         |                        |
|----------------------|------------------------------|-------------------------|------------------------------|-------------------------|------------------------|
|                      | (10683,18994)                | (448.4,693.1)           | (22825,40046)                | (427.1,693.2)           | (-8.6,4.9)             |
| Oman                 | 11310<br>(8635,14877)        | 480.5<br>(378.4,606.5)  | 25413<br>(19975,32469)       | 616.6<br>(477.6,787.3)  | 28.3<br>(17.2,46.6)    |
| Qatar                | 2356<br>(1795,3106)          | 551.7<br>(425.3,709.9)  | 11544<br>(9156,14313)        | 554.7<br>(429.4,711)    | 0.5<br>(-6.7,7.5)      |
| Saudi Arabia         | 71233<br>(53674,92870)       | 373.6<br>(298.4,461.4)  | 132867<br>(105713,165421)    | 461.3<br>(354.3,587.7)  | 23.5<br>(13.4,38.1)    |
| Syrian Arab Republic | 85909<br>(66729,110565)      | 540.6<br>(443.7,655.9)  | 76301<br>(60880,93829)       | 544.3<br>(439.4,668.8)  | 0.7<br>(-6.6,8.5)      |
| Tunisia              | 51650<br>(40706,66023)       | 562.5<br>(462.4,695.8)  | 60869<br>(49618,74973)       | 578<br>(459.7,725.1)    | 2.8<br>(-4.1,11.9)     |
| Turkey               | 463869<br>(371308,575459)    | 741.2<br>(608.5,890.9)  | 515559<br>(435559,611836)    | 719<br>(591,869.3)      | -3<br>(-10.2,3.5)      |
| United Arab Emirates | 16920<br>(13464,21031)       | 941.4<br>(767.5,1133.7) | 62279<br>(50671,76301)       | 905.8<br>(736.4,1107.8) | -3.8<br>(-9.4,3)       |
| Yemen                | 114730<br>(88261,148175)     | 681.8<br>(568.5,817.9)  | 214371<br>(161770,277934)    | 608.2<br>(485.9,750.2)  | -10.8<br>(-16.8,-4.1)  |
| Afghanistan          | 84606<br>(67675,104961)      | 652.3<br>(543.8,774.5)  | 281631<br>(217451,363785)    | 631.2<br>(521.2,764.6)  | -3.2<br>(-9.5,2.3)     |
| Sudan                | 155407<br>(114968,203710)    | 647.3<br>(518,795.3)    | 284502<br>(217381,375039)    | 635.7<br>(508.2,803.8)  | -1.8<br>(-10.4,4.8)    |
| South Asia           | 3901616<br>(3185149,4919914) | 388.2<br>(325.5,459.4)  | 5437961<br>(4525432,6587224) | 329.6<br>(274.9,394.6)  | -15.1<br>(-19,-12.3)   |
| Bangladesh           | 264877<br>(220069,322695)    | 266.8<br>(231.7,305.6)  | 312711<br>(266091,366796)    | 207.5<br>(178,243.3)    | -22.2<br>(-28,-16.4)   |
| Bhutan               | 1650<br>(1374,1995)          | 291.8<br>(253.8,335.7)  | 1483<br>(1276,1752)          | 215.2<br>(185.6,252.4)  | -26.3<br>(-31.8,-20.6) |
| India                | 3251059<br>(2645599,4094151) | 419.3<br>(349.8,500.8)  | 4533398<br>(3732737,5478018) | 356.6<br>(294.3,428.2)  | -14.9<br>(-19.3,-11.8) |
| Nepal                | 35563<br>(29868,42996)       | 204.9<br>(179.6,233.8)  | 48737<br>(41233,57616)       | 175.5<br>(150.2,204.5)  | -14.4<br>(-19.7,-8.9)  |
| Pakistan             | 348466<br>(276260,442692)    | 309.2<br>(259.2,367.1)  | 541633<br>(435288,685684)    | 252.2<br>(211.5,304.1)  | -18.5<br>(-21.6,-15.5) |
| Central Sub-         | 415201                       | 585.1                   | 818097                       | 518.7                   | -11.4                  |

|                                  |                              |                          |                              |                         |                        |
|----------------------------------|------------------------------|--------------------------|------------------------------|-------------------------|------------------------|
| Saharan Africa                   | (318263,530212)              | (480.3,707.9)            | (629087,1053677)             | (420.7,641.5)           | (-16.4,-6)             |
| Angola                           | 89170<br>(69442,112095)      | 682.6<br>(561.7,825.8)   | 201117<br>(151493,261730)    | 528.9<br>(422.5,651.5)  | -22.5<br>(-29.2,-15.2) |
| Central African Republic         | 21634<br>(17002,27150)       | 650.8<br>(540.4,785.9)   | 34817<br>(27207,44222)       | 562.2<br>(460.2,683.2)  | -13.6<br>(-19.1,-7.8)  |
| Congo                            | 19417<br>(15005,24815)       | 656.8<br>(535.3,801.1)   | 34497<br>(26347,44766)       | 593.1<br>(475,745.7)    | -9.7<br>(-16.2,-2.7)   |
| Democratic Republic of the Congo | 275152<br>(206903,355149)    | 550.4<br>(446.1,670.5)   | 530403<br>(407988,686805)    | 508.6<br>(412.3,631.7)  | -7.6<br>(-13.7,-1.2)   |
| Equatorial Guinea                | 3421<br>(2598,4363)          | 623<br>(505.6,746.8)     | 8388<br>(6272,11071)         | 517.6<br>(408.7,657)    | -16.9<br>(-25,-8.4)    |
| Gabon                            | 6407<br>(4950,8184)          | 548.8<br>(442.7,669.7)   | 8875<br>(6767,11466)         | 478.1<br>(375.3,606.1)  | -12.9<br>(-19,-5.8)    |
| Eastern Sub-Saharan Africa       | 1866566<br>(1437024,2426543) | 744.1<br>(605.1,919.9)   | 3319135<br>(2507204,4344481) | 651.8<br>(518.3,817.2)  | -12.4<br>(-16.3,-8.9)  |
| Burundi                          | 60962<br>(46800,78156)       | 833.1<br>(677.3,1020.4)  | 101676<br>(76461,130733)     | 669.1<br>(533.4,821.8)  | -19.7<br>(-25.7,-13.1) |
| Comoros                          | 4337<br>(3328,5602)          | 726.9<br>(588.1,904.2)   | 4947<br>(3835,6291)          | 655.6<br>(519,822.1)    | -9.8<br>(-17.6,-1.3)   |
| Djibouti                         | 4977<br>(3778,6448)          | 787.8<br>(633.8,976)     | 8674<br>(6777,11283)         | 661.2<br>(529.8,835)    | -16.1<br>(-22.7,-9.7)  |
| Eritrea                          | 29371<br>(22967,37337)       | 763.7<br>(622.3,936)     | 52549<br>(40268,67740)       | 680.1<br>(545.5,847.3)  | -11<br>(-17.2,-4.4)    |
| Ethiopia                         | 408660<br>(308529,542179)    | 611.1<br>(490,764.2)     | 689033<br>(494291,938485)    | 505.6<br>(383.1,660)    | -17.3<br>(-23.4,-11.3) |
| Kenya                            | 167476<br>(121357,228150)    | 548.2<br>(429.9,699.5)   | 280521<br>(205184,377311)    | 483.6<br>(373.5,631.8)  | -11.8<br>(-14.5,-9.3)  |
| Madagascar                       | 195727<br>(153362,255113)    | 1190.1<br>(963.5,1490.4) | 273651<br>(213853,344796)    | 859.3<br>(699.1,1043.8) | -27.8<br>(-34.3,-20.8) |
| Malawi                           | 80387<br>(60369,104319)      | 638.6<br>(503.4,791.4)   | 137164<br>(103069,178788)    | 610.7<br>(483.5,770.9)  | -4.4<br>(-11.8,2.3)    |
| Mozambique                       | 120725<br>(92612,156418)     | 698<br>(569.8,863.3)     | 255838<br>(192943,337370)    | 673.4<br>(540.1,839.7)  | -3.5<br>(-10.6,3)      |

|                                 |                              |                         |                              |                          |                        |
|---------------------------------|------------------------------|-------------------------|------------------------------|--------------------------|------------------------|
| Rwanda                          | 122363<br>(95242,159159)     | 1290.8<br>(1056,1592.1) | 150237<br>(116676,191043)    | 1060.1<br>(853.9,1311.3) | -17.9<br>(-24.8,-10.4) |
| Somalia                         | 76901<br>(57992,98036)       | 832<br>(667,1021)       | 177550<br>(137118,231482)    | 686.8<br>(559.4,847.1)   | -17.5<br>(-24.2,-11)   |
| United Republic of<br>Tanzania  | 296461<br>(222485,389370)    | 875.6<br>(696.6,1101.2) | 612808<br>(460356,799475)    | 862.1<br>(681.6,1079)    | -1.5<br>(-7.1,4.9)     |
| Uganda                          | 198022<br>(149950,262233)    | 840.7<br>(673.4,1042.2) | 398032<br>(292298,528517)    | 750.6<br>(593,955)       | -10.7<br>(-18,-2.1)    |
| Zambia                          | 43743<br>(32947,57110)       | 421.6<br>(339.7,519.8)  | 97999<br>(72167,129647)      | 427.7<br>(328.4,544.8)   | 1.5<br>(-7.1,10.6)     |
| South Sudan                     | 55084<br>(42534,71416)       | 747.4<br>(604,920.6)    | 75804<br>(57146,98742)       | 650.9<br>(520.6,815.6)   | -12.9<br>(-18.3,-7.4)  |
| Southern Sub-<br>Saharan Africa | 323886<br>(237510,424938)    | 563.1<br>(430,713.7)    | 385370<br>(289150,504564)    | 496.9<br>(376.5,641.5)   | -11.8<br>(-17.4,-6.8)  |
| Botswana                        | 5508<br>(4222,6982)          | 389.5<br>(320,469.1)    | 10019<br>(7506,13328)        | 436<br>(335.6,567.3)     | 11.9<br>(-1.1,35.1)    |
| Lesotho                         | 4832<br>(3769,6091)          | 247.3<br>(204.6,297.2)  | 5123<br>(4175,6222)          | 247.4<br>(206.9,295.8)   | 0<br>(-5.4,6)          |
| Namibia                         | 5942<br>(4641,7543)          | 390.3<br>(323.9,470.7)  | 8738<br>(6746,11092)         | 351<br>(281.1,432.6)     | -10.1<br>(-16.8,-3.7)  |
| South Africa                    | 265161<br>(189704,352315)    | 668.7<br>(487.9,866.7)  | 302856<br>(216857,402989)    | 579.8<br>(417.4,771.4)   | -13.3<br>(-19.8,-7.2)  |
| Eswatini                        | 6074<br>(4670,7906)          | 671.2<br>(555.8,813.2)  | 7142<br>(5569,8859)          | 612.8<br>(500.9,744.2)   | -8.7<br>(-15.4,-1.8)   |
| Zimbabwe                        | 36369<br>(27368,47580)       | 318.5<br>(262,386.6)    | 51492<br>(40122,65729)       | 327.7<br>(267.9,397.6)   | 2.9<br>(-1.6,8.5)      |
| Western Sub-<br>Saharan Africa  | 1353823<br>(1025497,1781921) | 581.5<br>(469.3,726)    | 2824158<br>(2102924,3781716) | 514.3<br>(408.9,658.5)   | -11.6<br>(-14.9,-8.3)  |
| Benin                           | 31332<br>(23291,41543)       | 515.8<br>(419.3,635.5)  | 72418<br>(52917,96381)       | 469.8<br>(371.6,584.7)   | -8.9<br>(-15.8,-1.9)   |
| Burkina Faso                    | 56974<br>(42012,75020)       | 444<br>(353,554.8)      | 131075<br>(95954,177974)     | 449.8<br>(353.2,577.8)   | 1.3<br>(-5.9,8.4)      |
| Cameroon                        | 54195<br>(41387,71560)       | 441.2<br>(361.7,546.3)  | 140046<br>(102838,188093)    | 412.7<br>(325.5,523)     | -6.5<br>(-14.5,1.9)    |

|                       |                            |                        |                              |                        |                       |
|-----------------------|----------------------------|------------------------|------------------------------|------------------------|-----------------------|
| Cabo Verde            | 2069<br>(1535,2718)        | 479.7<br>(383,595.1)   | 2413<br>(1853,3146)          | 435.2<br>(333.5,566.8) | -9.3<br>(-16.1,-1.2)  |
| Chad                  | 30051<br>(22466,39400)     | 401<br>(323.7,495.3)   | 85256<br>(61631,116071)      | 391.1<br>(311.4,492.2) | -2.5<br>(-9.2,5.3)    |
| Côte d'Ivoire         | 78070<br>(58852,104186)    | 529<br>(430.5,659.1)   | 155984<br>(117239,206990)    | 514.6<br>(403.9,648.4) | -2.7<br>(-10.8,5)     |
| Gambia                | 6019<br>(4441,8039)        | 506.6<br>(409.8,622.9) | 12141<br>(9052,15846)        | 470.4<br>(370.7,584.8) | -7.1<br>(-13.4,0.8)   |
| Ghana                 | 68100<br>(49502,91455)     | 363.4<br>(286.5,462.5) | 131817<br>(98899,172299)     | 380.3<br>(295.4,485.3) | 4.7<br>(-1.2,11.2)    |
| Guinea                | 43848<br>(33516,58527)     | 574<br>(466.9,719.8)   | 84133<br>(63528,113570)      | 546.8<br>(441.5,689.1) | -4.7<br>(-11.8,2.3)   |
| Guinea-Bissau         | 6749<br>(5164,8734)        | 568.3<br>(463.7,687.5) | 10781<br>(8131,13898)        | 496.2<br>(400.4,610.6) | -12.7<br>(-19.7,-5.9) |
| Liberia               | 12282<br>(9074,16322)      | 479.3<br>(380.4,608.8) | 23331<br>(17080,31164)       | 420.8<br>(325.6,541.1) | -12.2<br>(-20.5,-4.1) |
| Mali                  | 39006<br>(29773,51662)     | 370.6<br>(305.5,462.3) | 105829<br>(78936,142381)     | 383.3<br>(309,479)     | 3.4<br>(-3.3,10)      |
| Mauritania            | 17786<br>(13300,23725)     | 736.4<br>(591.2,924.8) | 30696<br>(23255,40683)       | 679.7<br>(541.6,858.9) | -7.7<br>(-15.2,-0.3)  |
| Niger                 | 57784<br>(43121,76310)     | 552.9<br>(447.7,682.1) | 145970<br>(106775,198158)    | 467.8<br>(371,589.8)   | -15.4<br>(-21.9,-7.6) |
| Nigeria               | 758132<br>(570645,1004524) | 709.8<br>(570.2,885.3) | 1524454<br>(1132369,2056074) | 591.9<br>(467.2,756.5) | -16.6<br>(-20.4,-13)  |
| Sao Tome and Principe | 1082<br>(832,1390)         | 719.4<br>(589.7,874.3) | 1329<br>(1039,1658)          | 623.2<br>(508.7,753.5) | -13.4<br>(-21.9,-4.5) |
| Senegal               | 39404<br>(29838,52202)     | 421.1<br>(343.4,522.9) | 70251<br>(52236,93382)       | 403.6<br>(319.4,513.2) | -4.1<br>(-11.9,3)     |
| Sierra Leone          | 23486<br>(17886,30941)     | 523.8<br>(418.3,647.6) | 45585<br>(34248,60200)       | 472.5<br>(374.6,595.8) | -9.8<br>(-17,-2.2)    |
| Togo                  | 27408<br>(20326,36541)     | 611.7<br>(493.2,755.8) | 50610<br>(37927,66537)       | 567.4<br>(451.6,719.5) | -7.2<br>(-14.6,1.3)   |

SDI, socio-demographic index. 95% UI=95% uncertainty interval.



**Table S2.** Asthma prevalence in 1990 and 2019 and percentage change in age-standardized rates by location.

| Prevalence of asthma                  | 1990                               |                           | 2019                               |                           | Percentage change in age-standardized rates between 1990 and 2019 |
|---------------------------------------|------------------------------------|---------------------------|------------------------------------|---------------------------|-------------------------------------------------------------------|
|                                       | Counts (95% UI)                    | Rate (95% UI)             | Counts (95% UI)                    | Rate (95% UI)             |                                                                   |
| Global                                | 226904790<br>(195205509,269078167) | 4496.9<br>(3913.5,5224.3) | 262405182<br>(224047914,309452681) | 3415.5<br>(2898.9,4066.2) | -24<br>(-27.2,-20.8)                                              |
| High SDI                              | 71267451<br>(62525167,82436645)    | 8329.5<br>(7264.7,9693.1) | 68952653<br>(60703694,78756181)    | 6855.1<br>(5876.7,8058.5) | -17.7<br>(-20.9,-14.2)                                            |
| High-middle SDI                       | 47644397<br>(40601957,56426837)    | 4240.9<br>(3624.3,5025.4) | 42846686<br>(35939860,51183980)    | 3103<br>(2541.3,3833.3)   | -26.8<br>(-32.1,-22.2)                                            |
| Low SDI                               | 20556433<br>(17394826,25114690)    | 4007.1<br>(3512.8,4592.4) | 37911430<br>(31439353,46543194)    | 3468.6<br>(3015.3,4035.8) | -13.4<br>(-16.6,-10.2)                                            |
| Low-middle SDI                        | 32578711<br>(27508062,39391204)    | 3154.1<br>(2737.2,3679.8) | 45235060<br>(38351484,54097332)    | 2713.2<br>(2317.3,3209.7) | -14<br>(-17.7,-11)                                                |
| Middle SDI                            | 54683036<br>(45361677,67653910)    | 3268.8<br>(2765,3919.4)   | 67251100<br>(56236271,81268923)    | 2927.1<br>(2429.3,3578.8) | -10.5<br>(-13.5,-7.3)                                             |
| East Asia                             | 27119267<br>(21801409,34527343)    | 2359.3<br>(1912.3,2950.4) | 26502559<br>(21606395,32719373)    | 2025.5<br>(1577.4,2631.4) | -14.1<br>(-18.5,-10.3)                                            |
| China                                 | 25559015<br>(20406450,32633238)    | 2296.6<br>(1852.1,2880.7) | 24766952<br>(20076066,30666151)    | 1974.2<br>(1530.2,2565.4) | -14<br>(-18.4,-10.2)                                              |
| Democratic People's Republic of Korea | 763486<br>(628964,963121)          | 3852.1<br>(3195.9,4916.2) | 998398<br>(880328,1140797)         | 3704.7<br>(3216.5,4372.6) | -3.8<br>(-21.6,5.3)                                               |
| Taiwan (Province of China)            | 796766<br>(670325,980824)          | 4235.8<br>(3579.8,5155.3) | 737209<br>(628778,879469)          | 3385.7<br>(2740.5,4296.1) | -20.1<br>(-31.7,-4.5)                                             |
| Southeast Asia                        | 16716040<br>(14178709,20256894)    | 3737.2<br>(3253.9,4370.2) | 22359243<br>(19257485,26371311)    | 3431.8<br>(2926.7,4059.8) | -8.2<br>(-11,-5.1)                                                |
| Cambodia                              | 227575<br>(184185,283855)          | 2172.8<br>(1884.4,2526.4) | 386095<br>(322587,474535)          | 2403.3<br>(2034,2896.1)   | 10.6<br>(3.9,18.2)                                                |
| Indonesia                             | 6702563<br>(5644399,8162426)       | 3811.9<br>(3283,4515.2)   | 8673884<br>(7367856,10270736)      | 3431.2<br>(2918.3,4055.4) | -10<br>(-13.4,-6.1)                                               |

|                                  |                              |                           |                              |                           |                        |
|----------------------------------|------------------------------|---------------------------|------------------------------|---------------------------|------------------------|
| Lao People's Democratic Republic | 103986<br>(87489,126244)     | 2401.6<br>(2100.2,2774)   | 147309<br>(126746,175671)    | 2140.9<br>(1867.9,2502.1) | -10.9<br>(-16,-4.6)    |
| Malaysia                         | 531064<br>(460610,622801)    | 3348.1<br>(2967,3795.6)   | 792596<br>(662895,969016)    | 2624.7<br>(2178.2,3253.9) | -21.6<br>(-30.7,-11.2) |
| Maldives                         | 8980<br>(7529,10820)         | 3624.4<br>(3167.9,4154.6) | 11018<br>(8811,13955)        | 2422.7<br>(1927.2,3083.7) | -33.2<br>(-43.7,-21.1) |
| Myanmar                          | 843885<br>(731074,992833)    | 2178.3<br>(1935.9,2475.6) | 1065997<br>(933366,1212653)  | 2016.2<br>(1770.2,2293.1) | -7.4<br>(-12.2,-2.8)   |
| Philippines                      | 3950818<br>(3223138,4989881) | 5870.1<br>(4962.4,7115.7) | 5218948<br>(4372997,6402826) | 4628.3<br>(3916.2,5595.1) | -21.2<br>(-23.1,-19.2) |
| Sri Lanka                        | 537049<br>(470011,619236)    | 3611.2<br>(3208.9,4041.9) | 799526<br>(705682,914751)    | 3541.7<br>(3091.4,4114.2) | -1.9<br>(-8.7,5.6)     |
| Thailand                         | 2009331<br>(1734418,2354719) | 3917.9<br>(3442.7,4486)   | 2309631<br>(2005712,2688542) | 3411.5<br>(2863.7,4141.6) | -12.9<br>(-21.1,-4.2)  |
| Timor-Leste                      | 26325<br>(21879,31618)       | 3155.1<br>(2752.2,3619.9) | 39729<br>(33710,47061)       | 2905<br>(2544.4,3332.8)   | -7.9<br>(-13.8,-1.9)   |
| Viet Nam                         | 1708255<br>(1411737,2146063) | 2603.1<br>(2231.7,3086.1) | 2849227<br>(2429245,3358420) | 3092.6<br>(2613.1,3713.9) | 18.8<br>(13.1,25.6)    |
| Mauritius                        | 42204<br>(36763,49125)       | 4222.4<br>(3732.1,4835.5) | 33596<br>(29238,39278)       | 2774<br>(2334.5,3376.8)   | -34.3<br>(-40.2,-27.4) |
| Seychelles                       | 1785<br>(1492,2188)          | 2476.5<br>(2120.6,2959.5) | 2394<br>(2041,2850)          | 2475.7<br>(2052.3,3052.4) | 0<br>(-5.7,5.7)        |
| Oceania                          | 314116<br>(278533,358461)    | 5449.7<br>(4929.3,6014.6) | 529213<br>(467646,599363)    | 4265.2<br>(3835,4731.9)   | -21.7<br>(-24.6,-18.8) |
| Fiji                             | 31450<br>(27142,36539)       | 4795.3<br>(4209.9,5431.4) | 29196<br>(25128,34144)       | 3289.1<br>(2847.4,3816.3) | -31.4<br>(-36.1,-26.6) |
| Kiribati                         | 4574<br>(4159,5041)          | 6715.2<br>(6192.7,7250.4) | 5277<br>(4787,5861)          | 4759.3<br>(4377.4,5201.5) | -29.1<br>(-32.1,-25.9) |
| Marshall Islands                 | 1647<br>(1393,1985)          | 3894.2<br>(3513.5,4360.8) | 1682<br>(1383,2062)          | 3015.2<br>(2495.9,3682)   | -22.6<br>(-32.3,-11.3) |
| Micronesia (Federated States of) | 3764<br>(3246,4444)          | 3883.1<br>(3497.1,4330.6) | 3140<br>(2583,3836)          | 3144.1<br>(2602.2,3828.5) | -19<br>(-29.2,-7.4)    |

|                          |                              |                           |                              |                           |                        |
|--------------------------|------------------------------|---------------------------|------------------------------|---------------------------|------------------------|
| Papua New Guinea         | 217931<br>(193532,247825)    | 6044<br>(5460.1,6634.9)   | 412884<br>(365292,465899)    | 4585.6<br>(4143.3,5043.6) | -24.1<br>(-27.1,-20.8) |
| Samoa                    | 5476<br>(4503,6713)          | 3535.5<br>(3027.2,4102.2) | 6241<br>(5021,7810)          | 2953.1<br>(2413,3599.3)   | -16.5<br>(-24,-5)      |
| Solomon Islands          | 12059<br>(10102,14652)       | 3904<br>(3445.6,4493.3)   | 22074<br>(17931,27939)       | 3472<br>(2872,4273.8)     | -11.1<br>(-21.3,-0.8)  |
| Tonga                    | 4217<br>(3429,5331)          | 4503.5<br>(3827.7,5376.1) | 3798<br>(3042,4782)          | 3661.4<br>(2980.7,4537.5) | -18.7<br>(-25.6,-6)    |
| Vanuatu                  | 4902<br>(4121,5869)          | 3425.9<br>(3019.6,3884.9) | 8924<br>(6535,11929)         | 3047.1<br>(2203.7,3990.2) | -11.1<br>(-33,8.8)     |
| American Samoa           | 1655<br>(1320,2109)          | 3486.5<br>(2789.2,4264)   | 1853<br>(1277,2351)          | 3340.5<br>(2255.1,4204.6) | -4.2<br>(-21.7,11.4)   |
| Cook Islands             | 754<br>(563,970)             | 3996.5<br>(2926.7,5014.2) | 638<br>(422,786)             | 3582.2<br>(2502.9,4533.6) | -10.4<br>(-17.2,4)     |
| Guam                     | 5265<br>(3872,6709)          | 3991.6<br>(2848.1,5007.1) | 5680<br>(3905,7189)          | 3380<br>(2382,4343.3)     | -15.3<br>(-20.5,-10)   |
| Nauru                    | 345<br>(287,434)             | 3479.5<br>(2998.4,4127.4) | 340<br>(261,452)             | 3289.8<br>(2534.3,4239.2) | -5.5<br>(-23.3,10.3)   |
| Niue                     | 86<br>(68,110)               | 3569.1<br>(2794.2,4479.2) | 59<br>(39,73)                | 3507.3<br>(2425.4,4402.8) | -1.7<br>(-16.8,10.2)   |
| Northern Mariana Islands | 1662<br>(1300,2101)          | 4054.6<br>(3137.6,5061.4) | 1414<br>(940,1750)           | 3574.8<br>(2623.3,4576.9) | -11.8<br>(-20.5,3.7)   |
| Palau                    | 601<br>(498,723)             | 4096.5<br>(3423,4835.4)   | 573<br>(460,676)             | 3321.1<br>(2719.3,4038)   | -18.9<br>(-22.8,-13.7) |
| Tokelau                  | 59<br>(45,81)                | 3385.2<br>(2567.8,4566.2) | 50<br>(35,64)                | 3426.6<br>(2381.9,4338.6) | 1.2<br>(-17.7,28.6)    |
| Tuvalu                   | 286<br>(243,342)             | 3107.5<br>(2681.8,3649.8) | 396<br>(272,504)             | 3395.5<br>(2319.9,4292.1) | 9.3<br>(-21.6,27.8)    |
| Central Asia             | 1729168<br>(1458761,2094774) | 2691.4<br>(2311,3149.1)   | 2072070<br>(1692605,2559339) | 2277.4<br>(1883.3,2787.8) | -15.4<br>(-21.8,-9.4)  |
| Armenia                  | 65275<br>(52617,81444)       | 1951.8<br>(1590.4,2395.3) | 62216<br>(46975,76442)       | 2093.1<br>(1628.9,2624.8) | 7.2<br>(-6.3,16.2)     |
| Azerbaijan               | 147618<br>(121631,182986)    | 2114.1<br>(1788.8,2546.5) | 189910<br>(156275,234271)    | 1961.2<br>(1608.6,2435.7) | -7.2<br>(-13.2,-0.7)   |

|                           |                              |                            |                              |                           |                        |
|---------------------------|------------------------------|----------------------------|------------------------------|---------------------------|------------------------|
| Georgia                   | 115958<br>(99783,136629)     | 2093.3<br>(1799.1,2487.9)  | 69582<br>(56805,85459)       | 1958.9<br>(1572.5,2475.3) | -6.4<br>(-17.6,6.1)    |
| Kazakhstan                | 251154<br>(208289,304227)    | 1600.1<br>(1341.6,1907.6)  | 286976<br>(232367,356099)    | 1590.7<br>(1282.7,1958.2) | -0.6<br>(-9.3,7.8)     |
| Kyrgyzstan                | 140899<br>(117605,172070)    | 3441.9<br>(2937.4,4035.5)  | 156012<br>(124978,197291)    | 2417.2<br>(1960.7,3005.4) | -29.8<br>(-38.1,-21.2) |
| Mongolia                  | 47623<br>(38949,58904)       | 2610<br>(2257.2,3036.7)    | 67114<br>(55071,82906)       | 2114.2<br>(1759.6,2568.5) | -19<br>(-25.4,-12.4)   |
| Tajikistan                | 122501<br>(98602,155195)     | 2610.9<br>(2233.7,3065.6)  | 194584<br>(154930,248712)    | 2264.7<br>(1862.9,2762.3) | -13.3<br>(-20.4,-5.6)  |
| Turkmenistan              | 100661<br>(84042,122848)     | 2936.6<br>(2566.8,3387.6)  | 101614<br>(78999,129040)     | 2011.3<br>(1553.2,2532.4) | -31.5<br>(-45.6,-22.5) |
| Uzbekistan                | 737480<br>(617144,882556)    | 4267.9<br>(3652.8,4907.7)  | 944062<br>(779576,1162863)   | 3058.7<br>(2581.6,3661)   | -28.3<br>(-35,-21.2)   |
| Central Europe            | 7584607<br>(6440124,8966701) | 5794<br>(4905.8,6911.4)    | 5066122<br>(4218455,6051251) | 4203.6<br>(3452.8,5155.5) | -27.4<br>(-32.9,-21.9) |
| Albania                   | 79535<br>(66440,98952)       | 2613.1<br>(2252.1,3122.1)  | 79785<br>(66537,96602)       | 2828.4<br>(2319.7,3483.9) | 8.2<br>(-3.4,21.2)     |
| Bosnia and<br>Herzegovina | 202586<br>(169114,245602)    | 4597.2<br>(3865.7,5553.5)  | 161181<br>(134157,192943)    | 4466.4<br>(3656.7,5529.5) | -2.8<br>(-9,2.6)       |
| Bulgaria                  | 395019<br>(328696,474831)    | 4196.2<br>(3509.4,5086.6)  | 260803<br>(213949,311776)    | 3612.7<br>(2919.2,4427.3) | -13.9<br>(-21.1,-5.2)  |
| Croatia                   | 285241<br>(232914,342261)    | 5327.1<br>(4355.5,6448.7)  | 188078<br>(158810,223334)    | 4018.6<br>(3316.2,4929.4) | -24.6<br>(-31.8,-18.2) |
| Czechia                   | 328324<br>(275297,398492)    | 3146.2<br>(2596.8,3844.6)  | 327052<br>(269708,392256)    | 3053.1<br>(2479.9,3781.1) | -3<br>(-9.5,2.8)       |
| Hungary                   | 447614<br>(382530,522251)    | 4067.3<br>(3435,4817.8)    | 321229<br>(265614,385390)    | 3307.1<br>(2677.6,4083.2) | -18.7<br>(-25,-11.3)   |
| North Macedonia           | 135837<br>(105001,167770)    | 7017.1<br>(5386.6,8675)    | 123320<br>(105483,145172)    | 5199.8<br>(4376.1,6200.5) | -25.9<br>(-37.2,-9.8)  |
| Montenegro                | 20387<br>(16549,25645)       | 3257<br>(2650.2,4102.3)    | 22896<br>(18278,28178)       | 3620.9<br>(2883.6,4557.2) | 11.2<br>(2.9,20.2)     |
| Poland                    | 3982472<br>(3319829,4735834) | 9777.6<br>(8170.3,11707.3) | 2214693<br>(1848570,2654560) | 5412.7<br>(4414,6639.1)   | -44.6<br>(-50.3,-38.7) |

|                             |                                 |                           |                              |                           |                        |
|-----------------------------|---------------------------------|---------------------------|------------------------------|---------------------------|------------------------|
| Romania                     | 1116656<br>(913031,1341825)     | 4547.4<br>(3707.6,5545.1) | 844316<br>(694482,1015131)   | 4179.7<br>(3402.3,5180.6) | -8.1<br>(-17.4,3.5)    |
| Serbia                      | 305521<br>(264298,356220)       | 3180.5<br>(2729.9,3769.3) | 260377<br>(224080,303471)    | 2849.1<br>(2358,3452.6)   | -10.4<br>(-15.7,-4.9)  |
| Slovakia                    | 159981<br>(133542,192933)       | 2996.2<br>(2487.2,3645.7) | 159787<br>(131167,192792)    | 2915<br>(2363.3,3588.8)   | -2.7<br>(-8.9,4)       |
| Slovenia                    | 125435<br>(106300,150286)       | 5944.6<br>(5013.1,7137.4) | 102604<br>(84762,123241)     | 4591.9<br>(3730.8,5677.8) | -22.8<br>(-29.4,-16.3) |
| Eastern Europe              | 11342552<br>(9588423,13401133)  | 4728<br>(3978.8,5645.9)   | 5363011<br>(4377809,6458925) | 2712<br>(2160.8,3412.6)   | -42.6<br>(-48.2,-37.1) |
| Belarus                     | 601869<br>(498203,710929)       | 5389.7<br>(4451.6,6393.2) | 328033<br>(271030,396927)    | 3417.7<br>(2760.8,4292.8) | -36.6<br>(-44,-28.9)   |
| Estonia                     | 45504<br>(39891,51539)          | 2800.5<br>(2426.7,3210.7) | 26128<br>(21891,30890)       | 2075.2<br>(1663.8,2580.6) | -25.9<br>(-35.4,-17.2) |
| Latvia                      | 142340<br>(123131,163443)       | 4930.2<br>(4268.5,5758.8) | 60696<br>(51539,72358)       | 3184.7<br>(2584.8,4052.7) | -35.4<br>(-44.3,-25.2) |
| Lithuania                   | 126760<br>(107839,147317)       | 3289<br>(2775.8,3878.7)   | 73987<br>(61789,88189)       | 2718.4<br>(2191.4,3363.6) | -17.3<br>(-26.9,-5.9)  |
| Republic of<br>Moldova      | 162782<br>(140214,193737)       | 3628.6<br>(3119.3,4341.8) | 98058<br>(78493,119716)      | 2750.9<br>(2200.5,3503.8) | -24.2<br>(-33.5,-17)   |
| Russian<br>Federation       | 7745720<br>(6534273,9187026)    | 4811.5<br>(4055.7,5734)   | 3507708<br>(2866450,4254388) | 2520.1<br>(2004.5,3174.2) | -47.6<br>(-53.3,-42)   |
| Ukraine                     | 2517578<br>(2098292,3020646)    | 4703.5<br>(3848.7,5741.1) | 1268399<br>(1019017,1553151) | 3227.1<br>(2528.4,4076.4) | -31.4<br>(-37.8,-25)   |
| High-income Asia<br>Pacific | 13119777<br>(11259128,15128897) | 7293.6<br>(6258.9,8484.2) | 7250096<br>(6115953,8632440) | 3744.9<br>(3032.3,4726.2) | -48.7<br>(-54.3,-42.8) |
| Brunei<br>Darussalam        | 11045<br>(9069,13801)           | 5638.9<br>(4734.3,6942.6) | 17726<br>(14631,21814)       | 4887.1<br>(4088.1,5908.9) | -13.3<br>(-22.4,-7.6)  |
| Japan                       | 11246046<br>(9650457,12976284)  | 8192.5<br>(6971.2,9598.4) | 5117128<br>(4314187,6091159) | 3865.4<br>(3118.7,4890.8) | -52.8<br>(-57.7,-47.8) |
| Republic of Korea           | 1673792<br>(1416284,2002798)    | 4491.3<br>(3824.4,5330.3) | 1915846<br>(1611521,2324501) | 3608.6<br>(2959.5,4514.6) | -19.7<br>(-32.1,-7.2)  |
| Singapore                   | 188894<br>(156202,220536)       | 6704.5<br>(5653.4,7742.1) | 199395<br>(165089,242229)    | 3667.1<br>(3012.1,4564.7) | -45.3<br>(-53,-34.6)   |

|                |                                 |                                  |                                 |                            |                        |
|----------------|---------------------------------|----------------------------------|---------------------------------|----------------------------|------------------------|
| Australasia    | 2416862<br>(2231065,2617852)    | 12086.4<br>(11123.8,13091)       | 2317311<br>(1958150,2773621)    | 8393.3<br>(6908.8,10347.1) | -30.6<br>(-40.6,-18.5) |
| Australia      | 1926397<br>(1794473,2066600)    | 11699.5<br>(10879.2,12543.4<br>) | 2047081<br>(1720113,2448384)    | 8768.4<br>(7162.3,10821.7) | -25.1<br>(-37.7,-9.1)  |
| New Zealand    | 490464<br>(409341,591110)       | 14102.2<br>(11736.5,17001.4<br>) | 270231<br>(226570,327195)       | 6325.9<br>(5157,7871.3)    | -55.1<br>(-59.1,-50.4) |
| Western Europe | 36305394<br>(31890731,41260353) | 8332.1<br>(7288,9673.8)          | 27043663<br>(22873450,31920142) | 5893.4<br>(4900.3,7117.7)  | -29.3<br>(-35.1,-23.6) |
| Andorra        | 3822<br>(3175,4579)             | 6830.6<br>(5712.6,8190.9)        | 5104<br>(4196,6161)             | 5846.7<br>(4810.2,7128)    | -14.4<br>(-20.6,-8.7)  |
| Austria        | 618927<br>(525088,718198)       | 7014.8<br>(5951.9,8272.9)        | 489835<br>(405031,590357)       | 5220.3<br>(4280.7,6380.5)  | -25.6<br>(-33.7,-16.4) |
| Belgium        | 838526<br>(729289,974390)       | 7261.5<br>(6235.7,8543.2)        | 542551<br>(456000,645456)       | 4609.9<br>(3791.9,5606.2)  | -36.5<br>(-44.8,-26.4) |
| Cyprus         | 60638<br>(48931,73868)          | 7624.9<br>(6154.1,9289.6)        | 99525<br>(80592,120953)         | 7088.5<br>(5756.9,8584.5)  | -7<br>(-14.5,0.5)      |
| Denmark        | 359686<br>(309203,417605)       | 6288.2<br>(5436,7394.6)          | 282375<br>(236946,337040)       | 4782.7<br>(3910,5846.1)    | -23.9<br>(-33.2,-14.3) |
| Finland        | 363900<br>(310887,422891)       | 6716.6<br>(5669.8,7866.1)        | 382167<br>(324212,446291)       | 6102.5<br>(5043.2,7355.7)  | -9.1<br>(-16.7,-2.1)   |
| France         | 6252763<br>(5566864,7109420)    | 9667.6<br>(8521.8,11260)         | 4605053<br>(3858024,5438405)    | 6555.2<br>(5357.4,7933)    | -32.2<br>(-40,-23.2)   |
| Germany        | 6650125<br>(5702966,7623160)    | 7013.1<br>(6073.5,8135.5)        | 3609452<br>(3014106,4299203)    | 4153.1<br>(3405.4,5081.3)  | -40.8<br>(-49.2,-31.4) |
| Greece         | 690826<br>(577397,825221)       | 5885.1<br>(4858.4,7170.6)        | 591070<br>(487644,712681)       | 5301.5<br>(4326.2,6546.3)  | -9.9<br>(-19,3.1)      |
| Iceland        | 24412<br>(20629,28822)          | 9533.1<br>(8020.7,11268.7)       | 25584<br>(21169,30771)          | 7200.1<br>(5844.4,8849.1)  | -24.5<br>(-32.1,-17.4) |
| Ireland        | 376823<br>(323905,434076)       | 10213.7<br>(8764.9,11835)        | 343380<br>(288588,410323)       | 6860.2<br>(5695,8348.2)    | -32.8<br>(-39.1,-25.9) |
| Israel         | 324289<br>(271489,382244)       | 6611.9<br>(5557.4,7744.7)        | 465362<br>(392157,560172)       | 4958<br>(4134.5,6019.9)    | -25<br>(-31.2,-18.5)   |

|                           |                               |                                  |                              |                            |                        |
|---------------------------|-------------------------------|----------------------------------|------------------------------|----------------------------|------------------------|
| Italy                     | 3953862<br>(3330334,4689031)  | 5629.3<br>(4734.8,6690.8)        | 2561074<br>(2052642,3143467) | 4027.9<br>(3173.8,5106.7)  | -28.4<br>(-37.3,-18.8) |
| Luxembourg                | 38739<br>(32544,49713)        | 9298.2<br>(7741.4,11642.6)       | 44283<br>(36990,52364)       | 6772.1<br>(5585.7,8149.6)  | -27.2<br>(-38.4,-20.5) |
| Malta                     | 35647<br>(30501,41969)        | 9026<br>(7735.2,10612)           | 35018<br>(29624,41788)       | 7075.9<br>(5876.3,8569.6)  | -21.6<br>(-29.9,-12.3) |
| Netherlands               | 1317147<br>(1051808,1607954)  | 8134.5<br>(6445,10065.6)         | 1328832<br>(1109852,1597936) | 6942<br>(5702.6,8418.9)    | -14.7<br>(-23.9,3.7)   |
| Norway                    | 568647<br>(489979,666025)     | 11310.8<br>(9649.8,13320)        | 372463<br>(309274,444225)    | 6790.1<br>(5589.9,8270.1)  | -40<br>(-45.6,-34.4)   |
| Portugal                  | 1261598<br>(1053218,1506637)  | 11168.3<br>(9284.4,13524)        | 1104294<br>(925175,1307774)  | 9106.2<br>(7499.7,11069.6) | -18.5<br>(-28.1,-6.3)  |
| Spain                     | 2029684<br>(1721962,2420902)  | 4757.4<br>(3990.1,5809.5)        | 2235478<br>(1869134,2664775) | 4481.3<br>(3636.5,5512.2)  | -5.8<br>(-16.6,11)     |
| Sweden                    | 1190422<br>(999986,1417070)   | 11444.2<br>(9558.6,13661.7)      | 824426<br>(669881,1009469)   | 7586.1<br>(6046.6,9403)    | -33.7<br>(-40.3,-26.3) |
| Switzerland               | 643531<br>(548930,753372)     | 8441<br>(7133.5,9998.2)          | 608821<br>(507686,733943)    | 6615.9<br>(5412.6,8052.1)  | -21.6<br>(-30.6,-11.3) |
| United Kingdom            | 8667759<br>(7453177,10051051) | 13998.6<br>(11939.2,16447.4<br>) | 6459573<br>(5468359,7563834) | 9166.6<br>(7645,11034.5)   | -34.5<br>(-37.7,-31)   |
| Monaco                    | 2034<br>(1721,2418)           | 6174.5<br>(5088,7532.3)          | 2407<br>(2012,2864)          | 6014<br>(4939.7,7271.8)    | -2.6<br>(-8.1,3.4)     |
| San Marino                | 1443<br>(1198,1719)           | 5894.4<br>(4867.3,7102.6)        | 1959<br>(1615,2369)          | 5759.2<br>(4728,7134.2)    | -2.3<br>(-8,4.2)       |
| Southern Latin<br>America | 3277350<br>(2819037,3831780)  | 6696.1<br>(5768.6,7777.8)        | 4431281<br>(3786071,5243875) | 6450.2<br>(5427.8,7800.4)  | -3.7<br>(-12.1,5.4)    |
| Argentina                 | 2401217<br>(2056469,2793030)  | 7241.8<br>(6184.8,8404.3)        | 3234945<br>(2748264,3848411) | 7019.8<br>(5893.6,8448.1)  | -3.1<br>(-12.6,7.3)    |
| Chile                     | 654433<br>(558825,785780)     | 5329.9<br>(4616.2,6309.1)        | 990775<br>(847405,1160035)   | 5196.4<br>(4391.5,6249.3)  | -2.5<br>(-10.8,6.6)    |
| Uruguay                   | 221568<br>(195396,251630)     | 6693.6<br>(5875.6,7703.3)        | 205339<br>(178243,237532)    | 5663.2<br>(4778.6,6765)    | -15.4<br>(-23.4,-8.4)  |
| High-income               | 24907789                      | 8986.5                           | 35609106                     | 9848.1                     | 9.6                    |

|                          |                                 |                             |                                 |                             |                        |
|--------------------------|---------------------------------|-----------------------------|---------------------------------|-----------------------------|------------------------|
| North America            | (21234419,29735299)             | (7533.2,10805)              | (31843996,39983534)             | (8624.3,11312.1)            | (1.2,19.2)             |
| Canada                   | 1424421<br>(1181401,1715394)    | 5369.6<br>(4412.7,6548.5)   | 1650337<br>(1381363,1967955)    | 4817.3<br>(3892.9,5970.9)   | -10.3<br>(-25.2,-1.9)  |
| United States of America | 23477765<br>(20002836,28076779) | 9374<br>(7857.8,11294.1)    | 33954468<br>(30347008,38109958) | 10399.3<br>(9140.3,11903.2) | 10.9<br>(2,21.4)       |
| Greenland                | 5034<br>(4016,5984)             | 10231.1<br>(8081.1,12146.2) | 3736<br>(3272,4293)             | 6702.3<br>(5767.3,7928)     | -34.5<br>(-41.7,-20.8) |
| Caribbean                | 2627837<br>(2201600,3160970)    | 7109.7<br>(6078.7,8417.2)   | 2736600<br>(2297598,3292308)    | 6072.6<br>(5048.5,7345.1)   | -14.6<br>(-18.4,-10.3) |
| Antigua and Barbuda      | 3370<br>(2642,4341)             | 5338.2<br>(4266.7,6817.6)   | 4281<br>(3485,5300)             | 5611.6<br>(4390.4,7155.6)   | 5.1<br>(-1.7,11.7)     |
| Bahamas                  | 14987<br>(12010,18587)          | 5582.2<br>(4560.8,6869.1)   | 19052<br>(15601,23533)          | 5660.2<br>(4491,7161.6)     | 1.4<br>(-6,9.5)        |
| Barbados                 | 16886<br>(14246,20256)          | 6747.6<br>(5681.4,8152.1)   | 17847<br>(14892,21186)          | 6878.8<br>(5508.2,8515.2)   | 1.9<br>(-8.6,15.1)     |
| Belize                   | 13506<br>(10851,17142)          | 6011.4<br>(5038.1,7353.5)   | 24260<br>(19296,30534)          | 5657.5<br>(4549,7101.4)     | -5.9<br>(-14.7,3.2)    |
| Cuba                     | 808383<br>(661439,988727)       | 7590.6<br>(6224.8,9387.2)   | 653775<br>(535739,791660)       | 6979.4<br>(5504.9,8790.4)   | -8.1<br>(-16.3,-0.4)   |
| Dominica                 | 5180<br>(4298,6332)             | 6708.6<br>(5684.1,8026.6)   | 4327<br>(3729,5082)             | 6834.4<br>(5762.7,8245.3)   | 1.9<br>(-3.8,7.4)      |
| Dominican Republic       | 328856<br>(267105,407417)       | 3933.5<br>(3275.5,4743.6)   | 420153<br>(335178,527757)       | 3858.6<br>(3093.3,4851.1)   | -1.9<br>(-12.3,9.7)    |
| Grenada                  | 6601<br>(5224,8351)             | 7094.8<br>(5720.5,8789.5)   | 6768<br>(5434,8402)             | 7097.2<br>(5663.9,8994.2)   | 0<br>(-7.5,7.7)        |
| Guyana                   | 55001<br>(45327,67075)          | 6701.1<br>(5741.2,7946.1)   | 48079<br>(39843,58263)          | 6206.8<br>(5127.5,7539)     | -7.4<br>(-13.5,-0.8)   |
| Haiti                    | 616839<br>(513398,746778)       | 8218.3<br>(7092.1,9611.4)   | 944674<br>(796000,1137376)      | 7086.5<br>(6059.9,8373)     | -13.8<br>(-18.9,-8.8)  |
| Jamaica                  | 175081<br>(142442,218619)       | 6714<br>(5616.7,8215)       | 146411<br>(117836,181759)       | 5691.6<br>(4485.7,7172.3)   | -15.2<br>(-24.1,-6.8)  |
| Saint Lucia              | 10661<br>(8565,13294)           | 7234.4<br>(6046.9,8719)     | 10518<br>(8966,12360)           | 6751.6<br>(5593.6,8238.9)   | -6.7<br>(-13.7,0.2)    |
| Saint Vincent and        | 7150                            | 5883.4                      | 5879                            | 5703.1                      | -3.1                   |



|                                  |                              |                             |                               |                            |                        |
|----------------------------------|------------------------------|-----------------------------|-------------------------------|----------------------------|------------------------|
| the Grenadines                   | (5696,9035)                  | (4840.7,7248.1)             | (4873,7271)                   | (4605.6,7224.5)            | (-9.4,3.8)             |
| Suriname                         | 23142<br>(18871,28887)       | 5557.8<br>(4633.2,6791)     | 29417<br>(23781,36861)        | 5360.3<br>(4298,6764.4)    | -3.6<br>(-11.2,4.3)    |
| Trinidad and Tobago              | 54227<br>(43661,67449)       | 4189.3<br>(3457.4,5149.2)   | 54667<br>(43023,68100)        | 4631.3<br>(3578.8,5962.6)  | 10.6<br>(-6.2,24.8)    |
| Bermuda                          | 2956<br>(2410,3630)          | 5534.5<br>(4391,6936.5)     | 2713<br>(2226,3335)           | 5842.8<br>(4499.5,7495.4)  | 5.6<br>(-2,13.5)       |
| Puerto Rico                      | 389421<br>(326050,461383)    | 10828.8<br>(9074.5,12841.4) | 243455<br>(202296,292121)     | 8571.1<br>(6736.9,10699.9) | -20.8<br>(-28.7,-13)   |
| Saint Kitts and Nevis            | 2662<br>(2124,3364)          | 6109.1<br>(5012.3,7552.7)   | 2897<br>(2322,3582)           | 5647.3<br>(4364.7,7149.5)  | -7.6<br>(-15.7,0.1)    |
| United States Virgin Islands     | 5387<br>(4343,6764)          | 5019.9<br>(4065.6,6267.6)   | 4724<br>(3919,5750)           | 5366.1<br>(4255.8,6754.2)  | 6.9<br>(0.5,13.5)      |
| Andean Latin America             | 2632200<br>(2037393,3368299) | 5459<br>(4308.7,6885.3)     | 2688039<br>(2008863,3586171)  | 4215.4<br>(3152.4,5621.4)  | -22.8<br>(-34,-11.2)   |
| Bolivia (Plurinational State of) | 459655<br>(351462,590009)    | 5363.5<br>(4229.6,6709.9)   | 559829<br>(420623,732214)     | 4250.7<br>(3250.1,5536.1)  | -20.7<br>(-30.7,-10.8) |
| Ecuador                          | 640099<br>(479397,830020)    | 5063.6<br>(3886,6475.3)     | 703958<br>(523152,942678)     | 3967<br>(2945.1,5332.2)    | -21.7<br>(-33.7,-8.7)  |
| Peru                             | 1532446<br>(1192069,1956088) | 5669.9<br>(4486.7,7165.5)   | 1424251<br>(1057717,1889703)  | 4335.6<br>(3189.8,5773.3)  | -23.5<br>(-36.3,-10.3) |
| Central Latin America            | 7842460<br>(6237000,9867953) | 4394.1<br>(3670,5344.1)     | 7921211<br>(6215577,10048175) | 3244.4<br>(2546.2,4160.4)  | -26.2<br>(-32.4,-19.8) |
| Colombia                         | 1605880<br>(1267081,2032068) | 4826.1<br>(3977.6,5909.6)   | 1551388<br>(1228472,1944968)  | 3478<br>(2729.2,4428.1)    | -27.9<br>(-35,-20.4)   |
| Costa Rica                       | 220713<br>(177445,271958)    | 6971.4<br>(5804.3,8480)     | 246652<br>(200613,304694)     | 5529.3<br>(4443.3,6905.5)  | -20.7<br>(-29.5,-11.8) |
| El Salvador                      | 524413<br>(400755,667852)    | 8741.7<br>(6849.1,10792.2)  | 337603<br>(272860,419278)     | 5419.4<br>(4395.3,6674.4)  | -38<br>(-47,-25.4)     |
| Guatemala                        | 529027<br>(427158,658830)    | 5135.9<br>(4304.9,6155.7)   | 547912<br>(420001,720467)     | 2865.8<br>(2258.4,3708.1)  | -44.2<br>(-52.8,-34.7) |
| Honduras                         | 338107<br>(271543,422419)    | 5433.4<br>(4551.7,6564.1)   | 404374<br>(317884,517982)     | 3778<br>(3053.7,4714.6)    | -30.5<br>(-38.3,-21.9) |

|                                          |                                 |                           |                                 |                           |                        |
|------------------------------------------|---------------------------------|---------------------------|---------------------------------|---------------------------|------------------------|
| Mexico                                   | 3193956<br>(2488868,4169496)    | 3534.9<br>(2901.9,4376.1) | 3353355<br>(2591663,4377729)    | 2765.1<br>(2128.8,3626)   | -21.8<br>(-28.6,-14.4) |
| Nicaragua                                | 288605<br>(222270,367502)       | 5784.4<br>(4734.5,7082)   | 255251<br>(199176,328146)       | 3790.6<br>(3008.7,4813)   | -34.5<br>(-43.2,-25.5) |
| Panama                                   | 142097<br>(116904,175401)       | 5396.9<br>(4514.5,6576.1) | 182693<br>(145350,229024)       | 4431.8<br>(3509.9,5574.7) | -17.9<br>(-28.1,-6.3)  |
| Venezuela<br>(Bolivarian<br>Republic of) | 999661<br>(785216,1272634)      | 4673<br>(3795.9,5791.3)   | 1041985<br>(829836,1304105)     | 3882.4<br>(3058.4,4893.5) | -16.9<br>(-25.3,-8.1)  |
| Tropical Latin<br>America                | 10113866<br>(7724946,13447079)  | 6003.2<br>(4699.4,7741.7) | 9896164<br>(7738019,12694179)   | 4907.3<br>(3771.5,6383.3) | -18.3<br>(-24.5,-12.6) |
| Brazil                                   | 9894735<br>(7559903,13161901)   | 6045.9<br>(4725.1,7807.7) | 9520211<br>(7444049,12180750)   | 4892.4<br>(3757.3,6352)   | -19.1<br>(-25.5,-13.5) |
| Paraguay                                 | 219131<br>(170124,288666)       | 4583.6<br>(3700.2,5780.5) | 375953<br>(293749,490425)       | 5408.1<br>(4227.8,7017.9) | 18<br>(8.8,26.9)       |
| North Africa and<br>Middle East          | 13463264<br>(11334327,16249057) | 4145.9<br>(3633.9,4786)   | 22132734<br>(18619787,26444040) | 3819.3<br>(3262.5,4512.7) | -7.9<br>(-12.4,-3.2)   |
| Algeria                                  | 777903<br>(640644,976466)       | 3171<br>(2723.3,3752.9)   | 1311915<br>(1073558,1613359)    | 3219.5<br>(2632.9,3923.9) | 1.5<br>(-8.2,11.5)     |
| Bahrain                                  | 19611<br>(16473,23653)          | 4485.5<br>(3915.7,5195.3) | 46333<br>(38382,56216)          | 3639.2<br>(2999,4452.8)   | -18.9<br>(-26.4,-11.6) |
| Egypt                                    | 2023077<br>(1676916,2471493)    | 3698<br>(3170.9,4332.3)   | 3347076<br>(2743236,4121162)    | 3486.8<br>(2903.2,4200.2) | -5.7<br>(-13.3,1.1)    |
| Iran (Islamic<br>Republic of)            | 2298639<br>(1871634,2861152)    | 4235.2<br>(3602.4,5012)   | 2635573<br>(2182430,3205594)    | 3280.1<br>(2717.3,3978.4) | -22.6<br>(-26.7,-18)   |
| Iraq                                     | 818213<br>(685131,1010795)      | 5006.8<br>(4413.9,5753.8) | 1451876<br>(1169492,1834319)    | 3446.5<br>(2875.1,4218.2) | -31.2<br>(-37.8,-24.2) |
| Jordan                                   | 155571<br>(121602,199269)       | 4273.3<br>(3560.6,5114.4) | 470579<br>(373465,600638)       | 4044.7<br>(3266.1,5037.9) | -5.4<br>(-13.2,5.3)    |
| Kuwait                                   | 74041<br>(59756,91927)          | 4470.8<br>(3734.6,5337.9) | 174109<br>(138549,221831)       | 4174.5<br>(3290.5,5265.1) | -6.6<br>(-18.1,6.2)    |
| Lebanon                                  | 143800<br>(119375,172411)       | 4514.7<br>(3828.8,5299.2) | 227323<br>(186845,274256)       | 4443.3<br>(3641.8,5385.8) | -1.6<br>(-10,7.9)      |
| Libya                                    | 167769                          | 4259.2                    | 235519                          | 3725.3                    | -12.5                  |

|                      |                                 |                           |                                 |                           |                        |
|----------------------|---------------------------------|---------------------------|---------------------------------|---------------------------|------------------------|
|                      | (136990,209553)                 | (3718.2,4984.9)           | (199456,282297)                 | (3122.6,4497)             | (-17.9,-7)             |
| Morocco              | 665780<br>(550850,810008)       | 2675.7<br>(2312.1,3124.7) | 1020288<br>(859393,1228507)     | 2914.6<br>(2452.5,3485.5) | 8.9<br>(0.8,16.6)      |
| Palestine            | 72287<br>(57157,93317)          | 3654.7<br>(3083.7,4340.7) | 167759<br>(130859,216935)       | 3332.4<br>(2715.9,4088.5) | -8.8<br>(-16.3,-1.5)   |
| Oman                 | 60553<br>(48051,78425)          | 3084<br>(2504.8,3817.5)   | 172075<br>(136810,218229)       | 4053.9<br>(3279.1,5014.4) | 31.4<br>(19.2,49.6)    |
| Qatar                | 14086<br>(11479,17566)          | 3410.6<br>(2829.3,4117.8) | 84800<br>(67146,108245)         | 3460.5<br>(2793.8,4306.1) | 1.5<br>(-7.1,9.8)      |
| Saudi Arabia         | 344119<br>(275108,439248)       | 2093<br>(1765.4,2507)     | 853996<br>(705952,1027815)      | 2642.2<br>(2154.9,3207.3) | 26.2<br>(16.5,40)      |
| Syrian Arab Republic | 430804<br>(356993,525828)       | 3348.3<br>(2925.6,3861.5) | 469399<br>(397789,559453)       | 3268.9<br>(2774.5,3868.8) | -2.4<br>(-8.8,4.7)     |
| Tunisia              | 290736<br>(241636,356963)       | 3603.3<br>(3107.9,4296)   | 412522<br>(348082,491379)       | 3640.2<br>(3020.5,4393.8) | 1<br>(-5.8,8.8)        |
| Turkey               | 3029326<br>(2586991,3670400)    | 5503.4<br>(4813.4,6430.5) | 4082370<br>(3517474,4743627)    | 5102.5<br>(4401.6,6040.7) | -7.3<br>(-14.1,-0.8)   |
| United Arab Emirates | 126457<br>(105116,150913)       | 8100.4<br>(6883.3,9295.8) | 614690<br>(514498,719007)       | 7179.9<br>(6188.3,8345.4) | -11.4<br>(-16.9,-4.4)  |
| Yemen                | 599901<br>(498756,737931)       | 4807.3<br>(4277.8,5430.5) | 1189810<br>(968154,1487503)     | 3946.6<br>(3401.3,4620.2) | -17.9<br>(-23.1,-12.3) |
| Afghanistan          | 498371<br>(428705,582821)       | 4740.1<br>(4210.7,5299.5) | 1515532<br>(1250584,1877887)    | 4281<br>(3758.8,4909)     | -9.7<br>(-14.3,-4.9)   |
| Sudan                | 843168<br>(682566,1031844)      | 4326.3<br>(3687.1,5084.3) | 1626705<br>(1297906,2051810)    | 4174.7<br>(3493.1,4976.2) | -3.5<br>(-11.1,4.5)    |
| South Asia           | 24040433<br>(20356738,28785094) | 2741.2<br>(2334.1,3211)   | 39871689<br>(33201510,47765389) | 2443.4<br>(2029.8,2909.8) | -10.9<br>(-17,-7.7)    |
| Bangladesh           | 1522763<br>(1338902,1747547)    | 1855.8<br>(1667.2,2057.8) | 2073478<br>(1801991,2362800)    | 1390.9<br>(1217.2,1574.2) | -25.1<br>(-29.6,-19.7) |
| Bhutan               | 9816<br>(8567,11266)            | 2022.2<br>(1811.3,2239)   | 9763<br>(8608,11051)            | 1429.8<br>(1272.3,1603)   | -29.3<br>(-34.1,-24)   |
| India                | 20333262<br>(17097406,24464734) | 2970.6<br>(2519.5,3502.3) | 34305973<br>(27950714,41323723) | 2680.9<br>(2189.6,3221.6) | -9.8<br>(-16.7,-6.2)   |
| Nepal                | 191969                          | 1254                      | 289923                          | 1072.5                    | -14.5                  |

|                                  |                                |                            |                                 |                           |                        |
|----------------------------------|--------------------------------|----------------------------|---------------------------------|---------------------------|------------------------|
|                                  | (168075,220532)                | (1117.3,1405.5)            | (249851,332070)                 | (932.4,1214.8)            | (-19.7,-9.1)           |
| Pakistan                         | 1982623<br>(1669903,2383033)   | 2133.3<br>(1826,2475.1)    | 3192552<br>(2659807,3848337)    | 1702.1<br>(1448.1,1974.8) | -20.2<br>(-23.1,-16.7) |
| Central Sub-Saharan Africa       | 2111203<br>(1737056,2594521)   | 3664.9<br>(3189.1,4228.2)  | 4117823<br>(3355827,5095414)    | 3081.7<br>(2653.8,3633.4) | -15.9<br>(-19.9,-11.2) |
| Angola                           | 473612<br>(399474,576302)      | 4472.7<br>(3958.7,5120.3)  | 987366<br>(784259,1232058)      | 3140.1<br>(2694,3682.6)   | -29.8<br>(-35.4,-24.1) |
| Central African Republic         | 118621<br>(100637,141253)      | 4409.9<br>(3923.3,4972.7)  | 183039<br>(152909,221751)       | 3476.8<br>(3045.2,3965.7) | -21.2<br>(-24.9,-17.4) |
| Congo                            | 107611<br>(89540,130973)       | 4496.1<br>(3934.3,5172.4)  | 191764<br>(156525,236966)       | 3717.6<br>(3167.4,4387.3) | -17.3<br>(-22.9,-11.6) |
| Democratic Republic of the Congo | 1360068<br>(1097868,1692027)   | 3342.8<br>(2865.7,3903.8)  | 2664393<br>(2183112,3293446)    | 3003.4<br>(2582.8,3545.4) | -10.2<br>(-15,-4.1)    |
| Equatorial Guinea                | 17470<br>(14647,21190)         | 4004.7<br>(3518.5,4559.1)  | 43537<br>(33747,55835)          | 3028<br>(2529.2,3664.2)   | -24.4<br>(-31.4,-17.1) |
| Gabon                            | 33822<br>(28053,41413)         | 3454.6<br>(2986.1,4055.4)  | 47724<br>(38513,60950)          | 2736.5<br>(2258.4,3395)   | -20.8<br>(-27.3,-14)   |
| Eastern Sub-Saharan Africa       | 10200333<br>(8503358,12613584) | 5133.9<br>(4490.9,5952.1)  | 17781817<br>(14422770,22250549) | 4151.2<br>(3582.1,4898.7) | -19.1<br>(-22.6,-15.2) |
| Burundi                          | 344827<br>(289564,413622)      | 6006.6<br>(5296,6776)      | 517185<br>(419705,636973)       | 4142.9<br>(3585.5,4806.9) | -31<br>(-35.4,-26.9)   |
| Comoros                          | 23464<br>(19701,28536)         | 4807.4<br>(4195.5,5604.7)  | 29194<br>(24318,35464)          | 4061.9<br>(3450.4,4841.6) | -15.5<br>(-22.2,-9.2)  |
| Djibouti                         | 26428<br>(21824,32455)         | 5245.5<br>(4563.1,6057)    | 48835<br>(40330,59712)          | 4132.7<br>(3519.3,4912.8) | -21.2<br>(-26.8,-15.1) |
| Eritrea                          | 161786<br>(135704,194610)      | 5360.6<br>(4737.8,6074.4)  | 294185<br>(245719,357430)       | 4403.8<br>(3837,5096.1)   | -17.8<br>(-22.3,-12.9) |
| Ethiopia                         | 1989811<br>(1603190,2509503)   | 3780.6<br>(3205.9,4489.3)  | 3249237<br>(2524664,4200802)    | 2791.6<br>(2299.3,3414.2) | -26.2<br>(-31.3,-20.2) |
| Kenya                            | 775052<br>(610440,1000263)     | 3221.2<br>(2698.5,3856)    | 1418420<br>(1122230,1798200)    | 2730.2<br>(2259.2,3321.3) | -15.2<br>(-17.5,-12.7) |
| Madagascar                       | 1321024<br>(1136958,1544897)   | 9951.6<br>(8841.9,11236.9) | 1735901<br>(1490585,2034248)    | 6355.9<br>(5633.6,7165.8) | -36.1<br>(-40.3,-31.4) |

|                                 |                              |                                  |                                 |                           |                        |
|---------------------------------|------------------------------|----------------------------------|---------------------------------|---------------------------|------------------------|
| Malawi                          | 412315<br>(330979,519276)    | 4023.5<br>(3426,4706)            | 719451<br>(565657,901924)       | 3707.2<br>(3090.3,4431.6) | -7.9<br>(-13.6,-1.7)   |
| Mozambique                      | 622611<br>(515046,768083)    | 4301.4<br>(3745.8,5011.2)        | 1329709<br>(1075478,1671938)    | 4312.9<br>(3736.1,5066.2) | 0.3<br>(-5.9,7)        |
| Rwanda                          | 869272<br>(723189,1040145)   | 12041.8<br>(10348.7,13779.9<br>) | 1013743<br>(843675,1238599)     | 8203.9<br>(7081.2,9666)   | -31.9<br>(-37.4,-25)   |
| Somalia                         | 428873<br>(360946,524617)    | 5833.4<br>(5168.4,6666.1)        | 917608<br>(755095,1135566)      | 4453<br>(3914.5,5133)     | -23.7<br>(-27.7,-19.2) |
| United Republic<br>of Tanzania  | 1661671<br>(1340860,2072273) | 6190<br>(5266.2,7300.7)          | 3509358<br>(2815093,4429076)    | 5923.5<br>(5047.9,7127.7) | -4.3<br>(-9.6,1.2)     |
| Uganda                          | 1060939<br>(864545,1333995)  | 5822.3<br>(5049.9,6843.4)        | 2136099<br>(1682331,2750153)    | 4952.6<br>(4216.7,5881.6) | -14.9<br>(-20.7,-8.7)  |
| Zambia                          | 199391<br>(160973,250481)    | 2340.8<br>(2011.5,2747.6)        | 459061<br>(353763,602972)       | 2304.1<br>(1889.1,2844.5) | -1.6<br>(-9.7,8.3)     |
| South Sudan                     | 295384<br>(244982,362764)    | 4839.1<br>(4210.6,5632.8)        | 389615<br>(313999,490360)       | 3963.9<br>(3390,4680.3)   | -18.1<br>(-22.7,-12.6) |
| Southern Sub-<br>Saharan Africa | 2088211<br>(1464725,2665580) | 4135.8<br>(2966.2,5083.7)        | 2662794<br>(1922876,3414012)    | 3476.2<br>(2532.4,4396.6) | -15.9<br>(-22.5,-10)   |
| Botswana                        | 28782<br>(24204,34738)       | 2497.1<br>(2199.8,2832.9)        | 56626<br>(46319,68640)          | 2572.8<br>(2165.5,3052.4) | 3<br>(-6.7,18.5)       |
| Lesotho                         | 22889<br>(18971,27418)       | 1341<br>(1162,1530)              | 27208<br>(23277,31480)          | 1377.1<br>(1185.7,1567.7) | 2.7<br>(-3,8.8)        |
| Namibia                         | 31445<br>(26714,37669)       | 2489.3<br>(2191.2,2850.5)        | 47132<br>(39200,57783)          | 2096.9<br>(1800.7,2468.9) | -15.8<br>(-20.6,-9.7)  |
| South Africa                    | 1796364<br>(1181000,2313975) | 4970.2<br>(3355.2,6224)          | 2219861<br>(1485832,2910877)    | 4124<br>(2788,5399.2)     | -17<br>(-24.9,-9.8)    |
| Eswatini                        | 34986<br>(29498,42264)       | 5161.2<br>(4529.1,5816.1)        | 46774<br>(40350,54756)          | 4646.9<br>(4078.1,5220.7) | -10<br>(-14.2,-5.4)    |
| Zimbabwe                        | 173744<br>(140921,218376)    | 1915.4<br>(1669.6,2217.4)        | 265194<br>(219778,321809)       | 1990<br>(1728.1,2286.7)   | 3.9<br>(-0.9,8.7)      |
| Western Sub-<br>Saharan Africa  | 6952062<br>(5732499,8617231) | 3770.3<br>(3254.1,4414.7)        | 14052637<br>(11321219,17960481) | 3087.3<br>(2629,3669.7)   | -18.1<br>(-21,-15)     |
| Benin                           | 149531                       | 3241.9                           | 345397                          | 2783.4                    | -14.1                  |

|                       |                              |                           |                              |                           |                        |
|-----------------------|------------------------------|---------------------------|------------------------------|---------------------------|------------------------|
|                       | (123695,182224)              | (2874.7,3694.5)           | (275121,436254)              | (2387.2,3274.7)           | (-19.6,-8.7)           |
| Burkina Faso          | 265313<br>(212800,336830)    | 2595.5<br>(2228.4,3056.8) | 615592<br>(487310,799997)    | 2586.1<br>(2178.5,3125.8) | -0.4<br>(-5.9,5.6)     |
| Cameroon              | 262619<br>(213036,328473)    | 2694.4<br>(2310.9,3168.3) | 679955<br>(536381,880881)    | 2325.8<br>(1937.9,2835.7) | -13.7<br>(-20.3,-6.8)  |
| Cabo Verde            | 10691<br>(8686,13395)        | 3046.6<br>(2631.6,3583.5) | 13527<br>(11061,16913)       | 2443.6<br>(2020.5,3024.7) | -19.8<br>(-26.3,-12.6) |
| Chad                  | 137722<br>(112144,172438)    | 2320.1<br>(2009.5,2722.8) | 371908<br>(292030,479772)    | 2161.7<br>(1838.5,2574.2) | -6.8<br>(-12.3,-0.6)   |
| Côte d'Ivoire         | 394613<br>(324191,487962)    | 3450.9<br>(2993.9,4035.4) | 805617<br>(658270,1010962)   | 3154.3<br>(2690.7,3760.8) | -8.6<br>(-14.2,-2.7)   |
| Gambia                | 29420<br>(23910,36444)       | 3217.6<br>(2822.5,3745.4) | 60978<br>(49112,76401)       | 2791.5<br>(2400,3300.5)   | -13.2<br>(-18.1,-8.1)  |
| Ghana                 | 314077<br>(250560,395456)    | 2037.4<br>(1731.9,2412.1) | 667512<br>(541608,840813)    | 2118.8<br>(1785.7,2580.9) | 4<br>(-1.9,9.5)        |
| Guinea                | 224458<br>(183775,275830)    | 3690.3<br>(3154.8,4346.6) | 422769<br>(336844,536671)    | 3373<br>(2835.3,3999.1)   | -8.6<br>(-14.8,-2.1)   |
| Guinea-Bissau         | 35844<br>(30228,43000)       | 3917.1<br>(3485.2,4395.9) | 56299<br>(46912,68780)       | 3123.2<br>(2760.7,3618.1) | -20.3<br>(-24.9,-14.8) |
| Liberia               | 59316<br>(48522,74831)       | 2714.1<br>(2351.7,3235.4) | 115412<br>(91514,147962)     | 2334.4<br>(1955.6,2853)   | -14<br>(-21.9,-7.4)    |
| Mali                  | 180948<br>(148099,227712)    | 2128.3<br>(1835.5,2502.5) | 480575<br>(382960,628685)    | 2140.5<br>(1829,2567.7)   | 0.6<br>(-4.7,6.1)      |
| Mauritania            | 105882<br>(86145,128861)     | 5666.6<br>(4812.3,6590.4) | 180653<br>(147063,225869)    | 4687.1<br>(4033.8,5506.4) | -17.3<br>(-24,-8.5)    |
| Niger                 | 273989<br>(227372,340374)    | 3410.2<br>(3015.8,3943)   | 654110<br>(519223,840418)    | 2713.1<br>(2339,3202.4)   | -20.4<br>(-25.6,-14.9) |
| Nigeria               | 4054612<br>(3334023,5015411) | 4727.2<br>(4045.7,5589.3) | 7720070<br>(6110405,9942614) | 3626.9<br>(3065.9,4365.7) | -23.3<br>(-26.2,-20)   |
| Sao Tome and Principe | 6003<br>(5012,7137)          | 4980.7<br>(4394.4,5641.6) | 8041<br>(6908,9563)          | 4253.7<br>(3782.3,4849.6) | -14.6<br>(-20,-8.5)    |
| Senegal               | 186394<br>(153563,232840)    | 2517.1<br>(2183.9,2939.2) | 348822<br>(278481,440631)    | 2318.2<br>(1960.1,2780)   | -7.9<br>(-14.8,-1.9)   |
| Sierra Leone          | 117406                       | 3188.3                    | 229112                       | 2768.1                    | -13.2                  |

|      |                           |                       |                           |                           |                       |
|------|---------------------------|-----------------------|---------------------------|---------------------------|-----------------------|
|      | (98452,141760)            | (2825.3,3660.7)       | (187284,285128)           | (2394,3284.1)             | (-18.6,-7.3)          |
| Togo | 142993<br>(115812,178027) | 4210.1<br>(3608,4911) | 276092<br>(225766,346222) | 3616.7<br>(3068.8,4309.6) | -14.1<br>(-20.5,-6.7) |

SDI=socio-demographic index. 95% UI=95% uncertainty interval.

**Table S3.** Disability-adjusted life-years due to asthma in 1990 and 2019 for both sexes and percentage change in age-standardized rates by location.

| DALYs of Asthma                       | 1990                            |                         | 2019                            |                        | Percentage change in age-standardized rates between 1990 and 2019 |
|---------------------------------------|---------------------------------|-------------------------|---------------------------------|------------------------|-------------------------------------------------------------------|
|                                       | Counts(95% UI)                  | Rate(95% UI)            | Counts(95% UI)                  | Rate(95% UI)           |                                                                   |
| Global                                | 22321084<br>(17909501,27344230) | 476.3<br>(378.5,579.6)  | 21550977<br>(17141587,26971997) | 273.6<br>(216.7,343.4) | -42.5<br>(-48.5,-36.6)                                            |
| High SDI                              | 3572724<br>(2631002,4836496)    | 409.3<br>(295.9,561.9)  | 3002226<br>(2091655,4202058)    | 293.7<br>(200.7,419.4) | -28.2<br>(-33.6,-24.1)                                            |
| High-middle SDI                       | 3163145<br>(2458707,4106995)    | 286.8<br>(224.3,369.4)  | 2353926<br>(1761732,3168080)    | 158.3<br>(114,220.2)   | -44.8<br>(-51.8,-38.4)                                            |
| Low SDI                               | 3423410<br>(2640397,4076914)    | 958.7<br>(705.1,1243.8) | 4188658<br>(3320170,5258768)    | 553.9<br>(434.7,726.8) | -42.2<br>(-48.9,-33)                                              |
| Low-middle SDI                        | 6478626<br>(4865662,8029063)    | 859.4<br>(615.5,1143.2) | 6558233<br>(5191112,7974147)    | 445.9<br>(348.5,546.3) | -48.1<br>(-57.1,-39.5)                                            |
| Middle SDI                            | 5665089<br>(4635917,6912160)    | 419.9<br>(341.9,508.8)  | 5429478<br>(4363001,6758390)    | 230.6<br>(183.8,290.3) | -45.1<br>(-54,-36.8)                                              |
| East Asia                             | 2138378<br>(1608332,2801495)    | 215.9<br>(165.9,279.9)  | 1528079<br>(1141964,2062500)    | 106.4<br>(75.3,152.1)  | -50.7<br>(-63.6,-38.8)                                            |
| China                                 | 2004544<br>(1501975,2635017)    | 209.2<br>(159.6,272.3)  | 1413152<br>(1052301,1918822)    | 102.8<br>(72.3,147.4)  | -50.9<br>(-64.3,-38.4)                                            |
| Democratic People's Republic of Korea | 64340<br>(47510,83425)          | 361.7<br>(268.3,468.8)  | 73232<br>(53619,95448)          | 256.5<br>(188.6,336.5) | -29.1<br>(-42.1,-14.4)                                            |
| Taiwan (Province of China)            | 69494<br>(57199,85758)          | 418.6<br>(351.1,503.6)  | 41696<br>(30471,56440)          | 168.8<br>(117.5,238)   | -59.7<br>(-68.1,-50)                                              |
| Southeast Asia                        | 2963731<br>(2454784,3411031)    | 860.9<br>(699.3,995.4)  | 2678719<br>(2252869,3164506)    | 433.2<br>(365.4,509.7) | -49.7<br>(-56.8,-41.3)                                            |
| Cambodia                              | 49435<br>(37804,60138)          | 696.6<br>(531.1,827.6)  | 48945<br>(39096,60142)          | 368.4<br>(297,448.7)   | -47.1<br>(-58,-33.3)                                              |
| Indonesia                             | 1116448<br>(914322,1293965)     | 797.6<br>(661,954.7)    | 1044984<br>(853096,1263065)     | 455.6<br>(372.9,549.5) | -42.9<br>(-52.1,-32.8)                                            |
| Lao People's                          | 51694                           | 1554.2                  | 30179                           | 562                    | -63.8                                                             |



|                                  |                           |                           |                           |                           |                        |
|----------------------------------|---------------------------|---------------------------|---------------------------|---------------------------|------------------------|
| Democratic Republic              | (36878,67653)             | (1146.9,1932.5)           | (22655,38817)             | (421.9,729.9)             | (-73.8,-49.5)          |
| Malaysia                         | 66041<br>(53604,78907)    | 531<br>(439.9,623.8)      | 56919<br>(43122,73572)    | 192.9<br>(146.2,251.1)    | -63.7<br>(-71.8,-52.7) |
| Maldives                         | 1200<br>(832,1644)        | 686.6<br>(485.2,902.7)    | 660<br>(485,900)          | 167.5<br>(125.4,222.3)    | -75.6<br>(-83,-64.3)   |
| Myanmar                          | 547269<br>(399441,696313) | 1859.8<br>(1293.9,2341.7) | 313651<br>(238291,390682) | 664.5<br>(500.4,822)      | -64.3<br>(-73.6,-51.9) |
| Philippines                      | 497293<br>(412758,594828) | 989.6<br>(858.6,1143.6)   | 576673<br>(479743,693346) | 589<br>(493,696.5)        | -40.5<br>(-48.8,-30.2) |
| Sri Lanka                        | 166276<br>(142216,186780) | 1524.5<br>(1308.9,1708.2) | 166925<br>(124625,211782) | 726.9<br>(539.7,914.9)    | -52.3<br>(-64.6,-38.6) |
| Thailand                         | 201758<br>(160922,246728) | 469.8<br>(377,565.8)      | 171925<br>(131779,222441) | 225.6<br>(170.6,298.5)    | -52<br>(-63.2,-40)     |
| Timor-Leste                      | 6805<br>(4358,9732)       | 1096<br>(789.2,1414.1)    | 5657<br>(3989,7397)       | 542.7<br>(394,724.4)      | -50.5<br>(-64.6,-32.4) |
| Viet Nam                         | 247687<br>(136441,322503) | 508.2<br>(248.4,680.4)    | 254205<br>(164896,324342) | 282.3<br>(183.5,357.8)    | -44.5<br>(-62.8,-22.5) |
| Mauritius                        | 7648<br>(6717,8566)       | 940.2<br>(825.2,1044.4)   | 4249<br>(3386,5326)       | 301.6<br>(237.5,374.2)    | -67.9<br>(-73.8,-59)   |
| Seychelles                       | 238<br>(197,293)          | 379.1<br>(313.5,471.1)    | 237<br>(184,299)          | 232.3<br>(178.5,296)      | -38.7<br>(-48.5,-29.2) |
| Oceania                          | 62337<br>(51098,77908)    | 1610.9<br>(1286.3,2090.8) | 95043<br>(74135,122199)   | 1102.2<br>(863.7,1431.3)  | -31.6<br>(-45,-15.7)   |
| Fiji                             | 8980<br>(7294,10925)      | 2081.4<br>(1684.1,2534)   | 7347<br>(5824,9217)       | 979.9<br>(780.2,1226.8)   | -52.9<br>(-66.3,-35.7) |
| Kiribati                         | 1228<br>(1022,1460)       | 2630.9<br>(2188,3178.8)   | 1362<br>(1088,1704)       | 1795.1<br>(1411.4,2242.2) | -31.8<br>(-47.7,-13.5) |
| Marshall Islands                 | 286<br>(222,384)          | 1163.8<br>(891.4,1631.5)  | 299<br>(216,400)          | 707.4<br>(507.6,938.8)    | -39.2<br>(-54.5,-21.6) |
| Micronesia (Federated States of) | 828<br>(638,1046)         | 1333.3<br>(1019.5,1786.1) | 535<br>(379,711)          | 689.6<br>(503.9,921.3)    | -48.3<br>(-66.1,-27.2) |
| Papua New                        | 41834                     | 1716.8                    | 73541                     | 1250.3                    | -27.2                  |

|                          |                           |                          |                           |                         |                        |
|--------------------------|---------------------------|--------------------------|---------------------------|-------------------------|------------------------|
| Guinea                   | (32424,54217)             | (1319,2334.9)            | (55513,96924)             | (941.2,1697.6)          | (-42.9,-7.8)           |
| Samoa                    | 981<br>(743,1331)         | 929.9<br>(695.6,1286.6)  | 838<br>(646,1072)         | 507.5<br>(399.3,644.9)  | -45.4<br>(-62.4,-25.2) |
| Solomon Islands          | 2389<br>(1854,3077)       | 1292.6<br>(961.1,1676.5) | 3779<br>(2890,4772)       | 933.1<br>(688.9,1182.3) | -27.8<br>(-46.7,-5.6)  |
| Tonga                    | 384<br>(304,497)          | 552.9<br>(448.2,697.1)   | 326<br>(248,411)          | 360.7<br>(278.4,446.8)  | -34.8<br>(-49.1,-18.5) |
| Vanuatu                  | 1021<br>(708,1448)        | 1147.6<br>(778.3,1712.6) | 1659<br>(1219,2287)       | 791.4<br>(577.5,1103.5) | -31<br>(-48.1,-8)      |
| American Samoa           | 174<br>(142,216)          | 554.2<br>(461.5,668.7)   | 167<br>(131,212)          | 334.7<br>(265.1,423.5)  | -39.6<br>(-53.3,-26)   |
| Cook Islands             | 70<br>(54,88)             | 456.8<br>(359.4,566.1)   | 48<br>(35,63)             | 243.6<br>(176.5,322.5)  | -46.7<br>(-57.6,-35.5) |
| Guam                     | 324<br>(240,441)          | 316.2<br>(247.7,404.3)   | 365<br>(267,490)          | 210.9<br>(154,286)      | -33.3<br>(-42.7,-24.8) |
| Nauru                    | 62<br>(46,79)             | 975.8<br>(733.1,1212.5)  | 41<br>(28,54)             | 591.7<br>(395.7,770.2)  | -39.4<br>(-54.5,-22.1) |
| Niue                     | 14<br>(11,17)             | 625.4<br>(475.7,769.4)   | 7<br>(5,9)                | 349.2<br>(244.7,460.2)  | -44.2<br>(-57.6,-29.8) |
| Northern Mariana Islands | 128<br>(96,165)           | 416.9<br>(336.2,514.1)   | 105<br>(79,135)           | 254.5<br>(192.3,336)    | -39<br>(-50.1,-27.2)   |
| Palau                    | 71<br>(56,90)             | 613<br>(487.2,763.8)     | 70<br>(55,87)             | 375.8<br>(300.1,462.9)  | -38.7<br>(-52.2,-22.6) |
| Tokelau                  | 13<br>(10,17)             | 904.3<br>(684.5,1193.7)  | 5<br>(4,7)                | 410.8<br>(307.7,530.7)  | -54.6<br>(-67.2,-39.1) |
| Tuvalu                   | 100<br>(75,128)           | 1324.7<br>(975.5,1752.2) | 59<br>(45,76)             | 567.6<br>(435.1,730.3)  | -57.1<br>(-69.7,-39.4) |
| Central Asia             | 174813<br>(143587,212412) | 324.2<br>(270.1,387.1)   | 160741<br>(126601,204693) | 198<br>(160,246)        | -38.9<br>(-48.1,-27.4) |
| Armenia                  | 3931<br>(2868,5359)       | 127.1<br>(94.5,167.8)    | 2782<br>(1850,3988)       | 91.1<br>(59.1,136)      | -28.4<br>(-43.6,-14.5) |
| Azerbaijan               | 16183<br>(12998,20076)    | 285.3<br>(231.6,352.1)   | 15681<br>(11998,21013)    | 172.4<br>(131.6,236)    | -39.6<br>(-54.8,-19.6) |
| Georgia                  | 13772                     | 236                      | 5102                      | 125.3                   | -46.9                  |

|                        |                           |                        |                           |                        |                        |
|------------------------|---------------------------|------------------------|---------------------------|------------------------|------------------------|
|                        | (11501,16262)             | (197,281.6)            | (3991,6522)               | (95.6,167.9)           | (-55.6,-36.8)          |
| Kazakhstan             | 40587<br>(32385,50665)    | 301.6<br>(238.8,378.2) | 37623<br>(29571,46982)    | 221<br>(173.5,275.6)   | -26.7<br>(-41,-9.4)    |
| Kyrgyzstan             | 9754<br>(7538,12453)      | 263.5<br>(207.6,330.6) | 7744<br>(5436,11034)      | 126.3<br>(91.5,175.8)  | -52<br>(-60.8,-41)     |
| Mongolia               | 5445<br>(4275,6822)       | 426.5<br>(337.6,534.8) | 5112<br>(3851,6787)       | 197.2<br>(152.5,257.4) | -53.8<br>(-64.8,-35.8) |
| Tajikistan             | 11604<br>(9015,15151)     | 347.1<br>(265.7,450.8) | 12762<br>(9476,17028)     | 224.3<br>(175.2,279)   | -35.4<br>(-51.4,-17.5) |
| Turkmenistan           | 10615<br>(8151,13172)     | 384.2<br>(294.2,473.4) | 5536<br>(3855,7774)       | 113.7<br>(78.8,159.2)  | -70.4<br>(-78.3,-56.1) |
| Uzbekistan             | 62922<br>(48490,79005)    | 446.9<br>(347.3,553.2) | 68396<br>(52527,88502)    | 265.5<br>(209.7,351.7) | -40.6<br>(-52.7,-22.4) |
| Central Europe         | 425867<br>(321545,569652) | 317.7<br>(236.9,429.3) | 226328<br>(157240,318448) | 180.5<br>(119.9,263.9) | -43.2<br>(-50.5,-36.8) |
| Albania                | 7186<br>(5866,8891)       | 301.9<br>(248.2,364.1) | 5376<br>(3990,6982)       | 165.9<br>(121,222.8)   | -45.1<br>(-57,-30.2)   |
| Bosnia and Herzegovina | 9673<br>(6654,13670)      | 226.5<br>(158.7,317.3) | 7074<br>(4809,9974)       | 189.8<br>(125.7,279)   | -16.2<br>(-26.4,-7.4)  |
| Bulgaria               | 21141<br>(15574,28268)    | 213.7<br>(153.8,294.4) | 11039<br>(7404,15928)     | 149.9<br>(96.6,220.6)  | -29.9<br>(-38.8,-21.5) |
| Croatia                | 15592<br>(11554,20822)    | 282.1<br>(206,382.4)   | 7981<br>(5381,11339)      | 166.3<br>(109,248.9)   | -41<br>(-49.4,-33.8)   |
| Czechia                | 19864<br>(15127,26233)    | 179.8<br>(134.4,243)   | 14941<br>(10281,20862)    | 133.9<br>(88.5,197.1)  | -25.5<br>(-35.4,-17.4) |
| Hungary                | 25451<br>(19410,33619)    | 218.9<br>(162.2,296.7) | 14627<br>(10149,20479)    | 143.6<br>(95.9,212.3)  | -34.4<br>(-43.3,-26.6) |
| North Macedonia        | 7807<br>(5691,10565)      | 417.9<br>(306,561.2)   | 5716<br>(4059,7896)       | 234.6<br>(163.1,335.2) | -43.9<br>(-53.1,-33.2) |
| Montenegro             | 869<br>(569,1280)         | 139.1<br>(91.5,205.4)  | 946<br>(616,1393)         | 148.4<br>(94.7,223.3)  | 6.7<br>(-1.3,15.9)     |
| Poland                 | 213272<br>(158931,285072) | 516.4<br>(381.6,697.3) | 94665<br>(64842,135619)   | 226.4<br>(149.1,333.7) | -56.2<br>(-62.1,-50.5) |
| Romania                | 65715                     | 260.5                  | 36814                     | 176                    | -32.4                  |

|                             |                           |                        |                           |                        |                        |
|-----------------------------|---------------------------|------------------------|---------------------------|------------------------|------------------------|
|                             | (48626,87952)             | (190.8,354.1)          | (25024,52757)             | (114.2,260.6)          | (-44.2,-20.4)          |
| Serbia                      | 24716<br>(19473,31463)    | 246<br>(193.1,316.5)   | 15683<br>(11886,20508)    | 149.2<br>(107.3,206.2) | -39.4<br>(-50.1,-29.4) |
| Slovakia                    | 8679<br>(6393,11939)      | 159.3<br>(116,220.8)   | 7225<br>(4956,10217)      | 127.1<br>(84,186.7)    | -20.2<br>(-29.9,-11.8) |
| Slovenia                    | 5901<br>(4142,8135)       | 275.5<br>(191.3,384.8) | 4241<br>(2797,6139)       | 187.6<br>(120.4,281.1) | -31.9<br>(-39.3,-24.7) |
| Eastern Europe              | 724349<br>(565591,926981) | 288.5<br>(221.5,374.9) | 260765<br>(184395,363884) | 124.1<br>(84.1,182.6)  | -57<br>(-63.6,-50.2)   |
| Belarus                     | 43147<br>(33703,55114)    | 366<br>(283.2,470.2)   | 15367<br>(10345,21798)    | 152.3<br>(100.8,222.1) | -58.4<br>(-67.2,-49.5) |
| Estonia                     | 3730<br>(3049,4557)       | 208.2<br>(166.9,258.1) | 1537<br>(1145,2026)       | 103.9<br>(72.3,147.1)  | -50.1<br>(-59.4,-41.1) |
| Latvia                      | 9526<br>(7454,12148)      | 309.4<br>(238.3,401.4) | 2997<br>(2124,4115)       | 144<br>(97.4,207)      | -53.4<br>(-62,-44.9)   |
| Lithuania                   | 7953<br>(6079,10339)      | 197.5<br>(148.6,260.2) | 3561<br>(2535,4922)       | 121<br>(82.4,176.8)    | -38.7<br>(-49.3,-27.9) |
| Republic of<br>Moldova      | 9826<br>(7391,12868)      | 218.4<br>(164.1,285.9) | 4484<br>(3061,6340)       | 120.4<br>(79.2,179)    | -44.9<br>(-54.6,-35.1) |
| Russian<br>Federation       | 523864<br>(415102,660889) | 312.5<br>(244.2,399.7) | 176661<br>(126447,243570) | 118.4<br>(81.2,172.5)  | -62.1<br>(-68.1,-55.7) |
| Ukraine                     | 126303<br>(88273,173074)  | 227.6<br>(157.9,318.4) | 56159<br>(37711,81009)    | 138.9<br>(90.2,208.9)  | -39<br>(-47.5,-29.5)   |
| High-income<br>Asia Pacific | 741940<br>(558145,981375) | 409.5<br>(306.2,543.3) | 335832<br>(237183,464856) | 160.3<br>(105.9,237.6) | -60.9<br>(-66.9,-54.8) |
| Brunei<br>Darussalam        | 852<br>(662,1075)         | 681.4<br>(534.1,818.1) | 966<br>(719,1315)         | 327.5<br>(255.9,419.8) | -51.9<br>(-60.6,-41.1) |
| Japan                       | 556143<br>(406081,752328) | 401.3<br>(289.8,546.6) | 222042<br>(151711,311870) | 161.2<br>(104.8,241.8) | -59.8<br>(-65.1,-54.6) |
| Republic of<br>Korea        | 173435<br>(132845,210584) | 645.6<br>(465.2,764.3) | 103987<br>(76946,139187)  | 178.5<br>(126.1,251.8) | -72.3<br>(-79.2,-60.8) |
| Singapore                   | 11510<br>(8764,15034)     | 415.8<br>(319,536.9)   | 8838<br>(5943,12757)      | 159<br>(104.5,235.5)   | -61.8<br>(-69.1,-53.7) |
| Australasia                 | 120760                    | 593.5                  | 101067                    | 360                    | -39.3                  |

|                |                              |                        |                             |                        |                        |
|----------------|------------------------------|------------------------|-----------------------------|------------------------|------------------------|
|                | (88983,162236)               | (433.7,802.1)          | (69220,144907)              | (239,527.6)            | (-48.2,-29.4)          |
| Australia      | 96896<br>(71449,129113)      | 576.5<br>(421.3,775.2) | 88700<br>(60370,126894)     | 373.8<br>(245.5,549.8) | -35.2<br>(-46,-22.6)   |
| New Zealand    | 23865<br>(17124,32926)       | 681.7<br>(485.4,951.8) | 12366<br>(8615,17552)       | 283.9<br>(193,416.2)   | -58.4<br>(-62.1,-54.3) |
| Western Europe | 1768804<br>(1290273,2415171) | 396.4<br>(284.2,551.6) | 1150103<br>(785822,1641190) | 245.6<br>(162.9,361.9) | -38<br>(-44.3,-32.3)   |
| Andorra        | 176<br>(120,252)             | 316.1<br>(215.9,450.1) | 217<br>(147,316)            | 246<br>(164,361.1)     | -22.2<br>(-29.8,-15)   |
| Austria        | 31623<br>(23039,42774)       | 343.2<br>(246.7,472.7) | 20180<br>(13439,29408)      | 212.9<br>(138.3,318.2) | -38<br>(-46.8,-29.9)   |
| Belgium        | 43120<br>(31724,58381)       | 364.9<br>(265.7,501.5) | 23702<br>(16433,33248)      | 196<br>(131.2,285.6)   | -46.3<br>(-54,-38.3)   |
| Cyprus         | 3095<br>(2175,4273)          | 406.7<br>(289,558.4)   | 4237<br>(2832,6127)         | 299.4<br>(199.2,439.9) | -26.4<br>(-36.6,-17.8) |
| Denmark        | 18923<br>(14008,25206)       | 318.1<br>(231.7,432.1) | 12226<br>(8319,17633)       | 201.8<br>(133.4,295.3) | -36.6<br>(-45.1,-27.7) |
| Finland        | 16159<br>(11233,22817)       | 294.1<br>(201.3,422.7) | 16007<br>(10916,22499)      | 250.3<br>(163.9,365.9) | -14.9<br>(-22.1,-8)    |
| France         | 289899<br>(205938,396711)    | 442.7<br>(311.2,615.7) | 195295<br>(132743,280865)   | 272.4<br>(180.1,401.4) | -38.5<br>(-46,-30.1)   |
| Germany        | 390373<br>(299289,513744)    | 391.2<br>(295.6,523)   | 160821<br>(111735,226619)   | 177.2<br>(117.4,258.6) | -54.7<br>(-62.4,-47.2) |
| Greece         | 30026<br>(20529,43045)       | 253.1<br>(170.5,370.4) | 23783<br>(15568,34956)      | 212.9<br>(137.8,320.6) | -15.9<br>(-24.9,-4.3)  |
| Iceland        | 1090<br>(755,1541)           | 423.3<br>(292.9,595.7) | 1048<br>(685,1564)          | 293.8<br>(189,442.9)   | -30.6<br>(-38.2,-23.6) |
| Ireland        | 18201<br>(13036,24793)       | 490.6<br>(348.5,672.3) | 14421<br>(9722,21046)       | 286.3<br>(190.4,424)   | -41.6<br>(-48.3,-35.2) |
| Israel         | 17424<br>(12721,23551)       | 357<br>(261.3,481.8)   | 20568<br>(14044,29635)      | 216.4<br>(146.4,314.5) | -39.4<br>(-46.2,-32.4) |
| Italy          | 185488<br>(133570,253609)    | 260.1<br>(185,360.5)   | 105665<br>(70050,154388)    | 163.7<br>(103.9,245.6) | -37.1<br>(-45.8,-28.5) |
| Luxembourg     | 1998                         | 464.2                  | 1902                        | 286.7                  | -38.3                  |

|                           |                             |                        |                              |                        |                        |
|---------------------------|-----------------------------|------------------------|------------------------------|------------------------|------------------------|
|                           | (1454,2764)                 | (332.5,649.3)          | (1286,2714)                  | (190.6,415.2)          | (-46.6,-32.3)          |
| Malta                     | 1582<br>(1096,2209)         | 399.6<br>(276.8,564.2) | 1425<br>(941,2024)           | 287.1<br>(185.9,424.2) | -28.2<br>(-36.7,-19.4) |
| Netherlands               | 56489<br>(37082,83274)      | 347.8<br>(228.5,515.5) | 53135<br>(34850,77424)       | 278.6<br>(178.5,410.3) | -19.9<br>(-29,-4.3)    |
| Norway                    | 28197<br>(20830,37569)      | 539.6<br>(390,737.1)   | 15879<br>(10652,22942)       | 282.9<br>(185.7,420.2) | -47.6<br>(-53.7,-42.1) |
| Portugal                  | 58509<br>(41226,83138)      | 513.2<br>(357,726.8)   | 44273<br>(29445,64047)       | 364.3<br>(236.9,545.4) | -29<br>(-38.3,-18)     |
| Spain                     | 102579<br>(74288,141430)    | 233.7<br>(166.4,329.6) | 99636<br>(69160,140373)      | 189.8<br>(126,277.1)   | -18.8<br>(-28.8,-5)    |
| Sweden                    | 52973<br>(37183,74473)      | 500.6<br>(343.5,719.4) | 33946<br>(22213,49834)       | 309.3<br>(197.7,464.9) | -38.2<br>(-44.9,-31.2) |
| Switzerland               | 30074<br>(21131,41582)      | 384.3<br>(267.7,544.6) | 24986<br>(16467,36203)       | 268.6<br>(172,399)     | -30.1<br>(-39,-20.6)   |
| United Kingdom            | 389187<br>(274703,546054)   | 623.2<br>(433.4,880.5) | 275562<br>(188370,395026)    | 387<br>(255.5,566.1)   | -37.9<br>(-41.3,-34.4) |
| Monaco                    | 89<br>(61,127)              | 262.5<br>(175,387.4)   | 101<br>(68,144)              | 248<br>(163.5,366.1)   | -5.5<br>(-11.5,0.4)    |
| San Marino                | 62<br>(41,89)               | 249.6<br>(165.3,368.6) | 83<br>(56,122)               | 238.2<br>(156.3,355.5) | -4.6<br>(-11.3,2.7)    |
| Southern Latin America    | 162383<br>(117151,221208)   | 333.8<br>(242.3,454.4) | 190578<br>(130424,271189)    | 275.8<br>(188.2,399.4) | -17.4<br>(-26.2,-8.5)  |
| Argentina                 | 116515<br>(83460,159741)    | 352.5<br>(252.9,482.8) | 137570<br>(93582,198020)     | 297.6<br>(200.5,433.3) | -15.6<br>(-25,-5.7)    |
| Chile                     | 31782<br>(22709,44409)      | 266<br>(193.1,364.4)   | 42644<br>(29418,60267)       | 221.6<br>(150.8,319)   | -16.7<br>(-25,-8.2)    |
| Uruguay                   | 14080<br>(10980,17948)      | 412.6<br>(319.2,530.1) | 10355<br>(7630,14023)        | 274<br>(195.8,382.2)   | -33.6<br>(-41.2,-25.8) |
| High-income North America | 1120060<br>(783832,1576500) | 401.6<br>(276.7,570.3) | 1484598<br>(1021841,2057307) | 413<br>(282.5,584.4)   | 2.8<br>(-4.4,10.6)     |
| Canada                    | 68556<br>(49185,95588)      | 254.2<br>(178.8,361.3) | 69838<br>(47224,100710)      | 201.9<br>(133.1,301)   | -20.6<br>(-32.4,-12.6) |
| United States of          | 1051197                     | 417.5                  | 1414555                      | 436                    | 4.4                    |

|                                  |                           |                          |                           |                        |                        |
|----------------------------------|---------------------------|--------------------------|---------------------------|------------------------|------------------------|
| America                          | (733341,1478601)          | (287.9,591.9)            | (974634,1957880)          | (298.1,616.1)          | (-3.4,12.9)            |
| Greenland                        | 281<br>(208,380)          | 580.9<br>(435.3,772.3)   | 181<br>(131,248)          | 316.8<br>(225.1,441)   | -45.5<br>(-53.1,-36.6) |
| Caribbean                        | 217396<br>(162932,275565) | 608.8<br>(462.1,763.9)   | 192996<br>(146202,249879) | 422.8<br>(315.7,553.5) | -30.5<br>(-39.2,-21.2) |
| Antigua and Barbuda              | 173<br>(123,246)          | 283<br>(203.7,394.8)     | 216<br>(151,304)          | 270.8<br>(185,389.6)   | -4.3<br>(-13,3.7)      |
| Bahamas                          | 810<br>(593,1118)         | 328.2<br>(249.1,437.9)   | 1008<br>(724,1381)        | 287.7<br>(202.9,409.2) | -12.3<br>(-22.2,-2.9)  |
| Barbados                         | 968<br>(727,1281)         | 378.7<br>(282.9,505.7)   | 999<br>(731,1339)         | 345<br>(240.4,483)     | -8.9<br>(-19.1,2.1)    |
| Belize                           | 752<br>(551,1019)         | 361.5<br>(274.5,480.1)   | 1292<br>(924,1793)        | 313.7<br>(227.9,430)   | -13.2<br>(-23.2,-3.4)  |
| Cuba                             | 42090<br>(29965,57741)    | 392.6<br>(279.2,550.1)   | 33006<br>(23467,45686)    | 325.9<br>(221.6,471.4) | -17<br>(-25.3,-8.9)    |
| Dominica                         | 324<br>(248,428)          | 435.7<br>(336.8,566.4)   | 280<br>(214,362)          | 410.4<br>(308.8,540.3) | -5.8<br>(-18.2,5.9)    |
| Dominican Republic               | 36592<br>(27854,45465)    | 502<br>(397.2,607.9)     | 31385<br>(23320,40764)    | 297.9<br>(221.6,385.1) | -40.7<br>(-52.9,-28.5) |
| Grenada                          | 361<br>(262,492)          | 413.6<br>(308,545.8)     | 329<br>(229,469)          | 337.9<br>(229.6,486.8) | -18.3<br>(-27.9,-9.7)  |
| Guyana                           | 3492<br>(2669,4573)       | 503.3<br>(403.3,633.6)   | 2952<br>(2180,3919)       | 389.6<br>(289.5,517.5) | -22.6<br>(-33.8,-11.1) |
| Haiti                            | 87014<br>(57119,118813)   | 1286.3<br>(915.7,1690.4) | 88556<br>(63397,116228)   | 737.4<br>(524.8,978.6) | -42.7<br>(-54.2,-28)   |
| Jamaica                          | 9802<br>(7173,13222)      | 395.5<br>(296.8,521.2)   | 7966<br>(5657,10947)      | 300.8<br>(210.8,425)   | -23.9<br>(-33.6,-13.9) |
| Saint Lucia                      | 689<br>(523,903)          | 531.1<br>(418.8,673.7)   | 658<br>(498,860)          | 391.1<br>(288.6,523.4) | -26.4<br>(-35.2,-18.1) |
| Saint Vincent and the Grenadines | 400<br>(293,550)          | 366.5<br>(279.9,486)     | 340<br>(253,456)          | 311.6<br>(224.2,427.7) | -15<br>(-23.9,-6.5)    |
| Suriname                         | 1385<br>(1023,1872)       | 362.4<br>(275.9,479.1)   | 1636<br>(1190,2217)       | 291.7<br>(210,401.6)   | -19.5<br>(-28.6,-10.3) |
| Trinidad and                     | 4621                      | 405.7                    | 3668                      | 280.5                  | -30.9                  |

|                                  |                           |                        |                           |                        |                        |
|----------------------------------|---------------------------|------------------------|---------------------------|------------------------|------------------------|
| Tobago                           | (3771,5756)               | (339.1,493.6)          | (2714,4901)               | (201.6,389)            | (-43.4,-16.9)          |
| Bermuda                          | 168<br>(123,227)          | 302.2<br>(216.9,414.3) | 128<br>(89,181)           | 254.9<br>(166,381)     | -15.6<br>(-27,-5.4)    |
| Puerto Rico                      | 20029<br>(14446,27584)    | 557.5<br>(400.4,766.5) | 11604<br>(8135,16141)     | 382.7<br>(253.7,557.4) | -31.4<br>(-39.6,-23.4) |
| Saint Kitts and Nevis            | 157<br>(117,212)          | 380.9<br>(288.2,503.5) | 148<br>(102,208)          | 275.3<br>(186.6,396)   | -27.7<br>(-38.8,-17.5) |
| United States Virgin Islands     | 327<br>(246,443)          | 317.5<br>(242.4,426.3) | 286<br>(215,380)          | 277.1<br>(194.4,392.7) | -12.7<br>(-23.9,-2.7)  |
| Andean Latin America             | 183661<br>(131155,246268) | 396.4<br>(290.6,521.9) | 121611<br>(78553,185551)  | 192.3<br>(124.9,291.9) | -51.5<br>(-62.1,-39.5) |
| Bolivia (Plurinational State of) | 45257<br>(29287,64151)    | 556.3<br>(390.3,751.5) | 28563<br>(19505,40944)    | 227.7<br>(160.5,320.1) | -59.1<br>(-71,-44.4)   |
| Ecuador                          | 46458<br>(31764,62289)    | 381.8<br>(268.4,501.3) | 30722<br>(19606,47864)    | 174.7<br>(112,270.8)   | -54.3<br>(-65.8,-37.8) |
| Peru                             | 91945<br>(63881,128009)   | 353.2<br>(253.1,482.1) | 62325<br>(39485,96673)    | 189.8<br>(119.9,295.3) | -46.3<br>(-58.9,-33.4) |
| Central Latin America            | 529081<br>(405211,699805) | 337.7<br>(271.2,429.3) | 403923<br>(283108,574650) | 166.1<br>(116.3,237.5) | -50.8<br>(-58.7,-43.1) |
| Colombia                         | 90058<br>(65357,124850)   | 298<br>(227.6,395.4)   | 68843<br>(45646,101423)   | 153.1<br>(100.6,230.3) | -48.6<br>(-57.2,-40.7) |
| Costa Rica                       | 10400<br>(7080,14990)     | 346.1<br>(244.5,481.5) | 11233<br>(7626,16170)     | 248.3<br>(165.9,364.9) | -28.3<br>(-36.8,-19.9) |
| El Salvador                      | 35687<br>(25820,47340)    | 644.2<br>(485.4,825.4) | 16627<br>(11631,23503)    | 268.2<br>(188,376.9)   | -58.4<br>(-66.7,-48.7) |
| Guatemala                        | 61770<br>(45391,76484)    | 680.4<br>(522.2,817.7) | 31633<br>(22429,44389)    | 184.4<br>(136.2,249.6) | -72.9<br>(-79.2,-63.6) |
| Honduras                         | 35149<br>(25655,45356)    | 647.5<br>(492.3,806.5) | 27762<br>(19766,37524)    | 306.8<br>(221.3,402.6) | -52.6<br>(-63.1,-40.8) |
| Mexico                           | 210448<br>(160471,281254) | 285.4<br>(232.4,358.3) | 172041<br>(120406,249530) | 142.9<br>(100,206.6)   | -49.9<br>(-58.1,-41.4) |
| Nicaragua                        | 18974<br>(13891,25274)    | 434.6<br>(336.7,554.4) | 12925<br>(8932,18681)     | 206.2<br>(147.2,289)   | -52.6<br>(-60.8,-43.5) |



|                                          |                              |                        |                              |                        |                        |
|------------------------------------------|------------------------------|------------------------|------------------------------|------------------------|------------------------|
| Panama                                   | 8526<br>(6244,11493)         | 342.7<br>(258.6,453.3) | 9095<br>(6300,12865)         | 220.7<br>(152.5,312.8) | -35.6<br>(-45.7,-25.1) |
| Venezuela<br>(Bolivarian<br>Republic of) | 58069<br>(42469,80256)       | 292.9<br>(222,394.8)   | 53765<br>(37501,75761)       | 197.7<br>(136,282.6)   | -32.5<br>(-41.7,-23.8) |
| Tropical Latin<br>America                | 535740<br>(379824,768918)    | 340.1<br>(250.7,473.5) | 465996<br>(321847,685484)    | 227.3<br>(154.5,339.9) | -33.2<br>(-40.7,-26.5) |
| Brazil                                   | 524951<br>(372391,753508)    | 343.1<br>(253.1,477.4) | 448965<br>(310381,661636)    | 226.7<br>(154.2,339)   | -33.9<br>(-41.3,-27.2) |
| Paraguay                                 | 10789<br>(7416,15568)        | 242.4<br>(174.2,337.9) | 17030<br>(11265,25471)       | 250<br>(167,370.7)     | 3.1<br>(-7.8,13.7)     |
| North Africa and<br>Middle East          | 1524354<br>(1244481,1826907) | 618.1<br>(513.7,757.6) | 1677783<br>(1318052,2122631) | 324.2<br>(259.2,397.5) | -47.6<br>(-56,-39.1)   |
| Algeria                                  | 90377<br>(71285,113539)      | 560.2<br>(434.5,703.3) | 100735<br>(77473,131488)     | 275.6<br>(213.6,354.2) | -50.8<br>(-61.5,-37.3) |
| Bahrain                                  | 1558<br>(1259,1968)          | 497<br>(415.8,600.1)   | 2737<br>(2048,3699)          | 234.1<br>(179,310.4)   | -52.9<br>(-62.1,-43.4) |
| Egypt                                    | 344227<br>(273802,410983)    | 826<br>(662.2,993.5)   | 329754<br>(248869,426179)    | 427.6<br>(321.7,554.6) | -48.2<br>(-59.7,-35.3) |
| Iran (Islamic<br>Republic of)            | 200080<br>(159763,248232)    | 529.3<br>(431,652)     | 178733<br>(141139,230621)    | 232.3<br>(185,299.3)   | -56.1<br>(-64.9,-47.5) |
| Iraq                                     | 67949<br>(53875,85199)       | 543.2<br>(438.3,661.7) | 88873<br>(65706,119965)      | 255.9<br>(197.6,329.5) | -52.9<br>(-62.2,-42.5) |
| Jordan                                   | 9784<br>(7325,13300)         | 369.1<br>(293.4,460.6) | 22670<br>(15491,32674)       | 212.3<br>(151.1,293.6) | -42.5<br>(-53.7,-30.4) |
| Kuwait                                   | 4160<br>(3043,5748)          | 299.5<br>(230.1,388.5) | 7773<br>(5138,11225)         | 193.6<br>(128.8,279)   | -35.4<br>(-46.8,-23.6) |
| Lebanon                                  | 12523<br>(9551,15986)        | 475.4<br>(368.3,607.4) | 14283<br>(10620,18865)       | 277.3<br>(205.8,366)   | -41.7<br>(-55.5,-27.7) |
| Libya                                    | 13366<br>(10141,17361)       | 464.1<br>(353.3,589.5) | 17393<br>(13105,22497)       | 298.1<br>(226.9,386.8) | -35.8<br>(-49.8,-18.7) |
| Morocco                                  | 93676<br>(72706,120107)      | 540.9<br>(422.6,734.4) | 107938<br>(83304,135378)     | 336.9<br>(263.9,424.5) | -37.7<br>(-50.8,-23.9) |
| Palestine                                | 5707                         | 413.6                  | 9079                         | 227.2                  | -45.1                  |

|                      |                              |                          |                              |                        |                        |
|----------------------|------------------------------|--------------------------|------------------------------|------------------------|------------------------|
|                      | (4278,7514)                  | (317.1,524.5)            | (6532,12744)                 | (175.6,296.4)          | (-56.7,-31.3)          |
| Oman                 | 2763<br>(1813,4143)          | 160.3<br>(112.3,224)     | 7004<br>(4433,10629)         | 169.9<br>(110.3,252.5) | 6<br>(-10.9,24)        |
| Qatar                | 788<br>(576,1086)            | 235<br>(173.1,318.7)     | 3684<br>(2461,5454)          | 160.9<br>(109.3,230.9) | -31.5<br>(-47.4,-18)   |
| Saudi Arabia         | 39716<br>(30157,52261)       | 416.2<br>(308.3,573.1)   | 62888<br>(48237,81570)       | 228.3<br>(179.7,290.5) | -45.1<br>(-63.3,-22.5) |
| Syrian Arab Republic | 55133<br>(45092,67419)       | 627<br>(504,770.3)       | 49560<br>(39102,62444)       | 383.1<br>(305,480.9)   | -38.9<br>(-53.4,-20.1) |
| Tunisia              | 27407<br>(21872,35101)       | 426.3<br>(340.8,554.8)   | 29858<br>(22707,38757)       | 255.8<br>(192.7,333.9) | -40<br>(-53.9,-26)     |
| Turkey               | 214973<br>(165138,281292)    | 435.2<br>(338.4,553.3)   | 203951<br>(147952,277543)    | 253.5<br>(182.6,347.1) | -41.7<br>(-53.6,-31.2) |
| United Arab Emirates | 11271<br>(8436,15311)        | 1061.8<br>(784.4,1506)   | 46367<br>(32309,66889)       | 554.1<br>(397.5,778.3) | -47.8<br>(-59.7,-31.5) |
| Yemen                | 80746<br>(59122,105899)      | 1033.3<br>(719.3,1502.7) | 107152<br>(82283,139677)     | 531.2<br>(404.6,689.1) | -48.6<br>(-62.8,-28.2) |
| Afghanistan          | 105484<br>(76397,136749)     | 1246.6<br>(870,1671.3)   | 153145<br>(115193,198999)    | 729.3<br>(523.1,970.1) | -41.5<br>(-54.1,-26.6) |
| Sudan                | 141641<br>(101448,184017)    | 970.2<br>(657,1386)      | 132501<br>(95277,175172)     | 464.3<br>(335,638.6)   | -52.1<br>(-61.5,-38.3) |
| South Asia           | 6105862<br>(4284553,8208067) | 935.8<br>(632.7,1352)    | 6907586<br>(5205633,8695263) | 472<br>(350.5,601.2)   | -49.6<br>(-59.1,-39.4) |
| Bangladesh           | 530595<br>(398570,695694)    | 870.6<br>(632.1,1225.4)  | 336581<br>(253569,491856)    | 243.4<br>(181.9,362.6) | -72<br>(-80.2,-57.4)   |
| Bhutan               | 2700<br>(1678,4071)          | 839.5<br>(514.8,1398.1)  | 2004<br>(1450,2871)          | 341.8<br>(247.8,490.2) | -59.3<br>(-72.2,-38.7) |
| India                | 4946070<br>(3335325,6747399) | 977.2<br>(630.5,1427.6)  | 5838765<br>(4244934,7429628) | 498.5<br>(357.5,639.8) | -49<br>(-59.3,-38.2)   |
| Nepal                | 149258<br>(94001,199509)     | 1429.5<br>(877.4,2060.3) | 165507<br>(108363,230018)    | 741<br>(482.3,1040.9)  | -48.2<br>(-62.6,-31.2) |
| Pakistan             | 477239<br>(367948,660567)    | 700.4<br>(510,1039)      | 564729<br>(453492,709475)    | 414.8<br>(330.1,544.5) | -40.8<br>(-55.1,-22.1) |
| Central Sub-         | 365254                       | 920.1                    | 479544                       | 572.9                  | -37.7                  |

|                                  |                             |                           |                              |                         |                        |
|----------------------------------|-----------------------------|---------------------------|------------------------------|-------------------------|------------------------|
| Saharan Africa                   | (258843,452881)             | (640.2,1325.5)            | (341410,658749)              | (389.2,908)             | (-51.2,-21.3)          |
| Angola                           | 77300<br>(55991,104121)     | 1015.4<br>(742.6,1386.6)  | 91586<br>(67635,117202)      | 449.9<br>(338.2,600.9)  | -55.7<br>(-65.8,-42.7) |
| Central African Republic         | 23404<br>(16771,29743)      | 1277.2<br>(883.1,1818.1)  | 33206<br>(22905,46078)       | 985<br>(641.6,1640.9)   | -22.9<br>(-42.1,2.6)   |
| Congo                            | 15281<br>(11762,19737)      | 956<br>(702.9,1382.3)     | 17377<br>(12767,22648)       | 457.9<br>(334,597.6)    | -52.1<br>(-63.9,-36.2) |
| Democratic Republic of the Congo | 241368<br>(167618,315851)   | 873.5<br>(584,1305.2)     | 330098<br>(227077,486932)    | 605.3<br>(386.9,1036.2) | -30.7<br>(-48.3,-8.1)  |
| Equatorial Guinea                | 3294<br>(2296,4278)         | 1092.6<br>(739.4,1657.3)  | 3055<br>(2104,4292)          | 329.1<br>(225.9,516.3)  | -69.9<br>(-79.9,-54.9) |
| Gabon                            | 4608<br>(3551,5712)         | 627.6<br>(481.7,801.5)    | 4223<br>(3112,5476)          | 307.1<br>(230.4,392.6)  | -51.1<br>(-63.3,-35.3) |
| Eastern Sub-Saharan Africa       | 1228194<br>(961250,1495573) | 790.4<br>(622.1,947.5)    | 1450564<br>(1120595,1856696) | 450.9<br>(356.4,582.8)  | -43<br>(-50.8,-31.8)   |
| Burundi                          | 55095<br>(37754,74435)      | 1171.6<br>(825.7,1498.8)  | 53167<br>(38665,73604)       | 590.5<br>(423.1,865.4)  | -49.6<br>(-62.8,-30.5) |
| Comoros                          | 2722<br>(1546,3793)         | 734.2<br>(446.7,1001.4)   | 2603<br>(1951,3391)          | 418.3<br>(319.3,543)    | -43<br>(-57.1,-6.6)    |
| Djibouti                         | 2405<br>(1788,3196)         | 654.8<br>(480.4,845.7)    | 3729<br>(2643,4931)          | 380<br>(264.6,497.4)    | -42<br>(-54.2,-25.7)   |
| Eritrea                          | 23890<br>(16456,31724)      | 1046.5<br>(722.1,1349.6)  | 27914<br>(20649,36723)       | 566.1<br>(412.6,744.5)  | -45.9<br>(-58.3,-27.1) |
| Ethiopia                         | 315569<br>(222614,393205)   | 804.4<br>(595.6,999.1)    | 257986<br>(196330,339515)    | 314<br>(245.4,431.6)    | -61<br>(-69.1,-44.3)   |
| Kenya                            | 75338<br>(56426,99647)      | 456.6<br>(327.2,682.6)    | 129123<br>(94816,180149)     | 347.8<br>(251.6,523.6)  | -23.8<br>(-34.8,-11.4) |
| Madagascar                       | 148679<br>(120822,180648)   | 1317.2<br>(1084.3,1569.4) | 168468<br>(128492,217803)    | 783.8<br>(593.1,1003.6) | -40.5<br>(-51.9,-27)   |
| Malawi                           | 52596<br>(36843,70072)      | 644.9<br>(482.1,791.2)    | 57674<br>(43990,75180)       | 411<br>(317,522.1)      | -36.3<br>(-49.8,-16.3) |
| Mozambique                       | 75192<br>(52647,102538)     | 631.4<br>(464.2,788.3)    | 105284<br>(78682,135903)     | 469.5<br>(359.8,600.1)  | -25.6<br>(-41.4,-4.1)  |

|                             |                            |                           |                              |                        |                        |
|-----------------------------|----------------------------|---------------------------|------------------------------|------------------------|------------------------|
| Rwanda                      | 85844<br>(61935,111542)    | 1430.3<br>(1064.2,1804.8) | 67353<br>(48880,90616)       | 637.6<br>(471.8,860)   | -55.4<br>(-65.1,-39.8) |
| Somalia                     | 65284<br>(42058,88797)     | 1201.8<br>(757.4,1627.7)  | 112049<br>(77922,162913)     | 816<br>(540.3,1313.4)  | -32.1<br>(-48.4,-9.1)  |
| United Republic of Tanzania | 134353<br>(103621,172519)  | 604<br>(472.4,742.7)      | 227460<br>(167651,300831)    | 455.7<br>(347.1,587)   | -24.6<br>(-37.1,-10.1) |
| Uganda                      | 111661<br>(78565,147702)   | 784.9<br>(540.3,1064.4)   | 154512<br>(114191,206703)    | 482.3<br>(364.4,648.8) | -38.6<br>(-51.9,-19.6) |
| Zambia                      | 39897<br>(28492,52688)     | 643.4<br>(505,777)        | 47524<br>(36795,60497)       | 365.4<br>(285.1,457.5) | -43.2<br>(-56.1,-26.1) |
| South Sudan                 | 38767<br>(27015,52909)     | 770.6<br>(547,994.5)      | 34557<br>(25851,46294)       | 466<br>(343.4,659.7)   | -39.5<br>(-53.9,-20)   |
| Southern Sub-Saharan Africa | 293689<br>(250064,349249)  | 744.9<br>(640.2,871.8)    | 298971<br>(249019,366217)    | 446.5<br>(378.5,530.7) | -40.1<br>(-48.9,-31.6) |
| Botswana                    | 6945<br>(5061,9401)        | 908<br>(656.2,1252.6)     | 8548<br>(5978,11451)         | 479.5<br>(335.4,639.3) | -47.2<br>(-66.4,-23.8) |
| Lesotho                     | 11034<br>(7318,16937)      | 921.2<br>(597.6,1432.6)   | 12086<br>(8029,17091)        | 792.6<br>(527,1135.2)  | -14<br>(-44,29.2)      |
| Namibia                     | 8057<br>(5871,11015)       | 900.6<br>(659,1275)       | 7388<br>(5573,9542)          | 429.4<br>(328.2,551.8) | -52.3<br>(-65.6,-31.8) |
| South Africa                | 228742<br>(192890,275224)  | 756.2<br>(643.8,891.5)    | 209098<br>(169509,265380)    | 414.4<br>(342.3,518.4) | -45.2<br>(-51.7,-37.8) |
| Eswatini                    | 4842<br>(3713,6217)        | 1026.8<br>(783.6,1366.1)  | 5235<br>(4002,6617)          | 653.4<br>(501.3,834.4) | -36.4<br>(-53.6,-12.5) |
| Zimbabwe                    | 34070<br>(28550,39917)     | 640.1<br>(536.6,742.4)    | 56616<br>(40569,75382)       | 631.8<br>(442,844.1)   | -1.3<br>(-29.6,30.6)   |
| Western Sub-Saharan Africa  | 934430<br>(771817,1103902) | 704.2<br>(582.6,830.7)    | 1340150<br>(1080864,1670430) | 425.2<br>(354,508.8)   | -39.6<br>(-48.1,-29.7) |
| Benin                       | 26060<br>(20666,31822)     | 834.1<br>(656.6,1018.2)   | 38634<br>(29284,50621)       | 457.4<br>(352.5,589.6) | -45.2<br>(-56.7,-29.1) |
| Burkina Faso                | 39695<br>(30394,50383)     | 548.4<br>(436.7,662.1)    | 66573<br>(50923,86897)       | 389.5<br>(311.8,483.7) | -29<br>(-43.2,-11.9)   |
| Cameroon                    | 48518<br>(39383,58616)     | 760.4<br>(624.5,913.5)    | 76875<br>(57784,99462)       | 395.8<br>(301.8,514.7) | -47.9<br>(-61,-29.2)   |

|                       |                           |                           |                           |                        |                        |
|-----------------------|---------------------------|---------------------------|---------------------------|------------------------|------------------------|
| Cabo Verde            | 1497<br>(1055,1807)       | 559.4<br>(379.5,667)      | 1123<br>(876,1435)        | 224.2<br>(176,283.7)   | -59.9<br>(-70,-32.8)   |
| Chad                  | 34125<br>(26017,43350)    | 852.9<br>(645.6,1100.2)   | 56303<br>(43375,71511)    | 563<br>(436.2,720)     | -34<br>(-48.7,-12.5)   |
| Côte d'Ivoire         | 56170<br>(44146,69227)    | 792.8<br>(620.8,964.8)    | 80170<br>(60968,102255)   | 444.6<br>(353,555.6)   | -43.9<br>(-56.5,-28)   |
| Gambia                | 4220<br>(3154,5494)       | 729.6<br>(547.6,944.7)    | 6881<br>(5142,8786)       | 478.3<br>(365.2,607.3) | -34.4<br>(-52.1,-10)   |
| Ghana                 | 64240<br>(43138,79170)    | 669.9<br>(447.8,817.8)    | 92271<br>(65882,116018)   | 408.2<br>(292.6,512.9) | -39.1<br>(-53.9,-21.4) |
| Guinea                | 44062<br>(35175,53924)    | 945.4<br>(748.6,1157.9)   | 54345<br>(41602,69593)    | 622.8<br>(485.4,780.6) | -34.1<br>(-49,-15.8)   |
| Guinea-Bissau         | 8015<br>(6169,10008)      | 1290.2<br>(1011.2,1587.9) | 7901<br>(6146,9913)       | 675.6<br>(521.9,841.5) | -47.6<br>(-61.1,-30.3) |
| Liberia               | 10128<br>(7620,13053)     | 586.9<br>(470.4,708.1)    | 11003<br>(7890,14832)     | 321.8<br>(236.5,432.5) | -45.2<br>(-58.9,-27.1) |
| Mali                  | 52572<br>(41056,63362)    | 979.2<br>(688.4,1202.1)   | 77598<br>(57560,103189)   | 602.8<br>(429.4,813.3) | -38.4<br>(-52.7,-19.7) |
| Mauritania            | 11168<br>(8424,13855)     | 805.5<br>(607.4,987.2)    | 11761<br>(8592,15663)     | 376<br>(280.8,481.5)   | -53.3<br>(-63.5,-39.5) |
| Niger                 | 53954<br>(39946,68550)    | 996.4<br>(749,1252)       | 85130<br>(61579,113712)   | 572.4<br>(412.7,780.6) | -42.6<br>(-56.4,-24.4) |
| Nigeria               | 401313<br>(315839,498448) | 613.2<br>(484.6,760.1)    | 573192<br>(431716,739975) | 375.8<br>(297.4,460.3) | -38.7<br>(-50.1,-25.1) |
| Sao Tome and Principe | 962<br>(763,1159)         | 1130.8<br>(908.5,1362.8)  | 1000<br>(765,1259)        | 723.7<br>(550.2,907.4) | -36<br>(-51.5,-16.4)   |
| Senegal               | 37610<br>(28973,45884)    | 768<br>(589.6,940.1)      | 43109<br>(32903,55927)    | 412.4<br>(323.4,524.4) | -46.3<br>(-59.9,-28.9) |
| Sierra Leone          | 21831<br>(16131,27890)    | 796.9<br>(596.6,986.2)    | 28664<br>(21537,36841)    | 490.7<br>(378.4,626.4) | -38.4<br>(-53,-17.7)   |
| Togo                  | 18256<br>(14774,22474)    | 847.1<br>(680,1037.9)     | 27595<br>(20937,35929)    | 496.9<br>(380.4,632.5) | -41.3<br>(-54.2,-25.1) |

AD=atopic dermatitis. DALYs=disability-adjusted life-years. SDI=socio-demographic index.

95% UI=95% uncertainty interval.



**Table S4.** Years lived with disabilities of asthma in 1990 and 2019 for both sexes and percentage change in age-standardized rates by location.

| YLDs of Asthma                        | 1990                          |                        | 2019                           |                        | Percentage change in age-standardized rates between 1990 and 2019 |
|---------------------------------------|-------------------------------|------------------------|--------------------------------|------------------------|-------------------------------------------------------------------|
|                                       | Counts (95% UI)               | Rate (95% UI)          | Counts (95% UI)                | Rate (95% UI)          |                                                                   |
| Global                                | 8832453<br>(5776183,13071581) | 173.6<br>(114.2,254.4) | 10196265<br>(6654649,15061355) | 133<br>(86.9,197)      | -23.4<br>(-26.6,-20.2)                                            |
| High SDI                              | 2743830<br>(1801580,3993207)  | 323.1<br>(211.5,475.4) | 2645687<br>(1737984,3845124)   | 267.9<br>(175.4,393.6) | -17.1<br>(-20.3,-13.6)                                            |
| High-middle SDI                       | 1847585<br>(1213465,2736002)  | 164.2<br>(107.8,242.9) | 1662846<br>(1084433,2474001)   | 121.8<br>(77.6,185.5)  | -25.8<br>(-31.1,-21.3)                                            |
| Low SDI                               | 804727<br>(514369,1177033)    | 154.3<br>(101.8,224.7) | 1490133<br>(953066,2217091)    | 134.1<br>(87.3,196.7)  | -13.1<br>(-16.4,-9.7)                                             |
| Low-middle SDI                        | 1271486<br>(820137,1884191)   | 120.9<br>(79.3,177.3)  | 1753886<br>(1153117,2593813)   | 104.4<br>(68.4,154.2)  | -13.7<br>(-17.4,-10.5)                                            |
| Middle SDI                            | 2157954<br>(1367358,3251350)  | 127.6<br>(82.7,189.1)  | 2635538<br>(1708971,3945783)   | 115<br>(74.2,172.5)    | -9.9<br>(-13,-6.7)                                                |
| East Asia                             | 1071647<br>(669997,1654236)   | 92.6<br>(58.4,140.9)   | 1038961<br>(660804,1569073)    | 80.3<br>(49.6,125)     | -13.3<br>(-17.7,-9.3)                                             |
| China                                 | 1010438<br>(629908,1566852)   | 90.2<br>(56.6,137.7)   | 971498<br>(615815,1472285)     | 78.3<br>(48.4,122.2)   | -13.2<br>(-17.7,-9.4)                                             |
| Democratic People's Republic of Korea | 30020<br>(18972,44570)        | 150.5<br>(95.8,225.9)  | 38743<br>(25203,56801)         | 144.7<br>(93.5,213)    | -3.9<br>(-21.2,5.3)                                               |
| Taiwan (Province of China)            | 31189<br>(19862,46589)        | 164.7<br>(105.6,245)   | 28720<br>(18574,42055)         | 134.1<br>(83.9,204.4)  | -18.6<br>(-30.8,-2.2)                                             |
| Southeast Asia                        | 658642<br>(421895,974195)     | 145.4<br>(95.1,214.3)  | 877636<br>(575056,1288692)     | 134.5<br>(87.6,198.5)  | -7.5<br>(-10.6,-4.3)                                              |
| Cambodia                              | 8974<br>(5660,13619)          | 84.4<br>(55.1,122.3)   | 15194<br>(9754,22903)          | 93.9<br>(61,140.5)     | 11.3<br>(3.3,20.6)                                                |
| Indonesia                             | 263889<br>(169434,390748)     | 147.9<br>(96.2,217.8)  | 340823<br>(222113,496943)      | 134.4<br>(87.5,197.4)  | -9.1<br>(-12.8,-4.8)                                              |
| Lao People's Democratic Republic      | 4117<br>(2602,6133)           | 93.9<br>(60.1,136.6)   | 5812<br>(3685,8616)            | 83.8<br>(53.7,123.5)   | -10.8<br>(-17.4,-3.8)                                             |
| Malaysia                              | 20870                         | 129.9                  | 31240                          | 103.4                  | -20.4                                                             |

|                                  |                          |                        |                           |                        |                        |
|----------------------------------|--------------------------|------------------------|---------------------------|------------------------|------------------------|
|                                  | (13460,30947)            | (85.9,189.1)           | (20152,46769)             | (66.2,156.9)           | (-30,-9.2)             |
| Maldives                         | 356<br>(227,529)         | 141.6<br>(92.3,204.5)  | 437<br>(271,665)          | 95.8<br>(59.3,145.8)   | -32.3<br>(-43.5,-19.6) |
| Myanmar                          | 33088<br>(21451,48597)   | 84.4<br>(55.4,122.8)   | 41614<br>(27312,60510)    | 78.4<br>(51.8,113.8)   | -7.1<br>(-13.3,-0.8)   |
| Philippines                      | 156745<br>(97436,237527) | 230.2<br>(148.6,341.4) | 206681<br>(132733,308100) | 182.2<br>(117.5,269.9) | -20.8<br>(-22.9,-18.8) |
| Sri Lanka                        | 20918<br>(13765,30661)   | 138.9<br>(92.1,200.3)  | 30481<br>(20107,44301)    | 135.6<br>(88.8,199.1)  | -2.4<br>(-9.3,6.2)     |
| Thailand                         | 78695<br>(51017,116057)  | 151.8<br>(99.4,220.8)  | 89857<br>(58587,134199)   | 134.4<br>(85.6,201.5)  | -11.5<br>(-19.8,-2.4)  |
| Timor-Leste                      | 1043<br>(653,1544)       | 123.2<br>(80.1,180.2)  | 1570<br>(1020,2299)       | 113.6<br>(74.8,166)    | -7.8<br>(-14.7,-0.7)   |
| Viet Nam                         | 67354<br>(42754,100221)  | 101.5<br>(66,148.9)    | 111383<br>(72971,165959)  | 120.9<br>(78.9,180.7)  | 19.1<br>(12.1,27.2)    |
| Mauritius                        | 1648<br>(1065,2405)      | 163.3<br>(106.5,235)   | 1299<br>(855,1867)        | 108.5<br>(70,160.7)    | -33.5<br>(-39.9,-26.7) |
| Seychelles                       | 70<br>(45,105)           | 97.3<br>(63.4,143.8)   | 94<br>(61,139)            | 97.5<br>(62.5,145.6)   | 0.2<br>(-6.9,7.3)      |
| Oceania                          | 12319<br>(8003,18055)    | 210.3<br>(138.7,304.4) | 20740<br>(13545,30095)    | 165<br>(108.9,236.4)   | -21.6<br>(-24.9,-18)   |
| Fiji                             | 1233<br>(801,1825)       | 184.9<br>(122,269)     | 1134<br>(737,1640)        | 127<br>(82.5,183.2)    | -31.3<br>(-36.1,-26.3) |
| Kiribati                         | 179<br>(119,260)         | 259.9<br>(172.8,372)   | 206<br>(136,300)          | 184<br>(121.4,268.4)   | -29.2<br>(-32.5,-25.5) |
| Marshall Islands                 | 65<br>(42,95)            | 151.4<br>(100.7,216.9) | 66<br>(41,100)            | 117.3<br>(73.7,174.5)  | -22.5<br>(-32.6,-11.3) |
| Micronesia (Federated States of) | 148<br>(96,219)          | 151<br>(100.1,220.2)   | 124<br>(78,184)           | 122.9<br>(77,182.1)    | -18.6<br>(-29.2,-6.7)  |
| Papua New Guinea                 | 8533<br>(5574,12481)     | 232.8<br>(153.3,333.1) | 16178<br>(10559,23599)    | 177<br>(117.8,252.1)   | -24<br>(-27.6,-20.1)   |
| Samoa                            | 216<br>(138,322)         | 137.8<br>(89.1,202.3)  | 246<br>(154,372)          | 115.4<br>(73.1,170.3)  | -16.2<br>(-24.8,-4.3)  |
| Solomon Islands                  | 477                      | 152                    | 872                       | 135.3                  | -11                    |



|                          |                         |                        |                         |                       |                        |
|--------------------------|-------------------------|------------------------|-------------------------|-----------------------|------------------------|
|                          | (309,704)               | (100.4,215.2)          | (545,1327)              | (86.4,199.3)          | (-21.9,-0.3)           |
| Tonga                    | 167<br>(105,251)        | 175.6<br>(113.8,260.6) | 150<br>(92,228)         | 143.3<br>(90.3,215.6) | -18.4<br>(-25.9,-5.5)  |
| Vanuatu                  | 194<br>(123,286)        | 133.4<br>(88.1,191.6)  | 352<br>(207,573)        | 118.9<br>(69.2,190.6) | -10.9<br>(-33,9.2)     |
| American Samoa           | 66<br>(41,101)          | 136.2<br>(85.3,205.5)  | 73<br>(41,112)          | 130.6<br>(73.9,200.3) | -4.1<br>(-21.2,11.9)   |
| Cook Islands             | 30<br>(18,47)           | 156.4<br>(92.3,240.4)  | 25<br>(14,38)           | 140.6<br>(82.2,216)   | -10.1<br>(-17.6,4.2)   |
| Guam                     | 209<br>(126,327)        | 157.2<br>(93.9,242.6)  | 224<br>(131,348)        | 133.4<br>(79.7,207.6) | -15.1<br>(-20.8,-9.2)  |
| Nauru                    | 14<br>(9,21)            | 136.1<br>(88.8,197.7)  | 13<br>(8,21)            | 128.6<br>(78,198.2)   | -5.6<br>(-23.6,10.5)   |
| Niue                     | 3<br>(2,5)              | 139.4<br>(84.9,207.7)  | 2<br>(1,3)              | 137.1<br>(80.2,210.3) | -1.6<br>(-16.9,11.4)   |
| Northern Mariana Islands | 66<br>(41,102)          | 159.1<br>(98.5,243.8)  | 55<br>(31,84)           | 140.6<br>(83.9,216.3) | -11.6<br>(-20.6,4.2)   |
| Palau                    | 24<br>(15,35)           | 160<br>(103.4,235.7)   | 22<br>(14,33)           | 130<br>(83.8,192.8)   | -18.8<br>(-23.6,-12.7) |
| Tokelau                  | 2<br>(1,4)              | 132.4<br>(77.3,209.9)  | 2<br>(1,3)              | 134.4<br>(76.3,207.5) | 1.5<br>(-17.3,27.9)    |
| Tuvalu                   | 11<br>(7,17)            | 121.4<br>(79.5,176.6)  | 16<br>(9,24)            | 132.8<br>(74.4,207.1) | 9.4<br>(-22,29)        |
| Central Asia             | 67822<br>(43881,100754) | 104.6<br>(68.7,153.5)  | 81502<br>(52446,123038) | 89.2<br>(57.5,134.5)  | -14.7<br>(-21.3,-8.2)  |
| Armenia                  | 2566<br>(1604,3919)     | 76.4<br>(48.2,115.8)   | 2433<br>(1498,3661)     | 82.5<br>(51,126.8)    | 8<br>(-5.7,18.4)       |
| Azerbaijan               | 5825<br>(3732,8819)     | 82.8<br>(53.5,122.7)   | 7475<br>(4757,11253)    | 77.1<br>(49.7,116.8)  | -6.8<br>(-13.9,1.2)    |
| Georgia                  | 4540<br>(2941,6736)     | 82.2<br>(53.5,123.1)   | 2708<br>(1704,4057)     | 77.2<br>(48,118.4)    | -6<br>(-18.3,7.1)      |
| Kazakhstan               | 9835<br>(6272,14697)    | 62.2<br>(40.3,92)      | 11260<br>(7165,17229)   | 62.4<br>(39.7,95)     | 0.2<br>(-9.5,10.1)     |
| Kyrgyzstan               | 5522                    | 133.8                  | 6170                    | 95.1                  | -28.9                  |

|                        |                           |                        |                           |                        |                        |
|------------------------|---------------------------|------------------------|---------------------------|------------------------|------------------------|
|                        | (3539,8234)               | (87.2,197.1)           | (3890,9435)               | (60.7,144.4)           | (-36.9,-20)            |
| Mongolia               | 1871<br>(1190,2825)       | 100.7<br>(66.5,146.5)  | 2641<br>(1677,3973)       | 82.6<br>(53.3,122.9)   | -17.9<br>(-25.3,-10.4) |
| Tajikistan             | 4816<br>(3056,7301)       | 101.1<br>(66.3,147.1)  | 7700<br>(4856,11857)      | 88.3<br>(56.6,131.9)   | -12.7<br>(-20.5,-4.7)  |
| Turkmenistan           | 3981<br>(2578,5905)       | 114.8<br>(74.9,166.4)  | 4025<br>(2451,6182)       | 79.4<br>(48.5,122.6)   | -30.8<br>(-44.8,-21.3) |
| Uzbekistan             | 28866<br>(18503,43105)    | 165<br>(108.1,240.6)   | 37090<br>(23819,55987)    | 119<br>(76.6,177)      | -27.9<br>(-35.1,-20.2) |
| Central Europe         | 291214<br>(188909,430839) | 223.4<br>(144.2,331.8) | 194908<br>(124744,286828) | 164.6<br>(104.4,248.1) | -26.3<br>(-32.1,-20.8) |
| Albania                | 3117<br>(2002,4707)       | 101.3<br>(65.9,150)    | 3085<br>(1962,4589)       | 110.7<br>(69.7,170)    | 9.3<br>(-2.2,23.4)     |
| Bosnia and Herzegovina | 7884<br>(4983,11743)      | 178.4<br>(113.8,264.7) | 6153<br>(3916,9060)       | 173.8<br>(109.5,263.6) | -2.6<br>(-9,3.8)       |
| Bulgaria               | 15222<br>(9725,22379)     | 163.2<br>(104.3,243.3) | 10037<br>(6414,14924)     | 141.7<br>(88.8,211.7)  | -13.1<br>(-20.7,-4.5)  |
| Croatia                | 10876<br>(6959,16050)     | 204.6<br>(131.2,304.6) | 7165<br>(4640,10483)      | 156.8<br>(100,239.6)   | -23.4<br>(-30.9,-16.8) |
| Czechia                | 12765<br>(8094,18920)     | 123.2<br>(77.1,183.9)  | 12577<br>(7964,18480)     | 119.7<br>(74.9,182.7)  | -2.8<br>(-9.8,3.7)     |
| Hungary                | 17253<br>(11092,25494)    | 158.2<br>(101.5,236.6) | 12401<br>(7961,18303)     | 130<br>(81.9,196.5)    | -17.8<br>(-25.1,-10.5) |
| North Macedonia        | 5220<br>(3203,7806)       | 268.6<br>(163.1,401.5) | 4709<br>(3058,6978)       | 200.8<br>(129.8,301.1) | -25.2<br>(-36.5,-9.4)  |
| Montenegro             | 802<br>(501,1205)         | 128.1<br>(80.4,193.4)  | 887<br>(556,1330)         | 142<br>(88,217.2)      | 10.8<br>(2.4,20.2)     |
| Poland                 | 152142<br>(98403,223710)  | 374.7<br>(241.4,553.5) | 85211<br>(54871,125750)   | 211.9<br>(134.2,319.6) | -43.5<br>(-49.4,-37.5) |
| Romania                | 43067<br>(26862,64099)    | 176.1<br>(110.7,266.8) | 32565<br>(20672,48415)    | 164<br>(102.9,246.3)   | -6.9<br>(-16.8,4.8)    |
| Serbia                 | 11833<br>(7751,17308)     | 123.7<br>(80.8,182.1)  | 10011<br>(6509,14732)     | 111.4<br>(71.2,169.1)  | -9.9<br>(-15.9,-3.8)   |
| Slovakia               | 6230                      | 117                    | 6182                      | 114.4                  | -2.2                   |

|                          |                           |                        |                           |                        |                        |
|--------------------------|---------------------------|------------------------|---------------------------|------------------------|------------------------|
|                          | (3978,9370)               | (73.9,177)             | (3895,9051)               | (71.7,173.3)           | (-9.6,5.6)             |
| Slovenia                 | 4802<br>(3060,7018)       | 229<br>(146,338.2)     | 3925<br>(2514,5842)       | 179.5<br>(113.9,273.6) | -21.6<br>(-28.8,-14.7) |
| Eastern Europe           | 435997<br>(285731,633846) | 182.9<br>(119.3,268.5) | 208600<br>(133815,310804) | 107<br>(67.3,164.8)    | -41.5<br>(-47.2,-36)   |
| Belarus                  | 23184<br>(14707,33642)    | 208.8<br>(133,306.8)   | 12706<br>(8173,18816)     | 134.4<br>(85.4,203.4)  | -35.7<br>(-43.3,-27.1) |
| Estonia                  | 1761<br>(1143,2562)       | 109.2<br>(70.2,159.7)  | 1013<br>(660,1478)        | 81.9<br>(51.6,123.5)   | -25<br>(-34.9,-15)     |
| Latvia                   | 5465<br>(3532,7945)       | 190.8<br>(122.4,279.1) | 2341<br>(1526,3407)       | 125.3<br>(79.4,188.9)  | -34.3<br>(-43.9,-24)   |
| Lithuania                | 4887<br>(3142,7156)       | 127.6<br>(81.7,189.7)  | 2855<br>(1847,4192)       | 107<br>(68.6,162.3)    | -16.1<br>(-26.3,-4.3)  |
| Republic of Moldova      | 6321<br>(4093,9337)       | 140.9<br>(91.5,208.2)  | 3814<br>(2368,5709)       | 108.4<br>(67.1,167.4)  | -23.1<br>(-32.9,-15.1) |
| Russian Federation       | 296678<br>(193735,429846) | 185.3<br>(120.6,271.1) | 136373<br>(87496,202751)  | 99.3<br>(62.5,152.2)   | -46.4<br>(-52.2,-40.8) |
| Ukraine                  | 97703<br>(63231,143951)   | 184<br>(118.3,276.5)   | 49499<br>(31615,74294)    | 127.7<br>(79.1,197.9)  | -30.6<br>(-37.5,-23.8) |
| High-income Asia Pacific | 504225<br>(331665,735259) | 281.3<br>(182.9,413.1) | 278146<br>(180982,410133) | 147.5<br>(92.9,225.6)  | -47.6<br>(-53.4,-41.6) |
| Brunei Darussalam        | 434<br>(275,661)          | 214.9<br>(136.7,314.5) | 691<br>(437,1047)         | 187.7<br>(120.7,278.7) | -12.7<br>(-21.7,-6.6)  |
| Japan                    | 431226<br>(282136,627107) | 316.8<br>(206.4,464.1) | 195856<br>(126879,288578) | 152.4<br>(96.2,233.3)  | -51.9<br>(-56.8,-47)   |
| Republic of Korea        | 65188<br>(41366,96918)    | 172.5<br>(111.6,253.5) | 73798<br>(47864,109083)   | 141.3<br>(88.8,212.9)  | -18<br>(-30.3,-5.3)    |
| Singapore                | 7377<br>(4809,10830)      | 260.5<br>(171.8,379.2) | 7801<br>(4980,11725)      | 144.9<br>(90.6,221.4)  | -44.4<br>(-52.3,-33.1) |
| Australasia              | 94250<br>(62848,135017)   | 473.3<br>(315.5,679.3) | 89861<br>(57853,133500)   | 329.5<br>(209.2,497.4) | -30.4<br>(-40.8,-18.2) |
| Australia                | 75285<br>(50023,107117)   | 459.3<br>(305.7,657.3) | 79385<br>(51013,118054)   | 344.3<br>(217.4,519)   | -25<br>(-37.8,-8.9)    |
| New Zealand              | 18964                     | 547                    | 10475                     | 248.3                  | -54.6                  |

|                |                             |                        |                             |                        |                        |
|----------------|-----------------------------|------------------------|-----------------------------|------------------------|------------------------|
|                | (12234,27932)               | (352.4,817)            | (6741,15654)                | (158.2,378.3)          | (-58.8,-49.7)          |
| Western Europe | 1391090<br>(913134,2025432) | 322.2<br>(208.3,476.8) | 1039234<br>(673606,1534375) | 230.1<br>(147,347.2)   | -28.6<br>(-34.5,-22.7) |
| Andorra        | 149<br>(95,224)             | 267.1<br>(171.7,399.7) | 197<br>(126,294)            | 228.9<br>(145.7,342.9) | -14.3<br>(-20.9,-8.3)  |
| Austria        | 23667<br>(15229,34472)      | 270.8<br>(173.5,399.2) | 18851<br>(12186,28169)      | 204<br>(129,308.8)     | -24.7<br>(-33.2,-15.3) |
| Belgium        | 32128<br>(20919,47282)      | 280.7<br>(181.6,415.5) | 20882<br>(13599,30574)      | 179.9<br>(114,269.9)   | -35.9<br>(-44.6,-25.9) |
| Cyprus         | 2352<br>(1495,3517)         | 296.1<br>(188.7,447.5) | 3839<br>(2433,5741)         | 276<br>(175.3,417.3)   | -6.8<br>(-14.4,1.1)    |
| Denmark        | 13799<br>(9010,19786)       | 243.8<br>(158.9,355.6) | 10911<br>(7061,16395)       | 187.2<br>(118.9,282)   | -23.2<br>(-32.5,-12.6) |
| Finland        | 13984<br>(9062,20716)       | 260.3<br>(167.2,387.8) | 14569<br>(9458,21180)       | 237.1<br>(149.9,351.4) | -8.9<br>(-16.6,-1.6)   |
| France         | 240366<br>(157482,347446)   | 374.2<br>(243.7,546.5) | 177570<br>(115087,262940)   | 256.2<br>(163.9,384.2) | -31.5<br>(-39.4,-22.3) |
| Germany        | 253847<br>(166179,371686)   | 270.4<br>(177.5,398.5) | 138691<br>(89214,205292)    | 162.3<br>(102.5,243.9) | -40<br>(-48.5,-30.4)   |
| Greece         | 26546<br>(17081,39651)      | 227.9<br>(144.8,344.2) | 22692<br>(14491,33767)      | 207<br>(131.7,315)     | -9.2<br>(-18.8,4.3)    |
| Iceland        | 949<br>(614,1404)           | 371.5<br>(240.1,545.8) | 993<br>(626,1505)           | 282<br>(177.1,430.7)   | -24.1<br>(-32.1,-16.6) |
| Ireland        | 14646<br>(9381,21298)       | 397.6<br>(253.6,578.1) | 13331<br>(8593,19932)       | 268.5<br>(171.9,406.5) | -32.5<br>(-38.8,-25.3) |
| Israel         | 12635<br>(8124,18670)       | 257.4<br>(164.8,376.9) | 18159<br>(11636,27085)      | 194.1<br>(123.9,289.5) | -24.6<br>(-31.3,-17.9) |
| Italy          | 149335<br>(97750,217596)    | 215.1<br>(140.3,315.8) | 98061<br>(62248,146032)     | 157.4<br>(97.5,239.1)  | -26.8<br>(-36,-17.3)   |
| Luxembourg     | 1495<br>(961,2245)          | 361.7<br>(232.2,543.3) | 1710<br>(1098,2518)         | 264.5<br>(169.2,393.4) | -26.9<br>(-37.6,-20.2) |
| Malta          | 1373<br>(897,2013)          | 348.8<br>(228.1,513.2) | 1339<br>(859,1938)          | 275.4<br>(173.6,412)   | -21<br>(-29.5,-11.8)   |
| Netherlands    | 51019                       | 316.9                  | 51128                       | 270.8                  | -14.5                  |

|                              |                            |                        |                             |                        |                        |
|------------------------------|----------------------------|------------------------|-----------------------------|------------------------|------------------------|
|                              | (31671,77868)              | (197.3,484.1)          | (32936,75233)               | (170.4,403.4)          | (-23.9,3.8)            |
| Norway                       | 21579<br>(14248,30990)     | 434.4<br>(284.3,633.7) | 14377<br>(9217,21475)       | 265.6<br>(168.8,402.9) | -38.9<br>(-44.5,-33.4) |
| Portugal                     | 48351<br>(31245,72600)     | 430.9<br>(276.7,648.1) | 42157<br>(27225,61834)      | 354.4<br>(227,533.1)   | -17.8<br>(-27.4,-5.4)  |
| Spain                        | 78175<br>(50132,116512)    | 184.6<br>(117.3,279.4) | 85779<br>(55263,126558)     | 175<br>(111.6,261.2)   | -5.2<br>(-16.5,11.7)   |
| Sweden                       | 45450<br>(29826,66699)     | 442.3<br>(285,661.8)   | 31731<br>(20080,47823)      | 296.5<br>(185.3,452.7) | -33<br>(-39.5,-25.8)   |
| Switzerland                  | 24620<br>(15749,35919)     | 326.3<br>(208.5,484.3) | 23442<br>(14859,34648)      | 258.5<br>(162.3,389.1) | -20.8<br>(-30,-10)     |
| United Kingdom               | 333336<br>(219694,490741)  | 543.2<br>(352.5,801.2) | 247751<br>(159971,366996)   | 356.5<br>(224.9,536.7) | -34.4<br>(-37.5,-30.8) |
| Monaco                       | 78<br>(51,116)             | 241.7<br>(152.6,365.4) | 92<br>(59,136)              | 235.2<br>(150.2,352.2) | -2.7<br>(-8.5,4)       |
| San Marino                   | 56<br>(35,84)              | 230.6<br>(145.1,349.9) | 76<br>(48,116)              | 225.4<br>(143.6,345.6) | -2.3<br>(-8.4,4.6)     |
| Southern Latin<br>America    | 127338<br>(82883,187278)   | 259.7<br>(169.2,382.9) | 171365<br>(111147,252178)   | 251.1<br>(162.2,374.1) | -3.3<br>(-12,6.1)      |
| Argentina                    | 93242<br>(60491,136340)    | 280.9<br>(181.7,411.5) | 125400<br>(81026,186217)    | 273.5<br>(176,409)     | -2.7<br>(-12.4,8)      |
| Chile                        | 25504<br>(16628,38395)     | 206.2<br>(136.5,308.3) | 38037<br>(24690,55839)      | 201.4<br>(131,299.2)   | -2.3<br>(-11,7.3)      |
| Uruguay                      | 8586<br>(5729,12392)       | 260.6<br>(172.6,378.2) | 7920<br>(5214,11570)        | 221.1<br>(144.6,327)   | -15.2<br>(-23.1,-7.4)  |
| High-income North<br>America | 960383<br>(624772,1413476) | 349.5<br>(225.3,518.1) | 1360905<br>(900873,1942747) | 383.4<br>(252.9,555)   | 9.7<br>(1.1,19.4)      |
| Canada                       | 55618<br>(36240,83062)     | 211<br>(135.4,318.4)   | 64080<br>(41695,95040)      | 190.2<br>(121.7,289)   | -9.9<br>(-25.6,-1.3)   |
| United States of<br>America  | 904547<br>(587168,1330724) | 364.3<br>(235,538.6)   | 1296659<br>(857411,1849880) | 404.4<br>(265.6,584.8) | 11<br>(1.8,21.7)       |
| Greenland                    | 196<br>(124,291)           | 394.6<br>(250.6,586.8) | 145<br>(94,210)             | 261<br>(168.8,382.7)   | -33.9<br>(-41.5,-20.4) |
| Caribbean                    | 104200                     | 280.9                  | 107954                      | 240.1                  | -14.5                  |

|                                     |                        |                        |                        |                        |                       |
|-------------------------------------|------------------------|------------------------|------------------------|------------------------|-----------------------|
|                                     | (66212,154177)         | (180.1,416.1)          | (69368,160612)         | (153.8,359.7)          | (-18.5,-10.1)         |
| Antigua and Barbuda                 | 134<br>(84,207)        | 211.5<br>(133.2,324.2) | 169<br>(107,254)       | 222.9<br>(138.5,342.7) | 5.4<br>(-2,13.1)      |
| Bahamas                             | 596<br>(378,899)       | 221.2<br>(140.6,332.5) | 755<br>(481,1139)      | 225.2<br>(141.6,344.6) | 1.8<br>(-6.2,10.1)    |
| Barbados                            | 666<br>(430,993)       | 266.6<br>(171,398.5)   | 699<br>(450,1037)      | 272.5<br>(171.8,410.7) | 2.2<br>(-8.7,15.5)    |
| Belize                              | 539<br>(338,811)       | 238.5<br>(153.3,348.9) | 966<br>(601,1457)      | 224.8<br>(139.9,339.3) | -5.8<br>(-14.8,4.1)   |
| Cuba                                | 32009<br>(20136,47626) | 300.8<br>(189.6,453.1) | 25686<br>(16531,38173) | 277.3<br>(172.5,423.4) | -7.8<br>(-16,0.3)     |
| Dominica                            | 205<br>(131,301)       | 265.2<br>(171.5,389.5) | 170<br>(109,247)       | 270.6<br>(172.5,399.5) | 2<br>(-4.3,8.2)       |
| Dominican Republic                  | 13152<br>(8156,19821)  | 156.4<br>(97.9,232.5)  | 16693<br>(10511,25409) | 153.2<br>(96.8,233.5)  | -2.1<br>(-12.5,10.1)  |
| Grenada                             | 262<br>(161,396)       | 280.5<br>(174.7,419.5) | 267<br>(168,407)       | 280.9<br>(173.5,431.6) | 0.1<br>(-7.5,8.1)     |
| Guyana                              | 2171<br>(1386,3226)    | 262.2<br>(169.5,384)   | 1896<br>(1207,2835)    | 244.6<br>(155.8,366.4) | -6.7<br>(-13.4,0.4)   |
| Haiti                               | 24460<br>(15607,36596) | 323.5<br>(210.6,475)   | 37291<br>(23856,55201) | 278.2<br>(179,409)     | -14<br>(-19.6,-8.8)   |
| Jamaica                             | 6978<br>(4435,10482)   | 266.6<br>(170.1,398.1) | 5803<br>(3650,8740)    | 226.2<br>(140.3,343.5) | -15.1<br>(-24.4,-6.3) |
| Saint Lucia                         | 423<br>(262,638)       | 285.1<br>(180.5,422.9) | 414<br>(265,607)       | 267.3<br>(168.7,399.2) | -6.2<br>(-13.7,0.9)   |
| Saint Vincent and the<br>Grenadines | 285<br>(177,435)       | 232.8<br>(147.7,346.9) | 232<br>(148,349)       | 226.1<br>(142,341.2)   | -2.8<br>(-9.4,4.4)    |
| Suriname                            | 919<br>(583,1374)      | 219.8<br>(141.6,324.7) | 1165<br>(741,1761)     | 212.6<br>(134.2,322.8) | -3.2<br>(-11.6,4.6)   |
| Trinidad and Tobago                 | 2157<br>(1340,3238)    | 166<br>(104.7,248)     | 2159<br>(1331,3326)    | 184.1<br>(111.4,290.8) | 10.9<br>(-5.8,26.4)   |
| Bermuda                             | 117<br>(74,175)        | 219.8<br>(137.6,332)   | 107<br>(67,160)        | 233<br>(143.7,358.9)   | 6<br>(-2.4,14.4)      |
| Puerto Rico                         | 15336                  | 426.6                  | 9523                   | 340.2                  | -20.3                 |

|                                    |                           |                        |                           |                        |                        |
|------------------------------------|---------------------------|------------------------|---------------------------|------------------------|------------------------|
|                                    | (9774,22662)              | (271.5,633.5)          | (6143,14031)              | (211.7,513.1)          | (-28.3,-11.9)          |
| Saint Kitts and Nevis              | 106<br>(65,159)           | 241.2<br>(150.7,360.1) | 115<br>(72,174)           | 224.7<br>(138.5,344.7) | -6.8<br>(-15.3,0.9)    |
| United States Virgin Islands       | 214<br>(134,328)          | 199.1<br>(125.5,304)   | 186<br>(118,279)          | 213.2<br>(133.1,329.7) | 7<br>(0.3,14.6)        |
| Andean Latin America               | 105368<br>(64790,161466)  | 217.6<br>(136.1,329.9) | 107393<br>(64717,172678)  | 168.3<br>(101.5,270.2) | -22.7<br>(-33.9,-11)   |
| Bolivia (Plurinational State of)   | 18400<br>(11430,28555)    | 213.5<br>(134.1,326.2) | 22356<br>(13470,35093)    | 169.3<br>(102.5,263.6) | -20.7<br>(-30.8,-11.2) |
| Ecuador                            | 25669<br>(15626,39939)    | 202.3<br>(122.8,313.4) | 28208<br>(17123,45663)    | 158.8<br>(96.2,256.1)  | -21.5<br>(-33.8,-7.9)  |
| Peru                               | 61299<br>(37179,93903)    | 225.9<br>(139,341.4)   | 56828<br>(33978,91526)    | 173<br>(102.9,279)     | -23.4<br>(-36.2,-9.4)  |
| Central Latin America              | 312265<br>(192313,479694) | 173<br>(109.3,260.3)   | 314704<br>(197148,489943) | 129<br>(80.6,201.2)    | -25.5<br>(-31.8,-18.9) |
| Colombia                           | 63803<br>(39062,98260)    | 189.8<br>(118.8,286.8) | 61565<br>(38929,94020)    | 138.4<br>(86.7,215.7)  | -27.1<br>(-34.4,-19.2) |
| Costa Rica                         | 8781<br>(5448,13396)      | 275.2<br>(174.8,411.6) | 9742<br>(6205,14809)      | 219.2<br>(138,332.8)   | -20.4<br>(-29.6,-10.9) |
| El Salvador                        | 20847<br>(12573,31462)    | 344.4<br>(213.3,519.6) | 13307<br>(8394,20279)     | 213.5<br>(134.9,323.6) | -38<br>(-47.5,-24.8)   |
| Guatemala                          | 21103<br>(13119,31853)    | 203.1<br>(127.7,301)   | 21830<br>(13361,34278)    | 113.6<br>(69.9,176.4)  | -44.1<br>(-52.8,-34.4) |
| Honduras                           | 13534<br>(8372,20580)     | 215.8<br>(136.4,320.1) | 16134<br>(10144,24507)    | 150<br>(95.3,224.9)    | -30.5<br>(-38.8,-21.2) |
| Mexico                             | 127006<br>(78767,198656)  | 138.5<br>(88,208.6)    | 133346<br>(82627,211515)  | 110<br>(68,174.3)      | -20.6<br>(-27.7,-13.3) |
| Nicaragua                          | 11551<br>(6983,17844)     | 229<br>(143.4,347.2)   | 10170<br>(6225,15905)     | 150.4<br>(93.4,233.2)  | -34.3<br>(-43.5,-24.6) |
| Panama                             | 5673<br>(3585,8694)       | 214.4<br>(135,325)     | 7263<br>(4515,11067)      | 176.2<br>(109.3,270.2) | -17.8<br>(-28.6,-5.3)  |
| Venezuela (Bolivarian Republic of) | 39967<br>(24424,62079)    | 185.6<br>(115.1,281.9) | 41348<br>(25781,63237)    | 154.4<br>(95.6,238)    | -16.8<br>(-25.7,-7.9)  |
| Tropical Latin America             | 401914                    | 237                    | 391249                    | 194.7                  | -17.9                  |

|                              |                           |                        |                            |                        |                        |
|------------------------------|---------------------------|------------------------|----------------------------|------------------------|------------------------|
|                              | (248714,636577)           | (148.4,368.8)          | (246428,607975)            | (121.8,307.3)          | (-24.3,-12.1)          |
| Brazil                       | 393176<br>(243098,623017) | 238.7<br>(149.4,371.7) | 376339<br>(237100,585197)  | 194.1<br>(121.3,306.6) | -18.7<br>(-25.2,-12.9) |
| Paraguay                     | 8738<br>(5313,13592)      | 181.4<br>(114.7,275.5) | 14910<br>(9247,23501)      | 214.1<br>(132.2,334.3) | 18<br>(8.4,27.6)       |
| North Africa and Middle East | 530508<br>(335273,789985) | 160.9<br>(104.6,237.2) | 867522<br>(556087,1291504) | 148.6<br>(95.9,220.4)  | -7.7<br>(-12.3,-2.7)   |
| Algeria                      | 30833<br>(19064,46405)    | 123.8<br>(79.6,184.1)  | 51701<br>(32503,78900)     | 126.4<br>(79.7,191)    | 2.1<br>(-8.5,12.2)     |
| Bahrain                      | 774<br>(496,1151)         | 174<br>(113.8,254.3)   | 1817<br>(1141,2712)        | 142.5<br>(90.5,213.6)  | -18.1<br>(-26.3,-10.4) |
| Egypt                        | 79905<br>(49935,119584)   | 144.4<br>(92.9,211.1)  | 132046<br>(83689,197114)   | 136.3<br>(87,201.6)    | -5.6<br>(-13.6,1.9)    |
| Iran (Islamic Republic of)   | 90710<br>(57164,136079)   | 163.9<br>(106.8,240.2) | 103086<br>(66253,155079)   | 128.2<br>(82.4,190.9)  | -21.8<br>(-26.1,-17.1) |
| Iraq                         | 32184<br>(20602,47304)    | 193.7<br>(127.2,280.6) | 57370<br>(36350,87177)     | 135<br>(86.9,202.1)    | -30.3<br>(-37.6,-22.7) |
| Jordan                       | 6190<br>(3818,9673)       | 167.1<br>(106.6,248.7) | 18682<br>(11560,28594)     | 159.3<br>(100.1,239.8) | -4.6<br>(-13.1,6.9)    |
| Kuwait                       | 2942<br>(1830,4503)       | 175.5<br>(111.4,262.1) | 6862<br>(4242,10302)       | 164.4<br>(100.3,248.8) | -6.3<br>(-18.4,6.2)    |
| Lebanon                      | 5645<br>(3572,8466)       | 175.6<br>(113.4,260.9) | 8859<br>(5646,13277)       | 173.3<br>(110.6,258.9) | -1.3<br>(-10.3,8)      |
| Libya                        | 6640<br>(4195,10121)      | 165.8<br>(107.6,245)   | 9204<br>(5916,13702)       | 145.3<br>(93.6,215.5)  | -12.4<br>(-18.6,-6)    |
| Morocco                      | 26299<br>(16769,38926)    | 104.4<br>(68.3,154)    | 39966<br>(25598,60085)     | 113.9<br>(72.8,171.7)  | 9.1<br>(0.2,17.4)      |
| Palestine                    | 2858<br>(1771,4499)       | 141.9<br>(91.3,211.1)  | 6645<br>(4146,10257)       | 130.2<br>(83,198.1)    | -8.2<br>(-16.2,0.1)    |
| Oman                         | 2402<br>(1475,3755)       | 120.8<br>(76.1,184.3)  | 6804<br>(4242,10429)       | 159<br>(99.3,242.5)    | 31.6<br>(19.2,50.9)    |
| Qatar                        | 559<br>(349,858)          | 133.7<br>(84.4,199.8)  | 3348<br>(2116,5067)        | 135.6<br>(84.7,205.5)  | 1.4<br>(-7.7,10.2)     |
| Saudi Arabia                 | 13710                     | 82                     | 33758                      | 104.1                  | 26.9                   |



|                            |                            |                        |                             |                        |                        |
|----------------------------|----------------------------|------------------------|-----------------------------|------------------------|------------------------|
|                            | (8629,21021)               | (52.9,121.2)           | (21556,49243)               | (65.7,154.7)           | (15.4,41.9)            |
| Syrian Arab Republic       | 17095<br>(10896,25525)     | 130.7<br>(84.5,189.5)  | 18365<br>(11763,26947)      | 127.4<br>(82.1,187.4)  | -2.5<br>(-9.8,5.6)     |
| Tunisia                    | 11482<br>(7207,17518)      | 140.6<br>(90.1,208.6)  | 16076<br>(10406,23947)      | 142.3<br>(91,213.5)    | 1.2<br>(-6.5,9.8)      |
| Turkey                     | 118838<br>(75885,177842)   | 213.4<br>(137.7,315.1) | 157498<br>(102001,229712)   | 197.6<br>(128.7,290.8) | -7.4<br>(-15,0)        |
| United Arab Emirates       | 5004<br>(3213,7398)        | 313.9<br>(203,455.8)   | 24094<br>(15392,35700)      | 278.4<br>(182.4,405.7) | -11.3<br>(-17.2,-3.8)  |
| Yemen                      | 23589<br>(15029,35129)     | 185.4<br>(123,267.6)   | 46736<br>(29466,71275)      | 152.8<br>(99.6,225.4)  | -17.6<br>(-23.3,-11.1) |
| Afghanistan                | 19251<br>(12434,28037)     | 180.8<br>(118.4,260.5) | 59493<br>(37750,90817)      | 164.1<br>(107.4,235.8) | -9.2<br>(-14.6,-3.5)   |
| Sudan                      | 33241<br>(20636,49809)     | 168.2<br>(107.4,249)   | 64230<br>(39326,98576)      | 162.6<br>(103.8,245.9) | -3.3<br>(-11.3,5)      |
| South Asia                 | 924042<br>(599765,1365837) | 103.2<br>(67.6,149.7)  | 1520673<br>(993374,2247559) | 92.3<br>(59.8,135.2)   | -10.5<br>(-16.8,-7.2)  |
| Bangladesh                 | 59107<br>(39077,85217)     | 70.7<br>(46.8,100.7)   | 79826<br>(52818,114684)     | 53.3<br>(35.1,76.3)    | -24.6<br>(-30.2,-18.3) |
| Bhutan                     | 381<br>(248,552)           | 77.1<br>(51,110.4)     | 376<br>(245,543)            | 54.6<br>(36,78)        | -29.1<br>(-34.6,-23)   |
| India                      | 780076<br>(505469,1159057) | 111.5<br>(72.8,162.2)  | 1305164<br>(839031,1930247) | 101.2<br>(65.2,148.4)  | -9.2<br>(-16.1,-5.5)   |
| Nepal                      | 7433<br>(4910,10843)       | 47.6<br>(31.5,68.1)    | 11154<br>(7323,16465)       | 40.9<br>(27,59.8)      | -14.1<br>(-20.7,-7.5)  |
| Pakistan                   | 77045<br>(50175,113637)    | 81.4<br>(53.8,117.8)   | 124153<br>(80079,182790)    | 65<br>(42.3,94.2)      | -20.2<br>(-23.8,-16)   |
| Central Sub-Saharan Africa | 82936<br>(51921,123919)    | 141.6<br>(91.6,205.5)  | 162439<br>(102422,242480)   | 119.7<br>(77.7,173.1)  | -15.5<br>(-20.3,-10.3) |
| Angola                     | 18716<br>(12073,27933)     | 173.9<br>(113.1,252.7) | 39181<br>(24638,59403)      | 122.5<br>(79.3,178.3)  | -29.6<br>(-35.7,-23.4) |
| Central African Republic   | 4642<br>(2988,6868)        | 170<br>(111.3,245.2)   | 7199<br>(4616,10645)        | 134.7<br>(88.3,194.1)  | -20.8<br>(-25.5,-16.5) |
| Congo                      | 4234                       | 174.3                  | 7553                        | 144.6                  | -17                    |

|                                  |                           |                        |                            |                        |                        |
|----------------------------------|---------------------------|------------------------|----------------------------|------------------------|------------------------|
|                                  | (2731,6280)               | (113.8,249.9)          | (4826,11273)               | (93.2,211.8)           | (-23,-10.8)            |
| Democratic Republic of the Congo | 53335<br>(33058,79901)    | 128.9<br>(83.7,189)    | 104904<br>(66059,156279)   | 116.4<br>(75.3,167.7)  | -9.7<br>(-15.7,-2.4)   |
| Equatorial Guinea                | 682<br>(435,993)          | 153.9<br>(102.2,219.9) | 1725<br>(1080,2672)        | 118<br>(75.6,175.1)    | -23.4<br>(-30.8,-15.6) |
| Gabon                            | 1326<br>(835,1952)        | 133.8<br>(85.9,195.9)  | 1877<br>(1194,2885)        | 106.7<br>(68.6,159.3)  | -20.2<br>(-26.9,-12.6) |
| Eastern Sub-Saharan Africa       | 401713<br>(253524,597543) | 199.3<br>(130.3,289.6) | 704484<br>(442898,1056179) | 162.2<br>(104.8,237.7) | -18.6<br>(-22.2,-14.5) |
| Burundi                          | 13608<br>(8727,20089)     | 233.9<br>(152.6,335.3) | 20472<br>(12879,30849)     | 161.6<br>(104.7,233.2) | -30.9<br>(-35.7,-25.9) |
| Comoros                          | 927<br>(588,1367)         | 187.7<br>(120.9,270.5) | 1153<br>(738,1691)         | 159.4<br>(102.3,232.9) | -15.1<br>(-21.9,-7.9)  |
| Djibouti                         | 1050<br>(662,1575)        | 205.5<br>(133.6,297)   | 1933<br>(1230,2889)        | 162<br>(105.5,238.4)   | -21.2<br>(-26.7,-14.8) |
| Eritrea                          | 6355<br>(4079,9444)       | 207.6<br>(136,299.4)   | 11626<br>(7491,17238)      | 171.6<br>(112,247.4)   | -17.3<br>(-22.1,-12)   |
| Ethiopia                         | 78376<br>(49309,118802)   | 146.7<br>(95.2,214)    | 129044<br>(80071,201661)   | 109.4<br>(69.9,164.5)  | -25.4<br>(-30.9,-19.4) |
| Kenya                            | 30742<br>(19152,47324)    | 125.6<br>(81.3,184.2)  | 56310<br>(35209,86797)     | 107<br>(69,160)        | -14.7<br>(-17.1,-12.1) |
| Madagascar                       | 52171<br>(33897,75641)    | 389.4<br>(256.7,555.9) | 68751<br>(44539,99041)     | 248.9<br>(163.3,354.3) | -36.1<br>(-40.5,-31)   |
| Malawi                           | 16219<br>(9965,24541)     | 156.1<br>(100.1,228.5) | 28466<br>(17782,42993)     | 144.7<br>(92.3,210.3)  | -7.4<br>(-13.9,-0.7)   |
| Mozambique                       | 24452<br>(15399,36642)    | 166.8<br>(107.1,239.9) | 52559<br>(33482,78450)     | 167.8<br>(109.4,241.7) | 0.6<br>(-6,7.8)        |
| Rwanda                           | 34264<br>(22122,50624)    | 468.3<br>(309,680.1)   | 40041<br>(25194,58912)     | 319.8<br>(204.3,463)   | -31.7<br>(-37.4,-24.7) |
| Somalia                          | 16895<br>(10720,24810)    | 226.5<br>(150.6,325.5) | 36256<br>(23084,53933)     | 173.2<br>(112.9,249.5) | -23.5<br>(-28.2,-18.7) |
| United Republic of Tanzania      | 65190<br>(40122,97887)    | 239.6<br>(155.7,353.9) | 138961<br>(86204,209955)   | 231.6<br>(149.5,341.2) | -3.3<br>(-9.3,2.5)     |
| Uganda                           | 41686                     | 225.1                  | 84841                      | 193.6                  | -14                    |

|                             |                           |                        |                           |                       |                        |
|-----------------------------|---------------------------|------------------------|---------------------------|-----------------------|------------------------|
|                             | (26324,62785)             | (146.2,327.6)          | (52651,129461)            | (124.3,286.6)         | (-20.4,-7.2)           |
| Zambia                      | 7862<br>(4964,11957)      | 91.1<br>(59.3,134.4)   | 18145<br>(11240,28080)    | 90<br>(57.4,135)      | -1.2<br>(-10.1,9.4)    |
| South Sudan                 | 11622<br>(7298,17198)     | 187.2<br>(122.8,271)   | 15364<br>(9640,22781)     | 153.7<br>(99.6,223)   | -17.9<br>(-23.3,-11.7) |
| Southern Sub-Saharan Africa | 82174<br>(48250,128521)   | 160.7<br>(94.6,244.5)  | 104293<br>(62807,162924)  | 135.3<br>(82.1,208.5) | -15.8<br>(-22.7,-9.5)  |
| Botswana                    | 1129<br>(729,1666)        | 96.4<br>(62.7,139)     | 2216<br>(1406,3266)       | 99.6<br>(63.9,145.3)  | 3.4<br>(-7.7,20)       |
| Lesotho                     | 898<br>(570,1318)         | 51.9<br>(33.7,76)      | 1058<br>(685,1562)        | 53<br>(34.8,77.6)     | 2.1<br>(-5.1,9.4)      |
| Namibia                     | 1231<br>(801,1799)        | 96<br>(62.5,138.3)     | 1842<br>(1177,2733)       | 81<br>(52.2,118.4)    | -15.7<br>(-21.7,-9.5)  |
| South Africa                | 70686<br>(40294,110860)   | 193.6<br>(112,297.6)   | 86963<br>(49516,137841)   | 161.1<br>(92.7,254.8) | -16.8<br>(-24.9,-9.2)  |
| Eswatini                    | 1379<br>(891,2037)        | 199.4<br>(131.6,286.5) | 1820<br>(1191,2689)       | 178<br>(118.2,257.4)  | -10.7<br>(-15.3,-5.4)  |
| Zimbabwe                    | 6851<br>(4412,10357)      | 74.1<br>(48.7,107.6)   | 10394<br>(6614,15395)     | 76.7<br>(50.1,111.1)  | 3.5<br>(-2.1,10.3)     |
| Western Sub-Saharan Africa  | 272409<br>(174603,402464) | 145.8<br>(96.3,211)    | 553699<br>(350538,838869) | 120<br>(78.6,176.2)   | -17.7<br>(-20.7,-14.6) |
| Benin                       | 5880<br>(3734,8721)       | 125.5<br>(83.1,178.7)  | 13644<br>(8688,20715)     | 108.3<br>(71,157.9)   | -13.7<br>(-19.9,-7.9)  |
| Burkina Faso                | 10399<br>(6537,15802)     | 100.5<br>(65.4,145.9)  | 24289<br>(15121,37055)    | 100.9<br>(65.1,147.6) | 0.4<br>(-6.3,7.4)      |
| Cameroon                    | 10311<br>(6530,15448)     | 104.2<br>(68.3,150.7)  | 26923<br>(16852,41039)    | 90.8<br>(58.6,133.7)  | -12.9<br>(-20.4,-5.1)  |
| Cabo Verde                  | 422<br>(270,626)          | 119.2<br>(78,173.2)    | 534<br>(341,810)          | 96.2<br>(61.8,144.7)  | -19.3<br>(-27,-11.2)   |
| Chad                        | 5419<br>(3409,8058)       | 90.1<br>(58.6,132)     | 14721<br>(9144,22579)     | 84.3<br>(54.9,122.5)  | -6.5<br>(-13.3,0.9)    |
| Côte d'Ivoire               | 15462<br>(9920,23279)     | 132.9<br>(86.9,192.7)  | 31723<br>(20236,47308)    | 122.6<br>(80.1,179.8) | -7.8<br>(-13.7,-0.6)   |
| Gambia                      | 1157                      | 124.7                  | 2400                      | 108.4                 | -13.1                  |

|                       |                           |                        |                           |                        |                       |
|-----------------------|---------------------------|------------------------|---------------------------|------------------------|-----------------------|
|                       | (740,1717)                | (82.7,178.3)           | (1528,3603)               | (71.8,156.3)           | (-19,-7.1)            |
| Ghana                 | 12407<br>(7787,18497)     | 79.5<br>(51.8,114.3)   | 26379<br>(16762,40293)    | 82.9<br>(54.1,123.6)   | 4.3<br>(-2.9,11.7)    |
| Guinea                | 8825<br>(5547,13158)      | 143.6<br>(92,209)      | 16691<br>(10392,25317)    | 131.5<br>(83.3,194.5)  | -8.4<br>(-15.1,-1.4)  |
| Guinea-Bissau         | 1407<br>(909,2052)        | 151.6<br>(101.3,216.4) | 2219<br>(1425,3283)       | 121.4<br>(80.3,173.8)  | -19.9<br>(-25.3,-14)  |
| Liberia               | 2322<br>(1470,3439)       | 105<br>(68,150.7)      | 4539<br>(2856,6964)       | 90.6<br>(58.9,133.6)   | -13.7<br>(-22,-6.1)   |
| Mali                  | 7088<br>(4470,10720)      | 82.5<br>(53.8,119.9)   | 18963<br>(11894,29114)    | 83.5<br>(54.4,122.5)   | 1.3<br>(-5.5,8.3)     |
| Mauritania            | 4168<br>(2661,6199)       | 220.4<br>(145.5,319.1) | 7121<br>(4585,10736)      | 182.7<br>(119.3,270.2) | -17.1<br>(-24.2,-8.2) |
| Niger                 | 10791<br>(6912,15891)     | 132.5<br>(87.4,188.5)  | 25883<br>(16185,39503)    | 105.8<br>(69.6,154.7)  | -20.2<br>(-26,-14.2)  |
| Nigeria               | 158555<br>(101795,235786) | 182.6<br>(119.9,265.5) | 303708<br>(191539,467155) | 140.7<br>(90.9,206.5)  | -23<br>(-26,-19.7)    |
| Sao Tome and Principe | 237<br>(152,346)          | 194.1<br>(129.6,279.8) | 316<br>(204,462)          | 165.2<br>(109.6,236.2) | -14.9<br>(-20.8,-7.9) |
| Senegal               | 7327<br>(4573,10993)      | 97.6<br>(63.5,142.2)   | 13743<br>(8736,21191)     | 90.2<br>(58.5,133.8)   | -7.6<br>(-14.8,-0.7)  |
| Sierra Leone          | 4598<br>(2971,6698)       | 123.6<br>(82.2,176)    | 9022<br>(5790,13554)      | 107.7<br>(70.3,156.4)  | -12.8<br>(-19,-5.9)   |
| Togo                  | 5627<br>(3552,8489)       | 163.3<br>(105.2,236.9) | 10874<br>(6872,16255)     | 140.8<br>(90.8,204.9)  | -13.8<br>(-20.9,-6.2) |

SDI=socio-demographic index. 95% UI=95% uncertainty interval. YLDs=years lived with disability.

**Table S5.** Incidence rates of atopic dermatitis in 1990 and 2019 for both sexes and percentage change in age-standardized rates by location.

| Incidence of AD                       | 1990                            |                        | 2019                            |                        | Percentage change in age-standardized rates between 1990 and 2019 |
|---------------------------------------|---------------------------------|------------------------|---------------------------------|------------------------|-------------------------------------------------------------------|
|                                       | Counts (95% UI)                 | Rate (95% UI)          | Counts (95% UI)                 | Rate (95% UI)          |                                                                   |
| Global                                | 19187161<br>(18290469,20163445) | 342.3<br>(327,358.4)   | 24446018<br>(23339682,25569146) | 327.9<br>(312.8,343.7) | -4.2<br>(-4.8,-3.6)                                               |
| High SDI                              | 2972029<br>(2818698,3125298)    | 409.1<br>(385.7,432.8) | 3356190<br>(3198388,3509968)    | 394.5<br>(371.6,417.3) | -3.6<br>(-4.4,-2.8)                                               |
| High-middle SDI                       | 3970974<br>(3778337,4166089)    | 352.3<br>(335.5,370)   | 4731628<br>(4524214,4933564)    | 368.5<br>(351,386.7)   | 4.6<br>(3.7,5.6)                                                  |
| Low SDI                               | 1503649<br>(1413742,1605800)    | 205.7<br>(194.5,218.2) | 2705935<br>(2549903,2885926)    | 188.2<br>(178.1,199.2) | -8.5<br>(-9,-8)                                                   |
| Low-middle SDI                        | 4075278<br>(3843072,4337720)    | 299.5<br>(283.8,316.5) | 5101461<br>(4826898,5391419)    | 285.4<br>(270.3,301.3) | -4.7<br>(-5.1,-4.3)                                               |
| Middle SDI                            | 6654491<br>(6353883,6958746)    | 375.6<br>(359.6,391)   | 8079082<br>(7716749,8415846)    | 352.2<br>(336.4,367.5) | -6.2<br>(-7.2,-5.2)                                               |
| East Asia                             | 5008814<br>(4791100,5211250)    | 412.3<br>(395.5,427.8) | 6080367<br>(5807761,6330811)    | 413.8<br>(396.4,429.8) | 0.4<br>(-1.7,2.6)                                                 |
| China                                 | 4805479<br>(4598356,4998115)    | 409.4<br>(393.1,424.5) | 5837355<br>(5576377,6077542)    | 411.1<br>(394.1,427.2) | 0.4<br>(-1.7,2.8)                                                 |
| Democratic People's Republic of Korea | 99857<br>(93265,106506)         | 466.5<br>(436.2,496.4) | 118601<br>(110586,126671)       | 456.7<br>(427.2,485.8) | -2.1<br>(-2.3,-1.9)                                               |
| Taiwan (Province of China)            | 103478<br>(95736,110985)        | 520.8<br>(484.3,556.3) | 124411<br>(115945,134657)       | 529.4<br>(495.4,566.7) | 1.7<br>(-0.8,4.3)                                                 |
| Southeast Asia                        | 2508163<br>(2378893,2643072)    | 532.4<br>(505.4,558.1) | 3524067<br>(3336135,3697332)    | 530.3<br>(503.3,555.1) | -0.4<br>(-1.4,0.7)                                                |
| Cambodia                              | 55975<br>(52132,59935)          | 521.3<br>(488.4,556.8) | 84983<br>(79381,91030)          | 510.8<br>(478.8,544.4) | -2<br>(-2.2,-1.8)                                                 |
| Indonesia                             | 1052089<br>(1004552,1099115)    | 565.4<br>(541.8,589)   | 1437343<br>(1371678,1499105)    | 565.8<br>(540.5,589.7) | 0.1<br>(-2.4,2.5)                                                 |
| Lao People's Democratic Republic      | 21938<br>(20454,23499)          | 515<br>(482.6,549.2)   | 36529<br>(34100,39204)          | 508.3<br>(476.4,542.2) | -1.3<br>(-1.4,-1.2)                                               |
| Malaysia                              | 91240                           | 508.5                  | 155471                          | 502.6                  | -1.2                                                              |

|                                  |                           |                        |                           |                        |                     |
|----------------------------------|---------------------------|------------------------|---------------------------|------------------------|---------------------|
|                                  | (85163,97712)             | (476.7,542.6)          | (145241,166594)           | (471.3,536.3)          | (-1.3,-1.1)         |
| Maldives                         | 1182<br>(1101,1267)       | 505.7<br>(473.8,539.8) | 2276<br>(2117,2447)       | 475.4<br>(446,506.8)   | -6<br>(-6.7,-5.3)   |
| Myanmar                          | 213749<br>(199507,228977) | 511.1<br>(479,545.1)   | 279249<br>(260906,298835) | 514.7<br>(482.3,548.9) | 0.7<br>(0.6,0.8)    |
| Philippines                      | 333115<br>(317751,348439) | 515.4<br>(493.9,535.6) | 577429<br>(552006,601063) | 512.9<br>(491.6,533)   | -0.5<br>(-0.5,-0.4) |
| Sri Lanka                        | 80620<br>(74875,86134)    | 469.7<br>(438.5,500.7) | 100917<br>(93817,108104)  | 470.6<br>(437.9,502.9) | 0.2<br>(-2.3,2.9)   |
| Thailand                         | 288447<br>(268696,309920) | 510.7<br>(478.6,544.6) | 349286<br>(326139,375377) | 510<br>(477.9,543.8)   | -0.1<br>(-0.2,-0.1) |
| Timor-Leste                      | 4102<br>(3813,4387)       | 504.1<br>(472.5,537.7) | 6871<br>(6404,7374)       | 508.7<br>(476.8,542.7) | 0.9<br>(0.8,1)      |
| Viet Nam                         | 356466<br>(333297,382099) | 516.2<br>(483.6,550.3) | 482241<br>(449509,517448) | 508.2<br>(476.5,541.9) | -1.5<br>(-1.7,-1.4) |
| Mauritius                        | 5532<br>(5163,5943)       | 508.3<br>(476.3,542)   | 6355<br>(5938,6826)       | 508.5<br>(476.7,542.4) | 0.1<br>(0,0.1)      |
| Seychelles                       | 374<br>(350,401)          | 507.8<br>(475.8,541.7) | 499<br>(467,535)          | 497.1<br>(466.2,530)   | -2.1<br>(-2.3,-1.9) |
| Oceania                          | 32286<br>(29914,34610)    | 484.2<br>(450.8,516.8) | 65854<br>(61124,70491)    | 484.9<br>(451.6,517.5) | 0.2<br>(0.1,0.2)    |
| Fiji                             | 3735<br>(3465,4003)       | 486.8<br>(453.3,519.4) | 4401<br>(4093,4711)       | 485.7<br>(452.4,518.3) | -0.2<br>(-0.3,-0.2) |
| Kiribati                         | 377<br>(350,404)          | 490.9<br>(457.3,523.7) | 590<br>(548,631)          | 492.1<br>(458.4,525)   | 0.2<br>(0.2,0.3)    |
| Marshall Islands                 | 232<br>(214,250)          | 485.2<br>(452,517.8)   | 274<br>(254,294)          | 484.9<br>(451.4,517.5) | -0.1<br>(-0.2,0)    |
| Micronesia (Federated States of) | 525<br>(485,565)          | 485.6<br>(452.4,518.4) | 489<br>(455,524)          | 485.2<br>(451.9,517.9) | -0.1<br>(-0.2,0)    |
| Papua New Guinea                 | 20439<br>(18937,21916)    | 483.6<br>(450.3,516.2) | 49151<br>(45580,52645)    | 484.4<br>(451.1,517)   | 0.2<br>(0.1,0.2)    |
| Samoa                            | 798<br>(739,857)          | 481.2<br>(447.9,514)   | 1015<br>(945,1088)        | 484.4<br>(451.1,516.9) | 0.7<br>(0.5,0.8)    |
| Solomon Islands                  | 1733                      | 484.6                  | 3272                      | 487.3                  | 0.6                 |

|                          |                           |                        |                           |                        |                     |
|--------------------------|---------------------------|------------------------|---------------------------|------------------------|---------------------|
|                          | (1607,1867)               | (451.2,517.1)          | (3037,3508)               | (453.8,519.8)          | (0.5,0.7)           |
| Tonga                    | 483<br>(448,518)          | 489.5<br>(455.7,522.3) | 508<br>(472,542)          | 490.7<br>(457,523.5)   | 0.2<br>(0.1,0.3)    |
| Vanuatu                  | 773<br>(715,832)          | 486.4<br>(452.9,518.9) | 1462<br>(1358,1565)       | 488.7<br>(455.1,521.3) | 0.5<br>(0.4,0.5)    |
| American Samoa           | 244<br>(226,261)          | 485.8<br>(452.5,518.3) | 268<br>(249,287)          | 488<br>(454.6,520.7)   | 0.5<br>(0.3,0.6)    |
| Cook Islands             | 93<br>(87,100)            | 483.8<br>(450.5,516.4) | 88<br>(82,94)             | 494.6<br>(460.4,527.8) | 2.2<br>(2.1,2.4)    |
| Guam                     | 655<br>(607,701)          | 477.2<br>(444.6,509.6) | 823<br>(768,879)          | 482.1<br>(448.9,514.6) | 1<br>(0.9,1.2)      |
| Nauru                    | 52<br>(48,56)             | 484.9<br>(451.5,517.2) | 52<br>(48,56)             | 488<br>(454.4,520.7)   | 0.6<br>(0.4,0.8)    |
| Niue                     | 11<br>(11,12)             | 484.5<br>(451.1,517.1) | 8<br>(7,9)                | 485.7<br>(452.5,518.1) | 0.2<br>(0.1,0.4)    |
| Northern Mariana Islands | 218<br>(201,235)          | 482.9<br>(449.8,514.6) | 199<br>(185,215)          | 482.7<br>(449.6,514.8) | 0<br>(-0.4,0.4)     |
| Palau                    | 74<br>(69,79)             | 483.4<br>(450.2,516.1) | 82<br>(76,88)             | 470.6<br>(438.5,501.8) | -2.7<br>(-3,-2.4)   |
| Tokelau                  | 9<br>(8,9)                | 489.1<br>(455.2,522)   | 7<br>(7,7)                | 484.2<br>(450.9,516.5) | -1<br>(-1.3,-0.8)   |
| Tuvalu                   | 48<br>(45,51)             | 496.5<br>(462.3,529.9) | 56<br>(52,60)             | 480.9<br>(448,513.6)   | -3.1<br>(-3.4,-2.9) |
| Central Asia             | 518253<br>(452966,593851) | 614.6<br>(543.7,695.3) | 583002<br>(513906,662029) | 610.6<br>(540,691.4)   | -0.7<br>(-0.8,-0.5) |
| Armenia                  | 22421<br>(19657,25480)    | 612.9<br>(542.1,693.5) | 14960<br>(13353,16798)    | 607.1<br>(536.5,687.1) | -0.9<br>(-1.1,-0.8) |
| Azerbaijan               | 51261<br>(44771,58478)    | 613.4<br>(542.5,693.9) | 53286<br>(47396,59856)    | 605.1<br>(534.7,685.1) | -1.3<br>(-1.5,-1.2) |
| Georgia                  | 31314<br>(27792,35249)    | 614.8<br>(543.9,695.3) | 17994<br>(15983,20190)    | 602.5<br>(527.5,684.8) | -2<br>(-7.2,3)      |
| Kazakhstan               | 109568<br>(96164,124607)  | 615<br>(543.9,695.5)   | 113437<br>(100091,128506) | 613.1<br>(542.3,693.5) | -0.3<br>(-0.4,-0.3) |
| Kyrgyzstan               | 34348                     | 615.2                  | 44146                     | 612.3                  | -0.5                |

|                        |                           |                        |                           |                        |                      |
|------------------------|---------------------------|------------------------|---------------------------|------------------------|----------------------|
|                        | (29987,39413)             | (544,695.9)            | (38786,50380)             | (541.5,692.8)          | (-0.5,-0.4)          |
| Mongolia               | 17715<br>(15417,20381)    | 613.6<br>(542.6,694.6) | 22556<br>(19790,25698)    | 613.5<br>(542.5,694.1) | 0<br>(-0.1,0)        |
| Tajikistan             | 46994<br>(40746,54189)    | 613.7<br>(542.8,694.4) | 67192<br>(58784,76699)    | 610.4<br>(539.5,691.1) | -0.5<br>(-0.6,-0.5)  |
| Turkmenistan           | 30290<br>(26325,34836)    | 614.7<br>(543.7,695.5) | 32511<br>(28612,37012)    | 608.3<br>(537.3,688.6) | -1<br>(-1.2,-0.9)    |
| Uzbekistan             | 174342<br>(151337,200571) | 614.5<br>(543.5,695.3) | 216921<br>(190780,246369) | 610.8<br>(540,691.2)   | -0.6<br>(-0.7,-0.5)  |
| Central Europe         | 216330<br>(203707,229301) | 198<br>(185.2,211.7)   | 172334<br>(164449,180290) | 193.6<br>(182.2,206.1) | -2.2<br>(-3.3,-1)    |
| Albania                | 7313<br>(6733,7932)       | 202.6<br>(187.8,218.1) | 4510<br>(4239,4790)       | 203.1<br>(188.4,218.7) | 0.2<br>(0.2,0.3)     |
| Bosnia and Herzegovina | 8414<br>(7850,8994)       | 203.6<br>(188.9,219.2) | 5088<br>(4808,5374)       | 203.7<br>(189,219.3)   | 0.1<br>(0,0.1)       |
| Bulgaria               | 14882<br>(13992,15798)    | 203.9<br>(189.2,219.5) | 10679<br>(10110,11271)    | 203.3<br>(188.5,218.9) | -0.3<br>(-0.3,-0.3)  |
| Croatia                | 8337<br>(7821,8853)       | 203.8<br>(189,219.4)   | 6492<br>(6138,6847)       | 203.5<br>(188.8,219.1) | -0.1<br>(-0.2,-0.1)  |
| Czechia                | 17694<br>(16616,18786)    | 203.9<br>(189.2,219.5) | 17109<br>(16131,18109)    | 203.4<br>(188.6,218.9) | -0.3<br>(-0.3,-0.2)  |
| Hungary                | 21397<br>(19941,23032)    | 251.1<br>(229.6,276.3) | 18187<br>(17069,19401)    | 250.5<br>(229,275.7)   | -0.2<br>(-0.3,-0.2)  |
| North Macedonia        | 3895<br>(3628,4178)       | 203.6<br>(188.8,219.2) | 3428<br>(3226,3631)       | 202.9<br>(188.1,218.5) | -0.3<br>(-0.3,-0.3)  |
| Montenegro             | 1197<br>(1116,1284)       | 203.7<br>(188.9,219.2) | 1017<br>(958,1078)        | 203.2<br>(188.4,218.8) | -0.2<br>(-0.3,-0.2)  |
| Poland                 | 70764<br>(66965,74602)    | 206.1<br>(193.9,218.5) | 56802<br>(54785,58845)    | 188.7<br>(179.6,198.4) | -8.5<br>(-11.4,-5.6) |
| Romania                | 32524<br>(30420,34546)    | 151.6<br>(140.5,162)   | 23037<br>(21867,24190)    | 152.7<br>(141.6,163.3) | 0.8<br>(-3.6,5)      |
| Serbia                 | 16737<br>(15675,17824)    | 205.5<br>(190.6,221.2) | 14080<br>(13292,14908)    | 203<br>(188.3,218.6)   | -1.2<br>(-1.6,-0.8)  |
| Slovakia               | 9801                      | 204.2                  | 8659                      | 203.5                  | -0.3                 |



|                          |                           |                        |                           |                        |                     |
|--------------------------|---------------------------|------------------------|---------------------------|------------------------|---------------------|
|                          | (9157,10462)              | (189.5,219.7)          | (8162,9158)               | (188.8,219.1)          | (-0.4,-0.3)         |
| Slovenia                 | 3375<br>(3163,3585)       | 203.9<br>(189,219.4)   | 3246<br>(3066,3429)       | 203<br>(188.2,218.6)   | -0.4<br>(-0.5,-0.4) |
| Eastern Europe           | 529587<br>(497103,563367) | 260.9<br>(243.5,279.3) | 447762<br>(424028,471302) | 266<br>(248.6,283.9)   | 2<br>(1,2.9)        |
| Belarus                  | 19542<br>(18052,21103)    | 205.6<br>(188.8,223.3) | 15807<br>(14703,16901)    | 204.7<br>(187.9,222.4) | -0.4<br>(-0.5,-0.4) |
| Estonia                  | 4417<br>(4035,4819)       | 309.9<br>(279.7,341.9) | 3225<br>(2977,3467)       | 308.1<br>(278,340.1)   | -0.6<br>(-0.6,-0.5) |
| Latvia                   | 3435<br>(3161,3737)       | 145.3<br>(132.5,158.9) | 2161<br>(2023,2318)       | 144.6<br>(132.7,158.8) | -0.5<br>(-4.9,3.6)  |
| Lithuania                | 6803<br>(6290,7347)       | 205.6<br>(188.8,223.4) | 4419<br>(4136,4701)       | 204.7<br>(188,222.5)   | -0.4<br>(-0.5,-0.4) |
| Republic of Moldova      | 9099<br>(8355,9899)       | 205.9<br>(189.1,223.7) | 5684<br>(5329,6060)       | 204.6<br>(187.8,222.3) | -0.7<br>(-0.7,-0.6) |
| Russian Federation       | 385802<br>(361309,411043) | 283.3<br>(263.8,303.8) | 344268<br>(325625,362601) | 285.7<br>(267.1,304.8) | 0.8<br>(-0.4,2.1)   |
| Ukraine                  | 100488<br>(94500,106516)  | 219<br>(204.4,234.4)   | 72197<br>(68609,75746)    | 218.2<br>(203.6,233.5) | -0.4<br>(-0.4,-0.3) |
| High-income Asia Pacific | 762674<br>(719624,803368) | 547.9<br>(513.2,583)   | 746786<br>(710243,780211) | 545<br>(509.5,579.5)   | -0.5<br>(-3.6,2.8)  |
| Brunei Darussalam        | 1400<br>(1282,1528)       | 470.4<br>(434.3,508.2) | 1742<br>(1613,1879)       | 471.6<br>(435.4,509.5) | 0.3<br>(0.2,0.3)    |
| Japan                    | 566304<br>(537627,595411) | 584.5<br>(548.8,622.9) | 542674<br>(516730,565971) | 582.5<br>(545.5,618.6) | -0.3<br>(-4.4,3.3)  |
| Republic of Korea        | 184102<br>(169867,199186) | 473.2<br>(436.2,513.6) | 183563<br>(171269,196193) | 475.6<br>(437.1,517.9) | 0.5<br>(-4.2,5.8)   |
| Singapore                | 10867<br>(9938,11819)     | 443.4<br>(402.8,485.3) | 18806<br>(17364,20240)    | 440.8<br>(400.2,482.5) | -0.6<br>(-4.7,4.2)  |
| Australasia              | 65070<br>(60552,69978)    | 361.7<br>(334.4,391.8) | 87950<br>(82270,93692)    | 360.5<br>(333.6,389)   | -0.3<br>(-4.2,3.7)  |
| Australia                | 51558<br>(47536,55973)    | 346<br>(316.8,378)     | 71104<br>(66026,76547)    | 345.3<br>(316.7,375.9) | -0.2<br>(-4.9,4.8)  |
| New Zealand              | 13512                     | 436.7                  | 16847                     | 441.3                  | 1.1                 |

|                |                              |                        |                              |                        |                     |
|----------------|------------------------------|------------------------|------------------------------|------------------------|---------------------|
|                | (12749,14298)                | (410,464.7)            | (15972,17746)                | (415.1,469)            | (-2.8,4.6)          |
| Western Europe | 1499861<br>(1416522,1587693) | 477.2<br>(446.2,510.5) | 1649703<br>(1557015,1741430) | 476.7<br>(445.4,510.6) | -0.1<br>(-1.1,0.8)  |
| Andorra        | 182<br>(170,195)             | 444.1<br>(410.5,480.3) | 258<br>(243,273)             | 447.4<br>(413.5,483.8) | 0.7<br>(0.6,0.9)    |
| Austria        | 28356<br>(26545,30172)       | 448.9<br>(415.2,485.2) | 31336<br>(29461,33242)       | 447.5<br>(413.9,483.8) | -0.3<br>(-0.4,-0.3) |
| Belgium        | 36737<br>(34367,39091)       | 448.4<br>(414.7,484.7) | 41696<br>(39150,44308)       | 448.5<br>(414.8,484.9) | 0<br>(0,0.1)        |
| Cyprus         | 3095<br>(2808,3401)          | 433.7<br>(392.8,478.9) | 4533<br>(4176,4914)          | 433.4<br>(391.8,477.9) | -0.1<br>(-4.5,3.7)  |
| Denmark        | 21008<br>(19468,22788)       | 514.7<br>(468.2,568.4) | 23986<br>(22094,25927)       | 518.1<br>(469.8,570.8) | 0.7<br>(-3.1,4.7)   |
| Finland        | 18696<br>(17460,19925)       | 449<br>(415.2,485.3)   | 19679<br>(18496,20868)       | 448<br>(414.2,484.3)   | -0.2<br>(-0.3,-0.2) |
| France         | 272473<br>(252533,295269)    | 550.8<br>(505.1,603.1) | 298929<br>(278135,322482)    | 551<br>(505.3,603.3)   | 0<br>(0,0.1)        |
| Germany        | 280057<br>(262407,297299)    | 436.3<br>(405.3,468.7) | 291026<br>(272995,309179)    | 438.8<br>(404.5,475.1) | 0.6<br>(-4.5,2)     |
| Greece         | 31777<br>(29373,34521)       | 383.5<br>(346.6,423.2) | 30651<br>(28354,32938)       | 386.2<br>(348.7,428)   | 0.7<br>(-3.1,4.9)   |
| Iceland        | 1151<br>(1057,1257)          | 492.9<br>(450.4,542.5) | 1408<br>(1302,1527)          | 490.6<br>(446.1,541.6) | -0.5<br>(-4.7,3.6)  |
| Ireland        | 15011<br>(13936,16167)       | 448.4<br>(414.8,484.7) | 18831<br>(17589,20092)       | 449<br>(415.4,485.4)   | 0.1<br>(0.1,0.2)    |
| Israel         | 22975<br>(21220,24905)       | 449.4<br>(415.7,485.8) | 42504<br>(39328,45919)       | 448.5<br>(414.8,484.8) | -0.2<br>(-0.2,-0.2) |
| Italy          | 218741<br>(208284,229412)    | 508.6<br>(477.2,541.2) | 227737<br>(217176,237869)    | 507.7<br>(476.3,540.4) | -0.2<br>(-0.2,-0.2) |
| Luxembourg     | 1391<br>(1301,1482)          | 448.7<br>(415,484.9)   | 2175<br>(2040,2309)          | 447.6<br>(413.8,483.8) | -0.2<br>(-0.3,-0.2) |
| Malta          | 1489<br>(1384,1599)          | 448.8<br>(415.1,485)   | 1556<br>(1462,1651)          | 446.8<br>(413.1,483.1) | -0.4<br>(-0.5,-0.4) |
| Netherlands    | 55232                        | 448.6                  | 61156                        | 448.3                  | -0.1                |

|                           |                           |                        |                            |                        |                     |
|---------------------------|---------------------------|------------------------|----------------------------|------------------------|---------------------|
|                           | (51572,58879)             | (414.8,484.8)          | (57404,65015)              | (414.5,484.6)          | (-0.1,0)            |
| Norway                    | 17720<br>(16834,18673)    | 496.8<br>(467.4,528.2) | 21372<br>(20336,22449)     | 497<br>(466.3,529.4)   | 0<br>(-4.5,4.4)     |
| Portugal                  | 37029<br>(34605,39497)    | 449.9<br>(416.1,486.2) | 35835<br>(33789,37903)     | 449.8<br>(416.1,486.2) | 0<br>(0,0)          |
| Spain                     | 130818<br>(120316,141792) | 424.2<br>(387.1,467.1) | 148717<br>(137993,159751)  | 423.7<br>(386.6,466.7) | -0.1<br>(-0.1,-0.1) |
| Sweden                    | 33540<br>(31861,35191)    | 461.7<br>(434.2,489.6) | 39247<br>(37386,41088)     | 460.8<br>(433.5,488.8) | -0.2<br>(-0.2,-0.2) |
| Switzerland               | 24890<br>(23311,26489)    | 448.2<br>(414.5,484.5) | 31138<br>(29254,33028)     | 447.5<br>(413.8,483.8) | -0.2<br>(-0.2,-0.1) |
| United Kingdom            | 246061<br>(234216,258973) | 505<br>(475.7,537.1)   | 274246<br>(260489,287965)  | 497.7<br>(467.4,529.3) | -1.5<br>(-4.6,1.7)  |
| Monaco                    | 101<br>(95,107)           | 448<br>(414.4,484.3)   | 131<br>(124,140)           | 450.3<br>(416.3,486.9) | 0.5<br>(0.4,0.7)    |
| San Marino                | 87<br>(81,93)             | 449.5<br>(415.6,485.8) | 118<br>(110,125)           | 450.7<br>(417,487.2)   | 0.3<br>(0.2,0.4)    |
| Southern Latin America    | 204051<br>(188088,221484) | 402.5<br>(371.5,436.1) | 238534<br>(222335,256745)  | 401.8<br>(370.9,435.4) | -0.2<br>(-0.2,-0.1) |
| Argentina                 | 136814<br>(126113,148371) | 402.6<br>(371.6,436.2) | 164407<br>(153085,177167)  | 402<br>(371.1,435.6)   | -0.1<br>(-0.2,-0.1) |
| Chile                     | 55193<br>(50814,60062)    | 402.3<br>(371.5,435.9) | 62049<br>(57821,66609)     | 401.3<br>(370.4,434.8) | -0.3<br>(-0.3,-0.2) |
| Uruguay                   | 12036<br>(11165,12993)    | 402.2<br>(371.3,435.8) | 12066<br>(11261,12941)     | 401.8<br>(371.1,435.3) | -0.1<br>(-0.1,-0.1) |
| High-income North America | 816447<br>(778446,853366) | 312.9<br>(296.6,329.9) | 968991<br>(928999,1008590) | 295<br>(279.2,311.2)   | -5.7<br>(-6.6,-4.9) |
| Canada                    | 60890<br>(57865,63809)    | 244.8<br>(231.2,258.7) | 79873<br>(76540,83389)     | 244.9<br>(231.4,258.8) | 0<br>(0,0.1)        |
| United States of America  | 755408<br>(719413,790114) | 320<br>(302.9,337.4)   | 888977<br>(852130,925837)  | 300.4<br>(284,317.3)   | -6.1<br>(-7,-5.2)   |
| Greenland                 | 130<br>(122,137)          | 241.8<br>(228.3,255.6) | 125<br>(119,131)           | 243.6<br>(229.9,257.3) | 0.7<br>(0.6,0.9)    |
| Caribbean                 | 103916                    | 274.1                  | 119850                     | 274                    | -0.1                |

|                                  |                        |                        |                        |                        |                     |
|----------------------------------|------------------------|------------------------|------------------------|------------------------|---------------------|
|                                  | (95171,112845)         | (251.7,296)            | (110716,128900)        | (251.5,295.9)          | (-0.1,0)            |
| Antigua and Barbuda              | 173<br>(159,187)       | 274.5<br>(252,296.4)   | 195<br>(181,209)       | 274<br>(251.5,295.9)   | -0.2<br>(-0.2,-0.1) |
| Bahamas                          | 709<br>(651,768)       | 274.3<br>(251.8,296.2) | 845<br>(785,904)       | 274.4<br>(251.9,296.3) | 0<br>(0,0.1)        |
| Barbados                         | 631<br>(583,679)       | 274.3<br>(251.8,296.3) | 629<br>(589,671)       | 273.9<br>(251.4,295.8) | -0.1<br>(-0.2,-0.1) |
| Belize                           | 647<br>(588,708)       | 273.7<br>(251.4,295.6) | 1097<br>(1010,1186)    | 273.9<br>(251.5,295.8) | 0.1<br>(0,0.1)      |
| Cuba                             | 26961<br>(24843,29034) | 273.6<br>(251.2,295.4) | 24048<br>(22476,25628) | 273.5<br>(251.1,295.3) | 0<br>(-0.1,0)       |
| Dominica                         | 217<br>(199,235)       | 273.7<br>(251.2,295.6) | 157<br>(146,168)       | 273.6<br>(251.2,295.5) | -0.1<br>(-0.2,0)    |
| Dominican Republic               | 23465<br>(21324,25576) | 274.2<br>(251.8,296.1) | 29693<br>(27285,32070) | 273.8<br>(251.3,295.6) | -0.2<br>(-0.2,-0.1) |
| Grenada                          | 271<br>(247,295)       | 274.2<br>(251.7,296.2) | 241<br>(224,259)       | 273.5<br>(251.1,295.3) | -0.3<br>(-0.4,-0.2) |
| Guyana                           | 2427<br>(2212,2643)    | 274.3<br>(251.8,296.2) | 2040<br>(1879,2201)    | 274.1<br>(251.6,296)   | -0.1<br>(-0.1,-0.1) |
| Haiti                            | 22311<br>(20250,24413) | 274.7<br>(252.2,296.6) | 37543<br>(34271,40801) | 274.4<br>(251.9,296.3) | -0.1<br>(-0.2,-0.1) |
| Jamaica                          | 7149<br>(6535,7771)    | 274.2<br>(251.8,296.1) | 6551<br>(6066,7021)    | 273.9<br>(251.5,295.8) | -0.1<br>(-0.1,-0.1) |
| Saint Lucia                      | 442<br>(402,482)       | 274.5<br>(252,296.5)   | 376<br>(350,403)       | 273.9<br>(251.4,295.7) | -0.2<br>(-0.3,-0.2) |
| Saint Vincent and the Grenadines | 341<br>(311,371)       | 274.1<br>(251.6,296)   | 267<br>(248,287)       | 273.6<br>(251.3,295.5) | -0.2<br>(-0.2,-0.1) |
| Suriname                         | 1142<br>(1045,1240)    | 274.2<br>(251.7,296.1) | 1451<br>(1341,1561)    | 273.9<br>(251.4,295.8) | -0.1<br>(-0.2,0)    |
| Trinidad and Tobago              | 3548<br>(3240,3852)    | 274<br>(251.6,295.9)   | 3123<br>(2908,3342)    | 273.7<br>(251.3,295.6) | -0.1<br>(-0.1,-0.1) |
| Bermuda                          | 139<br>(129,149)       | 274.3<br>(251.8,296.2) | 129<br>(121,137)       | 274.1<br>(251.7,296)   | -0.1<br>(-0.1,0)    |
| Puerto Rico                      | 9463                   | 274.1                  | 7033                   | 273.9                  | -0.1                |

|                                    |                           |                        |                           |                        |                     |
|------------------------------------|---------------------------|------------------------|---------------------------|------------------------|---------------------|
|                                    | (8739,10200)              | (251.6,296)            | (6593,7486)               | (251.4,295.8)          | (-0.1,0)            |
| Saint Kitts and Nevis              | 123<br>(112,133)          | 274.2<br>(251.7,296.1) | 133<br>(124,143)          | 273.9<br>(251.5,295.8) | -0.1<br>(-0.1,-0.1) |
| United States Virgin Islands       | 295<br>(270,319)          | 274.4<br>(251.9,296.3) | 238<br>(221,254)          | 274.2<br>(251.7,296.1) | -0.1<br>(-0.1,0)    |
| Andean Latin America               | 117267<br>(109117,125225) | 258.6<br>(242.9,274.3) | 164628<br>(155251,174694) | 259.4<br>(244.6,275)   | 0.3<br>(-0.7,1.3)   |
| Bolivia (Plurinational State of)   | 21407<br>(19918,22998)    | 263.6<br>(247.7,280.4) | 34834<br>(32634,37199)    | 263.3<br>(247.4,280.1) | -0.1<br>(-0.1,-0.1) |
| Ecuador                            | 32844<br>(30486,35345)    | 278.9<br>(260.9,297.9) | 48695<br>(45541,51955)    | 279<br>(261.3,297.4)   | 0<br>(-3.3,3.5)     |
| Peru                               | 63015<br>(58522,67776)    | 247.7<br>(232.5,263.5) | 81098<br>(76096,86242)    | 247.3<br>(232,263.2)   | -0.1<br>(-0.2,-0.1) |
| Central Latin America              | 426931<br>(398511,458889) | 217.2<br>(204.2,231.7) | 512097<br>(482639,544328) | 217.1<br>(204,231.5)   | -0.1<br>(-0.2,0.1)  |
| Colombia                           | 80351<br>(73843,87322)    | 215.7<br>(199.7,232.7) | 92590<br>(86178,99095)    | 215.6<br>(199.7,232.6) | 0<br>(-0.1,0)       |
| Costa Rica                         | 7673<br>(7054,8349)       | 215.5<br>(199.6,232.5) | 8887<br>(8283,9504)       | 215.8<br>(199.8,232.7) | 0.1<br>(0.1,0.2)    |
| El Salvador                        | 13727<br>(12582,14936)    | 215.8<br>(199.9,232.8) | 13148<br>(12197,14148)    | 216<br>(200.1,232.9)   | 0.1<br>(0,0.1)      |
| Guatemala                          | 23419<br>(21311,25620)    | 215.7<br>(199.8,232.7) | 41149<br>(37973,44549)    | 215.9<br>(200,232.8)   | 0.1<br>(0,0.1)      |
| Honduras                           | 13812<br>(12593,15124)    | 215.7<br>(199.7,232.7) | 22992<br>(21210,24894)    | 215.8<br>(199.8,232.7) | 0.1<br>(0,0.1)      |
| Mexico                             | 223237<br>(209132,237501) | 218.7<br>(206.2,230.5) | 254711<br>(240728,267820) | 218.5<br>(206.1,230.4) | -0.1<br>(-0.1,0)    |
| Nicaragua                          | 11439<br>(10443,12530)    | 215.9<br>(199.9,232.9) | 14394<br>(13307,15555)    | 215.7<br>(199.8,232.7) | -0.1<br>(-0.1,-0.1) |
| Panama                             | 5731<br>(5274,6216)       | 215.4<br>(199.5,232.4) | 8755<br>(8116,9426)       | 215.4<br>(199.5,232.4) | 0<br>(0,0)          |
| Venezuela (Bolivarian Republic of) | 47542<br>(43655,51703)    | 215.7<br>(199.7,232.6) | 55470<br>(51593,59439)    | 215.6<br>(199.7,232.6) | 0<br>(0,0)          |
| Tropical Latin America             | 532791                    | 320.6                  | 624895                    | 320                    | -0.2                |

|                              |                           |                        |                              |                        |                     |
|------------------------------|---------------------------|------------------------|------------------------------|------------------------|---------------------|
|                              | (502570,566391)           | (303.4,339)            | (595717,655131)              | (303.5,337.5)          | (-3.3,2.8)          |
| Brazil                       | 516640<br>(487448,548724) | 320.6<br>(303.6,339.2) | 603400<br>(575850,632485)    | 320.1<br>(303.6,337.4) | -0.2<br>(-3.5,2.9)  |
| Paraguay                     | 16152<br>(14724,17647)    | 319.6<br>(295,344.7)   | 21495<br>(19860,23179)       | 319.3<br>(294.7,344.3) | -0.1<br>(-0.1,-0.1) |
| North Africa and Middle East | 848965<br>(790033,911474) | 202.3<br>(189.1,216.5) | 1215388<br>(1135711,1299728) | 195.1<br>(182.6,208.7) | -3.6<br>(-4.5,-2.6) |
| Algeria                      | 59366<br>(55003,64012)    | 193.7<br>(180.5,207.6) | 82659<br>(76892,88643)       | 193.5<br>(180.4,207.5) | -0.1<br>(-0.1,0)    |
| Bahrain                      | 1097<br>(1016,1179)       | 190.9<br>(177.9,204.5) | 2277<br>(2108,2453)          | 190.7<br>(177.7,204.4) | -0.1<br>(-0.2,0)    |
| Egypt                        | 93660<br>(85503,102135)   | 140.1<br>(129,151.5)   | 144105<br>(132649,156308)    | 135.7<br>(125.3,146.3) | -3.2<br>(-7.9,0.8)  |
| Iran (Islamic Republic of)   | 144877<br>(135875,154077) | 197.2<br>(186.6,208.2) | 159855<br>(151455,168668)    | 198.1<br>(187.7,209)   | 0.5<br>(-2.7,3.9)   |
| Iraq                         | 43866<br>(39969,48054)    | 193.5<br>(177.7,209.8) | 88559<br>(81120,96443)       | 193.4<br>(177.6,209.7) | -0.1<br>(-0.1,0)    |
| Jordan                       | 9184<br>(8508,9927)       | 192.8<br>(179.7,206.8) | 23720<br>(22083,25507)       | 192.4<br>(179.3,206.2) | -0.2<br>(-0.3,-0.2) |
| Kuwait                       | 3800<br>(3528,4085)       | 190.9<br>(177.8,204.5) | 7827<br>(7233,8416)          | 192.5<br>(179.4,206.3) | 0.9<br>(0.6,1.2)    |
| Lebanon                      | 7377<br>(6841,7943)       | 193.7<br>(180.5,207.8) | 9948<br>(9249,10671)         | 193.8<br>(180.6,207.8) | 0<br>(0,0.1)        |
| Libya                        | 10261<br>(9508,11095)     | 192.8<br>(179.7,206.6) | 11877<br>(11022,12753)       | 193.2<br>(180.1,207)   | 0.2<br>(0.1,0.4)    |
| Morocco                      | 57429<br>(53317,61891)    | 194.1<br>(180.9,208.1) | 67474<br>(62802,72470)       | 193.7<br>(180.5,207.7) | -0.2<br>(-0.2,-0.2) |
| Palestine                    | 5370<br>(4956,5823)       | 194<br>(180.8,207.9)   | 10963<br>(10175,11811)       | 193.5<br>(180.4,207.5) | -0.2<br>(-0.3,-0.2) |
| Oman                         | 4633<br>(4287,5000)       | 190.1<br>(177.3,203.6) | 8698<br>(8013,9382)          | 189.3<br>(176.6,202.9) | -0.4<br>(-0.6,-0.3) |
| Qatar                        | 908<br>(838,979)          | 187.7<br>(174.9,201.2) | 4683<br>(4297,5082)          | 185.9<br>(172.9,199.3) | -1<br>(-1.2,-0.7)   |
| Saudi Arabia                 | 38011                     | 191                    | 63185                        | 190.8                  | -0.1                |

|                            |                              |                        |                              |                        |                     |
|----------------------------|------------------------------|------------------------|------------------------------|------------------------|---------------------|
|                            | (35250,40994)                | (178.1,204.7)          | (58368,68010)                | (177.8,204.4)          | (-0.2,-0.1)         |
| Syrian Arab Republic       | 32246<br>(29806,34871)       | 193.4<br>(180.2,207.3) | 26772<br>(24870,28848)       | 194.7<br>(181.4,208.8) | 0.7<br>(0.5,1)      |
| Tunisia                    | 18845<br>(17486,20315)       | 193.6<br>(180.5,207.6) | 20492<br>(19082,21970)       | 193.7<br>(180.5,207.7) | 0.1<br>(0,0.1)      |
| Turkey                     | 200110<br>(184725,217088)    | 296.6<br>(274.1,321.3) | 207399<br>(192007,224118)    | 297<br>(274.9,320.6)   | 0.1<br>(-3.3,3.8)   |
| United Arab Emirates       | 4006<br>(3698,4320)          | 188.2<br>(175.5,201.9) | 13726<br>(12484,15040)       | 188.1<br>(175.3,202.1) | -0.1<br>(-0.3,0.1)  |
| Yemen                      | 36342<br>(33504,39513)       | 193.7<br>(180.5,207.7) | 72702<br>(67418,78377)       | 193.7<br>(180.5,207.6) | 0<br>(-0.1,0)       |
| Afghanistan                | 27448<br>(25426,29667)       | 194.6<br>(181.2,208.7) | 95041<br>(87931,102778)      | 193.4<br>(180.2,207.2) | -0.6<br>(-0.8,-0.5) |
| Sudan                      | 49558<br>(45899,53520)       | 193.6<br>(180.4,207.6) | 92193<br>(85488,99360)       | 193.6<br>(180.3,207.6) | 0<br>(-0.1,0)       |
| South Asia                 | 3929224<br>(3672984,4212721) | 277.4<br>(260.2,296.3) | 5045903<br>(4737984,5382675) | 277.8<br>(260.5,296.4) | 0.1<br>(0,0.3)      |
| Bangladesh                 | 425466<br>(386391,472996)    | 276<br>(252.5,304.7)   | 433543<br>(394804,478184)    | 276.8<br>(253.2,305.6) | 0.3<br>(0.2,0.3)    |
| Bhutan                     | 2243<br>(2045,2494)          | 276<br>(252.2,304.5)   | 1971<br>(1799,2168)          | 276<br>(252.4,304.8)   | 0<br>(-0.1,0.1)     |
| India                      | 2988495<br>(2798828,3193453) | 277.6<br>(261,295.6)   | 3739095<br>(3518140,3973898) | 277.9<br>(261.3,295.9) | 0.1<br>(0.1,0.1)    |
| Nepal                      | 74007<br>(67365,82068)       | 276.6<br>(253,305.3)   | 88697<br>(80789,98054)       | 277.4<br>(253.7,306.1) | 0.3<br>(0.2,0.3)    |
| Pakistan                   | 439012<br>(409842,470057)    | 277.2<br>(260.7,295.2) | 782596<br>(732900,836309)    | 277.7<br>(261.1,295.7) | 0.2<br>(0.1,0.2)    |
| Central Sub-Saharan Africa | 124324<br>(112638,137510)    | 159.5<br>(146.8,173.9) | 273029<br>(248123,301235)    | 159.5<br>(146.7,174)   | 0<br>(0,0)          |
| Angola                     | 22798<br>(20662,25199)       | 159.3<br>(146.6,173.7) | 65851<br>(59692,72837)       | 159.7<br>(147,174.2)   | 0.3<br>(0.2,0.3)    |
| Central African Republic   | 5961<br>(5408,6590)          | 159.5<br>(146.8,174)   | 10840<br>(9872,11962)        | 159.6<br>(146.9,174.1) | 0<br>(0,0.1)        |
| Congo                      | 5267                         | 159.7                  | 9907                         | 159.4                  | -0.2                |

|                                  |                           |                        |                           |                        |                     |
|----------------------------------|---------------------------|------------------------|---------------------------|------------------------|---------------------|
|                                  | (4793,5813)               | (147,174.2)            | (9040,10878)              | (146.7,174)            | (-0.2,-0.1)         |
| Democratic Republic of the Congo | 87241<br>(78991,96497)    | 159.5<br>(146.8,174)   | 180701<br>(164303,199307) | 159.4<br>(146.7,173.9) | -0.1<br>(-0.1,0)    |
| Equatorial Guinea                | 992<br>(898,1101)         | 159.6<br>(146.9,174.2) | 2686<br>(2449,2956)       | 158.5<br>(145.7,172.9) | -0.7<br>(-1,-0.5)   |
| Gabon                            | 2066<br>(1880,2277)       | 159.5<br>(146.8,174)   | 3045<br>(2789,3336)       | 159.7<br>(147,174.3)   | 0.1<br>(0,0.2)      |
| Eastern Sub-Saharan Africa       | 409253<br>(383233,437261) | 155.1<br>(146.7,164.5) | 831110<br>(779815,887034) | 157.6<br>(149.1,167.1) | 1.6<br>(0.5,2.8)    |
| Burundi                          | 12028<br>(11185,13052)    | 153.5<br>(143.9,164)   | 24576<br>(22846,26644)    | 153.2<br>(143.5,163.6) | -0.2<br>(-0.3,-0.1) |
| Comoros                          | 959<br>(892,1039)         | 153.2<br>(143.6,163.6) | 1164<br>(1087,1249)       | 153.1<br>(143.4,163.5) | -0.1<br>(-0.1,0)    |
| Djibouti                         | 1007<br>(937,1090)        | 152.3<br>(142.7,162.6) | 2083<br>(1943,2241)       | 152.2<br>(142.6,162.5) | -0.1<br>(-0.1,0)    |
| Eritrea                          | 6351<br>(5907,6886)       | 153.3<br>(143.6,163.6) | 12363<br>(11498,13349)    | 153.2<br>(143.5,163.6) | 0<br>(-0.1,0)       |
| Ethiopia                         | 100804<br>(94457,107200)  | 140.3<br>(132.8,148.1) | 197185<br>(185000,210531) | 143.2<br>(135.7,151.4) | 2<br>(-1.4,5.2)     |
| Kenya                            | 43383<br>(40788,46095)    | 134.9<br>(128.1,141.7) | 82707<br>(77444,87639)    | 141.1<br>(133.1,148.9) | 4.6<br>(1.3,8.5)    |
| Madagascar                       | 24965<br>(23226,27058)    | 153.1<br>(143.5,163.5) | 50681<br>(47139,54742)    | 153.1<br>(143.4,163.4) | 0<br>(0,0)          |
| Malawi                           | 20086<br>(18682,21747)    | 153.4<br>(143.7,163.8) | 35210<br>(32733,38148)    | 153.5<br>(143.8,164)   | 0.1<br>(0,0.1)      |
| Mozambique                       | 27086<br>(25167,29360)    | 153.6<br>(143.9,164)   | 61648<br>(57246,66835)    | 153.6<br>(143.9,164)   | 0<br>(0,0)          |
| Rwanda                           | 11241<br>(10325,12292)    | 112.1<br>(104.3,120.5) | 16648<br>(15394,18041)    | 112.1<br>(104.2,120.5) | 0<br>(-0.1,0)       |
| Somalia                          | 15030<br>(13936,16318)    | 152.7<br>(143.1,163)   | 42802<br>(39808,46374)    | 153.1<br>(143.4,163.4) | 0.2<br>(0.1,0.3)    |
| United Republic of Tanzania      | 69568<br>(64567,75156)    | 193.9<br>(181.8,207.7) | 142350<br>(132767,152611) | 192.1<br>(180.7,204.4) | -0.9<br>(-4.5,2.8)  |
| Uganda                           | 47800                     | 193.6                  | 106965                    | 193.6                  | 0                   |



|                             |                           |                        |                            |                        |                     |
|-----------------------------|---------------------------|------------------------|----------------------------|------------------------|---------------------|
|                             | (43754,52387)             | (179.2,209.7)          | (97816,117333)             | (179.1,209.7)          | (0,0.1)             |
| Zambia                      | 16855<br>(15680,18260)    | 153.3<br>(143.6,163.8) | 35549<br>(33056,38442)     | 153.3<br>(143.6,163.7) | 0<br>(-0.1,0)       |
| South Sudan                 | 11788<br>(10966,12754)    | 152.4<br>(142.7,162.7) | 18513<br>(17194,20032)     | 152.9<br>(143.3,163.2) | 0.3<br>(0.2,0.4)    |
| Southern Sub-Saharan Africa | 101286<br>(94704,109010)  | 160.7<br>(151.3,171.6) | 129378<br>(121579,138491)  | 160.5<br>(151.1,171.5) | -0.1<br>(-0.2,0)    |
| Botswana                    | 2685<br>(2439,2961)       | 159.8<br>(147.1,174.4) | 3807<br>(3495,4162)        | 159.5<br>(146.8,174)   | -0.2<br>(-0.3,-0.2) |
| Lesotho                     | 3637<br>(3312,4003)       | 159.6<br>(146.9,174.1) | 3478<br>(3187,3805)        | 159.6<br>(146.8,174.1) | 0<br>(-0.1,0)       |
| Namibia                     | 2892<br>(2635,3191)       | 159.6<br>(146.9,174.1) | 4322<br>(3955,4739)        | 159.7<br>(147,174.2)   | 0.1<br>(0,0.1)      |
| South Africa                | 67701<br>(63469,72186)    | 161.1<br>(151.7,171.1) | 86399<br>(81393,91661)     | 160.9<br>(151.5,170.8) | -0.2<br>(-0.2,-0.1) |
| Eswatini                    | 1805<br>(1637,1999)       | 159.9<br>(147.2,174.5) | 2067<br>(1889,2268)        | 159.4<br>(146.7,174)   | -0.3<br>(-0.4,-0.2) |
| Zimbabwe                    | 22566<br>(20489,24949)    | 159.6<br>(146.9,174.1) | 29304<br>(26713,32207)     | 159.8<br>(147.1,174.3) | 0.1<br>(0.1,0.2)    |
| Western Sub-Saharan Africa  | 431666<br>(405303,459428) | 161.6<br>(153.3,170.4) | 964390<br>(910096,1023571) | 162.2<br>(154,171)     | 0.4<br>(0,0.7)      |
| Benin                       | 11685<br>(10882,12501)    | 161.8<br>(152.4,171.8) | 28140<br>(26321,30059)     | 161.8<br>(152.5,171.8) | 0<br>(-0.1,0.1)     |
| Burkina Faso                | 22460<br>(20963,24017)    | 162<br>(152.6,172)     | 50609<br>(47328,54069)     | 161.9<br>(152.5,171.9) | -0.1<br>(-0.1,0)    |
| Cameroon                    | 26277<br>(24559,28254)    | 178<br>(167.6,189.7)   | 64746<br>(60812,68894)     | 178.6<br>(168.9,188.8) | 0.3<br>(-4.3,5)     |
| Cabo Verde                  | 762<br>(713,813)          | 162.3<br>(152.9,172.3) | 894<br>(843,949)           | 161.6<br>(152.4,171.6) | -0.4<br>(-0.5,-0.3) |
| Chad                        | 14341<br>(13372,15364)    | 162<br>(152.6,172)     | 39627<br>(36932,42410)     | 161.6<br>(152.3,171.7) | -0.2<br>(-0.3,-0.2) |
| Côte d'Ivoire               | 28071<br>(26210,30021)    | 161.3<br>(152,171.3)   | 53464<br>(50138,57048)     | 161.2<br>(151.9,171.2) | -0.1<br>(-0.1,0)    |
| Gambia                      | 2305                      | 161.6                  | 4537                       | 161.8                  | 0.1                 |

|                       |                           |                        |                           |                        |                     |
|-----------------------|---------------------------|------------------------|---------------------------|------------------------|---------------------|
|                       | (2152,2467)               | (152.3,171.6)          | (4260,4844)               | (152.4,171.8)          | (0,0.1)             |
| Ghana                 | 28164<br>(26367,30158)    | 137.4<br>(130,145.6)   | 49431<br>(46548,52620)    | 137.6<br>(130.1,145.7) | 0.1<br>(0.1,0.1)    |
| Guinea                | 14242<br>(13297,15237)    | 161.8<br>(152.4,171.8) | 27654<br>(25891,29529)    | 161.8<br>(152.5,171.9) | 0<br>(0,0.1)        |
| Guinea-Bissau         | 2298<br>(2148,2456)       | 162<br>(152.6,172)     | 3906<br>(3665,4170)       | 161.9<br>(152.5,171.9) | 0<br>(-0.1,0)       |
| Liberia               | 4247<br>(3980,4536)       | 161.8<br>(152.4,171.9) | 9178<br>(8625,9779)       | 161.4<br>(152.1,171.4) | -0.2<br>(-0.3,-0.2) |
| Mali                  | 21208<br>(19591,23087)    | 169.8<br>(158.4,181.9) | 52301<br>(48395,56682)    | 169.4<br>(158.3,181.6) | -0.2<br>(-3.9,3.6)  |
| Mauritania            | 4649<br>(4345,4969)       | 161.7<br>(152.3,171.7) | 7790<br>(7318,8304)       | 161.7<br>(152.4,171.7) | 0<br>(0,0)          |
| Niger                 | 19346<br>(18029,20725)    | 161.6<br>(152.3,171.6) | 57108<br>(53182,61151)    | 161.7<br>(152.4,171.7) | 0.1<br>(0,0.1)      |
| Nigeria               | 197113<br>(184703,210390) | 162.7<br>(154.1,171.9) | 452274<br>(424739,482293) | 162.9<br>(154.4,172)   | 0.1<br>(0,0.2)      |
| Sao Tome and Principe | 268<br>(251,287)          | 161.7<br>(152.4,171.7) | 368<br>(346,392)          | 161.6<br>(152.3,171.6) | -0.1<br>(-0.1,0)    |
| Senegal               | 17676<br>(16511,18897)    | 162<br>(152.6,172)     | 30015<br>(28189,32011)    | 161.5<br>(152.2,171.5) | -0.3<br>(-0.3,-0.2) |
| Sierra Leone          | 8007<br>(7487,8552)       | 161.9<br>(152.5,171.9) | 16689<br>(15670,17809)    | 161.7<br>(152.4,171.8) | -0.1<br>(-0.1,0)    |
| Togo                  | 8531<br>(7967,9120)       | 162<br>(152.6,172)     | 15645<br>(14685,16694)    | 161.8<br>(152.5,171.8) | -0.1<br>(-0.1,0)    |

AD=atopic dermatitis. SDI=socio-demographic index. 95% UI=95% uncertainty interval.

**Table S6.** Atopic dermatitis prevalence in 1990 and 2019 for both sexes and percentage change in age-standardized rates by location.

| Prevalence of atopic dermatitis       | 1990                               |                           | 2019                               |                           | Percentage change in age-standardized rates between 1990 and 2019 |
|---------------------------------------|------------------------------------|---------------------------|------------------------------------|---------------------------|-------------------------------------------------------------------|
|                                       | Counts (95% UI)                    | Rate (95% UI)             | Counts (95% UI)                    | Rate (95% UI)             |                                                                   |
| Global                                | 132711557<br>(127578684,138298569) | 2379.3<br>(2289.6,2478.1) | 171165029<br>(164821684,178101074) | 2277.2<br>(2192,2369.1)   | -4.3<br>(-4.8,-3.8)                                               |
| High SDI                              | 26474900<br>(25436028,27562608)    | 3671.3<br>(3517.7,3828.4) | 28627537<br>(27573950,29772435)    | 3530.4<br>(3376.2,3685.4) | -3.8<br>(-4.6,-3.2)                                               |
| High-middle SDI                       | 29614008<br>(28449647,30851638)    | 2625.5<br>(2521.2,2735)   | 34406431<br>(33114435,35754015)    | 2737<br>(2626.2,2850.4)   | 4.2<br>(3.5,5)                                                    |
| Low SDI                               | 9253763<br>(8812636,9736172)       | 1387.9<br>(1328,1455.4)   | 18795875<br>(17924238,19755041)    | 1358.7<br>(1300.7,1424.3) | -2.1<br>(-2.5,-1.7)                                               |
| Low-middle SDI                        | 25418366<br>(24254081,26746495)    | 1953.7<br>(1870,2044.6)   | 34744301<br>(33219700,36425079)    | 1903.1<br>(1822.7,1990.4) | -2.6<br>(-2.9,-2.3)                                               |
| Middle SDI                            | 41877365<br>(40171378,43625408)    | 2383.1<br>(2292.4,2475.8) | 54487015<br>(52366860,56651794)    | 2338.1<br>(2246.6,2433.6) | -1.9<br>(-2.8,-1)                                                 |
| East Asia                             | 29596079<br>(28414199,30676482)    | 2458.5<br>(2365.9,2545.6) | 37166586<br>(35754460,38611953)    | 2482.6<br>(2389,2575.1)   | 1<br>(-1.1,3.1)                                                   |
| China                                 | 28319011<br>(27213232,29338974)    | 2435<br>(2342.9,2519.9)   | 35583696<br>(34245384,36942010)    | 2460.2<br>(2366.6,2548.5) | 1<br>(-1.1,3.2)                                                   |
| Democratic People's Republic of Korea | 594756<br>(564300,628865)          | 2878.6<br>(2730.6,3041)   | 745423<br>(701981,788739)          | 2821.8<br>(2677.4,2980.1) | -2<br>(-2.1,-1.8)                                                 |
| Taiwan (Province of China)            | 682312<br>(635601,730370)          | 3363.9<br>(3147.9,3591.5) | 837467<br>(780475,903655)          | 3444.5<br>(3230.8,3683.3) | 2.4<br>(-0.7,5.5)                                                 |
| Southeast Asia                        | 15923108<br>(15221804,16660097)    | 3443.3<br>(3296,3596.4)   | 23136162<br>(22099532,24165231)    | 3433.1<br>(3281,3588.9)   | -0.3<br>(-1.3,0.6)                                                |
| Cambodia                              | 340386<br>(320652,360562)          | 3355.3<br>(3153.9,3562.1) | 543152<br>(509940,576844)          | 3279.1<br>(3081.6,3477.2) | -2.3<br>(-2.5,-2.1)                                               |
| Indonesia                             | 6819375                            | 3720.9                    | 9679480                            | 3733.9                    | 0.4                                                               |

|                                        |                              |                           |                              |                           |                     |
|----------------------------------------|------------------------------|---------------------------|------------------------------|---------------------------|---------------------|
|                                        | (6551175,7101920)            | (3591.1,3865.1)           | (9309402,10070022)           | (3595.7,3877)             | (-1.9,2.5)          |
| Lao People's<br>Democratic<br>Republic | 134343<br>(126699,142370)    | 3295.1<br>(3100.9,3498.1) | 231599<br>(217809,245544)    | 3252<br>(3060.4,3448.6)   | -1.3<br>(-1.4,-1.2) |
| Malaysia                               | 570385<br>(537453,605212)    | 3252.7<br>(3061.1,3448.3) | 1005823<br>(945185,1069887)  | 3210.7<br>(3022.6,3401.4) | -1.3<br>(-1.4,-1.2) |
| Maldives                               | 7082<br>(6677,7502)          | 3222.5<br>(3034.5,3419.3) | 14711<br>(13765,15685)       | 3008.6<br>(2838.1,3180.1) | -6.6<br>(-7.2,-6)   |
| Myanmar                                | 1329990<br>(1253125,1410594) | 3272.5<br>(3078.7,3472.4) | 1800266<br>(1689828,1914146) | 3303<br>(3105.2,3504.6)   | 0.9<br>(0.9,1)      |
| Philippines                            | 2045869<br>(1961553,2134885) | 3273.3<br>(3150.8,3404.7) | 3630980<br>(3490475,3782965) | 3259<br>(3137.7,3390.3)   | -0.4<br>(-0.5,-0.4) |
| Sri Lanka                              | 501936<br>(471579,533426)    | 2919<br>(2745.5,3098.3)   | 638927<br>(599617,679698)    | 2924.9<br>(2749.6,3106)   | 0.2<br>(-2.2,2.8)   |
| Thailand                               | 1854347<br>(1742419,1970918) | 3272.7<br>(3078.9,3472.3) | 2313096<br>(2162332,2472439) | 3268.8<br>(3074.6,3467.5) | -0.1<br>(-0.1,-0.1) |
| Timor-Leste                            | 24895<br>(23465,26359)       | 3228.2<br>(3038.4,3421.4) | 42834<br>(40415,45438)       | 3256.1<br>(3064.3,3454.1) | 0.9<br>(0.8,0.9)    |
| Viet Nam                               | 2235247<br>(2103634,2373801) | 3313.6<br>(3114.1,3516.7) | 3159949<br>(2964731,3372285) | 3259<br>(3064.8,3455.4)   | -1.6<br>(-1.8,-1.5) |
| Mauritius                              | 35720<br>(33577,37955)       | 3254.2<br>(3061,3451.5)   | 41799<br>(39073,44654)       | 3253.6<br>(3061,3451.1)   | 0<br>(0,0)          |
| Seychelles                             | 2366<br>(2230,2509)          | 3242.2<br>(3050.1,3437.8) | 3236<br>(3037,3453)          | 3167.5<br>(2982.5,3354.1) | -2.3<br>(-2.5,-2.1) |
| Oceania                                | 196873<br>(184768,209851)    | 3054<br>(2871.6,3249.3)   | 404272<br>(379441,430969)    | 3062.2<br>(2878.6,3257.6) | 0.3<br>(0.2,0.3)    |
| Fiji                                   | 23294<br>(21840,24840)       | 3071.4<br>(2888.5,3268)   | 27852<br>(26139,29676)       | 3064.8<br>(2883.3,3260.4) | -0.2<br>(-0.3,-0.2) |
| Kiribati                               | 2288<br>(2147,2441)          | 3103.1<br>(2918.8,3305.1) | 3678<br>(3449,3922)          | 3112.2<br>(2927.6,3315.3) | 0.3<br>(0.2,0.3)    |
| Marshall<br>Islands                    | 1411<br>(1321,1506)          | 3056.7<br>(2875.7,3252.2) | 1729<br>(1624,1845)          | 3056.3<br>(2874.2,3252.3) | 0<br>(-0.1,0.1)     |
| Micronesia<br>(Federated               | 3198<br>(2999,3410)          | 3059.5<br>(2877.8,3255)   | 3103<br>(2912,3307)          | 3063.3<br>(2881.8,3258.3) | 0.1<br>(0.1,0.2)    |

|                          |                              |                           |                              |                           |                     |
|--------------------------|------------------------------|---------------------------|------------------------------|---------------------------|---------------------|
| States of)               |                              |                           |                              |                           |                     |
| Papua New Guinea         | 124133<br>(116497,132318)    | 3050.7<br>(2868.5,3246)   | 300003<br>(281387,319874)    | 3058.8<br>(2875.4,3254.4) | 0.3<br>(0.2,0.3)    |
| Samoa                    | 4998<br>(4686,5334)          | 3045<br>(2863.4,3239.2)   | 6466<br>(6071,6886)          | 3056.2<br>(2874.2,3250.9) | 0.4<br>(0.3,0.5)    |
| Solomon Islands          | 10352<br>(9705,11045)        | 3051.2<br>(2867.4,3247.8) | 20059<br>(18827,21389)       | 3076.5<br>(2892,3274.3)   | 0.8<br>(0.7,0.9)    |
| Tonga                    | 2989<br>(2806,3186)          | 3099.3<br>(2913.5,3299.1) | 3172<br>(2983,3378)          | 3104.2<br>(2918.1,3306.1) | 0.2<br>(0.1,0.2)    |
| Vanuatu                  | 4646<br>(4355,4953)          | 3063.1<br>(2878.5,3259.7) | 9095<br>(8530,9697)          | 3080.6<br>(2895.6,3278.4) | 0.6<br>(0.5,0.6)    |
| American Samoa           | 1476<br>(1385,1574)          | 3062.2<br>(2879.9,3258.7) | 1698<br>(1592,1807)          | 3083<br>(2898.7,3281.8)   | 0.7<br>(0.6,0.8)    |
| Cook Islands             | 579<br>(543,616)             | 3049.5<br>(2866.8,3244.5) | 560<br>(527,597)             | 3121.3<br>(2933.5,3323)   | 2.4<br>(2.2,2.6)    |
| Guam                     | 4069<br>(3810,4342)          | 3010.4<br>(2831.2,3203.1) | 5187<br>(4883,5526)          | 3043.4<br>(2862.3,3238.1) | 1.1<br>(1,1.2)      |
| Nauru                    | 312<br>(292,333)             | 3053<br>(2871.7,3248.5)   | 322<br>(302,344)             | 3085.4<br>(2903.7,3285.3) | 1.1<br>(0.9,1.2)    |
| Niue                     | 72<br>(68,76)                | 3066.9<br>(2884.7,3264)   | 51<br>(48,55)                | 3070.1<br>(2887.8,3267.3) | 0.1<br>(0,0.2)      |
| Northern Mariana Islands | 1350<br>(1261,1445)          | 3009.6<br>(2831.2,3200)   | 1273<br>(1189,1360)          | 3039.3<br>(2859.8,3233.8) | 1<br>(0.6,1.3)      |
| Palau                    | 466<br>(437,497)             | 3051.8<br>(2870.2,3246.7) | 528<br>(495,564)             | 2962.3<br>(2790,3151.8)   | -2.9<br>(-3.2,-2.7) |
| Tokelau                  | 52<br>(49,56)                | 3102.4<br>(2915.8,3305.7) | 43<br>(41,46)                | 3059.2<br>(2878.5,3254.8) | -1.4<br>(-1.6,-1.2) |
| Tuvalu                   | 293<br>(275,312)             | 3149.5<br>(2960.6,3355.7) | 357<br>(336,381)             | 3037.1<br>(2858.5,3231.9) | -3.6<br>(-3.9,-3.3) |
| Central Asia             | 3826625<br>(3414578,4266075) | 4707.9<br>(4235.2,5221.3) | 4425087<br>(3987427,4916631) | 4678.1<br>(4209.7,5192.3) | -0.6<br>(-0.8,-0.5) |
| Armenia                  | 168872<br>(151846,187488)    | 4696<br>(4223.4,5208.4)   | 115036<br>(104211,127026)    | 4654.6<br>(4188.3,5164)   | -0.9<br>(-1,-0.7)   |

|                        |                              |                           |                              |                           |                     |
|------------------------|------------------------------|---------------------------|------------------------------|---------------------------|---------------------|
| Azerbaijan             | 385299<br>(345569,428492)    | 4701.6<br>(4229.8,5213.7) | 418418<br>(378384,463809)    | 4640.2<br>(4174.5,5149.3) | -1.3<br>(-1.5,-1.2) |
| Georgia                | 240830<br>(217779,266775)    | 4710.2<br>(4238.6,5222.9) | 136736<br>(124280,151313)    | 4611.6<br>(4161.8,5162.6) | -2.1<br>(-7,3.2)    |
| Kazakhstan             | 827705<br>(742626,920096)    | 4710.1<br>(4237.7,5223.3) | 846782<br>(763446,940263)    | 4698.4<br>(4225.9,5211.1) | -0.2<br>(-0.3,-0.2) |
| Kyrgyzstan             | 252902<br>(225454,282312)    | 4710.6<br>(4238.2,5224.4) | 333101<br>(298966,370657)    | 4691.1<br>(4219,5204.1)   | -0.4<br>(-0.5,-0.4) |
| Mongolia               | 131052<br>(116654,146836)    | 4697.5<br>(4224.1,5212.9) | 164367<br>(147711,182977)    | 4697.4<br>(4225,5210.9)   | 0<br>(-0.1,0.1)     |
| Tajikistan             | 335652<br>(297746,376244)    | 4700.6<br>(4227.1,5214.8) | 504125<br>(451142,561639)    | 4673.8<br>(4203,5187.6)   | -0.6<br>(-0.6,-0.5) |
| Turkmenistan           | 221379<br>(197057,247863)    | 4707.5<br>(4235,5221.2)   | 244653<br>(219700,272002)    | 4654.1<br>(4185.6,5167.2) | -1.1<br>(-1.3,-1)   |
| Uzbekistan             | 1262932<br>(1123567,1414204) | 4706.5<br>(4233.1,5220.5) | 1661869<br>(1492353,1848671) | 4680.6<br>(4209.8,5193.2) | -0.5<br>(-0.6,-0.5) |
| Central Europe         | 2053272<br>(1975199,2139444) | 1902<br>(1827.6,1984.2)   | 1520915<br>(1474285,1571128) | 1887.8<br>(1820.6,1959.3) | -0.7<br>(-1.6,0.1)  |
| Albania                | 73013<br>(69521,76878)       | 1968<br>(1877.1,2067.6)   | 40768<br>(39145,42499)       | 1971.4<br>(1879.6,2071.1) | 0.2<br>(0.1,0.2)    |
| Bosnia and Herzegovina | 81430<br>(77766,85268)       | 1973.5<br>(1881.8,2072.9) | 44831<br>(43169,46637)       | 1974.6<br>(1883.2,2074)   | 0.1<br>(0,0.1)      |
| Bulgaria               | 137589<br>(131833,143652)    | 1975.6<br>(1884.2,2075)   | 92532<br>(89004,96224)       | 1971.7<br>(1880.3,2071.3) | -0.2<br>(-0.2,-0.2) |
| Croatia                | 78112<br>(74817,81599)       | 1975.8<br>(1884.2,2075.1) | 56998<br>(54856,59253)       | 1973.3<br>(1881.9,2072.8) | -0.1<br>(-0.1,-0.1) |
| Czechia                | 167003<br>(159818,174523)    | 1976<br>(1884.5,2075.3)   | 149767<br>(143942,156032)    | 1971.7<br>(1880.4,2071.3) | -0.2<br>(-0.2,-0.2) |
| Hungary                | 226196<br>(211578,241023)    | 2703.9<br>(2520.4,2894.7) | 179492<br>(169057,190185)    | 2698.5<br>(2515.1,2888.9) | -0.2<br>(-0.2,-0.2) |
| North Macedonia        | 37936<br>(36205,39804)       | 1973.4<br>(1881.8,2073)   | 30650<br>(29445,31942)       | 1968.9<br>(1877.4,2068.6) | -0.2<br>(-0.2,-0.2) |
| Montenegro             | 11612<br>(11086,12175)       | 1974.1<br>(1882.5,2073.6) | 9231<br>(8859,9626)          | 1972.2<br>(1880.7,2071.9) | -0.1<br>(-0.1,-0.1) |

|                          |                              |                           |                              |                           |                     |
|--------------------------|------------------------------|---------------------------|------------------------------|---------------------------|---------------------|
| Poland                   | 669745<br>(645512,695598)    | 1932.1<br>(1859.9,2007.6) | 498881<br>(488170,509499)    | 1841.6<br>(1795.6,1889.7) | -4.7<br>(-6.8,-2.4) |
| Romania                  | 285619<br>(273138,298381)    | 1376.6<br>(1314.2,1442.6) | 186176<br>(178960,193499)    | 1386.8<br>(1322.8,1451.2) | 0.7<br>(-2.2,4.1)   |
| Serbia                   | 158056<br>(151115,165452)    | 1977.7<br>(1886.5,2077.4) | 126904<br>(121900,132211)    | 1970.5<br>(1878.8,2070.3) | -0.4<br>(-0.6,-0.1) |
| Slovakia                 | 94925<br>(90669,99455)       | 1977.4<br>(1886,2076.8)   | 76278<br>(73363,79408)       | 1973.1<br>(1881.8,2072.6) | -0.2<br>(-0.2,-0.2) |
| Slovenia                 | 32038<br>(30641,33483)       | 1976.1<br>(1884.5,2075.6) | 28408<br>(27341,29557)       | 1969.3<br>(1878,2069)     | -0.3<br>(-0.4,-0.3) |
| Eastern Europe           | 6002557<br>(5773341,6229483) | 3043.9<br>(2919.2,3164.3) | 4825864<br>(4664283,4994087) | 3093.6<br>(2976.8,3215)   | 1.6<br>(0.7,2.4)    |
| Belarus                  | 192634<br>(184164,202094)    | 2088.4<br>(1990.7,2195.6) | 146741<br>(140842,153455)    | 2081<br>(1983.6,2188.1)   | -0.4<br>(-0.4,-0.3) |
| Estonia                  | 65008<br>(62170,68234)       | 4801<br>(4583.1,5052.2)   | 44733<br>(42901,46831)       | 4786.6<br>(4568.9,5037.4) | -0.3<br>(-0.3,-0.3) |
| Latvia                   | 30122<br>(28397,32138)       | 1346.6<br>(1264.8,1440.4) | 17765<br>(16788,18824)       | 1343.1<br>(1258.9,1437.6) | -0.3<br>(-3.8,3.3)  |
| Lithuania                | 66772<br>(63877,70052)       | 2087.3<br>(1989.8,2194.3) | 40206<br>(38644,41962)       | 2081<br>(1983.6,2188.1)   | -0.3<br>(-0.3,-0.3) |
| Republic of Moldova      | 91704<br>(87459,96348)       | 2090.3<br>(1992.6,2197.8) | 53128<br>(51081,55535)       | 2079.9<br>(1982.5,2186.8) | -0.5<br>(-0.5,-0.5) |
| Russian Federation       | 4606164<br>(4427694,4774513) | 3474.8<br>(3331.5,3609)   | 3869956<br>(3738603,4007379) | 3454.3<br>(3324.1,3584.2) | -0.6<br>(-1.7,0.4)  |
| Ukraine                  | 950153<br>(911381,990512)    | 2144.4<br>(2050.6,2242.1) | 653335<br>(628503,679203)    | 2137.9<br>(2044.6,2235.7) | -0.3<br>(-0.3,-0.3) |
| High-income Asia Pacific | 7192652<br>(6885440,7519227) | 4893.8<br>(4664.7,5124.6) | 6399405<br>(6152746,6655228) | 4876.2<br>(4638.6,5113.1) | -0.4<br>(-2.8,2)    |
| Brunei Darussalam        | 11705<br>(11049,12375)       | 3996.1<br>(3785.8,4224.8) | 15167<br>(14374,16003)       | 4001<br>(3789.6,4230.3)   | 0.1<br>(0.1,0.2)    |
| Japan                    | 5398235<br>(5172955,5636566) | 5328.1<br>(5087.5,5579.2) | 4733475<br>(4564792,4911901) | 5324.3<br>(5072.2,5571.1) | -0.1<br>(-3.1,2.8)  |
| Republic of Korea        | 1688076<br>(1586226,1790375) | 4011<br>(3775.7,4252.7)   | 1505877<br>(1421559,1588920) | 4036.3<br>(3801.4,4273.9) | 0.6<br>(-3.3,4.9)   |

|                |                                 |                           |                                 |                           |                     |
|----------------|---------------------------------|---------------------------|---------------------------------|---------------------------|---------------------|
| Singapore      | 94636<br>(87320,102720)         | 3630.1<br>(3342.7,3934.7) | 144885<br>(134448,155700)       | 3598.6<br>(3303.4,3899.7) | -0.9<br>(-5.3,3.7)  |
| Australasia    | 478980<br>(452440,508884)       | 2649.2<br>(2491.7,2819.6) | 631684<br>(596131,668333)       | 2643.5<br>(2472.1,2814.5) | -0.2<br>(-3.5,3.3)  |
| Australia      | 375442<br>(351721,402019)       | 2506.3<br>(2336.8,2696.1) | 503942<br>(472308,536687)       | 2503.2<br>(2322.3,2689.6) | -0.1<br>(-4.2,4.5)  |
| New Zealand    | 103538<br>(99185,108145)        | 3339<br>(3190.2,3495.7)   | 127742<br>(122623,133247)       | 3385.8<br>(3232.6,3539.8) | 1.4<br>(-2.1,4.8)   |
| Western Europe | 12745775<br>(12135193,13379809) | 4042<br>(3830.4,4269.4)   | 13573982<br>(12967130,14225684) | 4049<br>(3835.8,4281.4)   | 0.2<br>(-0.5,0.9)   |
| Andorra        | 1581<br>(1507,1663)             | 3682.2<br>(3495.3,3893)   | 2146<br>(2051,2247)             | 3703.4<br>(3515.6,3916.3) | 0.6<br>(0.5,0.6)    |
| Austria        | 233308<br>(222597,244751)       | 3716.8<br>(3529.3,3929.1) | 247239<br>(236579,258786)       | 3705.6<br>(3518.2,3917.9) | -0.3<br>(-0.3,-0.3) |
| Belgium        | 301267<br>(287339,316279)       | 3713.4<br>(3525.6,3925.8) | 335530<br>(320824,351945)       | 3713.9<br>(3526.1,3926.8) | 0<br>(0,0)          |
| Cyprus         | 25471<br>(23087,28081)          | 3490.4<br>(3161.3,3850.3) | 35107<br>(32034,38386)          | 3484.3<br>(3150.5,3840.7) | -0.2<br>(-4.7,4.8)  |
| Denmark        | 186577<br>(171074,203494)       | 4550.7<br>(4109.7,5035.9) | 209912<br>(192884,228879)       | 4621.4<br>(4196,5104.8)   | 1.6<br>(-3.1,6.3)   |
| Finland        | 154020<br>(147011,161851)       | 3717.5<br>(3529.7,3930)   | 158818<br>(151999,166598)       | 3709.3<br>(3521.5,3921.8) | -0.2<br>(-0.3,-0.2) |
| France         | 2535881<br>(2344336,2743871)    | 5086.8<br>(4681,5531.3)   | 2733866<br>(2547540,2950724)    | 5087.2<br>(4681.4,5531.2) | 0<br>(0,0)          |
| Germany        | 2228764<br>(2134606,2322062)    | 3586.5<br>(3423.7,3750.5) | 2267043<br>(2171310,2367374)    | 3624.5<br>(3439.9,3816.2) | 1.1<br>(-2.4,4.7)   |
| Greece         | 250263<br>(229391,272509)       | 2929.8<br>(2665,3200)     | 222833<br>(205919,241248)       | 2951.2<br>(2685.9,3234.7) | 0.7<br>(-3.5,5.8)   |
| Iceland        | 10107<br>(9092,11159)           | 4238.9<br>(3809.4,4687.4) | 12101<br>(10988,13299)          | 4210.7<br>(3792.5,4665)   | -0.7<br>(-5.4,4)    |
| Ireland        | 130792<br>(124289,138093)       | 3713.3<br>(3525.6,3926)   | 155895<br>(148686,163947)       | 3717.7<br>(3530,3931.1)   | 0.1<br>(0.1,0.1)    |
| Israel         | 193245<br>(183245,204640)       | 3719.3<br>(3532,3932.5)   | 342894<br>(325902,362122)       | 3713.4<br>(3525.9,3926.2) | -0.2<br>(-0.2,-0.1) |



|                           |                              |                           |                              |                           |                     |
|---------------------------|------------------------------|---------------------------|------------------------------|---------------------------|---------------------|
| Italy                     | 1897785<br>(1820026,1976419) | 4284.7<br>(4074.2,4487.3) | 1864583<br>(1794445,1937870) | 4276.3<br>(4066.2,4479.5) | -0.2<br>(-0.2,-0.2) |
| Luxembourg                | 11281<br>(10761,11834)       | 3714.5<br>(3526.7,3926.6) | 17586<br>(16817,18438)       | 3704.9<br>(3517.5,3917.2) | -0.3<br>(-0.3,-0.2) |
| Malta                     | 12437<br>(11847,13104)       | 3713.9<br>(3526.4,3926.3) | 12133<br>(11614,12712)       | 3700.6<br>(3513.4,3912.1) | -0.4<br>(-0.4,-0.3) |
| Netherlands               | 454517<br>(433795,477478)    | 3713.9<br>(3526.1,3926.4) | 491633<br>(470479,515388)    | 3711.6<br>(3524,3924.5)   | -0.1<br>(-0.1,0)    |
| Norway                    | 146449<br>(140289,152677)    | 4144.5<br>(3943.4,4341.4) | 177656<br>(170621,185286)    | 4165.6<br>(3972.3,4376.6) | 0.5<br>(-2.7,4.2)   |
| Portugal                  | 322360<br>(307637,339595)    | 3723.9<br>(3536.4,3937.3) | 286731<br>(274563,299636)    | 3722.6<br>(3535,3936.2)   | 0<br>(0,0)          |
| Spain                     | 1099090<br>(1004185,1200771) | 3381<br>(3068.7,3702.9)   | 1148895<br>(1060727,1245754) | 3377.1<br>(3064.5,3699)   | -0.1<br>(-0.1,-0.1) |
| Sweden                    | 262026<br>(252136,271983)    | 3747.5<br>(3583.4,3912.2) | 308419<br>(296772,319718)    | 3740.3<br>(3576.4,3904.8) | -0.2<br>(-0.2,-0.2) |
| Switzerland               | 201961<br>(192734,211809)    | 3710.4<br>(3522.7,3922.7) | 245765<br>(235056,257259)    | 3705.5<br>(3518,3917.9)   | -0.1<br>(-0.2,-0.1) |
| United Kingdom            | 2074486<br>(1990659,2157107) | 4344.6<br>(4145,4541.2)   | 2283384<br>(2199550,2372174) | 4250.1<br>(4066.4,4444.8) | -2.2<br>(-4.5,0.5)  |
| Monaco                    | 790<br>(757,827)             | 3708.7<br>(3522,3920.4)   | 1019<br>(975,1066)           | 3724.7<br>(3535.8,3939.6) | 0.4<br>(0.3,0.5)    |
| San Marino                | 734<br>(700,772)             | 3720.6<br>(3532.4,3933.4) | 959<br>(918,1006)            | 3730<br>(3542.3,3944.7)   | 0.3<br>(0.2,0.3)    |
| Southern Latin America    | 1557988<br>(1462161,1662340) | 3057.7<br>(2871.4,3259.7) | 1826016<br>(1722949,1937851) | 3052<br>(2866.3,3253.5)   | -0.2<br>(-0.2,-0.2) |
| Argentina                 | 1047323<br>(982735,1117719)  | 3058.2<br>(2871.9,3260.3) | 1261656<br>(1189577,1340602) | 3053.7<br>(2867.9,3255.3) | -0.1<br>(-0.2,-0.1) |
| Chile                     | 418715<br>(393059,446955)    | 3056.6<br>(2870.6,3258.3) | 473054<br>(447327,500728)    | 3047.2<br>(2861.7,3248.3) | -0.3<br>(-0.3,-0.3) |
| Uruguay                   | 91888<br>(86532,97692)       | 3054.9<br>(2869.1,3256.5) | 91215<br>(86333,96541)       | 3052.9<br>(2867.5,3254.2) | -0.1<br>(-0.1,0)    |
| High-income North America | 7937904<br>(7661589,8218256) | 3151.3<br>(3033.3,3267.2) | 9206840<br>(8920125,9490573) | 3022.4<br>(2912.5,3127.9) | -4.1<br>(-4.8,-3.4) |

|                             |                              |                           |                              |                           |                     |
|-----------------------------|------------------------------|---------------------------|------------------------------|---------------------------|---------------------|
| Canada                      | 475269<br>(457481,495291)    | 1984<br>(1904.5,2072.7)   | 594932<br>(574092,618546)    | 1984.5<br>(1904.9,2073.1) | 0<br>(0,0)          |
| United States<br>of America | 7461414<br>(7201374,7724752) | 3274.4<br>(3152,3398.2)   | 8610796<br>(8334298,8884463) | 3131.8<br>(3018,3240.7)   | -4.4<br>(-5.1,-3.6) |
| Greenland                   | 1039<br>(996,1085)           | 1965.9<br>(1886.8,2054.5) | 965<br>(929,1007)            | 1976.2<br>(1896.8,2065.5) | 0.5<br>(0.5,0.6)    |
| Caribbean                   | 730813<br>(681212,786262)    | 1932.2<br>(1808.5,2072.8) | 856709<br>(803276,916839)    | 1930.5<br>(1807,2070.9)   | -0.1<br>(-0.1,-0.1) |
| Antigua and<br>Barbuda      | 1228<br>(1147,1321)          | 1934.5<br>(1810.8,2075.1) | 1444<br>(1359,1540)          | 1930.6<br>(1807.3,2071.1) | -0.2<br>(-0.2,-0.2) |
| Bahamas                     | 5246<br>(4893,5640)          | 1933<br>(1809.5,2073.7)   | 6392<br>(6007,6832)          | 1934.2<br>(1810.5,2075)   | 0.1<br>(0,0.1)      |
| Barbados                    | 4637<br>(4351,4963)          | 1932.9<br>(1809.6,2073.7) | 4608<br>(4346,4904)          | 1930.1<br>(1806.7,2070.5) | -0.1<br>(-0.2,-0.1) |
| Belize                      | 4505<br>(4174,4857)          | 1928.9<br>(1805.4,2069.3) | 8153<br>(7609,8759)          | 1930.5<br>(1806.8,2070.8) | 0.1<br>(0,0.1)      |
| Cuba                        | 194666<br>(182578,208194)    | 1927.5<br>(1804.2,2067.7) | 173165<br>(163677,184211)    | 1926.4<br>(1803.4,2066.8) | -0.1<br>(-0.1,0)    |
| Dominica                    | 1548<br>(1441,1665)          | 1927.3<br>(1804.6,2068)   | 1164<br>(1094,1245)          | 1926.8<br>(1803.4,2066.9) | 0<br>(-0.1,0.1)     |
| Dominican<br>Republic       | 161943<br>(150462,174446)    | 1933.8<br>(1809.8,2074.4) | 209108<br>(195559,224488)    | 1928.9<br>(1805.5,2069.4) | -0.3<br>(-0.3,-0.2) |
| Grenada                     | 1921<br>(1785,2068)          | 1931.7<br>(1808.4,2072.4) | 1772<br>(1665,1893)          | 1925.6<br>(1802.6,2065.7) | -0.3<br>(-0.4,-0.3) |
| Guyana                      | 17048<br>(15844,18361)       | 1933.4<br>(1809.7,2074.1) | 14688<br>(13733,15749)       | 1931<br>(1807.6,2071.5)   | -0.1<br>(-0.2,-0.1) |
| Haiti                       | 150401<br>(139501,162311)    | 1936.8<br>(1812.6,2077.7) | 263827<br>(245549,283700)    | 1934<br>(1810.3,2074.6)   | -0.1<br>(-0.2,-0.1) |
| Jamaica                     | 51354<br>(47776,55287)       | 1932.8<br>(1809.1,2073.4) | 48908<br>(45963,52270)       | 1929.7<br>(1806.4,2070)   | -0.2<br>(-0.2,-0.1) |
| Saint Lucia                 | 3105<br>(2885,3341)          | 1934.9<br>(1811.3,2075.7) | 2801<br>(2639,2988)          | 1929.4<br>(1806.1,2069.7) | -0.3<br>(-0.3,-0.2) |
| Saint Vincent<br>and the    | 2476<br>(2302,2666)          | 1931<br>(1807.7,2071.7)   | 1952<br>(1834,2085)          | 1927.3<br>(1804.1,2067.4) | -0.2<br>(-0.2,-0.1) |

|                                  |                              |                           |                              |                           |                     |
|----------------------------------|------------------------------|---------------------------|------------------------------|---------------------------|---------------------|
| Grenadines                       |                              |                           |                              |                           |                     |
| Suriname                         | 8218<br>(7649,8840)          | 1930.3<br>(1807.2,2071)   | 10551<br>(9887,11298)        | 1929.1<br>(1805.7,2069.4) | -0.1<br>(-0.1,0)    |
| Trinidad and Tobago              | 25464<br>(23721,27394)       | 1930.4<br>(1807,2070.9)   | 22707<br>(21349,24223)       | 1928.4<br>(1805.1,2068.7) | -0.1<br>(-0.1,-0.1) |
| Bermuda                          | 989<br>(932,1057)            | 1932.6<br>(1809.1,2073.3) | 924<br>(875,981)             | 1931.5<br>(1807.9,2072)   | -0.1<br>(-0.1,0)    |
| Puerto Rico                      | 68751<br>(64354,73696)       | 1931.8<br>(1808.2,2072.2) | 52851<br>(49922,56130)       | 1930.6<br>(1807.2,2071)   | -0.1<br>(-0.1,0)    |
| Saint Kitts and Nevis            | 881<br>(820,948)             | 1932.3<br>(1809,2073)     | 981<br>(922,1047)            | 1930.5<br>(1806.9,2070.8) | -0.1<br>(-0.1,-0.1) |
| United States Virgin Islands     | 2087<br>(1951,2238)          | 1933.9<br>(1810.1,2074.4) | 1692<br>(1595,1803)          | 1932.3<br>(1808.8,2072.7) | -0.1<br>(-0.1,0)    |
| Andean Latin America             | 842540<br>(801336,885935)    | 1871.6<br>(1790.8,1957.5) | 1199021<br>(1145684,1254867) | 1879.9<br>(1799.5,1967.5) | 0.4<br>(-0.5,1.4)   |
| Bolivia (Plurinational State of) | 150816<br>(142883,158356)    | 1922<br>(1832.4,2012)     | 247407<br>(235529,259034)    | 1919.1<br>(1829.6,2008.8) | -0.2<br>(-0.2,-0.1) |
| Ecuador                          | 246688<br>(232674,261946)    | 2099.1<br>(1992.5,2216.9) | 372292<br>(352929,393019)    | 2099.7<br>(1991.7,2215.2) | 0<br>(-3.1,3.3)     |
| Peru                             | 445036<br>(422881,469170)    | 1751.5<br>(1676.5,1837.5) | 579323<br>(554127,607045)    | 1747.9<br>(1672.8,1833.6) | -0.2<br>(-0.3,-0.1) |
| Central Latin America            | 2835208<br>(2687605,2997894) | 1449.3<br>(1380.5,1522.6) | 3491355<br>(3327396,3663728) | 1448<br>(1376.8,1522.7)   | -0.1<br>(-0.2,0)    |
| Colombia                         | 535189<br>(500737,571957)    | 1442.3<br>(1354.9,1534.8) | 626152<br>(590166,662073)    | 1440.9<br>(1354.2,1533.3) | -0.1<br>(-0.1,0)    |
| Costa Rica                       | 50696<br>(47421,54241)       | 1440.4<br>(1353.6,1532.8) | 61045<br>(57500,64505)       | 1442.3<br>(1355.2,1534.8) | 0.1<br>(0.1,0.2)    |
| El Salvador                      | 91777<br>(85764,98320)       | 1443.2<br>(1355.9,1535.4) | 89766<br>(84352,95374)       | 1443.8<br>(1356.9,1535.6) | 0<br>(0,0.1)        |
| Guatemala                        | 148389<br>(138384,159396)    | 1442.4<br>(1355.1,1534.9) | 279863<br>(262023,298525)    | 1442.6<br>(1355.7,1535.1) | 0<br>(0,0.1)        |
| Honduras                         | 89390<br>(83333,96067)       | 1441.8<br>(1354.7,1534.2) | 156164<br>(146299,166624)    | 1442.6<br>(1355.5,1534.8) | 0.1<br>(0,0.1)      |

|                                          |                              |                           |                              |                           |                     |
|------------------------------------------|------------------------------|---------------------------|------------------------------|---------------------------|---------------------|
| Mexico                                   | 1490065<br>(1410020,1569754) | 1455.9<br>(1386,1524.9)   | 1742113<br>(1661524,1826210) | 1454.6<br>(1384.8,1523.6) | -0.1<br>(-0.1,-0.1) |
| Nicaragua                                | 74358<br>(69307,79916)       | 1443.5<br>(1356,1536.1)   | 98521<br>(92450,104997)      | 1441.2<br>(1354.4,1533.6) | -0.2<br>(-0.2,-0.1) |
| Panama                                   | 38676<br>(36205,41340)       | 1439.7<br>(1352.9,1532.1) | 59097<br>(55554,62833)       | 1439.5<br>(1352.8,1531.7) | 0<br>(0,0)          |
| Venezuela<br>(Bolivarian<br>Republic of) | 316668<br>(295988,339177)    | 1441.5<br>(1354.3,1534.1) | 378635<br>(356523,401550)    | 1441.4<br>(1354.4,1533.7) | 0<br>(0,0)          |
| Tropical Latin<br>America                | 4002690<br>(3812949,4187736) | 2367.6<br>(2263.4,2472.6) | 4780273<br>(4595096,4976073) | 2363.3<br>(2263.7,2469)   | -0.2<br>(-2.7,2.2)  |
| Brazil                                   | 3885821<br>(3699402,4069172) | 2366.3<br>(2261.9,2470.8) | 4612826<br>(4435672,4803262) | 2361.5<br>(2262.7,2468.1) | -0.2<br>(-2.8,2.3)  |
| Paraguay                                 | 116869<br>(108932,124729)    | 2413.6<br>(2277.2,2552.2) | 167446<br>(157981,177012)    | 2410.9<br>(2274.7,2549.4) | -0.1<br>(-0.1,-0.1) |
| North Africa<br>and Middle<br>East       | 5847936<br>(5513972,6205736) | 1462.2<br>(1381.2,1547.1) | 8743082<br>(8252290,9265851) | 1393.8<br>(1317.1,1474.2) | -4.7<br>(-5.7,-3.6) |
| Algeria                                  | 399629<br>(376597,425961)    | 1344.5<br>(1270.9,1426.7) | 571087<br>(539369,605622)    | 1343.6<br>(1270,1425.8)   | -0.1<br>(-0.1,0)    |
| Bahrain                                  | 7427<br>(6993,7900)          | 1322.3<br>(1251.5,1403)   | 16904<br>(15847,18031)       | 1320.9<br>(1250.1,1401.5) | -0.1<br>(-0.2,0)    |
| Egypt                                    | 570232<br>(525060,618726)    | 885<br>(822.6,954)        | 910557<br>(840511,982312)    | 853.9<br>(790.8,920.1)    | -3.5<br>(-7.9,0.5)  |
| Iran (Islamic<br>Republic of)            | 957474<br>(909621,1007178)   | 1353.7<br>(1293.4,1416)   | 1114244<br>(1064945,1164967) | 1360.9<br>(1303.7,1422)   | 0.5<br>(-2.6,3.6)   |
| Iraq                                     | 284735<br>(260828,307560)    | 1340.2<br>(1242.1,1441)   | 612773<br>(565693,660983)    | 1339.5<br>(1241.5,1440.2) | -0.1<br>(-0.1,0)    |
| Jordan                                   | 60589<br>(57033,64545)       | 1338.2<br>(1265.2,1420.1) | 166278<br>(156851,176780)    | 1334.6<br>(1262.1,1416.2) | -0.3<br>(-0.3,-0.2) |
| Kuwait                                   | 25808<br>(24308,27441)       | 1322.3<br>(1251.1,1402.6) | 56432<br>(52861,60207)       | 1335.6<br>(1262.6,1417.3) | 1<br>(0.8,1.2)      |
| Lebanon                                  | 48682<br>(45878,51844)       | 1345.1<br>(1271.5,1427.4) | 68870<br>(65078,72953)       | 1345.8<br>(1272,1428)     | 0<br>(0,0.1)        |

|                      |                                 |                           |                                 |                           |                     |
|----------------------|---------------------------------|---------------------------|---------------------------------|---------------------------|---------------------|
| Libya                | 67672<br>(63659,72172)          | 1336.9<br>(1264.2,1418.2) | 86907<br>(81772,92327)          | 1340.8<br>(1267.7,1422.8) | 0.3<br>(0.2,0.4)    |
| Morocco              | 386454<br>(364283,411773)       | 1347.6<br>(1273.7,1429.7) | 478768<br>(452160,507992)       | 1344.8<br>(1271.2,1427.1) | -0.2<br>(-0.2,-0.2) |
| Palestine            | 34099<br>(32010,36403)          | 1347<br>(1273.1,1429.4)   | 75258<br>(70944,80145)          | 1343.4<br>(1270,1425.6)   | -0.3<br>(-0.3,-0.2) |
| Oman                 | 30579<br>(28737,32605)          | 1315.9<br>(1245.1,1397)   | 60748<br>(56923,64833)          | 1310.1<br>(1239.8,1391.1) | -0.4<br>(-0.5,-0.3) |
| Qatar                | 6171<br>(5799,6573)             | 1298<br>(1228.7,1378.4)   | 34197<br>(31919,36767)          | 1284.8<br>(1214.8,1362.9) | -1<br>(-1.2,-0.8)   |
| Saudi Arabia         | 251742<br>(236916,268088)       | 1323.3<br>(1251.8,1404.1) | 458205<br>(429886,488517)       | 1321.7<br>(1250.4,1402.6) | -0.1<br>(-0.2,-0.1) |
| Syrian Arab Republic | 210748<br>(198148,224753)       | 1342.3<br>(1269,1424.5)   | 193870<br>(183132,205660)       | 1353.1<br>(1279,1435.7)   | 0.8<br>(0.6,1)      |
| Tunisia              | 127396<br>(120138,135719)       | 1344.4<br>(1270.8,1426.5) | 146246<br>(137760,155065)       | 1345.2<br>(1271.7,1427.5) | 0.1<br>(0,0.1)      |
| Turkey               | 1616055<br>(1508187,1745003)    | 2455.5<br>(2296.6,2641.1) | 1836726<br>(1707110,1974616)    | 2458.3<br>(2281,2630.3)   | 0.1<br>(-3.4,4)     |
| United Arab Emirates | 27156<br>(25536,28925)          | 1302.1<br>(1232.7,1383.2) | 104376<br>(96918,112648)        | 1300.7<br>(1231.5,1381.5) | -0.1<br>(-0.2,0)    |
| Yemen                | 232408<br>(217905,248365)       | 1344.5<br>(1271.3,1427.2) | 493684<br>(465111,526166)       | 1344.8<br>(1271.3,1427.1) | 0<br>(0,0.1)        |
| Afghanistan          | 177869<br>(167426,189666)       | 1352.1<br>(1278,1434.8)   | 621518<br>(583921,662686)       | 1342.4<br>(1269.3,1424.5) | -0.7<br>(-0.9,-0.6) |
| Sudan                | 321080<br>(302019,342247)       | 1345.2<br>(1271.7,1427.4) | 626552<br>(590494,667391)       | 1344.1<br>(1270.6,1426.3) | -0.1<br>(-0.1,0)    |
| South Asia           | 24215103<br>(22933846,25665257) | 1816.2<br>(1726.2,1916.9) | 34520095<br>(32778221,36440212) | 1818.6<br>(1728.7,1918.9) | 0.1<br>(0,0.2)      |
| Bangladesh           | 2568176<br>(2367860,2789849)    | 1816.9<br>(1686.4,1964.9) | 3002851<br>(2782146,3256958)    | 1821.8<br>(1691.3,1970)   | 0.3<br>(0.2,0.3)    |
| Bhutan               | 14134<br>(13040,15307)          | 1817.5<br>(1687.9,1965.9) | 13822<br>(12833,14980)          | 1817.2<br>(1686.9,1965.4) | 0<br>(-0.1,0.1)     |
| India                | 18586161<br>(17590943,19681101) | 1816.3<br>(1726.5,1914.1) | 25923780<br>(24627632,27343904) | 1818.4<br>(1728.6,1916.3) | 0.1<br>(0.1,0.1)    |

|                                  |                              |                           |                              |                           |                     |
|----------------------------------|------------------------------|---------------------------|------------------------------|---------------------------|---------------------|
| Nepal                            | 442809<br>(408677,480514)    | 1821<br>(1690.6,1969.3)   | 607535<br>(561738,658930)    | 1826<br>(1695.6,1974)     | 0.3<br>(0.2,0.3)    |
| Pakistan                         | 2603823<br>(2463070,2765199) | 1813.2<br>(1723.6,1910.9) | 4972107<br>(4705245,5264199) | 1816.2<br>(1726.2,1914.1) | 0.2<br>(0.1,0.2)    |
| Central Sub-Saharan Africa       | 764947<br>(705735,829396)    | 1080.7<br>(1008.6,1162.4) | 1774712<br>(1638827,1922017) | 1080.8<br>(1008.5,1162.3) | 0<br>(0,0)          |
| Angola                           | 140769<br>(129854,152648)    | 1079.2<br>(1007.1,1160.7) | 420647<br>(387877,456508)    | 1082.8<br>(1010.6,1164.6) | 0.3<br>(0.3,0.4)    |
| Central African Republic         | 37034<br>(34199,40147)       | 1081.3<br>(1009,1162.8)   | 70251<br>(64950,76016)       | 1082.1<br>(1009.7,1163.7) | 0.1<br>(0,0.1)      |
| Congo                            | 33436<br>(30832,36252)       | 1082.4<br>(1010.1,1163.9) | 65702<br>(60892,70967)       | 1080.8<br>(1008.5,1162.4) | -0.1<br>(-0.2,-0.1) |
| Democratic Republic of the Congo | 534722<br>(493430,579990)    | 1080.9<br>(1008.8,1162.6) | 1178868<br>(1088806,1276269) | 1080.1<br>(1007.9,1161.6) | -0.1<br>(-0.1,0)    |
| Equatorial Guinea                | 5956<br>(5496,6462)          | 1083<br>(1010.6,1164.7)   | 18518<br>(17116,20051)       | 1071.6<br>(999.1,1152)    | -1.1<br>(-1.4,-0.7) |
| Gabon                            | 13030<br>(12062,14112)       | 1081.2<br>(1009.2,1162.4) | 20726<br>(19252,22357)       | 1083<br>(1010.8,1164.7)   | 0.2<br>(0.1,0.2)    |
| Eastern Sub-Saharan Africa       | 2587979<br>(2456956,2724332) | 1064.3<br>(1017.6,1114.6) | 5505244<br>(5237541,5781661) | 1082.1<br>(1034.9,1132.1) | 1.7<br>(0.7,2.6)    |
| Burundi                          | 73637<br>(69601,77802)       | 1037.7<br>(988.2,1090.7)  | 155619<br>(147161,164387)    | 1035.9<br>(986.4,1088.8)  | -0.2<br>(-0.2,-0.1) |
| Comoros                          | 6084<br>(5754,6429)          | 1035.8<br>(986.5,1088.6)  | 7968<br>(7573,8387)          | 1035<br>(985.5,1087.9)    | -0.1<br>(-0.1,0)    |
| Djibouti                         | 6295<br>(5956,6652)          | 1028.4<br>(979.1,1080.7)  | 13554<br>(12855,14298)       | 1028<br>(978.9,1080.3)    | 0<br>(-0.1,0)       |
| Eritrea                          | 39803<br>(37611,42072)       | 1035.9<br>(986.6,1088.8)  | 82461<br>(78172,87030)       | 1035.4<br>(986,1088.3)    | 0<br>(-0.1,0)       |
| Ethiopia                         | 605725<br>(573044,639030)    | 909.4<br>(868,953)        | 1252212<br>(1189937,1320835) | 933.2<br>(892.5,978.7)    | 2.6<br>(-0.5,5.8)   |
| Kenya                            | 262540<br>(248995,277007)    | 868.5<br>(830.3,911.7)    | 539623<br>(514115,567668)    | 914.1<br>(875.1,957.4)    | 5.3<br>(2,8.2)      |

|                             |                           |                           |                             |                           |                     |
|-----------------------------|---------------------------|---------------------------|-----------------------------|---------------------------|---------------------|
| Madagascar                  | 156324<br>(147838,165214) | 1035.2<br>(985.7,1088)    | 332992<br>(315368,351622)   | 1035<br>(985.6,1087.8)    | 0<br>(0,0)          |
| Malawi                      | 125191<br>(118372,132293) | 1037.1<br>(987.6,1090.1)  | 238021<br>(225026,251364)   | 1037.8<br>(988.3,1090.9)  | 0.1<br>(0.1,0.1)    |
| Mozambique                  | 171097<br>(161609,180810) | 1038.8<br>(989.6,1092)    | 394352<br>(372898,416819)   | 1038.7<br>(989.3,1091.8)  | 0<br>(-0.1,0)       |
| Rwanda                      | 63676<br>(59319,68995)    | 678.4<br>(635.3,728.2)    | 101051<br>(94262,109080)    | 678.2<br>(635.1,728)      | 0<br>(-0.1,0)       |
| Somalia                     | 95137<br>(89718,100602)   | 1031.9<br>(982.7,1084.5)  | 269461<br>(254551,284809)   | 1034.2<br>(985,1086.9)    | 0.2<br>(0.1,0.3)    |
| United Republic of Tanzania | 480721<br>(456293,508145) | 1466.9<br>(1401.3,1540.3) | 1005852<br>(957871,1053966) | 1446.1<br>(1383.7,1510.7) | -1.4<br>(-4.5,1.6)  |
| Uganda                      | 318351<br>(290455,348284) | 1457.4<br>(1345.5,1582.6) | 754907<br>(688004,826385)   | 1457.5<br>(1345.8,1582.2) | 0<br>(-0.1,0.1)     |
| Zambia                      | 105944<br>(100116,111947) | 1036.4<br>(986.9,1089.2)  | 232435<br>(220089,245574)   | 1036.3<br>(986.8,1089.4)  | 0<br>(-0.1,0)       |
| South Sudan                 | 75554<br>(71510,79809)    | 1029.6<br>(980.2,1082)    | 120335<br>(113708,127116)   | 1033.8<br>(984.6,1086.5)  | 0.4<br>(0.3,0.5)    |
| Southern Sub-Saharan Africa | 674074<br>(637334,712189) | 1084<br>(1028.4,1140.6)   | 880127<br>(833860,927382)   | 1082.5<br>(1026.6,1139.8) | -0.1<br>(-0.2,0)    |
| Botswana                    | 17861<br>(16485,19335)    | 1084.1<br>(1011.8,1165.9) | 26270<br>(24446,28283)      | 1080.9<br>(1008.6,1162.3) | -0.3<br>(-0.4,-0.2) |
| Lesotho                     | 23954<br>(22124,25901)    | 1081.9<br>(1009.6,1163.4) | 24264<br>(22565,26180)      | 1081.2<br>(1009,1162.6)   | -0.1<br>(-0.1,0)    |
| Namibia                     | 18820<br>(17389,20362)    | 1082<br>(1009.7,1163.7)   | 29046<br>(26940,31360)      | 1082.5<br>(1010.2,1164)   | 0.1<br>(0,0.1)      |
| South Africa                | 456318<br>(432902,480883) | 1084.7<br>(1033.3,1138.8) | 591937<br>(564008,621112)   | 1082.5<br>(1031.3,1136.5) | -0.2<br>(-0.3,-0.2) |
| Eswatini                    | 11494<br>(10586,12478)    | 1084.8<br>(1012.4,1166.6) | 14055<br>(13025,15182)      | 1080.8<br>(1008.4,1161.9) | -0.4<br>(-0.5,-0.2) |
| Zimbabwe                    | 145627<br>(134213,157942) | 1081.8<br>(1009.6,1163.6) | 194555<br>(180048,210309)   | 1083.4<br>(1011,1165.2)   | 0.1<br>(0.1,0.2)    |
| Western Sub-                | 2698453                   | 1096.7                    | 6297598                     | 1102.4                    | 0.5                 |

|                       |                              |                           |                              |                           |                     |
|-----------------------|------------------------------|---------------------------|------------------------------|---------------------------|---------------------|
| Saharan Africa        | (2556260,2829311)            | (1047.4,1143.8)           | (5984285,6589760)            | (1054,1148.6)             | (0.2,0.9)           |
| Benin                 | 71974<br>(67874,76071)       | 1099.8<br>(1046.5,1152.6) | 179101<br>(169083,189008)    | 1099.7<br>(1046.4,1152.3) | 0<br>(-0.1,0.1)     |
| Burkina Faso          | 140307<br>(132358,148157)    | 1101.3<br>(1047.8,1154.2) | 320809<br>(302857,338374)    | 1100.5<br>(1047.1,1153.2) | -0.1<br>(-0.1,0)    |
| Cameroon              | 170713<br>(161664,180410)    | 1272<br>(1212.4,1333.8)   | 455123<br>(435478,472936)    | 1283.7<br>(1232.9,1328.3) | 0.9<br>(-2.7,4.7)   |
| Cabo Verde            | 4921<br>(4648,5188)          | 1103.1<br>(1049.3,1155.9) | 6204<br>(5900,6503)          | 1097.9<br>(1044.7,1150.2) | -0.5<br>(-0.6,-0.4) |
| Chad                  | 87479<br>(82557,92346)       | 1101.2<br>(1047.6,1153.8) | 245909<br>(231907,259811)    | 1098.3<br>(1044.8,1150.8) | -0.3<br>(-0.3,-0.2) |
| Côte d'Ivoire         | 174990<br>(165186,184754)    | 1095.7<br>(1042.6,1148)   | 346820<br>(328073,365233)    | 1094.5<br>(1041.4,1146.7) | -0.1<br>(-0.2,-0.1) |
| Gambia                | 14275<br>(13476,15071)       | 1098<br>(1044.7,1150.1)   | 30136<br>(28511,31737)       | 1099.4<br>(1046,1152)     | 0.1<br>(0.1,0.2)    |
| Ghana                 | 168312<br>(159189,177853)    | 873.4<br>(831.5,916.9)    | 312580<br>(296576,329503)    | 874.4<br>(832.6,917.8)    | 0.1<br>(0.1,0.1)    |
| Guinea                | 86688<br>(81875,91426)       | 1099.5<br>(1046.1,1152.2) | 177879<br>(167917,187680)    | 1100.2<br>(1046.7,1152.9) | 0.1<br>(0,0.1)      |
| Guinea-Bissau         | 14482<br>(13667,15282)       | 1100.9<br>(1047.4,1153.7) | 25734<br>(24334,27121)       | 1100.5<br>(1047,1153.2)   | 0<br>(-0.1,0)       |
| Liberia               | 27553<br>(26022,29065)       | 1099.9<br>(1046.6,1152.4) | 62100<br>(58807,65368)       | 1097.1<br>(1043.7,1149.5) | -0.3<br>(-0.3,-0.2) |
| Mali                  | 133067<br>(124078,142583)    | 1183.9<br>(1112.9,1261.3) | 337153<br>(313844,361817)    | 1178.9<br>(1104.8,1259.6) | -0.4<br>(-4.3,3.8)  |
| Mauritania            | 28992<br>(27377,30583)       | 1098.8<br>(1045.4,1151.3) | 53015<br>(50222,55864)       | 1099.1<br>(1045.7,1151.6) | 0<br>(0,0.1)        |
| Niger                 | 119090<br>(112302,125870)    | 1098.9<br>(1045.5,1151.4) | 352968<br>(332813,373044)    | 1098.9<br>(1045.5,1151.3) | 0<br>(0,0)          |
| Nigeria               | 1239249<br>(1173558,1302863) | 1103.6<br>(1051.5,1153.7) | 2976028<br>(2818285,3128822) | 1105.4<br>(1053.7,1155.3) | 0.2<br>(0.1,0.3)    |
| Sao Tome and Principe | 1737<br>(1639,1832)          | 1099<br>(1045.6,1151.7)   | 2563<br>(2430,2695)          | 1098.2<br>(1044.9,1150.6) | -0.1<br>(-0.1,0)    |
| Senegal               | 110556                       | 1100.9                    | 199740                       | 1097                      | -0.4                |



|              |                        |                         |                           |                           |                     |
|--------------|------------------------|-------------------------|---------------------------|---------------------------|---------------------|
|              | (104346,116740)        | (1047.3,1153.6)         | (189039,210326)           | (1043.7,1149.8)           | (-0.4,-0.3)         |
| Sierra Leone | 50261<br>(47498,52990) | 1100.4<br>(1046.9,1153) | 109918<br>(103990,115729) | 1099.1<br>(1045.7,1151.6) | -0.1<br>(-0.2,-0.1) |
| Togo         | 53716<br>(50662,56712) | 1100.5<br>(1047,1153.2) | 103730<br>(98198,109189)  | 1099.4<br>(1046.1,1152.3) | -0.1<br>(-0.1,0)    |

AD, Atopic dermatitis; SDI, socio-demographic index. 95% UI=95% uncertainty interval.

**Table S7.** Disability-adjusted-life-years due to atopic dermatitis in 1990 and 2019 for both sexes and percentage change in age-standardized rates by location.

| DALYs of AD                           | 1990                         |                       | 2019                          |                       | Percentage change in age-standardized rates between 1990 and 2019 |
|---------------------------------------|------------------------------|-----------------------|-------------------------------|-----------------------|-------------------------------------------------------------------|
|                                       | Counts(95% UI)               | Rate(95% UI)          | Counts(95% UI)                | Rate(95% UI)          |                                                                   |
| Global                                | 5827142<br>(3089709,9784389) | 104<br>(55.3,174.6)   | 7480085<br>(3986821,12581232) | 99.7<br>(53.1,167.4)  | -4.1<br>(-4.8,-3.5)                                               |
| High SDI                              | 1158917<br>(618496,1945587)  | 161.8<br>(86.7,272.5) | 1240409<br>(663020,2080100)   | 155.5<br>(83.5,262)   | -3.8<br>(-4.7,-2.9)                                               |
| High-middle SDI                       | 1301514<br>(690908,2189633)  | 115.4<br>(61.3,194)   | 1498845<br>(801392,2510050)   | 120.4<br>(63.8,202.2) | 4.4<br>(3.3,5.6)                                                  |
| Low SDI                               | 406387<br>(220018,678934)    | 60.7<br>(32.7,101.7)  | 829148<br>(444490,1384307)    | 59.7<br>(32,100.1)    | -1.7<br>(-3,-0.3)                                                 |
| Low-middle SDI                        | 1118228<br>(597440,1860639)  | 85.5<br>(45.7,142.5)  | 1529171<br>(819894,2548717)   | 83.6<br>(44.8,139.8)  | -2.2<br>(-3.4,-1)                                                 |
| Middle SDI                            | 1838886<br>(976566,3084347)  | 103.9<br>(55.5,173.6) | 2377976<br>(1262654,3996298)  | 102.3<br>(54.3,171.7) | -1.6<br>(-2.7,-0.5)                                               |
| East Asia                             | 1294973<br>(692991,2172716)  | 107<br>(57.2,179)     | 1608174<br>(861025,2679567)   | 108.4<br>(58.3,180.1) | 1.4<br>(-1.0,3.8)                                                 |
| China                                 | 1239092<br>(662797,2079102)  | 106<br>(56.6,177)     | 1539727<br>(824236,2559834)   | 107.5<br>(57.8,178.1) | 1.4<br>(-1.0,4.0)                                                 |
| Democratic People's Republic of Korea | 26043<br>(14004,44036)       | 125.5<br>(67.5,211.2) | 32326<br>(17516,54145)        | 123<br>(67,205.8)     | -1.9<br>(-5.9,2.1)                                                |
| Taiwan (Province of China)            | 29838<br>(15772,50276)       | 146.6<br>(78,246.8)   | 36122<br>(19143,61063)        | 150.6<br>(80.3,253.1) | 2.7<br>(-2.1,7.7)                                                 |
| Southeast Asia                        | 695628<br>(368703,1173876)   | 149<br>(79.6,249.8)   | 1006056<br>(539808,1689425)   | 149.1<br>(79.9,250.5) | 0.1<br>(-1.3,1.4)                                                 |
| Cambodia                              | 14837<br>(7970,25038)        | 144.4<br>(78,241.6)   | 23658<br>(12546,39702)        | 142<br>(75.7,238.5)   | -1.7<br>(-5.4,2.3)                                                |
| Indonesia                             | 297622<br>(158489,497896)    | 160.7<br>(86.1,267.5) | 420929<br>(225158,706454)     | 162<br>(86.7,271.7)   | 0.8<br>(-1.7,3.3)                                                 |
| Lao People's Democratic Republic      | 5885<br>(3128,9953)          | 142.7<br>(75.7,240.1) | 10128<br>(5418,17115)         | 141.2<br>(75.7,237.1) | -1<br>(-4.7,2.8)                                                  |

|                                  |                         |                       |                          |                       |                    |
|----------------------------------|-------------------------|-----------------------|--------------------------|-----------------------|--------------------|
| Malaysia                         | 24960<br>(13431,41909)  | 140.9<br>(75.6,236)   | 43806<br>(23537,74206)   | 139.6<br>(75.3,235.8) | -1<br>(-4.8,2.8)   |
| Maldives                         | 310<br>(167,522)        | 139.3<br>(74.9,234.8) | 644<br>(345,1082)        | 131<br>(69.8,218.1)   | -6<br>(-9.6,-2.3)  |
| Myanmar                          | 57968<br>(30806,97910)  | 141.3<br>(75.4,237.9) | 78183<br>(42080,131860)  | 143.1<br>(77,241.2)   | 1.2<br>(-2.8,5)    |
| Philippines                      | 89462<br>(47341,150604) | 141.5<br>(75.8,237.9) | 158455<br>(84475,266456) | 141.4<br>(75.8,237.5) | -0.1<br>(-0.9,0.8) |
| Sri Lanka                        | 21925<br>(11790,36810)  | 126.6<br>(68.3,212.4) | 27646<br>(14897,46398)   | 127.1<br>(68.4,213)   | 0.4<br>(-4.2,5)    |
| Thailand                         | 81052<br>(43239,137212) | 142.1<br>(75.9,239.8) | 99794<br>(53985,167440)  | 142.5<br>(76.8,239.3) | 0.3<br>(-3.4,4.3)  |
| Timor-Leste                      | 1087<br>(585,1825)      | 139.2<br>(75.5,235.8) | 1873<br>(1009,3147)      | 141<br>(75.9,236.8)   | 1.3<br>(-2.7,5.1)  |
| Viet Nam                         | 97937<br>(51526,164623) | 144<br>(76.4,242)     | 137692<br>(73697,229115) | 142.1<br>(76.1,235.7) | -1.3<br>(-5.2,2.6) |
| Mauritius                        | 1555<br>(832,2626)      | 140.8<br>(75.4,237.4) | 1791<br>(964,3006)       | 140.6<br>(75.9,235.5) | -0.1<br>(-4.3,6)   |
| Seychelles                       | 103<br>(56,174)         | 141<br>(76,237.5)     | 140<br>(75,233)          | 137.6<br>(73.7,228.7) | -2.4<br>(-6,1.6)   |
| Oceania                          | 8603<br>(4576,14452)    | 131.8<br>(70.2,221.2) | 17608<br>(9331,29741)    | 132<br>(70.4,222.4)   | 0.1<br>(-2.8,2.9)  |
| Fiji                             | 1020<br>(541,1731)      | 132.9<br>(70.6,224.1) | 1207<br>(644,2022)       | 132.3<br>(70.4,221.2) | -0.5<br>(-4.2,3.6) |
| Kiribati                         | 100<br>(54,166)         | 133.8<br>(72.6,222.5) | 160<br>(86,268)          | 134.2<br>(72.4,224.2) | 0.3<br>(-3.9,4)    |
| Marshall Islands                 | 62<br>(33,105)          | 132.2<br>(70.1,221.6) | 75<br>(40,127)           | 131.9<br>(70.2,222.3) | -0.2<br>(-4.2,3.6) |
| Micronesia (Federated States of) | 140<br>(75,234)         | 132.5<br>(70.9,222.4) | 135<br>(72,229)          | 132.5<br>(70.7,224.3) | 0<br>(-3.6,4)      |
| Papua New Guinea                 | 5415<br>(2891,9044)     | 131.4<br>(70.2,220.4) | 13070<br>(6918,22089)    | 131.7<br>(70.1,221.9) | 0.2<br>(-3.7,4.1)  |
| Samoa                            | 220<br>(118,369)        | 132.3<br>(70.6,220.8) | 283<br>(148,476)         | 132.6<br>(69.8,222.1) | 0.2<br>(-3.6,4)    |

|                          |                          |                        |                           |                        |                    |
|--------------------------|--------------------------|------------------------|---------------------------|------------------------|--------------------|
| Solomon Islands          | 455<br>(242,767)         | 132.2<br>(70.5,223.4)  | 877<br>(467,1474)         | 133<br>(71.4,223.5)    | 0.6<br>(-3.1,4.6)  |
| Tonga                    | 131<br>(69,219)          | 134.5<br>(71.9,224.5)  | 138<br>(74,232)           | 134.7<br>(72.8,225.8)  | 0.1<br>(-3.8,4.1)  |
| Vanuatu                  | 204<br>(108,343)         | 132.6<br>(70.5,223.8)  | 397<br>(213,661)          | 133.2<br>(71.3,222.8)  | 0.5<br>(-3.1,4.7)  |
| American Samoa           | 65<br>(34,108)           | 132.8<br>(69.4,221.8)  | 74<br>(39,124)            | 133.2<br>(70.8,223.5)  | 0.3<br>(-3.6,4.1)  |
| Cook Islands             | 25<br>(13,42)            | 132.5<br>(70.6,221.5)  | 24<br>(13,41)             | 135.3<br>(73.4,227.8)  | 2.1<br>(-2.1,6.3)  |
| Guam                     | 178<br>(95,301)          | 131<br>(69.8,220.3)    | 225<br>(120,378)          | 132.2<br>(70.4,222.3)  | 0.9<br>(-3,5)      |
| Nauru                    | 14<br>(7,23)             | 132.6<br>(70,224)      | 14<br>(7,24)              | 133.7<br>(70.1,224.6)  | 0.8<br>(-3.1,4.9)  |
| Niue                     | 3<br>(2,5)               | 133.1<br>(70.4,222.8)  | 2<br>(1,4)                | 132.8<br>(71,223.1)    | -0.2<br>(-4.2,3.4) |
| Northern Mariana Islands | 59<br>(31,100)           | 131.1<br>(70.4,220.5)  | 55<br>(30,93)             | 132<br>(71.1,223)      | 0.7<br>(-3.1,5.1)  |
| Palau                    | 20<br>(11,34)            | 132.4<br>(71.1,223.6)  | 23<br>(12,38)             | 128.1<br>(68.6,213.8)  | -3.2<br>(-7.1,0.8) |
| Tokelau                  | 2<br>(1,4)               | 134.6<br>(72.5,225.1)  | 2<br>(1,3)                | 132.7<br>(71,222.4)    | -1.4<br>(-5.2,2.6) |
| Tuvalu                   | 13<br>(7,22)             | 136.6<br>(73.3,230.6)  | 16<br>(8,26)              | 131.6<br>(69.8,219.4)  | -3.6<br>(-7.4,0.4) |
| Central Asia             | 169827<br>(91806,284369) | 208.2<br>(111.9,349.5) | 196199<br>(104387,329284) | 207.2<br>(110.3,347.2) | -0.5<br>(-1.9,1)   |
| Armenia                  | 7495<br>(3964,12707)     | 208<br>(110.5,352.4)   | 5074<br>(2706,8560)       | 206.4<br>(110.2,348.3) | -0.8<br>(-4.1,2.6) |
| Azerbaijan               | 17118<br>(9192,28960)    | 208.3<br>(111.5,352.3) | 18527<br>(9857,31338)     | 205.9<br>(109.4,349)   | -1.2<br>(-4.3,2.5) |
| Georgia                  | 10661<br>(5773,17723)    | 208.9<br>(112.7,347.8) | 6015<br>(3232,10195)      | 204.4<br>(109,345.6)   | -2.1<br>(-8.2,4)   |
| Kazakhstan               | 36693<br>(19498,61232)   | 208.3<br>(111,347.3)   | 37548<br>(20015,62907)    | 208.3<br>(110.8,348.6) | 0<br>(-3.4,3.4)    |

|                           |                         |                        |                         |                        |                     |
|---------------------------|-------------------------|------------------------|-------------------------|------------------------|---------------------|
| Kyrgyzstan                | 11236<br>(6051,19177)   | 208.5<br>(111.9,350.5) | 14801<br>(7836,24908)   | 208<br>(110.3,349.9)   | -0.3<br>(-3.5,3.3)  |
| Mongolia                  | 5823<br>(3139,9962)     | 207.7<br>(111.4,355.5) | 7313<br>(3872,12243)    | 208.6<br>(111.2,347.8) | 0.4<br>(-2.6,4.1)   |
| Tajikistan                | 14938<br>(8002,25029)   | 208.2<br>(112.5,345)   | 22421<br>(12001,37838)  | 207.1<br>(110.8,349.3) | -0.5<br>(-3.7,2.9)  |
| Turkmenistan              | 9857<br>(5215,16573)    | 208.6<br>(111.3,347.9) | 10874<br>(5779,18391)   | 206.6<br>(110.2,348.2) | -1<br>(-4.4,2.4)    |
| Uzbekistan                | 56005<br>(30295,95071)  | 207.8<br>(112.6,351.9) | 73627<br>(39323,123850) | 206.9<br>(110.7,348.1) | -0.4<br>(-4,3)      |
| Central Europe            | 90851<br>(48749,153200) | 84.4<br>(45.4,142)     | 66859<br>(35722,113307) | 84<br>(44.7,142.7)     | -0.5<br>(-2,1.1)    |
| Albania                   | 3249<br>(1761,5461)     | 87.3<br>(47.5,146.3)   | 1800<br>(970,3035)      | 87.7<br>(47,148.4)     | 0.4<br>(-4.5,6)     |
| Bosnia and<br>Herzegovina | 3607<br>(1957,6083)     | 87.5<br>(47.4,147.6)   | 1962<br>(1065,3263)     | 87.6<br>(47,146.3)     | 0.1<br>(-4.6,5.2)   |
| Bulgaria                  | 6070<br>(3221,10332)    | 87.7<br>(46.4,149.1)   | 4050<br>(2159,6832)     | 87.6<br>(46.6,147.1)   | -0.1<br>(-5.6,5.6)  |
| Croatia                   | 3447<br>(1844,5772)     | 87.7<br>(46.3,146.4)   | 2494<br>(1332,4193)     | 87.7<br>(47,147.2)     | -0.1<br>(-5.2,5.5)  |
| Czechia                   | 7372<br>(3981,12393)    | 87.7<br>(47,147.4)     | 6560<br>(3478,11138)    | 87.5<br>(46.3,150.6)   | -0.2<br>(-4.8,4.8)  |
| Hungary                   | 9951<br>(5344,16871)    | 119.8<br>(64.3,203.9)  | 7864<br>(4222,13289)    | 120<br>(64.5,204.1)    | 0.2<br>(-4.1,4.6)   |
| North Macedonia           | 1682<br>(902,2840)      | 87.5<br>(46.9,147.7)   | 1350<br>(732,2254)      | 87.5<br>(47.3,147.4)   | -0.1<br>(-5.4,5.3)  |
| Montenegro                | 515<br>(276,863)        | 87.7<br>(46.8,146.9)   | 407<br>(220,681)        | 87.7<br>(47,146.5)     | 0<br>(-5.1,5.2)     |
| Poland                    | 29644<br>(15776,49700)  | 85.7<br>(45.7,143.6)   | 21943<br>(11771,36796)  | 81.9<br>(43.9,137.8)   | -4.4<br>(-7.2,-1.5) |
| Romania                   | 12697<br>(6743,21132)   | 61.3<br>(32.5,102.3)   | 8245<br>(4364,13791)    | 61.9<br>(32.6,104.3)   | 1<br>(-6,7.6)       |
| Serbia                    | 6992<br>(3799,11656)    | 87.8<br>(47.4,146.3)   | 5584<br>(3015,9361)     | 87.7<br>(47,148.2)     | -0.2<br>(-5,5.1)    |

|                             |                           |                        |                           |                        |                    |
|-----------------------------|---------------------------|------------------------|---------------------------|------------------------|--------------------|
| Slovakia                    | 4207<br>(2253,7099)       | 87.8<br>(47.2,148.5)   | 3355<br>(1799,5570)       | 87.7<br>(46.9,147.6)   | -0.1<br>(-5.3,5.2) |
| Slovenia                    | 1417<br>(759,2403)        | 87.8<br>(46.9,148.9)   | 1245<br>(677,2107)        | 87.5<br>(47.1,148.7)   | -0.4<br>(-6.5,7)   |
| Eastern Europe              | 265747<br>(141772,448391) | 135.3<br>(72.3,228.6)  | 212788<br>(113396,360336) | 137.7<br>(73.1,233.3)  | 1.8<br>(0.3,3.2)   |
| Belarus                     | 8535<br>(4521,14337)      | 92.8<br>(49.1,156.7)   | 6475<br>(3508,10908)      | 92.6<br>(49.5,156.7)   | -0.2<br>(-5.1,4.6) |
| Estonia                     | 2873<br>(1548,4841)       | 213.1<br>(114.9,358.1) | 1966<br>(1052,3306)       | 212.9<br>(113.2,360)   | -0.1<br>(-3.3,3.1) |
| Latvia                      | 1339<br>(714,2254)        | 60<br>(32,101.3)       | 787<br>(424,1363)         | 60<br>(32.2,103.6)     | -0.1<br>(-7.2,7.1) |
| Lithuania                   | 2960<br>(1593,4939)       | 92.9<br>(49.8,154.7)   | 1767<br>(960,2981)        | 92.7<br>(49.8,157.9)   | -0.2<br>(-5.3,4.6) |
| Republic of Moldova         | 4067<br>(2189,6808)       | 92.7<br>(49.8,155.1)   | 2340<br>(1255,3900)       | 92.5<br>(49.2,154.9)   | -0.2<br>(-5.2,5.1) |
| Russian Federation          | 203894<br>(108935,344705) | 154.3<br>(82.3,261.2)  | 170675<br>(90555,288247)  | 153.7<br>(81.7,259.9)  | -0.4<br>(-1.9,1)   |
| Ukraine                     | 42079<br>(22668,70862)    | 95.4<br>(51.4,160.8)   | 28778<br>(15661,48852)    | 95.2<br>(51.3,162.1)   | -0.2<br>(-5.5,5.2) |
| High-income Asia<br>Pacific | 316556<br>(169574,530442) | 216.4<br>(115.7,361.7) | 277889<br>(151340,465932) | 216.2<br>(116.3,365.2) | -0.1<br>(-2.8,2.5) |
| Brunei Darussalam           | 521<br>(274,887)          | 176.4<br>(93.5,298.6)  | 671<br>(355,1133)         | 177.1<br>(94,298.5)    | 0.4<br>(-3.2,4.1)  |
| Japan                       | 237194<br>(127300,397149) | 235.9<br>(126.7,396.5) | 205111<br>(110879,342695) | 236.1<br>(126.3,396.9) | 0.1<br>(-3.3,3.1)  |
| Republic of Korea           | 74653<br>(39602,124552)   | 177.1<br>(93.7,295.7)  | 65736<br>(35568,111406)   | 178.8<br>(96.7,302.5)  | 1<br>(-4.1,6.6)    |
| Singapore                   | 4189<br>(2243,7078)       | 160.8<br>(85.9,272.3)  | 6371<br>(3427,10742)      | 159.8<br>(86.4,270.3)  | -0.6<br>(-6.4,5.9) |
| Australasia                 | 21020<br>(11410,36091)    | 116.8<br>(63.4,200.4)  | 27547<br>(14760,46221)    | 116.6<br>(62.4,197)    | -0.1<br>(-4.9,5)   |
| Australia                   | 16486<br>(8939,28609)     | 110.5<br>(59.8,190.9)  | 21980<br>(11767,37024)    | 110.5<br>(59,187)      | -0.1<br>(-5.8,6.5) |

|                |                           |                        |                           |                        |                    |
|----------------|---------------------------|------------------------|---------------------------|------------------------|--------------------|
| New Zealand    | 4534<br>(2471,7571)       | 146.8<br>(79.8,244.8)  | 5566<br>(2984,9291)       | 149.2<br>(79.7,250.3)  | 1.6<br>(-3,6.4)    |
| Western Europe | 557123<br>(300143,937435) | 178.4<br>(96.1,301.2)  | 589199<br>(315986,990299) | 178.8<br>(96.1,302.1)  | 0.2<br>(-1,1.4)    |
| Andorra        | 69<br>(37,115)            | 162.7<br>(87.3,271.7)  | 93<br>(50,158)            | 163.7<br>(87.3,275.6)  | 0.6<br>(-3.2,4.4)  |
| Austria        | 10184<br>(5450,17113)     | 164<br>(87.8,277.9)    | 10721<br>(5797,17948)     | 163.6<br>(87.9,273.9)  | -0.3<br>(-3.6,3.2) |
| Belgium        | 13170<br>(7022,21935)     | 164<br>(87.9,274)      | 14575<br>(7780,24361)     | 164<br>(87.3,273.3)    | 0<br>(-3.6,3.9)    |
| Cyprus         | 1123<br>(606,1878)        | 154.1<br>(82.9,259.2)  | 1533<br>(823,2608)        | 153.9<br>(83.4,265.1)  | -0.1<br>(-6.1,5.7) |
| Denmark        | 8137<br>(4362,13841)      | 200.8<br>(106.9,340)   | 9139<br>(4827,15408)      | 204.2<br>(107.5,344.4) | 1.7<br>(-4.1,7.7)  |
| Finland        | 6730<br>(3610,11219)      | 164<br>(88.2,274.8)    | 6883<br>(3684,11492)      | 163.9<br>(86.6,276.3)  | -0.1<br>(-3.7,3.8) |
| France         | 111086<br>(59297,185490)  | 224.5<br>(119.3,376.4) | 119035<br>(63457,199651)  | 224.5<br>(118.4,380.8) | 0<br>(-3.2,3.3)    |
| Germany        | 97277<br>(52205,163070)   | 158.5<br>(86,266.7)    | 98027<br>(52612,162850)   | 160<br>(84.8,268.1)    | 1<br>(-3.9,5.9)    |
| Greece         | 10979<br>(5888,18816)     | 129.6<br>(69.3,222.8)  | 9663<br>(5224,16391)      | 130.6<br>(70.7,223.7)  | 0.7<br>(-4.9,7)    |
| Iceland        | 445<br>(236,755)          | 187.2<br>(99.5,318)    | 530<br>(283,893)          | 186.1<br>(98.5,315.5)  | -0.5<br>(-6.3,5.4) |
| Ireland        | 5766<br>(3120,9731)       | 164<br>(88.6,276.9)    | 6827<br>(3706,11528)      | 164.2<br>(88.9,276.3)  | 0.1<br>(-3.7,4)    |
| Israel         | 8556<br>(4586,14247)      | 164.5<br>(88.1,274)    | 15135<br>(8103,25390)     | 164.2<br>(87.7,275.4)  | -0.2<br>(-4.3,3.8) |
| Italy          | 82648<br>(43968,138887)   | 189<br>(100.3,320.4)   | 80465<br>(43514,134478)   | 188.9<br>(100.4,320.2) | -0.1<br>(-1.2,1)   |
| Luxembourg     | 493<br>(266,828)          | 164.1<br>(88,275.8)    | 766<br>(407,1289)         | 163.7<br>(86.8,274.5)  | -0.2<br>(-3.7,3.5) |
| Malta          | 547<br>(293,918)          | 163.8<br>(88.2,275.9)  | 526<br>(283,879)          | 163.5<br>(88.4,274.8)  | -0.2<br>(-3.9,3.6) |

|                           |                           |                        |                           |                       |                     |
|---------------------------|---------------------------|------------------------|---------------------------|-----------------------|---------------------|
| Netherlands               | 19942<br>(10665,33507)    | 164.3<br>(87.3,274.7)  | 21417<br>(11540,35776)    | 164.2<br>(88.4,274.4) | 0<br>(-3.7,3.7)     |
| Norway                    | 6392<br>(3456,10687)      | 182.9<br>(98.5,307.4)  | 7739<br>(4147,12956)      | 183.9<br>(97.8,309)   | 0.6<br>(-2.9,4.5)   |
| Portugal                  | 14098<br>(7626,23715)     | 164.1<br>(89.2,274.7)  | 12375<br>(6655,20762)     | 164.3<br>(88.1,276.5) | 0.1<br>(-3.8,4)     |
| Spain                     | 48151<br>(26039,81579)    | 149.3<br>(80.8,256)    | 49809<br>(27084,84481)    | 149.2<br>(80.5,252.7) | -0.1<br>(-3.8,4.1)  |
| Sweden                    | 11445<br>(6184,19105)     | 165.6<br>(88.9,278)    | 13438<br>(7244,22500)     | 165.4<br>(89.2,276.6) | -0.1<br>(-3.1,3.1)  |
| Switzerland               | 8800<br>(4738,14741)      | 163.6<br>(88.2,274.4)  | 10678<br>(5714,17926)     | 163.8<br>(87.5,276.3) | 0.1<br>(-3.4,3.9)   |
| United Kingdom            | 90554<br>(48914,150955)   | 191.5<br>(102.4,319.6) | 99226<br>(53429,165874)   | 187.3<br>(100.4,314)  | -2.2<br>(-4.5,0.5)  |
| Monaco                    | 34<br>(18,57)             | 164<br>(87.9,275.6)    | 44<br>(24,73)             | 164.6<br>(87.9,278.1) | 0.4<br>(-3.3,3.9)   |
| San Marino                | 32<br>(17,54)             | 164.4<br>(87.9,279.1)  | 42<br>(22,70)             | 164.8<br>(87.4,276.9) | 0.2<br>(-3.2,4.1)   |
| Southern Latin America    | 68794<br>(37079,116092)   | 134.8<br>(72.7,227.6)  | 80109<br>(43486,134797)   | 134.6<br>(73.4,227.3) | -0.2<br>(-3.4,3.1)  |
| Argentina                 | 46206<br>(24969,77739)    | 134.8<br>(72.7,226.6)  | 55414<br>(29951,93129)    | 134.7<br>(73.1,226.2) | -0.1<br>(-4.2,4.4)  |
| Chile                     | 18545<br>(9837,31229)     | 135<br>(71.4,226.7)    | 20704<br>(11128,34851)    | 134.4<br>(72.3,227.5) | -0.4<br>(-4.3,3.6)  |
| Uruguay                   | 4040<br>(2189,6810)       | 134.7<br>(73.1,226.9)  | 3987<br>(2130,6730)       | 134.7<br>(72.2,226.7) | 0<br>(-4.4,4)       |
| High-income North America | 345923<br>(185494,579462) | 138.3<br>(74.3,232)    | 396747<br>(213205,660857) | 132.5<br>(70.6,222.3) | -4.2<br>(-5.4,-3.1) |
| Canada                    | 20862<br>(11195,34915)    | 87.6<br>(46.7,146.5)   | 25819<br>(13822,43286)    | 87.5<br>(46.7,147.9)  | -0.1<br>(-4.9,5.2)  |
| United States of America  | 325007<br>(174550,544636) | 143.6<br>(77.1,241)    | 370880<br>(199067,617823) | 137.2<br>(73.2,230.2) | -4.5<br>(-5.7,-3.4) |
| Greenland                 | 46<br>(24,77)             | 86.2<br>(46.1,144.5)   | 42<br>(22,72)             | 86.9<br>(46,148.5)    | 0.7<br>(-4.1,6.2)   |



|                                     |                        |                      |                        |                      |                    |
|-------------------------------------|------------------------|----------------------|------------------------|----------------------|--------------------|
| Caribbean                           | 32249<br>(17349,53726) | 85<br>(45.8,141.5)   | 37557<br>(20157,62943) | 84.8<br>(45.7,142)   | -0.2<br>(-2.6,2.2) |
| Antigua and Barbuda                 | 54<br>(30,91)          | 85.3<br>(46.6,143.6) | 63<br>(34,105)         | 85.1<br>(46.1,140.9) | -0.2<br>(-5.9,4.8) |
| Bahamas                             | 232<br>(126,393)       | 85.3<br>(46.3,144.9) | 281<br>(151,478)       | 85.3<br>(45.6,144.2) | -0.1<br>(-5.4,5.6) |
| Barbados                            | 204<br>(110,347)       | 85.2<br>(46,144.6)   | 201<br>(107,340)       | 85.1<br>(45.5,143.9) | -0.1<br>(-5.2,5.2) |
| Belize                              | 200<br>(108,337)       | 84.9<br>(45.5,143.8) | 360<br>(194,607)       | 85<br>(45.8,142.8)   | 0.1<br>(-5.2,5.8)  |
| Cuba                                | 8569<br>(4602,14406)   | 85<br>(45.7,143.1)   | 7527<br>(4096,12543)   | 84.8<br>(46.3,141.4) | -0.2<br>(-5.4,5.3) |
| Dominica                            | 68<br>(37,115)         | 85<br>(46,142.7)     | 51<br>(27,86)          | 84.9<br>(45.4,142.8) | -0.2<br>(-5,5.4)   |
| Dominican Republic                  | 7178<br>(3838,12120)   | 85.2<br>(45.7,143.3) | 9236<br>(4944,15539)   | 85.1<br>(45.7,143.2) | -0.1<br>(-5.1,5.2) |
| Grenada                             | 85<br>(46,142)         | 85<br>(46,143)       | 78<br>(42,130)         | 84.7<br>(46.1,141.9) | -0.3<br>(-5.3,5.4) |
| Guyana                              | 751<br>(401,1273)      | 84.6<br>(45.5,142.8) | 644<br>(348,1082)      | 84.6<br>(45.7,141.3) | 0.1<br>(-4.9,5.3)  |
| Haiti                               | 6618<br>(3585,11078)   | 84.6<br>(45.8,141.2) | 11583<br>(6210,19454)  | 84.5<br>(45.5,141.6) | -0.2<br>(-5,5)     |
| Jamaica                             | 2274<br>(1232,3848)    | 85.3<br>(46.1,144.3) | 2147<br>(1154,3642)    | 85<br>(46,144.2)     | -0.4<br>(-5.4,5)   |
| Saint Lucia                         | 137<br>(74,231)        | 85.1<br>(45.9,143)   | 122<br>(66,207)        | 85<br>(46.1,143.6)   | -0.1<br>(-5.5,5.1) |
| Saint Vincent and the<br>Grenadines | 110<br>(59,184)        | 85<br>(46,142)       | 86<br>(46,144)         | 84.8<br>(45.3,142.5) | -0.3<br>(-5.5,4.9) |
| Suriname                            | 363<br>(196,601)       | 84.9<br>(45.9,140.9) | 463<br>(251,784)       | 84.8<br>(46,142.7)   | -0.1<br>(-5.4,5.6) |
| Trinidad and Tobago                 | 1127<br>(613,1886)     | 85.1<br>(46.3,142.3) | 992<br>(535,1666)      | 84.9<br>(45.8,143.4) | -0.2<br>(-5.5,5)   |
| Bermuda                             | 44<br>(23,73)          | 85.4<br>(45.8,143.8) | 40<br>(21,68)          | 85.4<br>(45.4,145.4) | 0<br>(-4.8,4.9)    |

|                                    |                          |                      |                          |                      |                    |
|------------------------------------|--------------------------|----------------------|--------------------------|----------------------|--------------------|
| Puerto Rico                        | 3031<br>(1646,5109)      | 85.2<br>(46.3,144.2) | 2293<br>(1232,3823)      | 85.2<br>(45.4,142.4) | 0<br>(-5.3,5.7)    |
| Saint Kitts and Nevis              | 39<br>(21,66)            | 85.1<br>(45.5,143.7) | 43<br>(23,72)            | 85.1<br>(45.7,144.3) | 0.1<br>(-5,5.4)    |
| United States Virgin Islands       | 92<br>(50,157)           | 85.4<br>(46.2,145.1) | 74<br>(40,124)           | 85.3<br>(45.8,143.1) | -0.1<br>(-5.4,5.6) |
| Andean Latin America               | 37232<br>(20103,62863)   | 82.2<br>(44.5,138)   | 52923<br>(28045,88654)   | 82.9<br>(43.9,138.6) | 0.8<br>(-2.6,4.6)  |
| Bolivia (Plurinational State of)   | 6660<br>(3625,11251)     | 84.2<br>(45.9,140.9) | 10913<br>(5934,18407)    | 84.4<br>(45.7,142.1) | 0.1<br>(-4.7,5.7)  |
| Ecuador                            | 10909<br>(5845,18461)    | 92.3<br>(49.6,154.7) | 16452<br>(8721,27630)    | 92.7<br>(49.1,155.4) | 0.4<br>(-5.5,6.8)  |
| Peru                               | 19663<br>(10574,33203)   | 77<br>(41.5,129.5)   | 25557<br>(13785,42899)   | 77.1<br>(41.5,129.5) | 0.2<br>(-5.1,6.4)  |
| Central Latin America              | 126032<br>(68155,212063) | 64.1<br>(34.7,108.2) | 154576<br>(84151,260390) | 64.1<br>(35,108.3)   | 0<br>(-1.5,1.7)    |
| Colombia                           | 23776<br>(12773,40602)   | 63.8<br>(34.4,109.4) | 27669<br>(14793,46188)   | 63.8<br>(34.5,106.1) | 0<br>(-5.6,6.1)    |
| Costa Rica                         | 2258<br>(1214,3837)      | 63.9<br>(34.3,108.1) | 2701<br>(1437,4631)      | 64<br>(34.3,109.5)   | 0.1<br>(-5.6,6.2)  |
| El Salvador                        | 4060<br>(2176,6766)      | 63.6<br>(34.3,106)   | 3971<br>(2154,6673)      | 63.9<br>(34.7,107.3) | 0.5<br>(-5.7,6.5)  |
| Guatemala                          | 6568<br>(3539,11000)     | 63.4<br>(34.2,105.6) | 12406<br>(6714,20810)    | 63.7<br>(34.6,107.3) | 0.5<br>(-5.6,6.5)  |
| Honduras                           | 3970<br>(2120,6730)      | 63.7<br>(34,107.8)   | 6924<br>(3703,11695)     | 63.8<br>(34.1,107.6) | 0.1<br>(-5.8,6.3)  |
| Mexico                             | 66307<br>(35752,111003)  | 64.4<br>(34.7,108.3) | 77163<br>(41776,129345)  | 64.5<br>(34.9,108)   | 0<br>(-1.4,1.6)    |
| Nicaragua                          | 3300<br>(1768,5575)      | 63.7<br>(34.1,107)   | 4376<br>(2364,7356)      | 63.9<br>(34.5,107.4) | 0.3<br>(-5.8,6.1)  |
| Panama                             | 1718<br>(918,2868)       | 63.7<br>(34.2,106.6) | 2620<br>(1436,4389)      | 63.9<br>(35,107)     | 0.2<br>(-5.2,6.4)  |
| Venezuela (Bolivarian Republic of) | 14073<br>(7612,23433)    | 63.8<br>(34.4,106.4) | 16745<br>(9045,28190)    | 63.8<br>(34.3,107.4) | 0.1<br>(-5.8,6.5)  |

|                              |                           |                       |                           |                       |                     |
|------------------------------|---------------------------|-----------------------|---------------------------|-----------------------|---------------------|
| Tropical Latin America       | 176414<br>(94483,295332)  | 103.7<br>(55.9,173.5) | 209058<br>(112004,349236) | 103.8<br>(55.4,173.4) | 0.1<br>(-2.9,2.7)   |
| Brazil                       | 171242<br>(91690,286882)  | 103.6<br>(55.8,173.5) | 201682<br>(108006,336470) | 103.7<br>(55.4,173)   | 0<br>(-3,2.9)       |
| Paraguay                     | 5172<br>(2753,8672)       | 106<br>(57.5,177.8)   | 7376<br>(3945,12498)      | 106<br>(56.7,179.4)   | 0<br>(-4.7,4.8)     |
| North Africa and Middle East | 258486<br>(138378,433513) | 64.3<br>(34.4,108)    | 384720<br>(207542,647825) | 61.3<br>(33,103.2)    | -4.7<br>(-6.5,-2.6) |
| Algeria                      | 17711<br>(9444,29394)     | 59.2<br>(31.5,98.5)   | 25165<br>(13369,41875)    | 59.2<br>(31.5,98.7)   | -0.1<br>(-6,6.4)    |
| Bahrain                      | 329<br>(174,556)          | 58.4<br>(30.8,98.8)   | 741<br>(402,1266)         | 58.2<br>(31.5,98.9)   | -0.3<br>(-6.7,6.6)  |
| Egypt                        | 25257<br>(13585,42848)    | 39<br>(20.8,66.2)     | 40283<br>(21785,68494)    | 37.7<br>(20.4,64.2)   | -3.4<br>(-11.4,5.2) |
| Iran (Islamic Republic of)   | 42392<br>(22655,70758)    | 59.5<br>(31.8,100)    | 49008<br>(26429,82662)    | 60<br>(32.4,101.6)    | 0.8<br>(-2.9,4.3)   |
| Iraq                         | 12571<br>(6733,21096)     | 58.7<br>(31.5,98.3)   | 27031<br>(14398,46179)    | 58.9<br>(31.4,100.8)  | 0.3<br>(-5.6,6.7)   |
| Jordan                       | 2692<br>(1468,4555)       | 59<br>(32,99.7)       | 7341<br>(3922,12521)      | 58.8<br>(31.4,100.2)  | -0.4<br>(-6.6,5.9)  |
| Kuwait                       | 1144<br>(610,1906)        | 58.5<br>(31.1,97.4)   | 2482<br>(1328,4189)       | 59<br>(31.7,100)      | 0.8<br>(-4.9,6.9)   |
| Lebanon                      | 2145<br>(1155,3591)       | 59<br>(31.7,98.6)     | 3033<br>(1644,5103)       | 59.3<br>(32.1,99.4)   | 0.5<br>(-5.3,6.9)   |
| Libya                        | 3001<br>(1635,5017)       | 58.9<br>(32,97.8)     | 3813<br>(2058,6369)       | 59<br>(31.9,98.8)     | 0.1<br>(-5.9,6.2)   |
| Morocco                      | 17100<br>(9211,29062)     | 59.3<br>(31.9,101)    | 21054<br>(11245,35387)    | 59.2<br>(31.7,99.6)   | -0.3<br>(-6.1,6.2)  |
| Palestine                    | 1510<br>(814,2543)        | 59.1<br>(31.6,99.5)   | 3319<br>(1795,5536)       | 59<br>(31.7,98)       | -0.3<br>(-7,6.3)    |
| Oman                         | 1352<br>(734,2270)        | 57.9<br>(31.3,97.3)   | 2683<br>(1431,4532)       | 57.9<br>(31.3,97.8)   | 0<br>(-5.7,6.5)     |
| Qatar                        | 273<br>(147,454)          | 57.3<br>(31,96.4)     | 1508<br>(798,2551)        | 56.9<br>(30.2,96.2)   | -0.8<br>(-7.1,6.1)  |

|                               |                             |                      |                             |                       |                   |
|-------------------------------|-----------------------------|----------------------|-----------------------------|-----------------------|-------------------|
| Saudi Arabia                  | 11173<br>(6074,18879)       | 58.4<br>(31.9,99)    | 20168<br>(10830,34359)      | 58.4<br>(31.5,99.8)   | 0<br>(-6.3,6.2)   |
| Syrian Arab Republic          | 9346<br>(5026,15686)        | 59.1<br>(31.8,99.2)  | 8502<br>(4609,14354)        | 59.3<br>(32,99.7)     | 0.4<br>(-6,7)     |
| Tunisia                       | 5646<br>(3066,9439)         | 59.3<br>(32.2,99.4)  | 6437<br>(3465,10752)        | 59.4<br>(32.1,99.6)   | 0.1<br>(-5.9,6.1) |
| Turkey                        | 71313<br>(38070,119727)     | 107.9<br>(57.8,182)  | 80521<br>(42426,135343)     | 108.2<br>(57.4,181.5) | 0.3<br>(-5.6,6.4) |
| United Arab Emirates          | 1201<br>(643,2015)          | 57.5<br>(30.8,96.6)  | 4582<br>(2453,7783)         | 57.5<br>(30.7,95.4)   | 0<br>(-6.7,6.8)   |
| Yemen                         | 10229<br>(5581,17257)       | 58.7<br>(31.8,99.1)  | 21657<br>(11696,35978)      | 58.7<br>(31.8,97.6)   | 0<br>(-6,6.6)     |
| Afghanistan                   | 7764<br>(4236,13047)        | 58.6<br>(31.7,99.1)  | 27369<br>(15024,46254)      | 58.6<br>(31.9,99.2)   | 0<br>(-6.3,7.1)   |
| Sudan                         | 14164<br>(7711,23712)       | 59<br>(32.1,99)      | 27631<br>(14807,46383)      | 59<br>(31.8,99.1)     | 0<br>(-5.6,6.3)   |
| South Asia                    | 1065686<br>(568560,1766053) | 79.7<br>(42.6,132.5) | 1523248<br>(815461,2542231) | 80.2<br>(42.9,133.7)  | 0.6<br>(-0.6,1.9) |
| Bangladesh                    | 113633<br>(59001,190289)    | 80.1<br>(41.5,133.7) | 133162<br>(70807,223557)    | 80.8<br>(43.1,135.2)  | 0.8<br>(-4.5,6.2) |
| Bhutan                        | 622<br>(330,1022)           | 79.7<br>(42.1,131.7) | 609<br>(323,1017)           | 80<br>(42.4,132.7)    | 0.3<br>(-4.7,5.7) |
| India                         | 816858<br>(437857,1351523)  | 79.6<br>(42.8,131.9) | 1142513<br>(614488,1908249) | 80.1<br>(43,134.1)    | 0.6<br>(-0.7,2)   |
| Nepal                         | 19555<br>(10495,32586)      | 80.1<br>(43.1,133.9) | 26905<br>(14249,44799)      | 80.8<br>(42.5,134.6)  | 0.8<br>(-4.5,6.9) |
| Pakistan                      | 115020<br>(60921,192189)    | 79.9<br>(42.5,133)   | 220059<br>(118682,366880)   | 80.2<br>(43.3,133.4)  | 0.4<br>(-2.9,3.9) |
| Central Sub-Saharan<br>Africa | 33642<br>(18165,56602)      | 47.3<br>(25.4,79.1)  | 78438<br>(41906,132398)     | 47.6<br>(25.4,80.6)   | 0.5<br>(-4.1,5.3) |
| Angola                        | 6226<br>(3334,10493)        | 47.5<br>(25.7,79.8)  | 18691<br>(9802,31548)       | 47.9<br>(25.2,80.6)   | 0.7<br>(-5.7,7.7) |
| Central African<br>Republic   | 1624<br>(866,2722)          | 47.2<br>(25.3,79)    | 3094<br>(1669,5227)         | 47.5<br>(25.8,80.4)   | 0.5<br>(-6.1,7)   |

|                                  |                          |                      |                           |                      |                    |
|----------------------------------|--------------------------|----------------------|---------------------------|----------------------|--------------------|
| Congo                            | 1475<br>(782,2461)       | 47.6<br>(25.2,79.3)  | 2898<br>(1553,4863)       | 47.5<br>(25.5,80)    | -0.1<br>(-6.7,6.9) |
| Democratic Republic of the Congo | 23481<br>(12787,39550)   | 47.2<br>(25.4,78.8)  | 52023<br>(28035,87840)    | 47.5<br>(25.5,80.6)  | 0.5<br>(-6.1,7.2)  |
| Equatorial Guinea                | 261<br>(137,443)         | 47.2<br>(24.8,80.4)  | 820<br>(437,1375)         | 47.2<br>(25.2,79.9)  | -0.1<br>(-6.6,6.7) |
| Gabon                            | 573<br>(306,970)         | 47.4<br>(25.2,79.6)  | 912<br>(489,1548)         | 47.6<br>(25.6,80.6)  | 0.3<br>(-6.7,1)    |
| Eastern Sub-Saharan Africa       | 113838<br>(61320,190552) | 46.6<br>(25,78.4)    | 243541<br>(130189,410112) | 47.6<br>(25.4,80.1)  | 2.3<br>(0,4.4)     |
| Burundi                          | 3243<br>(1751,5418)      | 45.5<br>(24.6,76.9)  | 6884<br>(3693,11479)      | 45.6<br>(24.3,76.5)  | 0.2<br>(-6.7,1)    |
| Comoros                          | 269<br>(146,450)         | 45.6<br>(24.8,76.4)  | 353<br>(188,594)          | 45.8<br>(24.3,77.3)  | 0.3<br>(-6.3,7.3)  |
| Djibouti                         | 278<br>(151,468)         | 45.3<br>(24.4,76)    | 601<br>(322,1016)         | 45.4<br>(24.3,76.4)  | 0.3<br>(-6.8,7.3)  |
| Eritrea                          | 1746<br>(965,2923)       | 45.2<br>(24.9,76.7)  | 3645<br>(1969,6162)       | 45.6<br>(24.7,77.3)  | 0.7<br>(-5.7,8.6)  |
| Ethiopia                         | 26734<br>(14469,45238)   | 40<br>(21.5,67.4)    | 55512<br>(29634,92967)    | 41.2<br>(21.9,69.5)  | 3.1<br>(-1.8,8)    |
| Kenya                            | 11655<br>(6329,19519)    | 38.3<br>(20.8,64.6)  | 23985<br>(13033,40392)    | 40.5<br>(21.9,68)    | 5.5<br>(2,9.1)     |
| Madagascar                       | 6886<br>(3666,11500)     | 45.4<br>(24.2,75.7)  | 14765<br>(7815,24881)     | 45.7<br>(24.2,77.3)  | 0.6<br>(-5.9,8)    |
| Malawi                           | 5508<br>(2971,9341)      | 45.4<br>(24.6,77.5)  | 10532<br>(5723,17797)     | 45.7<br>(24.6,77.6)  | 0.6<br>(-5.4,7.2)  |
| Mozambique                       | 7520<br>(4015,12539)     | 45.5<br>(24.3,76.4)  | 17406<br>(9433,29352)     | 45.6<br>(24.7,76.4)  | 0.3<br>(-6.4,7.8)  |
| Rwanda                           | 2809<br>(1511,4733)      | 29.8<br>(16.2,50.2)  | 4492<br>(2425,7572)       | 30<br>(16.1,50.7)    | 0.7<br>(-7.6,10)   |
| Somalia                          | 4192<br>(2259,6929)      | 45.3<br>(24.5,75.7)  | 11894<br>(6353,20113)     | 45.4<br>(24.1,77.1)  | 0.4<br>(-6.9,7.7)  |
| United Republic of Tanzania      | 20983<br>(11377,34902)   | 63.6<br>(34.5,105.6) | 44375<br>(23934,74856)    | 63.4<br>(34.2,107.3) | -0.4<br>(-6.9,5.7) |

|                             |                          |                      |                           |                      |                    |
|-----------------------------|--------------------------|----------------------|---------------------------|----------------------|--------------------|
| Uganda                      | 13943<br>(7541,23182)    | 63.3<br>(34.1,106.1) | 33339<br>(17856,55650)    | 63.9<br>(34.6,107.1) | 0.9<br>(-5,7.1)    |
| Zambia                      | 4658<br>(2489,7815)      | 45.4<br>(24.3,76.4)  | 10252<br>(5476,17074)     | 45.5<br>(24.3,76)    | 0.3<br>(-6.2,7.4)  |
| South Sudan                 | 3329<br>(1798,5589)      | 45.2<br>(24.5,76.4)  | 5309<br>(2786,8813)       | 45.4<br>(23.8,75.7)  | 0.5<br>(-6.3,8)    |
| Southern Sub-Saharan Africa | 29891<br>(16028,49948)   | 47.9<br>(25.6,80.1)  | 38972<br>(20510,65444)    | 47.9<br>(25.2,80.6)  | -0.1<br>(-2.3,2.4) |
| Botswana                    | 790<br>(422,1346)        | 47.7<br>(25.7,80.7)  | 1161<br>(626,1953)        | 47.7<br>(25.6,80.1)  | -0.1<br>(-6.8,7.2) |
| Lesotho                     | 1062<br>(559,1777)       | 47.8<br>(25.3,80.1)  | 1071<br>(575,1808)        | 47.6<br>(25.6,80.7)  | -0.3<br>(-7.1,6.5) |
| Namibia                     | 831<br>(449,1406)        | 47.6<br>(25.6,80.6)  | 1287<br>(682,2147)        | 47.8<br>(25.4,79.9)  | 0.4<br>(-6.2,7.6)  |
| South Africa                | 20226<br>(10887,34202)   | 47.9<br>(25.7,81)    | 26173<br>(13841,44144)    | 47.8<br>(25.4,80.8)  | -0.2<br>(-2.7,2.6) |
| Eswatini                    | 511<br>(273,859)         | 48<br>(25.5,80)      | 623<br>(332,1037)         | 47.7<br>(25.4,79.2)  | -0.7<br>(-7.1,6)   |
| Zimbabwe                    | 6471<br>(3452,10889)     | 47.8<br>(25.6,79.8)  | 8656<br>(4553,14732)      | 48<br>(25.2,81.6)    | 0.3<br>(-6.2,7.6)  |
| Western Sub-Saharan Africa  | 118627<br>(63848,201275) | 48.1<br>(25.8,81.3)  | 277878<br>(150490,466382) | 48.5<br>(26.2,81.9)  | 0.9<br>(-0.5,2.2)  |
| Benin                       | 3176<br>(1707,5406)      | 48.3<br>(26.3,81.1)  | 7930<br>(4207,13506)      | 48.5<br>(26,82.4)    | 0.4<br>(-6.7,7.3)  |
| Burkina Faso                | 6147<br>(3275,10272)     | 48.1<br>(25.9,80.3)  | 14140<br>(7663,24033)     | 48.4<br>(26.2,82.3)  | 0.5<br>(-5.9,7.6)  |
| Cameroon                    | 7519<br>(4010,12655)     | 55.7<br>(29.7,93.8)  | 20151<br>(10927,33855)    | 56.6<br>(30.7,95.2)  | 1.5<br>(-6.2,8.9)  |
| Cabo Verde                  | 219<br>(117,367)         | 48.9<br>(26.1,82.5)  | 275<br>(148,468)          | 48.7<br>(26.1,82.8)  | -0.3<br>(-6.7,6.2) |
| Chad                        | 3858<br>(2053,6592)      | 48.4<br>(25.8,82.5)  | 10857<br>(5833,18631)     | 48.3<br>(26.1,82.2)  | -0.2<br>(-6.8,6.4) |
| Côte d'Ivoire               | 7688<br>(4117,12999)     | 47.9<br>(25.7,81)    | 15308<br>(8295,25628)     | 48.1<br>(26.1,80.9)  | 0.4<br>(-6,7.2)    |

|                       |                        |                     |                          |                     |                   |
|-----------------------|------------------------|---------------------|--------------------------|---------------------|-------------------|
| Gambia                | 628<br>(337,1078)      | 48.1<br>(25.8,81.8) | 1331<br>(711,2253)       | 48.4<br>(25.8,81.7) | 0.6<br>(-6.1,8.3) |
| Ghana                 | 7438<br>(3974,12700)   | 38.5<br>(20.5,64.6) | 13858<br>(7460,23632)    | 38.7<br>(20.8,65.9) | 0.5<br>(-6.7,8.9) |
| Guinea                | 3827<br>(2055,6578)    | 48.4<br>(25.8,82.6) | 7860<br>(4202,13336)     | 48.4<br>(25.8,82)   | 0.1<br>(-6.1,7)   |
| Guinea-Bissau         | 639<br>(343,1073)      | 48.4<br>(26,80.7)   | 1138<br>(614,1926)       | 48.5<br>(25.9,82.4) | 0.2<br>(-6.1,6.5) |
| Liberia               | 1208<br>(649,2058)     | 48<br>(25.9,81.7)   | 2740<br>(1483,4637)      | 48.2<br>(26,81.3)   | 0.4<br>(-6.7,2)   |
| Mali                  | 5832<br>(3194,9879)    | 51.7<br>(28.4,87.5) | 14854<br>(8002,25304)    | 51.8<br>(27.9,88.1) | 0.1<br>(-7.5,8.3) |
| Mauritania            | 1281<br>(699,2146)     | 48.4<br>(26.2,81.8) | 2343<br>(1240,3982)      | 48.5<br>(25.8,82.1) | 0.1<br>(-6.3,7.2) |
| Niger                 | 5236<br>(2856,8800)    | 48.2<br>(25.7,81.2) | 15561<br>(8404,26070)    | 48.3<br>(26,80.8)   | 0.2<br>(-6.3,7)   |
| Nigeria               | 54411<br>(29230,91466) | 48.3<br>(25.9,81.5) | 131162<br>(70477,219881) | 48.6<br>(26,81.9)   | 0.5<br>(-0.8,1.7) |
| Sao Tome and Principe | 77<br>(41,129)         | 48.6<br>(26.2,81.5) | 114<br>(62,194)          | 48.7<br>(26.5,82.5) | 0.2<br>(-6.1,7.3) |
| Senegal               | 4866<br>(2641,8308)    | 48.3<br>(26.1,82.3) | 8824<br>(4670,15055)     | 48.3<br>(25.6,82.3) | 0<br>(-7,6.7)     |
| Sierra Leone          | 2210<br>(1180,3758)    | 48.2<br>(26,81.8)   | 4847<br>(2611,8184)      | 48.3<br>(26.2,81.7) | 0.2<br>(-5.8,7.5) |
| Togo                  | 2364<br>(1279,3933)    | 48.3<br>(26.1,80.7) | 4582<br>(2470,7785)      | 48.4<br>(26.1,82.1) | 0.3<br>(-5.7,6.9) |

AD=atopic dermatitis. DALYs=disability-adjusted life-years. SDI=socio-demographic index.

95% UI=95% uncertainty interval.

**Table S8.** Years lived with disabilities of atopic dermatitis in 1990 and 2019 for both sexes and percentage change in age-standardized rates by location.

| YLDs of AD                            | 1990                         |                       | 2019                          |                       | Percentage change in age-standardized rates between 1990 and 2019 |
|---------------------------------------|------------------------------|-----------------------|-------------------------------|-----------------------|-------------------------------------------------------------------|
|                                       | Counts(95% UI)               | Rate(95% UI)          | Counts(95% UI)                | Rate(95% UI)          |                                                                   |
| Global                                | 5827142<br>(3089709,9784389) | 104<br>(55.3,174.6)   | 7480085<br>(3986821,12581232) | 99.7<br>(53.1,167.4)  | -4.1<br>(-4.8,-3.5)                                               |
| High SDI                              | 1158917<br>(618496,1945587)  | 161.8<br>(86.7,272.5) | 1240409<br>(663020,2080100)   | 155.5<br>(83.5,262)   | -3.8<br>(-4.7,-2.9)                                               |
| High-middle SDI                       | 1301514<br>(690908,2189633)  | 115.4<br>(61.3,194)   | 1498845<br>(801392,2510050)   | 120.4<br>(63.8,202.2) | 4.4<br>(3.3,5.6)                                                  |
| Low SDI                               | 406387<br>(220018,678934)    | 60.7<br>(32.7,101.7)  | 829148<br>(444490,1384307)    | 59.7<br>(32,100.1)    | -1.7<br>(-3,-0.3)                                                 |
| Low-middle SDI                        | 1118228<br>(597440,1860639)  | 85.5<br>(45.7,142.5)  | 1529171<br>(819894,2548717)   | 83.6<br>(44.8,139.8)  | -2.2<br>(-3.4,-1)                                                 |
| Middle SDI                            | 1838886<br>(976566,3084347)  | 103.9<br>(55.5,173.6) | 2377976<br>(1262654,3996298)  | 102.3<br>(54.3,171.7) | -1.6<br>(-2.7,-0.5)                                               |
| East Asia                             | 1294973<br>(692991,2172716)  | 107<br>(57.2,179)     | 1608174<br>(861025,2679567)   | 108.4<br>(58.3,180.1) | 1.4<br>(-1,3.8)                                                   |
| China                                 | 1239092<br>(662797,2079102)  | 106<br>(56.6,177)     | 1539727<br>(824236,2559834)   | 107.5<br>(57.8,178.1) | 1.4<br>(-1,4)                                                     |
| Democratic People's Republic of Korea | 26043<br>(14004,44036)       | 125.5<br>(67.5,211.2) | 32326<br>(17516,54145)        | 123<br>(67,205.8)     | -1.9<br>(-5.9,2.1)                                                |
| Taiwan (Province of China)            | 29838<br>(15772,50276)       | 146.6<br>(78,246.8)   | 36122<br>(19143,61063)        | 150.6<br>(80.3,253.1) | 2.7<br>(-2.1,7.7)                                                 |
| Southeast Asia                        | 695628<br>(368703,1173876)   | 149<br>(79.6,249.8)   | 1006056<br>(539808,1689425)   | 149.1<br>(79.9,250.5) | 0.1<br>(-1.3,1.4)                                                 |
| Cambodia                              | 14837<br>(7970,25038)        | 144.4<br>(78,241.6)   | 23658<br>(12546,39702)        | 142<br>(75.7,238.5)   | -1.7<br>(-5.4,2.3)                                                |
| Indonesia                             | 297622<br>(158489,497896)    | 160.7<br>(86.1,267.5) | 420929<br>(225158,706454)     | 162<br>(86.7,271.7)   | 0.8<br>(-1.7,3.3)                                                 |
| Lao People's Democratic Republic      | 5885<br>(3128,9953)          | 142.7<br>(75.7,240.1) | 10128<br>(5418,17115)         | 141.2<br>(75.7,237.1) | -1<br>(-4.7,2.8)                                                  |
| Malaysia                              | 24960                        | 140.9                 | 43806                         | 139.6                 | -1                                                                |



|                                  |                         |                       |                          |                       |                    |
|----------------------------------|-------------------------|-----------------------|--------------------------|-----------------------|--------------------|
|                                  | (13431,41909)           | (75.6,236)            | (23537,74206)            | (75.3,235.8)          | (-4.8,2.8)         |
| Maldives                         | 310<br>(167,522)        | 139.3<br>(74.9,234.8) | 644<br>(345,1082)        | 131<br>(69.8,218.1)   | -6<br>(-9.6,-2.3)  |
| Myanmar                          | 57968<br>(30806,97910)  | 141.3<br>(75.4,237.9) | 78183<br>(42080,131860)  | 143.1<br>(77,241.2)   | 1.2<br>(-2.8,5)    |
| Philippines                      | 89462<br>(47341,150604) | 141.5<br>(75.8,237.9) | 158455<br>(84475,266456) | 141.4<br>(75.8,237.5) | -0.1<br>(-0.9,0.8) |
| Sri Lanka                        | 21925<br>(11790,36810)  | 126.6<br>(68.3,212.4) | 27646<br>(14897,46398)   | 127.1<br>(68.4,213)   | 0.4<br>(-4.2,5)    |
| Thailand                         | 81052<br>(43239,137212) | 142.1<br>(75.9,239.8) | 99794<br>(53985,167440)  | 142.5<br>(76.8,239.3) | 0.3<br>(-3.4,4.3)  |
| Timor-Leste                      | 1087<br>(585,1825)      | 139.2<br>(75.5,235.8) | 1873<br>(1009,3147)      | 141<br>(75.9,236.8)   | 1.3<br>(-2.7,5.1)  |
| Viet Nam                         | 97937<br>(51526,164623) | 144<br>(76.4,242)     | 137692<br>(73697,229115) | 142.1<br>(76.1,235.7) | -1.3<br>(-5.2,2.6) |
| Mauritius                        | 1555<br>(832,2626)      | 140.8<br>(75.4,237.4) | 1791<br>(964,3006)       | 140.6<br>(75.9,235.5) | -0.1<br>(-4.3,6)   |
| Seychelles                       | 103<br>(56,174)         | 141<br>(76,237.5)     | 140<br>(75,233)          | 137.6<br>(73.7,228.7) | -2.4<br>(-6,1.6)   |
| Oceania                          | 8603<br>(4576,14452)    | 131.8<br>(70.2,221.2) | 17608<br>(9331,29741)    | 132<br>(70.4,222.4)   | 0.1<br>(-2.8,2.9)  |
| Fiji                             | 1020<br>(541,1731)      | 132.9<br>(70.6,224.1) | 1207<br>(644,2022)       | 132.3<br>(70.4,221.2) | -0.5<br>(-4.2,3.6) |
| Kiribati                         | 100<br>(54,166)         | 133.8<br>(72.6,222.5) | 160<br>(86,268)          | 134.2<br>(72.4,224.2) | 0.3<br>(-3.9,4)    |
| Marshall Islands                 | 62<br>(33,105)          | 132.2<br>(70.1,221.6) | 75<br>(40,127)           | 131.9<br>(70.2,222.3) | -0.2<br>(-4.2,3.6) |
| Micronesia (Federated States of) | 140<br>(75,234)         | 132.5<br>(70.9,222.4) | 135<br>(72,229)          | 132.5<br>(70.7,224.3) | 0<br>(-3.6,4)      |
| Papua New Guinea                 | 5415<br>(2891,9044)     | 131.4<br>(70.2,220.4) | 13070<br>(6918,22089)    | 131.7<br>(70.1,221.9) | 0.2<br>(-3.7,4.1)  |
| Samoa                            | 220<br>(118,369)        | 132.3<br>(70.6,220.8) | 283<br>(148,476)         | 132.6<br>(69.8,222.1) | 0.2<br>(-3.6,4)    |
| Solomon Islands                  | 455                     | 132.2                 | 877                      | 133                   | 0.6                |

|                          |                          |                        |                           |                        |                    |
|--------------------------|--------------------------|------------------------|---------------------------|------------------------|--------------------|
|                          | (242,767)                | (70.5,223.4)           | (467,1474)                | (71.4,223.5)           | (-3.1,4.6)         |
| Tonga                    | 131<br>(69,219)          | 134.5<br>(71.9,224.5)  | 138<br>(74,232)           | 134.7<br>(72.8,225.8)  | 0.1<br>(-3.8,4.1)  |
| Vanuatu                  | 204<br>(108,343)         | 132.6<br>(70.5,223.8)  | 397<br>(213,661)          | 133.2<br>(71.3,222.8)  | 0.5<br>(-3.1,4.7)  |
| American Samoa           | 65<br>(34,108)           | 132.8<br>(69.4,221.8)  | 74<br>(39,124)            | 133.2<br>(70.8,223.5)  | 0.3<br>(-3.6,4.1)  |
| Cook Islands             | 25<br>(13,42)            | 132.5<br>(70.6,221.5)  | 24<br>(13,41)             | 135.3<br>(73.4,227.8)  | 2.1<br>(-2.1,6.3)  |
| Guam                     | 178<br>(95,301)          | 131<br>(69.8,220.3)    | 225<br>(120,378)          | 132.2<br>(70.4,222.3)  | 0.9<br>(-3,5)      |
| Nauru                    | 14<br>(7,23)             | 132.6<br>(70,224)      | 14<br>(7,24)              | 133.7<br>(70.1,224.6)  | 0.8<br>(-3.1,4.9)  |
| Niue                     | 3<br>(2,5)               | 133.1<br>(70.4,222.8)  | 2<br>(1,4)                | 132.8<br>(71,223.1)    | -0.2<br>(-4.2,3.4) |
| Northern Mariana Islands | 59<br>(31,100)           | 131.1<br>(70.4,220.5)  | 55<br>(30,93)             | 132<br>(71.1,223)      | 0.7<br>(-3.1,5.1)  |
| Palau                    | 20<br>(11,34)            | 132.4<br>(71.1,223.6)  | 23<br>(12,38)             | 128.1<br>(68.6,213.8)  | -3.2<br>(-7.1,0.8) |
| Tokelau                  | 2<br>(1,4)               | 134.6<br>(72.5,225.1)  | 2<br>(1,3)                | 132.7<br>(71,222.4)    | -1.4<br>(-5.2,2.6) |
| Tuvalu                   | 13<br>(7,22)             | 136.6<br>(73.3,230.6)  | 16<br>(8,26)              | 131.6<br>(69.8,219.4)  | -3.6<br>(-7.4,0.4) |
| Central Asia             | 169827<br>(91806,284369) | 208.2<br>(111.9,349.5) | 196199<br>(104387,329284) | 207.2<br>(110.3,347.2) | -0.5<br>(-1.9,1)   |
| Armenia                  | 7495<br>(3964,12707)     | 208<br>(110.5,352.4)   | 5074<br>(2706,8560)       | 206.4<br>(110.2,348.3) | -0.8<br>(-4.1,2.6) |
| Azerbaijan               | 17118<br>(9192,28960)    | 208.3<br>(111.5,352.3) | 18527<br>(9857,31338)     | 205.9<br>(109.4,349)   | -1.2<br>(-4.3,2.5) |
| Georgia                  | 10661<br>(5773,17723)    | 208.9<br>(112.7,347.8) | 6015<br>(3232,10195)      | 204.4<br>(109,345.6)   | -2.1<br>(-8.2,4)   |
| Kazakhstan               | 36693<br>(19498,61232)   | 208.3<br>(111,347.3)   | 37548<br>(20015,62907)    | 208.3<br>(110.8,348.6) | 0<br>(-3.4,3.4)    |
| Kyrgyzstan               | 11236                    | 208.5                  | 14801                     | 208                    | -0.3               |

|                           |                         |                        |                         |                        |                     |
|---------------------------|-------------------------|------------------------|-------------------------|------------------------|---------------------|
|                           | (6051,19177)            | (111.9,350.5)          | (7836,24908)            | (110.3,349.9)          | (-3.5,3.3)          |
| Mongolia                  | 5823<br>(3139,9962)     | 207.7<br>(111.4,355.5) | 7313<br>(3872,12243)    | 208.6<br>(111.2,347.8) | 0.4<br>(-2.6,4.1)   |
| Tajikistan                | 14938<br>(8002,25029)   | 208.2<br>(112.5,345)   | 22421<br>(12001,37838)  | 207.1<br>(110.8,349.3) | -0.5<br>(-3.7,2.9)  |
| Turkmenistan              | 9857<br>(5215,16573)    | 208.6<br>(111.3,347.9) | 10874<br>(5779,18391)   | 206.6<br>(110.2,348.2) | -1<br>(-4.4,2.4)    |
| Uzbekistan                | 56005<br>(30295,95071)  | 207.8<br>(112.6,351.9) | 73627<br>(39323,123850) | 206.9<br>(110.7,348.1) | -0.4<br>(-4,3)      |
| Central Europe            | 90851<br>(48749,153200) | 84.4<br>(45.4,142)     | 66859<br>(35722,113307) | 84<br>(44.7,142.7)     | -0.5<br>(-2,1.1)    |
| Albania                   | 3249<br>(1761,5461)     | 87.3<br>(47.5,146.3)   | 1800<br>(970,3035)      | 87.7<br>(47,148.4)     | 0.4<br>(-4.5,6)     |
| Bosnia and<br>Herzegovina | 3607<br>(1957,6083)     | 87.5<br>(47.4,147.6)   | 1962<br>(1065,3263)     | 87.6<br>(47,146.3)     | 0.1<br>(-4.6,5.2)   |
| Bulgaria                  | 6070<br>(3221,10332)    | 87.7<br>(46.4,149.1)   | 4050<br>(2159,6832)     | 87.6<br>(46.6,147.1)   | -0.1<br>(-5.6,5.6)  |
| Croatia                   | 3447<br>(1844,5772)     | 87.7<br>(46.3,146.4)   | 2494<br>(1332,4193)     | 87.7<br>(47,147.2)     | -0.1<br>(-5.2,5.5)  |
| Czechia                   | 7372<br>(3981,12393)    | 87.7<br>(47,147.4)     | 6560<br>(3478,11138)    | 87.5<br>(46.3,150.6)   | -0.2<br>(-4.8,4.8)  |
| Hungary                   | 9951<br>(5344,16871)    | 119.8<br>(64.3,203.9)  | 7864<br>(4222,13289)    | 120<br>(64.5,204.1)    | 0.2<br>(-4.1,4.6)   |
| North Macedonia           | 1682<br>(902,2840)      | 87.5<br>(46.9,147.7)   | 1350<br>(732,2254)      | 87.5<br>(47.3,147.4)   | -0.1<br>(-5.4,5.3)  |
| Montenegro                | 515<br>(276,863)        | 87.7<br>(46.8,146.9)   | 407<br>(220,681)        | 87.7<br>(47,146.5)     | 0<br>(-5.1,5.2)     |
| Poland                    | 29644<br>(15776,49700)  | 85.7<br>(45.7,143.6)   | 21943<br>(11771,36796)  | 81.9<br>(43.9,137.8)   | -4.4<br>(-7.2,-1.5) |
| Romania                   | 12697<br>(6743,21132)   | 61.3<br>(32.5,102.3)   | 8245<br>(4364,13791)    | 61.9<br>(32.6,104.3)   | 1<br>(-6,7.6)       |
| Serbia                    | 6992<br>(3799,11656)    | 87.8<br>(47.4,146.3)   | 5584<br>(3015,9361)     | 87.7<br>(47,148.2)     | -0.2<br>(-5,5.1)    |
| Slovakia                  | 4207                    | 87.8                   | 3355                    | 87.7                   | -0.1                |

|                          |                           |                        |                           |                        |                    |
|--------------------------|---------------------------|------------------------|---------------------------|------------------------|--------------------|
|                          | (2253,7099)               | (47.2,148.5)           | (1799,5570)               | (46.9,147.6)           | (-5.3,5.2)         |
| Slovenia                 | 1417<br>(759,2403)        | 87.8<br>(46.9,148.9)   | 1245<br>(677,2107)        | 87.5<br>(47.1,148.7)   | -0.4<br>(-6,5.7)   |
| Eastern Europe           | 265747<br>(141772,448391) | 135.3<br>(72.3,228.6)  | 212788<br>(113396,360336) | 137.7<br>(73.1,233.3)  | 1.8<br>(0.3,3.2)   |
| Belarus                  | 8535<br>(4521,14337)      | 92.8<br>(49.1,156.7)   | 6475<br>(3508,10908)      | 92.6<br>(49.5,156.7)   | -0.2<br>(-5.1,4.6) |
| Estonia                  | 2873<br>(1548,4841)       | 213.1<br>(114.9,358.1) | 1966<br>(1052,3306)       | 212.9<br>(113.2,360)   | -0.1<br>(-3.3,3.1) |
| Latvia                   | 1339<br>(714,2254)        | 60<br>(32,101.3)       | 787<br>(424,1363)         | 60<br>(32.2,103.6)     | -0.1<br>(-7.2,7.1) |
| Lithuania                | 2960<br>(1593,4939)       | 92.9<br>(49.8,154.7)   | 1767<br>(960,2981)        | 92.7<br>(49.8,157.9)   | -0.2<br>(-5.3,4.6) |
| Republic of Moldova      | 4067<br>(2189,6808)       | 92.7<br>(49.8,155.1)   | 2340<br>(1255,3900)       | 92.5<br>(49.2,154.9)   | -0.2<br>(-5.2,5.1) |
| Russian Federation       | 203894<br>(108935,344705) | 154.3<br>(82.3,261.2)  | 170675<br>(90555,288247)  | 153.7<br>(81.7,259.9)  | -0.4<br>(-1.9,1)   |
| Ukraine                  | 42079<br>(22668,70862)    | 95.4<br>(51.4,160.8)   | 28778<br>(15661,48852)    | 95.2<br>(51.3,162.1)   | -0.2<br>(-5.5,5.2) |
| High-income Asia Pacific | 316556<br>(169574,530442) | 216.4<br>(115.7,361.7) | 277889<br>(151340,465932) | 216.2<br>(116.3,365.2) | -0.1<br>(-2.8,2.5) |
| Brunei Darussalam        | 521<br>(274,887)          | 176.4<br>(93.5,298.6)  | 671<br>(355,1133)         | 177.1<br>(94,298.5)    | 0.4<br>(-3.2,4.1)  |
| Japan                    | 237194<br>(127300,397149) | 235.9<br>(126.7,396.5) | 205111<br>(110879,342695) | 236.1<br>(126.3,396.9) | 0.1<br>(-3.3,3.1)  |
| Republic of Korea        | 74653<br>(39602,124552)   | 177.1<br>(93.7,295.7)  | 65736<br>(35568,111406)   | 178.8<br>(96.7,302.5)  | 1<br>(-4.1,6.6)    |
| Singapore                | 4189<br>(2243,7078)       | 160.8<br>(85.9,272.3)  | 6371<br>(3427,10742)      | 159.8<br>(86.4,270.3)  | -0.6<br>(-6.4,5.9) |
| Australasia              | 21020<br>(11410,36091)    | 116.8<br>(63.4,200.4)  | 27547<br>(14760,46221)    | 116.6<br>(62.4,197)    | -0.1<br>(-4.9,5)   |
| Australia                | 16486<br>(8939,28609)     | 110.5<br>(59.8,190.9)  | 21980<br>(11767,37024)    | 110.5<br>(59,187)      | -0.1<br>(-5.8,6.5) |
| New Zealand              | 4534                      | 146.8                  | 5566                      | 149.2                  | 1.6                |

|                |                           |                        |                           |                        |                    |
|----------------|---------------------------|------------------------|---------------------------|------------------------|--------------------|
|                | (2471,7571)               | (79.8,244.8)           | (2984,9291)               | (79.7,250.3)           | (-3,6.4)           |
| Western Europe | 557123<br>(300143,937435) | 178.4<br>(96.1,301.2)  | 589199<br>(315986,990299) | 178.8<br>(96.1,302.1)  | 0.2<br>(-1,1.4)    |
| Andorra        | 69<br>(37,115)            | 162.7<br>(87.3,271.7)  | 93<br>(50,158)            | 163.7<br>(87.3,275.6)  | 0.6<br>(-3.2,4.4)  |
| Austria        | 10184<br>(5450,17113)     | 164<br>(87.8,277.9)    | 10721<br>(5797,17948)     | 163.6<br>(87.9,273.9)  | -0.3<br>(-3.6,3.2) |
| Belgium        | 13170<br>(7022,21935)     | 164<br>(87.9,274)      | 14575<br>(7780,24361)     | 164<br>(87.3,273.3)    | 0<br>(-3.6,3.9)    |
| Cyprus         | 1123<br>(606,1878)        | 154.1<br>(82.9,259.2)  | 1533<br>(823,2608)        | 153.9<br>(83.4,265.1)  | -0.1<br>(-6.1,5.7) |
| Denmark        | 8137<br>(4362,13841)      | 200.8<br>(106.9,340)   | 9139<br>(4827,15408)      | 204.2<br>(107.5,344.4) | 1.7<br>(-4.1,7.7)  |
| Finland        | 6730<br>(3610,11219)      | 164<br>(88.2,274.8)    | 6883<br>(3684,11492)      | 163.9<br>(86.6,276.3)  | -0.1<br>(-3.7,3.8) |
| France         | 111086<br>(59297,185490)  | 224.5<br>(119.3,376.4) | 119035<br>(63457,199651)  | 224.5<br>(118.4,380.8) | 0<br>(-3.2,3.3)    |
| Germany        | 97277<br>(52205,163070)   | 158.5<br>(86,266.7)    | 98027<br>(52612,162850)   | 160<br>(84.8,268.1)    | 1<br>(-3.9,5.9)    |
| Greece         | 10979<br>(5888,18816)     | 129.6<br>(69.3,222.8)  | 9663<br>(5224,16391)      | 130.6<br>(70.7,223.7)  | 0.7<br>(-4.9,7)    |
| Iceland        | 445<br>(236,755)          | 187.2<br>(99.5,318)    | 530<br>(283,893)          | 186.1<br>(98.5,315.5)  | -0.5<br>(-6.3,5.4) |
| Ireland        | 5766<br>(3120,9731)       | 164<br>(88.6,276.9)    | 6827<br>(3706,11528)      | 164.2<br>(88.9,276.3)  | 0.1<br>(-3.7,4)    |
| Israel         | 8556<br>(4586,14247)      | 164.5<br>(88.1,274)    | 15135<br>(8103,25390)     | 164.2<br>(87.7,275.4)  | -0.2<br>(-4.3,3.8) |
| Italy          | 82648<br>(43968,138887)   | 189<br>(100.3,320.4)   | 80465<br>(43514,134478)   | 188.9<br>(100.4,320.2) | -0.1<br>(-1.2,1)   |
| Luxembourg     | 493<br>(266,828)          | 164.1<br>(88,275.8)    | 766<br>(407,1289)         | 163.7<br>(86.8,274.5)  | -0.2<br>(-3.7,3.5) |
| Malta          | 547<br>(293,918)          | 163.8<br>(88.2,275.9)  | 526<br>(283,879)          | 163.5<br>(88.4,274.8)  | -0.2<br>(-3.9,3.6) |
| Netherlands    | 19942                     | 164.3                  | 21417                     | 164.2                  | 0                  |

|                           |                           |                        |                           |                       |                     |
|---------------------------|---------------------------|------------------------|---------------------------|-----------------------|---------------------|
|                           | (10665,33507)             | (87.3,274.7)           | (11540,35776)             | (88.4,274.4)          | (-3.7,3.7)          |
| Norway                    | 6392<br>(3456,10687)      | 182.9<br>(98.5,307.4)  | 7739<br>(4147,12956)      | 183.9<br>(97.8,309)   | 0.6<br>(-2.9,4.5)   |
| Portugal                  | 14098<br>(7626,23715)     | 164.1<br>(89.2,274.7)  | 12375<br>(6655,20762)     | 164.3<br>(88.1,276.5) | 0.1<br>(-3.8,4)     |
| Spain                     | 48151<br>(26039,81579)    | 149.3<br>(80.8,256)    | 49809<br>(27084,84481)    | 149.2<br>(80.5,252.7) | -0.1<br>(-3.8,4.1)  |
| Sweden                    | 11445<br>(6184,19105)     | 165.6<br>(88.9,278)    | 13438<br>(7244,22500)     | 165.4<br>(89.2,276.6) | -0.1<br>(-3.1,3.1)  |
| Switzerland               | 8800<br>(4738,14741)      | 163.6<br>(88.2,274.4)  | 10678<br>(5714,17926)     | 163.8<br>(87.5,276.3) | 0.1<br>(-3.4,3.9)   |
| United Kingdom            | 90554<br>(48914,150955)   | 191.5<br>(102.4,319.6) | 99226<br>(53429,165874)   | 187.3<br>(100.4,314)  | -2.2<br>(-4.5,0.5)  |
| Monaco                    | 34<br>(18,57)             | 164<br>(87.9,275.6)    | 44<br>(24,73)             | 164.6<br>(87.9,278.1) | 0.4<br>(-3.3,3.9)   |
| San Marino                | 32<br>(17,54)             | 164.4<br>(87.9,279.1)  | 42<br>(22,70)             | 164.8<br>(87.4,276.9) | 0.2<br>(-3.2,4.1)   |
| Southern Latin America    | 68794<br>(37079,116092)   | 134.8<br>(72.7,227.6)  | 80109<br>(43486,134797)   | 134.6<br>(73.4,227.3) | -0.2<br>(-3.4,3.1)  |
| Argentina                 | 46206<br>(24969,77739)    | 134.8<br>(72.7,226.6)  | 55414<br>(29951,93129)    | 134.7<br>(73.1,226.2) | -0.1<br>(-4.2,4.4)  |
| Chile                     | 18545<br>(9837,31229)     | 135<br>(71.4,226.7)    | 20704<br>(11128,34851)    | 134.4<br>(72.3,227.5) | -0.4<br>(-4.3,3.6)  |
| Uruguay                   | 4040<br>(2189,6810)       | 134.7<br>(73.1,226.9)  | 3987<br>(2130,6730)       | 134.7<br>(72.2,226.7) | 0<br>(-4,4.4)       |
| High-income North America | 345923<br>(185494,579462) | 138.3<br>(74.3,232)    | 396747<br>(213205,660857) | 132.5<br>(70.6,222.3) | -4.2<br>(-5.4,-3.1) |
| Canada                    | 20862<br>(11195,34915)    | 87.6<br>(46.7,146.5)   | 25819<br>(13822,43286)    | 87.5<br>(46.7,147.9)  | -0.1<br>(-4.9,5.2)  |
| United States of America  | 325007<br>(174550,544636) | 143.6<br>(77.1,241)    | 370880<br>(199067,617823) | 137.2<br>(73.2,230.2) | -4.5<br>(-5.7,-3.4) |
| Greenland                 | 46<br>(24,77)             | 86.2<br>(46.1,144.5)   | 42<br>(22,72)             | 86.9<br>(46,148.5)    | 0.7<br>(-4.1,6.2)   |
| Caribbean                 | 32249                     | 85                     | 37557                     | 84.8                  | -0.2                |

|                                     |                      |                      |                       |                      |                    |
|-------------------------------------|----------------------|----------------------|-----------------------|----------------------|--------------------|
|                                     | (17349,53726)        | (45.8,141.5)         | (20157,62943)         | (45.7,142)           | (-2.6,2.2)         |
| Antigua and Barbuda                 | 54<br>(30,91)        | 85.3<br>(46.6,143.6) | 63<br>(34,105)        | 85.1<br>(46.1,140.9) | -0.2<br>(-5.9,4.8) |
| Bahamas                             | 232<br>(126,393)     | 85.3<br>(46.3,144.9) | 281<br>(151,478)      | 85.3<br>(45.6,144.2) | -0.1<br>(-5.4,5.6) |
| Barbados                            | 204<br>(110,347)     | 85.2<br>(46,144.6)   | 201<br>(107,340)      | 85.1<br>(45.5,143.9) | -0.1<br>(-5.2,5.2) |
| Belize                              | 200<br>(108,337)     | 84.9<br>(45.5,143.8) | 360<br>(194,607)      | 85<br>(45.8,142.8)   | 0.1<br>(-5.2,5.8)  |
| Cuba                                | 8569<br>(4602,14406) | 85<br>(45.7,143.1)   | 7527<br>(4096,12543)  | 84.8<br>(46.3,141.4) | -0.2<br>(-5.4,5.3) |
| Dominica                            | 68<br>(37,115)       | 85<br>(46,142.7)     | 51<br>(27,86)         | 84.9<br>(45.4,142.8) | -0.2<br>(-5,5.4)   |
| Dominican Republic                  | 7178<br>(3838,12120) | 85.2<br>(45.7,143.3) | 9236<br>(4944,15539)  | 85.1<br>(45.7,143.2) | -0.1<br>(-5.1,5.2) |
| Grenada                             | 85<br>(46,142)       | 85<br>(46,143)       | 78<br>(42,130)        | 84.7<br>(46.1,141.9) | -0.3<br>(-5.3,5.4) |
| Guyana                              | 751<br>(401,1273)    | 84.6<br>(45.5,142.8) | 644<br>(348,1082)     | 84.6<br>(45.7,141.3) | 0.1<br>(-4.9,5.3)  |
| Haiti                               | 6618<br>(3585,11078) | 84.6<br>(45.8,141.2) | 11583<br>(6210,19454) | 84.5<br>(45.5,141.6) | -0.2<br>(-5,5)     |
| Jamaica                             | 2274<br>(1232,3848)  | 85.3<br>(46.1,144.3) | 2147<br>(1154,3642)   | 85<br>(46,144.2)     | -0.4<br>(-5.4,5)   |
| Saint Lucia                         | 137<br>(74,231)      | 85.1<br>(45.9,143)   | 122<br>(66,207)       | 85<br>(46.1,143.6)   | -0.1<br>(-5.5,5.1) |
| Saint Vincent and the<br>Grenadines | 110<br>(59,184)      | 85<br>(46,142)       | 86<br>(46,144)        | 84.8<br>(45.3,142.5) | -0.3<br>(-5.5,4.9) |
| Suriname                            | 363<br>(196,601)     | 84.9<br>(45.9,140.9) | 463<br>(251,784)      | 84.8<br>(46,142.7)   | -0.1<br>(-5.4,5.6) |
| Trinidad and Tobago                 | 1127<br>(613,1886)   | 85.1<br>(46.3,142.3) | 992<br>(535,1666)     | 84.9<br>(45.8,143.4) | -0.2<br>(-5.5,5)   |
| Bermuda                             | 44<br>(23,73)        | 85.4<br>(45.8,143.8) | 40<br>(21,68)         | 85.4<br>(45.4,145.4) | 0<br>(-4.8,4.9)    |
| Puerto Rico                         | 3031                 | 85.2                 | 2293                  | 85.2                 | 0                  |

|                                    |                          |                      |                          |                      |                    |
|------------------------------------|--------------------------|----------------------|--------------------------|----------------------|--------------------|
|                                    | (1646,5109)              | (46.3,144.2)         | (1232,3823)              | (45.4,142.4)         | (-5.3,5.7)         |
| Saint Kitts and Nevis              | 39<br>(21,66)            | 85.1<br>(45.5,143.7) | 43<br>(23,72)            | 85.1<br>(45.7,144.3) | 0.1<br>(-5,5.4)    |
| United States Virgin Islands       | 92<br>(50,157)           | 85.4<br>(46.2,145.1) | 74<br>(40,124)           | 85.3<br>(45.8,143.1) | -0.1<br>(-5.4,5.6) |
| Andean Latin America               | 37232<br>(20103,62863)   | 82.2<br>(44.5,138)   | 52923<br>(28045,88654)   | 82.9<br>(43.9,138.6) | 0.8<br>(-2.6,4.6)  |
| Bolivia (Plurinational State of)   | 6660<br>(3625,11251)     | 84.2<br>(45.9,140.9) | 10913<br>(5934,18407)    | 84.4<br>(45.7,142.1) | 0.1<br>(-4.7,5.7)  |
| Ecuador                            | 10909<br>(5845,18461)    | 92.3<br>(49.6,154.7) | 16452<br>(8721,27630)    | 92.7<br>(49.1,155.4) | 0.4<br>(-5.5,6.8)  |
| Peru                               | 19663<br>(10574,33203)   | 77<br>(41.5,129.5)   | 25557<br>(13785,42899)   | 77.1<br>(41.5,129.5) | 0.2<br>(-5.1,6.4)  |
| Central Latin America              | 126032<br>(68155,212063) | 64.1<br>(34.7,108.2) | 154576<br>(84151,260390) | 64.1<br>(35,108.3)   | 0<br>(-1.5,1.7)    |
| Colombia                           | 23776<br>(12773,40602)   | 63.8<br>(34.4,109.4) | 27669<br>(14793,46188)   | 63.8<br>(34.5,106.1) | 0<br>(-5.6,6.1)    |
| Costa Rica                         | 2258<br>(1214,3837)      | 63.9<br>(34.3,108.1) | 2701<br>(1437,4631)      | 64<br>(34.3,109.5)   | 0.1<br>(-5.6,6.2)  |
| El Salvador                        | 4060<br>(2176,6766)      | 63.6<br>(34.3,106)   | 3971<br>(2154,6673)      | 63.9<br>(34.7,107.3) | 0.5<br>(-5.7,6.5)  |
| Guatemala                          | 6568<br>(3539,11000)     | 63.4<br>(34.2,105.6) | 12406<br>(6714,20810)    | 63.7<br>(34.6,107.3) | 0.5<br>(-5.6,6.5)  |
| Honduras                           | 3970<br>(2120,6730)      | 63.7<br>(34,107.8)   | 6924<br>(3703,11695)     | 63.8<br>(34.1,107.6) | 0.1<br>(-5.8,6.3)  |
| Mexico                             | 66307<br>(35752,111003)  | 64.4<br>(34.7,108.3) | 77163<br>(41776,129345)  | 64.5<br>(34.9,108)   | 0<br>(-1.4,1.6)    |
| Nicaragua                          | 3300<br>(1768,5575)      | 63.7<br>(34.1,107)   | 4376<br>(2364,7356)      | 63.9<br>(34.5,107.4) | 0.3<br>(-5.8,6.1)  |
| Panama                             | 1718<br>(918,2868)       | 63.7<br>(34.2,106.6) | 2620<br>(1436,4389)      | 63.9<br>(35,107)     | 0.2<br>(-5.2,6.4)  |
| Venezuela (Bolivarian Republic of) | 14073<br>(7612,23433)    | 63.8<br>(34.4,106.4) | 16745<br>(9045,28190)    | 63.8<br>(34.3,107.4) | 0.1<br>(-5.8,6.5)  |
| Tropical Latin America             | 176414                   | 103.7                | 209058                   | 103.8                | 0.1                |



|                              |                           |                       |                           |                      |                     |
|------------------------------|---------------------------|-----------------------|---------------------------|----------------------|---------------------|
|                              | (94483,295332)            | (55.9,173.5)          | (112004,349236)           | (55.4,173.4)         | (-2.9,2.7)          |
| Brazil                       | 171242<br>(91690,286882)  | 103.6<br>(55.8,173.5) | 201682<br>(108006,336470) | 103.7<br>(55.4,173)  | 0<br>(-3,2.9)       |
| Paraguay                     | 5172<br>(2753,8672)       | 106<br>(57.5,177.8)   | 7376<br>(3945,12498)      | 106<br>(56.7,179.4)  | 0<br>(-4.7,4.8)     |
| North Africa and Middle East | 258486<br>(138378,433513) | 64.3<br>(34.4,108)    | 384720<br>(207542,647825) | 61.3<br>(33,103.2)   | -4.7<br>(-6.5,-2.6) |
| Algeria                      | 17711<br>(9444,29394)     | 59.2<br>(31.5,98.5)   | 25165<br>(13369,41875)    | 59.2<br>(31.5,98.7)  | -0.1<br>(-6,6.4)    |
| Bahrain                      | 329<br>(174,556)          | 58.4<br>(30.8,98.8)   | 741<br>(402,1266)         | 58.2<br>(31.5,98.9)  | -0.3<br>(-6.7,6.6)  |
| Egypt                        | 25257<br>(13585,42848)    | 39<br>(20.8,66.2)     | 40283<br>(21785,68494)    | 37.7<br>(20.4,64.2)  | -3.4<br>(-11.4,5.2) |
| Iran (Islamic Republic of)   | 42392<br>(22655,70758)    | 59.5<br>(31.8,100)    | 49008<br>(26429,82662)    | 60<br>(32.4,101.6)   | 0.8<br>(-2.9,4.3)   |
| Iraq                         | 12571<br>(6733,21096)     | 58.7<br>(31.5,98.3)   | 27031<br>(14398,46179)    | 58.9<br>(31.4,100.8) | 0.3<br>(-5.6,6.7)   |
| Jordan                       | 2692<br>(1468,4555)       | 59<br>(32,99.7)       | 7341<br>(3922,12521)      | 58.8<br>(31.4,100.2) | -0.4<br>(-6.6,5.9)  |
| Kuwait                       | 1144<br>(610,1906)        | 58.5<br>(31.1,97.4)   | 2482<br>(1328,4189)       | 59<br>(31.7,100)     | 0.8<br>(-4.9,6.9)   |
| Lebanon                      | 2145<br>(1155,3591)       | 59<br>(31.7,98.6)     | 3033<br>(1644,5103)       | 59.3<br>(32.1,99.4)  | 0.5<br>(-5.3,6.9)   |
| Libya                        | 3001<br>(1635,5017)       | 58.9<br>(32,97.8)     | 3813<br>(2058,6369)       | 59<br>(31.9,98.8)    | 0.1<br>(-5.9,6.2)   |
| Morocco                      | 17100<br>(9211,29062)     | 59.3<br>(31.9,101)    | 21054<br>(11245,35387)    | 59.2<br>(31.7,99.6)  | -0.3<br>(-6.1,6.2)  |
| Palestine                    | 1510<br>(814,2543)        | 59.1<br>(31.6,99.5)   | 3319<br>(1795,5536)       | 59<br>(31.7,98)      | -0.3<br>(-7,6.3)    |
| Oman                         | 1352<br>(734,2270)        | 57.9<br>(31.3,97.3)   | 2683<br>(1431,4532)       | 57.9<br>(31.3,97.8)  | 0<br>(-5.7,6.5)     |
| Qatar                        | 273<br>(147,454)          | 57.3<br>(31,96.4)     | 1508<br>(798,2551)        | 56.9<br>(30.2,96.2)  | -0.8<br>(-7.1,6.1)  |
| Saudi Arabia                 | 11173                     | 58.4                  | 20168                     | 58.4                 | 0                   |

|                            |                             |                      |                             |                       |                   |
|----------------------------|-----------------------------|----------------------|-----------------------------|-----------------------|-------------------|
|                            | (6074,18879)                | (31.9,99)            | (10830,34359)               | (31.5,99.8)           | (-6.3,6.2)        |
| Syrian Arab Republic       | 9346<br>(5026,15686)        | 59.1<br>(31.8,99.2)  | 8502<br>(4609,14354)        | 59.3<br>(32,99.7)     | 0.4<br>(-6,7)     |
| Tunisia                    | 5646<br>(3066,9439)         | 59.3<br>(32.2,99.4)  | 6437<br>(3465,10752)        | 59.4<br>(32.1,99.6)   | 0.1<br>(-5.9,6.1) |
| Turkey                     | 71313<br>(38070,119727)     | 107.9<br>(57.8,182)  | 80521<br>(42426,135343)     | 108.2<br>(57.4,181.5) | 0.3<br>(-5.6,6.4) |
| United Arab Emirates       | 1201<br>(643,2015)          | 57.5<br>(30.8,96.6)  | 4582<br>(2453,7783)         | 57.5<br>(30.7,95.4)   | 0<br>(-6.7,6.8)   |
| Yemen                      | 10229<br>(5581,17257)       | 58.7<br>(31.8,99.1)  | 21657<br>(11696,35978)      | 58.7<br>(31.8,97.6)   | 0<br>(-6,6.6)     |
| Afghanistan                | 7764<br>(4236,13047)        | 58.6<br>(31.7,99.1)  | 27369<br>(15024,46254)      | 58.6<br>(31.9,99.2)   | 0<br>(-6.3,7.1)   |
| Sudan                      | 14164<br>(7711,23712)       | 59<br>(32.1,99)      | 27631<br>(14807,46383)      | 59<br>(31.8,99.1)     | 0<br>(-5.6,6.3)   |
| South Asia                 | 1065686<br>(568560,1766053) | 79.7<br>(42.6,132.5) | 1523248<br>(815461,2542231) | 80.2<br>(42.9,133.7)  | 0.6<br>(-0.6,1.9) |
| Bangladesh                 | 113633<br>(59001,190289)    | 80.1<br>(41.5,133.7) | 133162<br>(70807,223557)    | 80.8<br>(43.1,135.2)  | 0.8<br>(-4.5,6.2) |
| Bhutan                     | 622<br>(330,1022)           | 79.7<br>(42.1,131.7) | 609<br>(323,1017)           | 80<br>(42.4,132.7)    | 0.3<br>(-4.7,5.7) |
| India                      | 816858<br>(437857,1351523)  | 79.6<br>(42.8,131.9) | 1142513<br>(614488,1908249) | 80.1<br>(43,134.1)    | 0.6<br>(-0.7,2)   |
| Nepal                      | 19555<br>(10495,32586)      | 80.1<br>(43.1,133.9) | 26905<br>(14249,44799)      | 80.8<br>(42.5,134.6)  | 0.8<br>(-4.5,6.9) |
| Pakistan                   | 115020<br>(60921,192189)    | 79.9<br>(42.5,133)   | 220059<br>(118682,366880)   | 80.2<br>(43.3,133.4)  | 0.4<br>(-2.9,3.9) |
| Central Sub-Saharan Africa | 33642<br>(18165,56602)      | 47.3<br>(25.4,79.1)  | 78438<br>(41906,132398)     | 47.6<br>(25.4,80.6)   | 0.5<br>(-4.1,5.3) |
| Angola                     | 6226<br>(3334,10493)        | 47.5<br>(25.7,79.8)  | 18691<br>(9802,31548)       | 47.9<br>(25.2,80.6)   | 0.7<br>(-5.7,7.7) |
| Central African Republic   | 1624<br>(866,2722)          | 47.2<br>(25.3,79)    | 3094<br>(1669,5227)         | 47.5<br>(25.8,80.4)   | 0.5<br>(-6.1,7)   |
| Congo                      | 1475                        | 47.6                 | 2898                        | 47.5                  | -0.1              |

|                                  |                          |                      |                           |                      |                    |
|----------------------------------|--------------------------|----------------------|---------------------------|----------------------|--------------------|
|                                  | (782,2461)               | (25.2,79.3)          | (1553,4863)               | (25.5,80)            | (-6.7,6.9)         |
| Democratic Republic of the Congo | 23481<br>(12787,39550)   | 47.2<br>(25.4,78.8)  | 52023<br>(28035,87840)    | 47.5<br>(25.5,80.6)  | 0.5<br>(-6.1,7.2)  |
| Equatorial Guinea                | 261<br>(137,443)         | 47.2<br>(24.8,80.4)  | 820<br>(437,1375)         | 47.2<br>(25.2,79.9)  | -0.1<br>(-6.6,6.7) |
| Gabon                            | 573<br>(306,970)         | 47.4<br>(25.2,79.6)  | 912<br>(489,1548)         | 47.6<br>(25.6,80.6)  | 0.3<br>(-6.7,1)    |
| Eastern Sub-Saharan Africa       | 113838<br>(61320,190552) | 46.6<br>(25,78.4)    | 243541<br>(130189,410112) | 47.6<br>(25.4,80.1)  | 2.3<br>(0,4.4)     |
| Burundi                          | 3243<br>(1751,5418)      | 45.5<br>(24.6,76.9)  | 6884<br>(3693,11479)      | 45.6<br>(24.3,76.5)  | 0.2<br>(-6.7,1)    |
| Comoros                          | 269<br>(146,450)         | 45.6<br>(24.8,76.4)  | 353<br>(188,594)          | 45.8<br>(24.3,77.3)  | 0.3<br>(-6.3,7.3)  |
| Djibouti                         | 278<br>(151,468)         | 45.3<br>(24.4,76)    | 601<br>(322,1016)         | 45.4<br>(24.3,76.4)  | 0.3<br>(-6.8,7.3)  |
| Eritrea                          | 1746<br>(965,2923)       | 45.2<br>(24.9,76.7)  | 3645<br>(1969,6162)       | 45.6<br>(24.7,77.3)  | 0.7<br>(-5.7,8.6)  |
| Ethiopia                         | 26734<br>(14469,45238)   | 40<br>(21.5,67.4)    | 55512<br>(29634,92967)    | 41.2<br>(21.9,69.5)  | 3.1<br>(-1.8,8)    |
| Kenya                            | 11655<br>(6329,19519)    | 38.3<br>(20.8,64.6)  | 23985<br>(13033,40392)    | 40.5<br>(21.9,68)    | 5.5<br>(2,9.1)     |
| Madagascar                       | 6886<br>(3666,11500)     | 45.4<br>(24.2,75.7)  | 14765<br>(7815,24881)     | 45.7<br>(24.2,77.3)  | 0.6<br>(-5.9,8)    |
| Malawi                           | 5508<br>(2971,9341)      | 45.4<br>(24.6,77.5)  | 10532<br>(5723,17797)     | 45.7<br>(24.6,77.6)  | 0.6<br>(-5.4,7.2)  |
| Mozambique                       | 7520<br>(4015,12539)     | 45.5<br>(24.3,76.4)  | 17406<br>(9433,29352)     | 45.6<br>(24.7,76.4)  | 0.3<br>(-6.4,7.8)  |
| Rwanda                           | 2809<br>(1511,4733)      | 29.8<br>(16.2,50.2)  | 4492<br>(2425,7572)       | 30<br>(16.1,50.7)    | 0.7<br>(-7.6,10)   |
| Somalia                          | 4192<br>(2259,6929)      | 45.3<br>(24.5,75.7)  | 11894<br>(6353,20113)     | 45.4<br>(24.1,77.1)  | 0.4<br>(-6.9,7.7)  |
| United Republic of Tanzania      | 20983<br>(11377,34902)   | 63.6<br>(34.5,105.6) | 44375<br>(23934,74856)    | 63.4<br>(34.2,107.3) | -0.4<br>(-6.9,5.7) |
| Uganda                           | 13943                    | 63.3                 | 33339                     | 63.9                 | 0.9                |

|                             |                          |                     |                           |                     |                    |
|-----------------------------|--------------------------|---------------------|---------------------------|---------------------|--------------------|
|                             | (7541,23182)             | (34.1,106.1)        | (17856,55650)             | (34.6,107.1)        | (-5,7.1)           |
| Zambia                      | 4658<br>(2489,7815)      | 45.4<br>(24.3,76.4) | 10252<br>(5476,17074)     | 45.5<br>(24.3,76)   | 0.3<br>(-6.2,7.4)  |
| South Sudan                 | 3329<br>(1798,5589)      | 45.2<br>(24.5,76.4) | 5309<br>(2786,8813)       | 45.4<br>(23.8,75.7) | 0.5<br>(-6.3,8)    |
| Southern Sub-Saharan Africa | 29891<br>(16028,49948)   | 47.9<br>(25.6,80.1) | 38972<br>(20510,65444)    | 47.9<br>(25.2,80.6) | -0.1<br>(-2.3,2.4) |
| Botswana                    | 790<br>(422,1346)        | 47.7<br>(25.7,80.7) | 1161<br>(626,1953)        | 47.7<br>(25.6,80.1) | -0.1<br>(-6.8,7.2) |
| Lesotho                     | 1062<br>(559,1777)       | 47.8<br>(25.3,80.1) | 1071<br>(575,1808)        | 47.6<br>(25.6,80.7) | -0.3<br>(-7.1,6.5) |
| Namibia                     | 831<br>(449,1406)        | 47.6<br>(25.6,80.6) | 1287<br>(682,2147)        | 47.8<br>(25.4,79.9) | 0.4<br>(-6.2,7.6)  |
| South Africa                | 20226<br>(10887,34202)   | 47.9<br>(25.7,81)   | 26173<br>(13841,44144)    | 47.8<br>(25.4,80.8) | -0.2<br>(-2.7,2.6) |
| Eswatini                    | 511<br>(273,859)         | 48<br>(25.5,80)     | 623<br>(332,1037)         | 47.7<br>(25.4,79.2) | -0.7<br>(-7.1,6)   |
| Zimbabwe                    | 6471<br>(3452,10889)     | 47.8<br>(25.6,79.8) | 8656<br>(4553,14732)      | 48<br>(25.2,81.6)   | 0.3<br>(-6.2,7.6)  |
| Western Sub-Saharan Africa  | 118627<br>(63848,201275) | 48.1<br>(25.8,81.3) | 277878<br>(150490,466382) | 48.5<br>(26.2,81.9) | 0.9<br>(-0.5,2.2)  |
| Benin                       | 3176<br>(1707,5406)      | 48.3<br>(26.3,81.1) | 7930<br>(4207,13506)      | 48.5<br>(26,82.4)   | 0.4<br>(-6.7,7.3)  |
| Burkina Faso                | 6147<br>(3275,10272)     | 48.1<br>(25.9,80.3) | 14140<br>(7663,24033)     | 48.4<br>(26.2,82.3) | 0.5<br>(-5.9,7.6)  |
| Cameroon                    | 7519<br>(4010,12655)     | 55.7<br>(29.7,93.8) | 20151<br>(10927,33855)    | 56.6<br>(30.7,95.2) | 1.5<br>(-6.2,8.9)  |
| Cabo Verde                  | 219<br>(117,367)         | 48.9<br>(26.1,82.5) | 275<br>(148,468)          | 48.7<br>(26.1,82.8) | -0.3<br>(-6.7,6.2) |
| Chad                        | 3858<br>(2053,6592)      | 48.4<br>(25.8,82.5) | 10857<br>(5833,18631)     | 48.3<br>(26.1,82.2) | -0.2<br>(-6.8,6.4) |
| Côte d'Ivoire               | 7688<br>(4117,12999)     | 47.9<br>(25.7,81)   | 15308<br>(8295,25628)     | 48.1<br>(26.1,80.9) | 0.4<br>(-6,7.2)    |
| Gambia                      | 628                      | 48.1                | 1331                      | 48.4                | 0.6                |

|                       |                        |                     |                          |                     |                   |
|-----------------------|------------------------|---------------------|--------------------------|---------------------|-------------------|
|                       | (337,1078)             | (25.8,81.8)         | (711,2253)               | (25.8,81.7)         | (-6.1,8.3)        |
| Ghana                 | 7438<br>(3974,12700)   | 38.5<br>(20.5,64.6) | 13858<br>(7460,23632)    | 38.7<br>(20.8,65.9) | 0.5<br>(-6.7,8.9) |
| Guinea                | 3827<br>(2055,6578)    | 48.4<br>(25.8,82.6) | 7860<br>(4202,13336)     | 48.4<br>(25.8,82)   | 0.1<br>(-6.1,7)   |
| Guinea-Bissau         | 639<br>(343,1073)      | 48.4<br>(26,80.7)   | 1138<br>(614,1926)       | 48.5<br>(25.9,82.4) | 0.2<br>(-6.1,6.5) |
| Liberia               | 1208<br>(649,2058)     | 48<br>(25.9,81.7)   | 2740<br>(1483,4637)      | 48.2<br>(26,81.3)   | 0.4<br>(-6,7.2)   |
| Mali                  | 5832<br>(3194,9879)    | 51.7<br>(28.4,87.5) | 14854<br>(8002,25304)    | 51.8<br>(27.9,88.1) | 0.1<br>(-7.5,8.3) |
| Mauritania            | 1281<br>(699,2146)     | 48.4<br>(26.2,81.8) | 2343<br>(1240,3982)      | 48.5<br>(25.8,82.1) | 0.1<br>(-6.3,7.2) |
| Niger                 | 5236<br>(2856,8800)    | 48.2<br>(25.7,81.2) | 15561<br>(8404,26070)    | 48.3<br>(26,80.8)   | 0.2<br>(-6.3,7)   |
| Nigeria               | 54411<br>(29230,91466) | 48.3<br>(25.9,81.5) | 131162<br>(70477,219881) | 48.6<br>(26,81.9)   | 0.5<br>(-0.8,1.7) |
| Sao Tome and Principe | 77<br>(41,129)         | 48.6<br>(26.2,81.5) | 114<br>(62,194)          | 48.7<br>(26.5,82.5) | 0.2<br>(-6.1,7.3) |
| Senegal               | 4866<br>(2641,8308)    | 48.3<br>(26.1,82.3) | 8824<br>(4670,15055)     | 48.3<br>(25.6,82.3) | 0<br>(-7,6.7)     |
| Sierra Leone          | 2210<br>(1180,3758)    | 48.2<br>(26,81.8)   | 4847<br>(2611,8184)      | 48.3<br>(26.2,81.7) | 0.2<br>(-5.8,7.5) |
| Togo                  | 2364<br>(1279,3933)    | 48.3<br>(26.1,80.7) | 4582<br>(2470,7785)      | 48.4<br>(26.1,82.1) | 0.3<br>(-5.7,6.9) |

AD=atopic dermatitis. DALYs=disability-adjusted life-years. SDI=socio-demographic index.

95% UI=95% uncertainty interval.

**Table S9.** Disability-adjusted-life-years of asthma in accordance with socio-demographic index

| DALYs of Asthma | 1990                         |                         | 2019                         |                        |
|-----------------|------------------------------|-------------------------|------------------------------|------------------------|
|                 | Counts(95% UI)               | Rate(95% UI)            | Counts(95% UI)               | Rate(95% UI)           |
| High SDI        | 3572724<br>(2631002,4836496) | 409.3<br>(295.9,561.9)  | 3002226<br>(2091655,4202058) | 293.7<br>(200.7,419.4) |
| High-middle SDI | 3163145<br>(2458707,4106995) | 286.8<br>(224.3,369.4)  | 2353926<br>(1761732,3168080) | 158.3<br>(114,220.2)   |
| Low SDI         | 3423410<br>(2640397,4076914) | 958.7<br>(705.1,1243.8) | 4188658<br>(3320170,5258768) | 553.9<br>(434.7,726.8) |
| Low-middle SDI  | 6478626<br>(4865662,8029063) | 859.4<br>(615.5,1143.2) | 6558233<br>(5191112,7974147) | 445.9<br>(348.5,546.3) |
| Middle SDI      | 5665089<br>(4635917,6912160) | 419.9<br>(341.9,508.8)  | 5429478<br>(4363001,6758390) | 230.6<br>(183.8,290.3) |

DALYs=disability-adjusted life-years. 95% UI=95% uncertainty interval.

**Table S10.** Disability-adjusted-life-years of atopic dermatitis in accordance with socio-demographic index

| DALYs of AD     | 1990                        |                       | 2019                             |                       |
|-----------------|-----------------------------|-----------------------|----------------------------------|-----------------------|
|                 | Counts(95% UI)              | Rate(95% UI)          | Counts(95% UI)                   | Rate(95% UI)          |
| High SDI        | 1158917<br>(618496,1945587) | 161.8<br>(86.7,272.5) | 1240409<br>(663020,2080100)      | 155.5<br>(83.5,262)   |
| High-middle SDI | 1301514<br>(690908,2189633) | 115.4<br>(61.3,194)   | 1498845<br>(801392,2510050)      | 120.4<br>(63.8,202.2) |
| Low SDI         | 406387<br>(220018,678934)   | 60.7<br>(32.7,101.7)  | 829148<br>(444490,1384307)       | 59.7<br>(32,100.1)    |
| Low-middle SDI  | 1118228<br>(597440,1860639) | 85.5<br>(45.7,142.5)  | 1529171<br>(819894,2548717)      | 83.6<br>(44.8,139.8)  |
| Middle SDI      | 1838886<br>(976566,3084347) | 103.9<br>(55.5,173.6) | 2377976<br>(1262654,3996298<br>) | 102.3<br>(54.3,171.7) |

DALYs=disability-adjusted life-years. 95% UI=95% uncertainty interval.
