# Supplementary material
Source: PubMed Central journal article supplement (PMC10529296)
Supplement: NIHMS1913239-supplement-Supinfo.pdf [file NIHMS1913239-supplement-Supinfo.pdf]

## Contributors

Please see appendix for more detailed information about individual author contributions to the research, divided into the following categories: providing data or critical feedback on data sources; developing methods or computational machinery; providing critical feedback on methods or results; drafting the manuscript or revising it critically for important intellectual content; and managing the estimation or publications process. Youn Ho Shin, Jimin Hwang, Rosie Kwon, Seung Won Lee, and Min Seo Kim contributed equally to this work as first authors. Jae Il Shin and Dong Keon Yon contributed equally to this work as corresponding authors. Dong Keon Yon is a senior author.

### Providing data or critical feedback on data sources

Seung Won Lee, Richard Gyan Aboagye, Hassan Abolhassani, Yonas Derso Abteu, Denberu Eshetie Adane Adane, Qorinah Estiningtyas Sakilah Adnani, Sohail Ahmad, Ali Ahmadi, Ali Ahmed, Ayman Ahmed, Sheikh Mohammad Alif, Zaid Altaany, Khalid A Altirkawi, Nelson Alvis-Guzman, Hany Aly, Judie Arulappan, Tahira Ashraf, Seyyed Shamsadin Athari, Sara Bagherieh, Khuloud Bajbouj, Maciej Banach, Mainak Bardhan, Amadou Barrow, Nebiyou Simegneu Bayileyegn, Ajay Nagesh Bhat, Andras Bikov, Jiao Cai, Mohammadreza Chashmyazdan, Vijay Kumar Chattu, Dinh-Toi Chu, Natália Cruz-Martins, Xiaochen Dai, Giovanni Damiani, Lalit Dandona, Rakhi Dandona, Michael Ekholuenetale, Temitope Cyrus Ekundayo, Adeniyi Francis Fagbamigbe, Ildar Ravisovich Fakhradiyev, Ali Fatehizadeh, Mohammad Fereidouni, Takeshi Fukumoto, Sherief Ghozy, Abraham Tamirat Gizaw, Mahaveer Golechha, Pouya Goleij, Sapna Gupta, Vivek Kumar Gupta, Arvin Haj-Mirzaian, Rabih Halwani, Nobuyuki Horita, Rana Irilouzadian, Nahlah Elkudssiah Ismail, Zhanat Bakhitovna IZB Ispayeva, Chidozie C D Iwu, Linda Merin J, Shubha Jayaram, Jost B Jonas,

Billingsley Kaambwa, Zubair Kabir, Himal Kandel, Rami S Kantar, Harkiran Kaur, Yousef Saleh Khader, Himanshu Khajuria, Imteyaz A Khan, Maseer Khan, Moien AB Khan, Saval Khanal, Jagdish Khubchandani, Adnan Kisa, Sezer Kisa, Oleksii Korzh, Kewal Krishan, G Anil Kumar, L V Simhachalam Kutikuppala, Kamaluddin Latief, Thao Thi Thu Le, Yo Han Lee, Shanshan Li, Virendra S Ligade, Stephen S Lim, Gang Liu, Wei Liu, Xuefeng Liu, Deborah Carvalho Malta, Abdullah A Mamun, Andrea Maugeri, Ritesh G Menezes, Le Huu Nhat Minh, Erkin M Mirrakhimov, Awoke Misganaw, Shafiu Mohammed, Ali H Mokdad, Sara Momtazmanesh, Ghulam Mustafa, Sreenivas Narasimha Swamy, Zuhair S Natto, Biswa Prakash Nayak, Tze Pin Ng, Dang H Nguyen, Van Thanh Nguyen, Robina Khan Niazi, Hasti Nouraei, Ogochukwu Janet Nzoputam, Bogdan Oancea, Osaretin Christabel Okonji, Patrick Godwin Okwute, Andrew T Olagunju, Hans Orru, Mahesh P A, Jagadish Rao Padubidri, Anamika Pandey, Shahina Pardhan, Jay Patel, Shankargouda Patil, Venkata Suresh Patthipati, Renato B Pereira, Vivek Podder, Ibrahim Qattee, Navid Rabiee, Mehran Rahimi, Amir Masoud Rahmani, Shayan Rahmani, Pradhun Ram, Ahmed Mustafa Rashid, Zubair Ahmed Ratan, Salman Rawaf, Lal Rawal, Elrashdy Moustafa Mohamed Redwan, Nima Rezaei, Jefferson Antonio Buendia Rodriguez, Leonardo Roever, Luca Ronfani, Aly M A Saad, Basema Saddik, Umar Saeed, Harihar Sahoo, Mirza Rizwan Sajid, Abdallah M Samy, Milena M Santric-Milicevic, Maryam Sarkhosh, Ganesh Kumar Saya, Subramanian Senthilkumaran, Humaira Shah, Masood Ali Shaikh, Mohd Shanawaz, Parnian Shobeiri, Jasvinder A Singh, Virendra Singh, Anna Aleksandrovna Skryabina, Yonatan Solomon, Sergey Soshnikov, Ireneous N Soyiri, Mindy D Szeto, Ker-Kan Tan, Pugazhenthana Thangaraju, Tala Tillawi, Mai Thi Ngoc Tran, Irfan Ullah, Saif Ullah, Sana Ullah, Era Upadhyay, Job F M van Boven, Tommi Juhani Vasankari, Georgios-Ioannis Verras, Francesco S Violante, Ronny Westerman, Hywel C Williams, Naohiro Yonemoto, Chuanhua Yu, Heather J Zar, Iman Zare, Mikhail Sergeevich Zastrozhin, Zhi-Jiang Zhang, Mohammad Zoladl, and Dong Keon Yon.

### Developing methods or computational machinery

Seung Won Lee, Rishan Adha, Qorinah Estiningtyas Sakilah Adnani, Ali Ahmadi, Zaid Altaany, Khuloud Bajbouj, Xiaochen Dai, Adeniyi Francis Fagbamigbe, Ali Fatehizadeh, Sherief Ghozy, Mohammad Heidari, Adnan Kisa, Thao Thi Thu Le, Le Huu Nhat Minh, Ali H Mokdad, Ghulam Mustafa, Van Thanh Nguyen, Navid Rabiee, Amir Masoud Rahmani, Pradhun Ram, Umar Saeed, Abdallah M Samy, Ganesh Kumar Saya, Theo Vos, Ronny Westerman, and Dong Keon Yon.

### Providing critical feedback on methods or results

Youn Ho Shin, Jimin Hwang, Rosie Kwon, Seung Won Lee, Min Seo Kim, Yohannes Habtegiorgis Abate, Michael Abdelmasseh, Deldar Morad Abdulah, Richard Gyan Aboagye, Hassan Abolhassani, Elissa M Abrams, Yonas Derso Abteu, Denberu Eshetie Adane Adane, Tigist Demssew Adane, Isaac Yeboah Addo, Rishan Adha, Amin Adibi, Qorinah Estiningtyas Sakilah Adnani, Anurag Agrawal, Sohail Ahmad, Ali Ahmadi, Ali Ahmed, Ayman Ahmed, Sayer Al-Azzam, Sheikh Mohammad Alif, Vahid Alipour, Zaid Altaany, Khalid A Altirkawi, Nelson Alvis-Guzman, Hany Aly, Adnan Ansar, Judie Arulappan, Mohammad Asghari-Jafarabadi, Tahira Ashraf, Seyyed Shamsadin Athari, Daniel Atlaw, Avinash Aujayeb, Sina Azadnajafabad, Mahsa Babaei, Hassan Babamohamadi, Alaa Badawi, Nayereh Baghcheghi, Sara Bagherieh, Khuloud Bajbouj, Maciej Banach, Mainak Bardhan, Amadou Barrow, Nebiyu Simegneu Bayileyeegn, Isabela M Bensenor, Alemshet Yirga Berhie, Akshaya Srikanth Bhagavathula, Pankaj Bhardwaj, Ajay Nagesh Bhat, Vijayalakshmi S Bhojaraja, Ali Bijani, Andras Bikov, Jiao Cai, Josip Car, Sinclair Carr, Promit Ananyo

Chakraborty, Periklis Charalampous, Mohammadreza Chashmyazdan, Vijay Kumar Chattu, Mohiuddin Ahsanul Kabir Chowdhury, Dinh-Toi Chu, Barbara Corso, Natália Cruz-Martins, Omid Dadras, Xiaochen Dai, Giovanni Damiani, Lalit Dandona, Rakhi Dandona, Dessalegn Demeke, Biniyam Demisse, Daniel Diaz, Mengistie Diress, Deepa Dongarwar, Michael Ekholuenetale, Temitope Cyrus Ekundayo, Muhammed Elhadi, Omar Abdelsadek Abdou Elmeligy, Habtamu Esubalew, Farshid Etaee, Adeniyi Francis Fagbamigbe, Ildar Ravisovich Fakhradiyev, Ali Fatehizadeh, Syeda Anum Fatima Fatima, Xiaoqi Feng, Mohammad Fereidouni, Nuno Ferreira, Getahun Fetensa, Florian Fischer, Masoud Foroutan, Takeshi Fukumoto, Abduzhappar Gaipov, Abera Getachew Obsa, Sherief Ghozy, Abraham Tamirat Gizaw, Admasu Belay AB Gizaw, Mohamad Goldust, Mahaveer Golechha, Sapna Gupta, Vivek Kumar Gupta, Arvin Haj-Mirzaian, Rabih Halwani, Samer Hamidi, Ahmed I Hasaballah, Hamidreza Hasani, Abdiwahab Hashi, Mohammed Bheser Hassen, Behzad Heibati, Golnaz Heidari, Mohammad Heidari, Mahsa Heidari-Faroozan, Ramesh Holla, Nobuyuki Horita, Md Shakhaoat Hossain, Salman Hussain, Bing-Fang Hwang, Irena M Ilic, Milena D Ilic, Rana Irilouzadian, Nahlah Elkudssiah Ismail, Zhanat Bakhitovna IZB Ispayeva, Chidozie C D Iwu, Linda Merin J, Maziar Jajarmi, Elham Jamshidi, Manthan Dilipkumar Janodia, Shubha Jayaram, Rime Jebai, Jost B Jonas, Billingsley Kaambwa, Zubair Kabir, Feroze Kaliyadan, Himal Kandel, Rami S Kantar, Ibraheem M Karaye, Hanie Karimi, Harkiran Kaur, Leila Keikavoosi-Arani, Mohammad Keykhaei, Yousef Saleh Khader, Himanshu Khajuria, Imteyaz A Khan, Maseer Khan, Moien AB Khan, Saval Khanal, Moawiah Mohammad Khatatbeh, Jagdish Khubchandani, Biruk Getahun Kibret, Adnan Kisa, Sezer Kisa, Pavel Kolchir, Farzad Kompani, Hamid Reza Koohestani, Oleksii Korzh, Ai Koyanagi, Kewal Krishan, Claudia E Kuehni, G Anil Kumar, Om P Kurmi, L V Simhachalam Kutikuppala, Ambily Kuttikkattu, Judit Lám, Bagher Larijani, Kamaluddin Latief, Thao Thi Thu Le, Yo Han Lee, Jacopo Lenzi, Ming-Chieh Li, Shanshan Li, Virendra

S Ligade, Stephen S Lim, Gang Liu, Wei Liu, Xuefeng Liu, Chun-Han Lo, Graciliana Lopes, Soundarya Mahalingam, Sandeep B Maharaj, Mansour Adam Mahmoud, Azeem Majeed, Mohammad-Reza Malekpour, Ahmad Azam Malik, Tauqeer Hussain Mallhi, Deborah Carvalho Malta, Abdullah A Mamun, Andrea Maugeri, John Robert Carabeo Medina, Ritesh G Menezes, Alexios-Fotios A Mentis, Tomislav Mestrovic, Irmina Maria Michalek, Le Huu Nhat Minh, Erkin M Mirrakhimov, Awoke Misganaw, Manish Mishra, Shafiu Mohammed, Ali H Mokdad, Sara Momtazmanesh, Lorenzo Monasta, Md Moniruzzaman, Temesgen Mulugeta, Daniel Munblit, Efrén Murillo-Zamora, Ghulam Mustafa, Tapas Sadasivan Nair, Vinay Nangia, Sreenivas Narasimha Swamy, Hasan Nassereldine, Zuhair S Natto, Biswa Prakash Nayak, Javad Nazari, Tze Pin Ng, Dang H Nguyen, Van Thanh Nguyen, Robina Khan Niazi, Ogochukwu Janet Nzopotam, Bogdan Oancea, Rahman Md Obaidur, Hassan Okati-Aliabad, Osaretin Christabel Okonji, Patrick Godwin Okwute, Andrew T Olagunju, Isaac Iyinoluwa Olufadewa, Hans Orru, Mahesh P A, Jagadish Rao Padubidri, Anamika Pandey, Shahina Pardhan, Eun-Kee Park, Jay Patel, Shankargouda Patil, Venkata Suresh Patthipati, Uttam Paudel, Marcos Pereira, Renato B Pereira, Ionela-Roxana Petcu, Indrashis Podder, Vivek Podder, Ibrahim Qattea, Navid Rabiee, Mehran Rahimi, Mosiur Rahman, Muhammad Aziz Rahman, Amir Masoud Rahmani, Shayan Rahmani, Vahid Rahmanian, Prashant Rajput, Pradhun Ram, Premkumar Ramasubramani, Indu Ramachandra Rao, Ahmed Mustafa Rashid, Zubair Ahmed Ratan, Nakul Ravikumar, Salman Rawaf, Lal Rawal, Elrashdy Moustafa Mohamed Redwan, Aavishkar Raj Regmi, Nazila Rezaei, Negar Rezaei, Nima Rezaei, Saeid Rezaei, Mohsen Rezaeian, Jefferson Antonio Buendia Rodriguez, Leonardo Roever, Esperanza Romero-Rodríguez, Aly M A Saad, Basema Saddik, Umar Saeed, Fatemeh Saheb Sharif-Askari, Harihar Sahoo, Mirza Rizwan Sajid, Joseph W Sakshaug, Sana Salehi, Abdallah M Samy, Milena M Santric-Milicevic, Ganesh Kumar Saya, Humaira Shah, Masood Ali Shaikh, Mohd Shanawaz, Aziz Sheikh, Mika Shigematsu,

Parnian Shobeiri, Seyed Afshin Shorofi, Migbar Mekonnen Sibhat, Jasvinder A Singh, Paramdeep Singh, Surjit Singh, Md Shahjahan Siraj, Anna Aleksandrovna Skryabina, Yonatan Solomon, Suhang Song, Sergey Soshnikov, Ireneous N Soyiri, Mindy D Szeto, Iman M Talaat, Jacques JL Lukenze Tamuzi, Ker-Kan Tan, Mohamad-Hani Temsah, Pugazhenthan Thangaraju, Jansje Henny Vera Ticoalu, Tala Tillawi, Mai Thi Ngoc Tran, Irfan Ullah, Saif Ullah, Sana Ullah, Era Upadhyay, Seyed Mohammad Vahabi, Job F M van Boven, Georgios-Ioannis Verras, Rafael José Vieira, Theo Vos, Ronny Westerman, Nuwan Darshana Wickramasinghe, Hywel C Williams, Dereje Y Yada, Yazachew Yismaw, Naohiro Yonemoto, Chuanhua Yu, Ismaeel Yunusa, Mazyar Zahir, Heather J Zar, Mikhail Sergeevich Zastrozhin, Mohammad A Zeineddine, Getachew Assefa Zenebe, Zhi-Jiang Zhang, Hanqing Zhao, Mohammad Zoladl, Jae Il Shin, and Dong Keon Yon.

#### [Drafting the work or revising it critically for important intellectual content](#)

Youn Ho Shin, Jimin Hwang, Rosie Kwon, Seung Won Lee, Min Seo Kim, Mohsen Abbasi-Kangevari, Zeinab Abbasi-Kangevari, Michael Abdelmasseh, Hassan Abolhassani, Eman Abu-Gharbieh, Denberu Eshetie Adane Adane, Isaac Yeboah Addo, Rishan Adha, Qorinah Estiningtyas Sakilah Adnani, Sohail Ahmad, Ali Ahmadi, Ali Ahmed, Ayman Ahmed, Sayer Al-Azzam, Fadwa Alhalaiqa Naji Alhalaiqa, Sheikh Mohammad Alif, Zaid Altaany, Nelson Alvis-Guzman, Hany Aly, Judie Arulappan, Mohammad Asghari-Jafarabadi, Seyyed Shamsadin Athari, Daniel Atlaw, Avinash Aujayeb, Sina Azadnajafabad, Mahsa Babaei, Hassan Babamohamadi, Alaa Badawi, Sara Bagherieh, Khuloud Bajbouj, Maciej Banach, Mainak Bardhan, Francesco Barone-Adesi, Amadou Barrow, Azadeh Bashiri, Isabela M Bensor, Kebede A Beyene, Akshaya Srikanth Bhagavathula, Vijayalakshmi S Bhojaraja, Andras Bikov, Jiao Cai, Paulo Camargos, Josip Car, Sinclair Carr, Andrea Carugno, Jeffrey

Shi Kai Chan, Vijay Kumar Chattu, Dinh-Toi Chu, Natália Cruz-Martins, Giovanni Damiani, Biniyam Demisse, Daniel Diaz, Deepa Dongarwar, Muhammed Elhadi, Omar Abdelsadek Abdou Elmeligy, Farshid Etaee, Azin Etemadimanesh, Adeniyi Francis Fagbamigbe, Ildar Ravisovich Fakhradiyev, Ali Fatehizadeh, Syeda Anum Fatima Fatima, Mohammad Fereidouni, Nuno Ferreira, Getahun Fetensa, Florian Fischer, Masoud Foroutan, Takeshi Fukumoto, Abduzhappar Gaipov, Yibeltal Yismaw Gela, Abera Getachew Obsa, Fataneh Ghadirian, Seyyed-Hadi Ghamari, Sherief Ghozy, Richard F Gillum, Mohamad Goldust, Vivek Kumar Gupta, Rabih Halwani, Md Abdul Hannan, Ahmed I Hasaballah, Hamidreza Hasani, Abdiwahab Hashi, Golnaz Heidari, Ramesh Holla, Nobuyuki Horita, Md Shakhaoat Hossain, Salman Hussain, Irena M Ilic, Milena D Ilic, Rana Irilouzadian, Nahlah Elkudssiah Ismail, Zhanat Bakhitovna IZB Ispayeva, Chidozie C D Iwu, Linda Merin J, Manthan Dilipkumar Janodia, Shubha Jayaram, Rime Jebai, Jost B Jonas, Nitin Joseph, Feroze Kaliyadan, Himal Kandel, Rami S Kantar, Hanie Karimi, Maseer Khan, Moien AB Khan, Saval Khanal, Moawiah Mohammad Khatatbeh, Jagdish Khubchandani, Biruk Getahun Kibret, Adnan Kisa, Sezer Kisa, Pavel Kolkhir, Oleksii Korzh, Parvaiz A Koul, Ai Koyanagi, Kewal Krishan, Claudia E Kuehni, Om P Kurmi, Judit Lám, Bagher Larijani, Kamaluddin Latief, Paolo Lauriola, Thao Thi Thu Le, Jacopo Lenzi, Shanshan Li, Gang Liu, Wei Liu, Chun-Han Lo, Graciliana Lopes, Soundarya Mahalingam, Mansour Adam Mahmoud, Mohammad-Reza Malekpour, Ahmad Azam Malik, Tauqeer Hussain Mallhi, Deborah Carvalho Malta, Abdullah A Mamun, Seyedeh Zahra Masoumi, Andrea Maugeri, Ritesh G Menezes, George A Mensah, Tomislav Mestrovic, Irmina Maria Michalek, Le Huu Nhat Minh, Awoke Misganaw, Shafiu Mohammed, Ali H Mokdad, Sara Momtazmanesh, Lorenzo Monasta, Md Moniruzzaman, Temesgen Mulugeta, Daniel Munblit, Efrén Murillo-Zamora, Ghulam Mustafa, Sreenivas Narasimha Swamy, Hasan Nassereldine, Zuhair S Natto, Biswa Prakash Nayak, Javad Nazari, Tze Pin Ng, Dang H Nguyen, Van Thanh Nguyen, Robina

Khan Niazi, Ogochukwu Janet Nzopotam, Bogdan Oancea, Osaretin Christabel Okonji, Patrick Godwin Okwute, Andrew T Olagunju, Mahesh P A, Jagadish Rao Padubidri, Shahina Pardhan, Jay Patel, Shankargouda Patil, Venkata Suresh Patthipati, Uttam Paudel, Marcos Pereira, Renato B Pereira, Ionela-Roxana Petcu, Indrashis Podder, Vivek Podder, Arash Pour Mohammad, Navid Rabiee, Mehran Rahimi, Shayan Rahmani, Prashant Rajput, Pradhun Ram, Premkumar Ramasubramani, Indu Ramachandra Rao, Zubair Ahmed Ratan, Nakul Ravikumar, Salman Rawaf, Lal Rawal, Elrashdy Moustafa Mohamed Redwan, Aavishkar Raj Regmi, Nima Rezaei, Saeid Rezaei, Jefferson Antonio Buendia Rodriguez, Leonardo Roever, Esperanza Romero-Rodríguez, Luca Ronfani, Aly M A Saad, Basema Saddik, Umar Saeed, Dominic Sagoe, Fatemeh Saheb Sharif-Askari, Amirhossein Sahebkar, Mirza Rizwan Sajid, Saina Salahi, Abdallah M Samy, Milena M Santric-Milicevic, Made Ary Sarasmita, Ganesh Kumar Saya, Mohd Shanawaz, Shashank Shekhar, Mika Shigematsu, Parnian Shobeiri, Seyed Afshin Shorofi, Colin R Simpson, Jasvinder A Singh, Paramdeep Singh, Anna Aleksandrovna Skryabina, Yonatan Solomon, Suhang Song, Ireneous N Soyiri, Paschalis Steiropoulos, Mindy D Szeto, Iman M Talaat, Jacques JL Lukenze Tamuzi, Ker-Kan Tan, Nathan Y Tat, Mohamad-Hani Temsah, Dufera Rikitu Terefa, Riki Tesler, Pugazhenthan Thangaraju, Jansje Henny Vera Ticoalu, Tala Tillawi, Mai Thi Ngoc Tran, Biruk Shalmeno Tusa, Irfan Ullah, Saif Ullah, Era Upadhyay, Job F M van Boven, Tommi Juhani Vasankari, Georgios-Ioannis Verras, Rafael José Vieira, Francesco S Violante, Theo Vos, Ronny Westerman, Nuwan Darshana Wickramasinghe, Naohiro Yonemoto, Mazyar Zahir, Iman Zare, Mikhail Sergeevich Zastrozhin, Mohammad A Zeineddine, Getachew Assefa Zenebe, Hanqing Zhao, Mohammad Zoladl, Jae Il Shin, and Dong Keon Yon.

[Managing the estimation or publications process](#)



Youn Ho Shin, Jimin Hwang, Rosie Kwon, Seung Won Lee, Denberu Eshetie Adane Adane, Ali Ahmadi, Ali Fatehizadeh, Sherief Ghozy, Rana Irilouzadian, Linda Merin J, Parvaiz A Koul, L V Simhachalam Kutikuppala, Bagher Larijani, Thao Thi Thu Le, Le Huu Nhat Minh, Ali H Mokdad, Ghulam Mustafa, Javad Nazari, Van Thanh Nguyen, Mahesh P A, Aly M A Saad, Abdallah M Samy, Pugazhenthan Thangaraju, Mikhail Sergeevich Zastrozhin, Jae Il Shin, and Dong Keon Yon.
